# Supplementary material for: Frequent intra- and inter-species introgression shapes the landscape of genetic variation in bread wheat
Source: Genome Biol. 2019 Jul 12;20:136. doi: 10.1186/s13059-019-1744-x (PMC6624984; doi:10.1186/s13059-019-1744-x)
Supplement: Supplementary file 5 — Table S6. The deleted CNV regions (CNVRs) on D subgenome of wheat based on IWGSC Refseq v1.0. (XLSX 6430 kb) [file 13059_2019_1744_MOESM5_ESM.xlsx]

## Sheet: Table S6
Table S6 The deleted CNV regions (CNVRs) on D subgenome of wheat based on IWGSC Refseq v1.0. The location and length of each accession are provided. The CNVRs were genotyped, with AA, Ad and dd representing normal, heterozygous, and homozygous samples respectively.
Chr	Start	End	Length	C10	C31	C33	C32	C34	C35	C20	C21	C11	C1	C12	C13	C14	C15	C16	C17	C18	C19	C22	C2	C23	C24	C25	C26	C27	C28	C29	C30	C3	C4	C5	C6	C7	C8	C9	C48	A1	C49	C51	C52	CS	C53	C54	C55	C56	C57
chr1D	19501	26000	6500	AA	dd	AA	AA	AA	AB	AA	Ad	dd	AA	dd	dd	dd	AA	AA	dd	AA	dd	AA	AB	AA	AA	AA	dd	AA	AA	dd	Ad	AB	AA	Ad	dd	AA	AA	dd	dd	dd	AA	AA	dd	AA	AA	AA	AA	AA	AA
chr1D	34501	42500	8000	Ad	dd	Ad	Ad	AA	Ad	AA	dd	dd	AA	dd	dd	dd	AA	Ad	dd	Ad	dd	Ad	AA	AA	AA	AA	dd	AA	Ad	AA	AB	Ad	AA	Ad	dd	AA	AA	dd	dd	dd	AA	AA	dd	AA	AA	AA	AA	AA	AB
chr1D	34501	50500	16000	Ad	dd	AA	Ad	AA	Ad	AA	dd	dd	AA	dd	dd	dd	AA	AA	dd	AA	dd	AA	AA	AA	AA	AA	dd	AA	AA	AA	AA	Ad	AA	Ad	dd	AA	AA	dd	dd	dd	AA	AA	dd	AA	AA	AA	AA	AA	AA
chr1D	59501	73000	13500	AA	dd	AA	AA	AA	AA	AA	Ad	dd	AA	dd	dd	dd	AA	AA	dd	AA	dd	AA	AA	AA	AA	AA	dd	AA	AA	AA	AA	AA	AA	Ad	dd	AA	AA	dd	dd	dd	AA	AA	dd	AA	AA	AA	AA	AA	AA
chr1D	67001	77000	10000	AB	Ad	AA	AA	AA	AA	AA	Ad	Ad	AA	dd	Ad	dd	AA	AA	Ad	AA	Ad	AA	AA	AB	AB	AA	Ad	AA	AA	AA	AA	AA	AA	AA	dd	AA	AA	dd	Ad	dd	AB	AB	Ad	AA	AA	AA	AA	AA	AB
chr1D	147501	151500	4000	AA	dd	AA	AA	Ad	AB	AA	dd	dd	AA	dd	dd	dd	Ad	AA	dd	AA	dd	AA	AA	AA	AA	AA	dd	AA	AA	AA	AA	AA	AA	Ad	dd	AB	AB	dd	dd	AA	Ad	AA	dd	AA	AA	AA	AA	Ad	Ad
chr1D	221001	232000	11000	AA	dd	AA	AA	AA	AA	AA	Ad	Ad	AA	Ad	Ad	Ad	AA	AA	Ad	AA	Ad	AA	AA	AA	AA	AA	dd	AB	AA	AA	AB	AA	AA	AA	Ad	AA	AA	Ad	dd	AA	AB	AA	Ad	AA	AA	AA	AA	AA	AB
chr1D	227501	232000	4500	AA	dd	AA	AA	AB	AA	AA	Ad	dd	AB	dd	dd	dd	AB	AB	dd	AA	dd	AA	AA	AA	AA	AA	dd	AA	AA	AA	AA	Ad	AA	AA	dd	AA	AA	dd	dd	AA	AB	AA	dd	AA	AA	AB	AA	AA	AB
chr1D	276501	291500	15000	AA	M	AA	AA	AA	AA	AA	AA	AA	AA	AA	AA	AA	M	AA	AA	BB	AA	AA	AA	AA	AA	M	AA	AA	AA	AA	AA	AA	AB	M	M	AA	AA	AA	M	dd	AA	AA	M	AA	BB	AA	AA	BB	AB
chr1D	344001	356500	12500	AA	dd	AA	AA	AA	dd	dd	Ad	dd	AA	dd	dd	dd	dd	dd	dd	dd	dd	AA	AA	AA	AA	dd	dd	AA	AA	AA	AA	AA	dd	dd	dd	AA	AA	dd	dd	AA	AB	AA	AA	AA	dd	AA	AA	dd	dd
chr1D	351001	356500	5500	AA	dd	AA	AA	AA	dd	dd	dd	dd	AA	dd	dd	dd	dd	dd	dd	dd	dd	AA	AA	AA	AA	dd	dd	AA	AA	AA	AA	AA	dd	dd	dd	AA	AA	dd	dd	AA	AA	AA	AA	AA	dd	AA	AA	dd	dd
chr1D	441501	446000	4500	AA	Ad	AA	AA	AA	AA	AA	AA	AA	Ad	AA	Ad	AA	AA	AA	AA	AA	AA	AA	AA	AA	AA	AA	AA	Ad	AA	AA	AA	AA	AA	AA	AA	AA	AA	AA	Ad	dd	AA	AA	Ad	AA	Ad	AA	AA	Ad	Ad
chr1D	454001	458000	4000	AA	Ad	AA	AA	AA	AA	AA	AA	AA	AA	Ad	Ad	Ad	Ad	Ad	Ad	Ad	Ad	AA	AA	AA	AB	AA	AA	AA	AA	AA	AA	AA	AA	AA	Ad	Ad	AA	AA	AA	dd	AA	AA	AB	AA	AA	AB	AA	Ad	AB
chr1D	472501	476500	4000	dd	dd	Ad	Ad	Ad	dd	Ad	Ad	Ad	Ad	Ad	Ad	Ad	dd	dd	Ad	Ad	Ad	Ad	Ad	Ad	Ad	Ad	Ad	Ad	Ad	Ad	Ad	Ad	Ad	Ad	Ad	Ad	Ad	Ad	dd	dd	Ad	Ad	dd	Ad	Ad	Ad	Ad	Ad	Ad
chr1D	521001	534500	13500	AA	AA	AA	AA	BB	M	BC	BB	AA	M	AA	AA	AA	AA	AA	AA	AA	AA	BC	M	BC	M	AA	AA	AA	BB	M	M	M	AA	M	M	M	AA	AA	AA	AA	AA	AA	AA	AA	AA	AA	AA	AA	dd
chr1D	521001	567500	46500	AA	AA	AA	AA	AA	M	M	AB	AA	M	AA	AA	AA	AA	AA	AA	AA	AA	AA	M	M	M	AA	AA	AA	BB	M	M	M	AA	M	M	M	AA	AA	AA	AA	AA	AA	AA	AA	AA	AA	AA	AA	dd
chr1D	642001	719000	77000	dd	AA	dd	dd	dd	dd	dd	dd	dd	dd	dd	dd	dd	dd	AA	dd	dd	dd	dd	dd	AA	dd	dd	dd	dd	AA	dd	dd	dd	dd	dd	dd	AA	dd	dd	AA	dd	dd	dd	dd	AA	dd	dd	dd	dd	dd
chr1D	688001	721500	33500	dd	Ad	dd	dd	dd	dd	dd	dd	dd	dd	dd	dd	dd	dd	Ad	dd	dd	dd	dd	dd	AA	dd	dd	dd	dd	AA	dd	dd	dd	dd	dd	dd	AA	dd	dd	Ad	Ad	dd	dd	dd	AA	dd	dd	dd	dd	dd
chr1D	745001	749000	4000	Ad	AA	Ad	Ad	Ad	Ad	dd	dd	dd	Ad	dd	dd	dd	dd	Ad	dd	Ad	dd	dd	dd	AB	dd	dd	dd	dd	AA	Ad	Ad	dd	dd	Ad	Ad	AB	dd	dd	AA	dd	dd	dd	Ad	AA	Ad	dd	dd	Ad	dd
chr1D	752001	763500	11500	dd	AA	dd	dd	dd	dd	dd	dd	dd	dd	dd	dd	dd	dd	AA	dd	dd	dd	dd	dd	AA	dd	dd	dd	dd	AA	dd	dd	dd	dd	dd	dd	AA	dd	dd	AA	AA	dd	dd	dd	AA	dd	dd	dd	dd	dd
chr1D	754001	783000	29000	dd	Ad	dd	dd	dd	dd	dd	dd	dd	dd	dd	dd	dd	dd	dd	dd	dd	dd	dd	dd	AA	dd	dd	dd	dd	Ad	dd	dd	dd	dd	dd	dd	AA	dd	dd	Ad	AA	dd	dd	dd	AA	dd	dd	dd	dd	dd
chr1D	774501	818000	43500	dd	Ad	dd	dd	dd	dd	dd	dd	dd	dd	dd	dd	dd	dd	Ad	dd	dd	dd	dd	dd	dd	dd	dd	dd	dd	AA	dd	dd	dd	dd	dd	dd	AA	dd	dd	dd	AA	dd	dd	dd	AA	dd	dd	dd	dd	dd
chr1D	859001	886500	27500	dd	Ad	dd	dd	dd	dd	dd	dd	dd	dd	dd	dd	dd	dd	Ad	dd	dd	dd	dd	dd	dd	dd	dd	dd	dd	AA	dd	dd	dd	dd	dd	dd	AA	dd	dd	Ad	AA	dd	dd	dd	AA	dd	dd	dd	dd	dd
chr1D	910001	923000	13000	dd	dd	dd	dd	dd	dd	dd	dd	dd	dd	dd	dd	dd	dd	dd	dd	dd	dd	dd	dd	dd	dd	dd	dd	dd	AA	dd	dd	dd	dd	dd	dd	AA	dd	dd	dd	AA	dd	dd	dd	AA	dd	dd	dd	dd	dd
chr1D	1012501	1017500	5000	dd	dd	dd	dd	dd	dd	dd	dd	dd	dd	dd	dd	dd	dd	dd	dd	dd	dd	dd	dd	dd	dd	dd	dd	dd	Ad	dd	dd	dd	dd	dd	dd	Ad	dd	dd	dd	AA	dd	dd	dd	AA	dd	dd	dd	dd	dd
chr1D	1137501	1141500	4000	dd	dd	dd	dd	dd	dd	dd	dd	dd	dd	dd	dd	dd	dd	dd	dd	dd	dd	dd	dd	dd	dd	dd	dd	dd	dd	dd	dd	dd	dd	dd	dd	AA	dd	dd	dd	AA	dd	dd	dd	AA	dd	dd	dd	dd	dd
chr1D	1211501	1222500	11000	dd	dd	dd	dd	dd	dd	dd	dd	dd	dd	dd	dd	dd	dd	dd	dd	dd	dd	dd	dd	dd	dd	dd	dd	dd	dd	dd	dd	dd	dd	dd	dd	AA	dd	dd	dd	AA	dd	dd	dd	AA	dd	dd	dd	dd	dd
chr1D	1259001	1267500	8500	dd	dd	dd	dd	dd	dd	dd	dd	dd	dd	dd	dd	dd	dd	dd	dd	dd	dd	dd	dd	dd	dd	dd	dd	dd	dd	dd	dd	dd	dd	dd	dd	AA	dd	dd	dd	Ad	dd	dd	dd	AA	dd	dd	dd	dd	dd
chr1D	1310501	1351000	40500	dd	dd	dd	dd	dd	dd	dd	dd	dd	dd	dd	dd	dd	dd	dd	dd	dd	dd	dd	dd	dd	dd	dd	dd	dd	dd	dd	dd	dd	dd	dd	dd	AA	dd	dd	dd	AA	dd	dd	dd	AA	dd	dd	dd	dd	dd
chr1D	1410501	1419000	8500	dd	dd	dd	dd	dd	dd	dd	dd	dd	dd	dd	dd	dd	dd	dd	dd	dd	dd	dd	dd	dd	dd	dd	dd	dd	dd	dd	dd	dd	dd	dd	dd	AA	dd	dd	dd	Ad	dd	dd	dd	AA	dd	dd	dd	dd	dd
chr1D	1451001	1459500	8500	dd	dd	dd	dd	dd	dd	dd	dd	dd	dd	dd	dd	dd	dd	dd	dd	dd	dd	dd	dd	dd	dd	dd	dd	dd	dd	dd	dd	dd	dd	dd	dd	BB	dd	dd	dd	AA	dd	dd	dd	AA	dd	dd	dd	dd	dd
chr1D	1514501	1519500	5000	dd	dd	dd	dd	dd	dd	dd	dd	dd	dd	dd	dd	dd	dd	dd	dd	dd	dd	dd	dd	dd	dd	dd	dd	dd	dd	dd	dd	dd	dd	dd	dd	AA	dd	dd	dd	AA	dd	dd	dd	AA	dd	dd	dd	dd	dd
chr1D	1645501	1657500	12000	dd	dd	dd	dd	dd	dd	dd	dd	dd	dd	dd	dd	dd	dd	dd	dd	dd	dd	dd	dd	dd	dd	dd	dd	dd	dd	dd	dd	dd	dd	dd	dd	AA	dd	dd	dd	AA	dd	dd	dd	AA	dd	dd	dd	dd	dd
chr1D	1651501	1657500	6000	dd	dd	dd	dd	dd	dd	dd	dd	dd	dd	dd	dd	dd	dd	dd	dd	dd	dd	dd	dd	dd	dd	dd	dd	dd	dd	dd	dd	dd	dd	dd	dd	AA	dd	dd	dd	AA	dd	dd	dd	AA	dd	dd	dd	dd	dd
chr1D	1672501	1681500	9000	dd	dd	dd	dd	dd	dd	dd	dd	dd	dd	dd	dd	dd	dd	dd	dd	dd	dd	dd	dd	dd	dd	dd	dd	dd	dd	dd	dd	dd	dd	dd	dd	AA	dd	dd	dd	AA	dd	dd	dd	AA	dd	dd	dd	dd	dd
chr1D	1675001	1709000	34000	dd	dd	dd	dd	dd	dd	dd	dd	dd	dd	dd	dd	dd	dd	dd	dd	dd	dd	dd	dd	dd	dd	dd	dd	dd	dd	dd	dd	dd	dd	dd	dd	AA	dd	dd	dd	AA	dd	dd	dd	AA	dd	dd	dd	dd	dd
chr1D	1700501	1709000	8500	dd	dd	dd	dd	dd	dd	dd	dd	dd	dd	dd	dd	dd	dd	dd	dd	dd	dd	dd	dd	dd	dd	dd	dd	dd	dd	dd	dd	dd	dd	dd	dd	AA	dd	dd	dd	AA	dd	dd	dd	AA	dd	dd	dd	dd	dd
chr1D	1723001	1751500	28500	dd	dd	dd	dd	dd	dd	dd	dd	dd	dd	dd	dd	dd	dd	dd	dd	dd	dd	dd	dd	dd	dd	dd	dd	dd	dd	dd	dd	dd	dd	dd	dd	AA	dd	dd	dd	AA	dd	dd	dd	AA	dd	dd	dd	dd	dd
chr1D	1801501	1806000	4500	dd	dd	dd	dd	dd	dd	Ad	dd	dd	dd	dd	dd	dd	dd	dd	dd	dd	dd	dd	dd	dd	dd	dd	dd	dd	dd	dd	dd	dd	dd	dd	dd	AB	dd	dd	dd	AA	dd	dd	dd	AA	dd	dd	dd	dd	dd
chr1D	1931001	1939000	8000	dd	dd	dd	dd	dd	dd	dd	dd	dd	dd	dd	dd	dd	dd	dd	dd	dd	dd	dd	dd	dd	dd	dd	dd	dd	dd	dd	dd	dd	dd	dd	dd	AB	dd	dd	dd	dd	dd	dd	dd	AA	dd	dd	dd	dd	dd
chr1D	1949001	1955500	6500	dd	dd	dd	dd	dd	dd	dd	dd	dd	dd	dd	dd	dd	dd	dd	dd	dd	dd	dd	dd	dd	dd	dd	dd	dd	dd	dd	dd	dd	dd	dd	dd	AA	dd	dd	dd	dd	dd	dd	dd	AA	dd	dd	dd	dd	dd
chr1D	1973501	1979000	5500	dd	dd	dd	dd	dd	dd	dd	dd	dd	dd	dd	dd	dd	dd	dd	dd	dd	dd	dd	dd	dd	dd	dd	dd	dd	dd	dd	dd	dd	dd	dd	dd	AA	dd	dd	dd	dd	dd	dd	dd	AA	dd	dd	dd	dd	dd
chr1D	1996001	2045000	49000	dd	dd	dd	dd	dd	dd	dd	dd	dd	dd	dd	dd	dd	dd	dd	dd	dd	dd	dd	dd	dd	dd	dd	dd	dd	dd	dd	dd	dd	dd	dd	dd	Ad	dd	dd	dd	dd	dd	dd	dd	Ad	dd	dd	dd	dd	dd
chr1D	2161501	2169500	8000	AA	AA	AA	AA	AA	AA	AA	AA	AA	AA	AA	AA	AA	AA	AA	dd	AA	AA	AA	AA	dd	AA	dd	AA	AA	AA	AA	AA	AA	AA	dd	dd	AA	AA	AA	AA	AA	AA	AA	AA	AA	AA	AA	AA	AA	dd
chr1D	2188001	2218500	30500	AA	AA	AA	AA	AA	AA	AA	AA	AA	AA	AA	AA	AA	AA	AA	dd	AA	AA	AA	AA	dd	AA	dd	AA	AA	AA	AA	AA	AA	AA	dd	dd	AA	AA	AA	AA	AA	AA	AA	AB	AA	AA	AA	AA	AA	dd
chr1D	2341501	2361500	20000	AA	AA	AA	AA	AA	AA	AA	AA	AA	AA	AA	AA	AA	AA	AA	Ad	AA	AA	AA	AA	dd	AA	AA	AA	AA	dd	AA	AA	AA	AA	AA	AA	AA	AA	AA	AA	AA	AA	AA	AA	AA	AA	AA	AA	AA	AA
chr1D	2394501	2399500	5000	AA	AA	AA	AA	AA	AA	AB	AA	AA	AA	AA	AA	AA	AB	AA	AA	AB	AA	AA	AB	dd	AA	AA	AB	AA	dd	AA	AA	AA	AA	AA	AA	AB	AB	AA	AA	AA	AA	AA	AA	AA	AA	AA	AA	AA	AA
chr1D	2406501	2630500	224000	AA	AA	AA	AA	AA	AA	AA	AA	AA	AA	AA	AA	AA	AA	AA	AA	AA	AA	AA	AA	dd	AA	AA	AA	AA	dd	AA	AA	AA	AA	AA	AA	AA	AA	AA	AA	AA	AA	AA	AA	AA	AA	AA	AA	AA	AA
chr1D	2702501	2709500	7000	AA	Ad	AA	AA	AA	Ad	AA	Ad	Ad	AA	dd	dd	Ad	AA	Ad	Ad	AA	Ad	AA	AA	dd	AA	Ad	AA	AA	Ad	AA	Ad	AA	AA	Ad	Ad	Ad	AA	AA	Ad	AA	Ad	AA	Ad	AA	Ad	Ad	AA	Ad	Ad
chr1D	2730501	2744000	13500	Ad	dd	AA	AA	AA	AA	AA	Ad	dd	AA	dd	dd	dd	AA	dd	dd	AA	dd	AA	AA	dd	AA	dd	AA	AA	dd	AA	Ad	AA	AA	dd	dd	AA	AA	AA	dd	AA	AA	AB	AA	AA	AA	dd	AA	AA	dd
chr1D	2755501	2760000	4500	dd	dd	AA	AA	AA	AA	AA	dd	dd	AA	dd	dd	dd	AA	dd	dd	AA	dd	AA	AA	dd	AA	dd	AA	AA	dd	AA	Ad	Ad	AA	dd	dd	AA	AA	AA	dd	AA	AA	AA	AA	AA	AA	dd	AA	AA	dd
chr1D	2787001	2792000	5000	dd	dd	AA	AA	Ad	AA	AA	dd	dd	AA	dd	dd	dd	AA	dd	dd	AA	dd	AA	AA	dd	AB	dd	AA	AA	dd	AA	AA	AA	AA	dd	dd	AA	AA	AA	dd	AA	AA	AA	AA	AA	AA	dd	AA	AA	dd
chr1D	2794001	2798500	4500	dd	dd	AB	AA	AA	AA	AA	dd	dd	AA	dd	dd	dd	AB	dd	dd	AA	dd	AA	AA	dd	AB	dd	AA	AA	dd	AA	AA	AA	AB	dd	dd	AA	AA	AA	dd	AA	AA	AA	AB	AA	AA	dd	AA	AA	dd
chr1D	2815001	2827500	12500	dd	dd	AA	AA	AA	AA	AA	dd	dd	AA	dd	dd	dd	AA	dd	dd	AA	dd	AA	AA	dd	AA	dd	AA	AA	dd	AA	AA	AA	AA	dd	dd	AA	AA	AA	dd	AA	AA	AA	AA	AA	AA	dd	AA	AA	dd
chr1D	2849001	2854000	5000	dd	dd	AA	AA	AA	AA	Ad	dd	dd	Ad	dd	dd	dd	AA	dd	dd	AA	dd	AA	AA	dd	AA	dd	AA	AA	dd	AA	Ad	AA	AA	dd	dd	AA	Ad	AA	dd	AA	AA	AA	AA	AA	AA	dd	AA	AA	dd
chr1D	2865001	2872500	7500	dd	dd	Ad	Ad	Ad	Ad	Ad	dd	dd	Ad	dd	dd	dd	Ad	dd	dd	Ad	dd	Ad	Ad	dd	Ad	dd	Ad	Ad	dd	Ad	Ad	Ad	Ad	dd	dd	Ad	Ad	Ad	dd	Ad	dd	Ad	Ad	Ad	Ad	dd	Ad	dd	dd
chr1D	2897001	2901500	4500	dd	dd	AA	AA	AA	AA	AB	dd	dd	AA	dd	dd	dd	AA	dd	dd	AB	dd	AA	AB	dd	AB	dd	AA	AA	dd	AA	Ad	AA	AA	dd	dd	BC	AA	AA	dd	AA	Ad	AA	AA	AA	AA	dd	AA	AA	dd
chr1D	2914001	2938500	24500	dd	dd	AA	AA	AA	AA	AA	Ad	dd	AA	dd	dd	dd	AA	dd	dd	AA	dd	AA	AA	dd	AA	dd	AA	AA	dd	AA	Ad	AA	AA	dd	dd	AB	AA	AA	dd	AA	Ad	AA	AA	AA	AA	dd	AA	AA	dd
chr1D	2927001	2938500	11500	dd	dd	AA	AA	AA	AA	AA	Ad	dd	AA	dd	dd	dd	AA	dd	dd	AA	dd	AA	AA	dd	AA	dd	AA	AA	dd	AA	Ad	AA	AA	dd	dd	AA	AA	AA	dd	AA	AA	AA	Ad	AA	Ad	dd	AA	Ad	dd
chr1D	3047501	3057500	10000	dd	Ad	AB	AA	AA	AA	AA	Ad	dd	AA	dd	dd	dd	AA	dd	dd	AA	dd	AA	AA	dd	AA	Ad	AA	AA	dd	AA	Ad	AA	AA	dd	Ad	AA	AA	AA	dd	AA	AA	AA	AB	AA	AB	dd	AA	AA	dd
chr1D	3085501	3090500	5000	dd	dd	dd	dd	dd	dd	dd	dd	dd	dd	dd	dd	dd	dd	dd	dd	dd	dd	dd	dd	dd	dd	dd	dd	dd	dd	dd	dd	dd	dd	dd	dd	AB	dd	dd	dd	dd	dd	dd	dd	AA	dd	dd	dd	dd	dd
chr1D	3156001	3166000	10000	AA	dd	AA	AA	AB	AB	AB	Ad	dd	AA	dd	dd	dd	AA	AA	dd	AB	dd	AA	AB	AA	AB	AB	dd	AB	AA	AA	AB	AB	AB	AA	dd	AB	AA	dd	dd	dd	AB	AA	dd	AA	AA	BB	AA	AB	AA
chr1D	3156501	3416000	259500	AA	AA	AA	AA	AA	AA	AA	AA	AA	AA	AA	AA	AA	AA	AA	AA	AA	AA	AA	AA	AA	AA	AA	AA	AA	AA	AA	AA	AA	AA	AA	AA	AA	AA	AA	AA	AA	AA	AA	AA	AA	AA	AA	AA	AA	AA
chr1D	3488501	3506000	17500	Ad	dd	Ad	Ad	Ad	Ad	dd	Ad	Ad	Ad	Ad	Ad	Ad	Ad	Ad	Ad	Ad	Ad	Ad	Ad	Ad	Ad	Ad	dd	dd	Ad	Ad	Ad	Ad	Ad	Ad	Ad	Ad	Ad	Ad	Ad	dd	Ad	Ad	Ad	Ad	Ad	dd	Ad	Ad	dd
chr1D	3538001	3545500	7500	AB	AB	AA	AA	AA	AA	AA	AB	AA	AA	AA	AA	AA	AA	AB	AA	AA	AA	AA	AA	AA	AA	AB	Ad	AA	AA	AB	AA	AA	AA	AB	AA	AB	AB	AA	AA	dd	AA	Ad	Ad	AA	AA	AA	AA	Ad	AA
chr1D	3557501	3564000	6500	AA	AA	AA	AA	Ad	AA	Ad	AA	AA	AA	AA	AA	AA	AA	Ad	AA	Ad	AA	AA	AA	AA	AA	AA	dd	Ad	Ad	AA	AA	AA	AA	Ad	AA	Ad	AA	AA	AA	Ad	Ad	Ad	AA	AA	AA	AA	Ad	Ad	Ad
chr1D	3566501	3578500	12000	AA	AB	AA	AA	AA	AA	AA	AA	AA	AA	AA	AA	AA	AA	AA	AA	AA	AA	AA	AA	AA	AA	AA	AA	AA	AA	AA	AA	AA	AA	AA	AA	AA	AA	AA	AA	AA	AA	AA	AA	AA	AA	AA	AA	AA	AA
chr1D	3594001	3598500	4500	Ad	AA	AA	Ad	AA	AA	AA	AA	AA	AA	AA	AA	AA	Ad	AA	AA	AA	AA	AA	AA	AA	AA	AA	dd	AA	AA	AA	Ad	AA	AA	AA	AA	AA	AA	AA	Ad	AA	AA	Ad	AA	AA	Ad	AA	Ad	Ad	AA
chr1D	3624501	3628500	4000	AA	AA	AA	AA	AA	AA	AA	AA	AA	AA	AA	AA	AA	AA	AA	dd	AA	AA	AA	AA	AB	AA	AA	dd	AA	AA	AA	AA	AA	AB	AA	AA	AA	AA	AB	AB	AA	AA	AA	AB	AA	AA	AA	AA	AA	AA
chr1D	3719001	3726500	7500	AA	AA	AA	AA	AA	AA	AA	AA	AA	AA	AA	AA	AA	AA	AA	dd	AA	AA	AA	AA	AA	AA	AA	dd	AA	AA	AA	AA	AA	AA	AA	Ad	AA	AA	AA	AA	dd	AA	AA	AA	AA	AA	AA	AA	AA	AA
chr1D	3743001	3756000	13000	AA	AA	AA	AA	AA	AA	AA	AA	AA	AA	AA	AA	AA	AA	AA	M	AA	AA	AA	AA	AA	AA	AA	M	AA	AA	AA	AA	AA	AA	AA	AA	AA	AA	AA	AB	dd	AA	AA	AB	AA	AA	AA	AA	AA	AA
chr1D	3776001	3782500	6500	Ad	Ad	Ad	AA	AA	AA	AA	Ad	Ad	AA	Ad	Ad	AA	Ad	Ad	dd	AA	AA	AA	AA	AA	AA	AA	dd	AA	AA	AA	Ad	AA	AA	AA	AA	Ad	Ad	Ad	Ad	dd	AA	AA	Ad	AA	Ad	AA	Ad	Ad	Ad
chr1D	3785001	3789000	4000	Ad	Ad	Ad	Ad	Ad	Ad	Ad	Ad	Ad	Ad	Ad	Ad	AA	Ad	AA	dd	AA	Ad	AA	Ad	Ad	Ad	Ad	dd	Ad	AA	Ad	AA	Ad	AA	Ad	AA	Ad	AA	AA	Ad	dd	AA	Ad	Ad	Ad	Ad	Ad	Ad	Ad	Ad
chr1D	3804501	3821000	16500	AA	Ad	AA	Ad	Ad	Ad	Ad	Ad	AA	Ad	Ad	Ad	Ad	Ad	Ad	dd	Ad	Ad	Ad	AA	Ad	Ad	Ad	dd	Ad	Ad	AA	Ad	Ad	Ad	Ad	Ad	Ad	Ad	Ad	Ad	dd	Ad	Ad	Ad	Ad	Ad	Ad	Ad	Ad	Ad
chr1D	3806501	3851500	45000	Ad	Ad	AA	Ad	Ad	Ad	Ad	Ad	AA	Ad	AA	Ad	Ad	Ad	Ad	dd	Ad	Ad	AA	Ad	AA	Ad	Ad	dd	AA	Ad	Ad	Ad	Ad	Ad	Ad	Ad	Ad	Ad	Ad	Ad	dd	Ad	AA	Ad	AA	Ad	Ad	Ad	Ad	Ad
chr1D	3827001	3952000	125000	AA	AA	AA	AA	AA	AA	AA	AA	AA	AA	AA	AA	AA	AA	AA	dd	AA	AA	AA	AA	AA	AA	AA	dd	AB	Ad	AA	AA	AA	AA	AA	AA	AA	AA	AA	AA	Ad	Ad	AA	AA	AA	AA	Ad	Ad	AA	Ad
chr1D	3954501	3965500	11000	Ad	AA	AA	AA	AA	AA	AA	AA	AA	AA	AA	AA	AA	AA	AA	Ad	AA	AA	AA	AA	AA	AA	AA	AA	AA	dd	AA	AA	Ad	AA	AA	AA	AA	AA	AA	AA	AA	AB	AA	AA	AA	AA	AA	AA	AA	AA
chr1D	60683501	60688500	5000	AB	AA	AA	AB	AA	AB	AA	AA	AA	AA	AA	AA	AA	AA	AA	AA	AA	AB	AA	AB	AA	AA	AA	AA	AA	dd	AB	AB	AB	AA	AA	AB	AB	AA	AA	AA	AA	AA	AA	AA	AA	AA	AB	AA	AA	AA
chr1D	60683501	60694500	11000	AA	AA	AA	AA	AA	AB	AA	AA	AA	AA	AA	AA	AA	AA	AA	AA	AA	AA	AA	AA	AA	AA	AA	AA	AA	dd	AA	AB	AB	AA	AA	AA	AB	AA	AA	Ad	AA	AB	AA	Ad	AA	AA	AA	AA	AA	AA
chr1D	60701001	60707500	6500	AA	AA	AA	AA	AA	AA	AA	AA	AA	AA	AA	AA	AA	AA	AA	AA	AA	AA	AA	AA	AA	AA	AA	AA	AA	Ad	AA	AA	AA	AA	AA	AA	AA	AA	AA	AA	AA	AA	AA	AA	AA	AA	AA	AA	AA	AA
chr1D	60733001	60742500	9500	AA	AA	AA	AA	AA	AA	AA	AA	AA	AA	AA	AA	AA	AA	AA	AA	AA	AA	AA	AA	AA	AA	AB	AA	AA	dd	AA	AB	AA	AA	AA	AA	AA	AA	AA	AA	AA	AA	AA	AA	AA	AA	AA	AA	AA	AA
chr1D	60771001	60797500	26500	AA	AA	AA	AA	AA	AA	AA	AA	AA	AA	AA	AA	AA	AA	AA	AA	AA	AA	AA	AA	AA	AA	AA	AA	AA	dd	AA	AA	AA	AA	AA	AA	AA	AA	AA	AA	AA	AA	AA	AA	AA	AA	AA	AA	AA	AA
chr1D	60823501	60831000	7500	AA	AA	AB	AB	AA	AA	AA	AA	AA	AA	AA	AA	AA	AA	AA	AA	AA	AA	AA	AA	AA	AA	AA	Ad	AA	dd	AA	AB	AA	AB	AA	AA	AB	AA	AB	AA	Ad	AA	AA	AA	AA	AA	AA	AA	AA	AA
chr1D	60861501	60867000	5500	AA	AA	Ad	AA	Ad	AA	Ad	AA	AA	AA	Ad	Ad	AA	AA	AA	Ad	Ad	Ad	Ad	AA	Ad	AA	Ad	Ad	Ad	dd	Ad	BB	AA	Ad	AA	AA	AA	AA	Ad	Ad	AA	AB	Ad	Ad	AA	Ad	Ad	AA	Ad	AA
chr1D	60988501	60996500	8000	AA	AA	AA	AA	AA	AA	AA	AA	AA	AA	AA	AA	AA	AA	AA	AA	AA	AA	AA	AA	AA	AA	AA	AA	AA	dd	AA	AA	AA	AA	AA	AA	AA	AA	AA	AA	AA	AA	AA	AA	AA	AA	AA	AA	AA	AA
chr1D	61060001	61073000	13000	AA	AA	AA	AA	AA	AA	AA	AA	AA	AA	AA	AA	AA	AA	AA	AA	AA	AA	AA	AA	AA	AA	AA	AA	AA	dd	AA	AA	AA	AA	AA	AA	AA	AA	AA	Ad	Ad	AA	AA	AA	AA	AA	AA	AA	AA	AA
chr1D	61318501	61325500	7000	AA	AA	AA	AA	AA	AA	AA	AA	AA	AA	Ad	Ad	AA	AA	AA	AA	AA	AA	Ad	AA	Ad	AA	AA	AA	Ad	dd	AA	AA	AA	AA	AA	AA	AA	AA	AA	Ad	AA	AA	Ad	Ad	Ad	Ad	AA	AA	Ad	AA
chr1D	61394001	61414000	20000	AA	AA	AA	AA	AA	AA	AA	AA	AA	AA	AA	AA	AA	AA	AA	AA	AA	AA	AA	AA	AA	AA	AA	AA	AA	dd	AA	AA	AA	AA	AA	AA	AA	AA	AA	Ad	AA	AA	AA	Ad	AA	AA	AA	AA	AA	AA
chr1D	61409501	61414000	4500	AA	AA	Ad	AA	AA	AA	AA	AA	AA	Ad	AA	AA	AA	AA	AA	AA	AB	AA	AA	AA	AA	AA	AA	Ad	Ad	dd	AA	AA	AB	AA	AA	AB	AA	AA	Ad	AA	AA	AA	AA	AA	AA	AA	AA	AA	Ad	AA
chr1D	61451001	61460500	9500	AA	AA	AA	AA	AA	AB	AA	AA	AA	AB	AA	AA	AA	AA	AA	AB	AA	AA	AA	AA	AA	AA	AA	AA	AA	dd	AA	AA	AA	AA	AA	AA	AA	Ad	AA	AA	AA	Ad	AA	AA	AA	AA	AA	AA	AA	AA
chr1D	61526501	61538000	11500	AA	AA	AA	AA	AA	AB	AA	AA	AA	AA	AA	AA	AA	AA	AA	AA	AA	AA	AA	AA	AA	AA	AA	AB	Ad	dd	AA	AB	AA	AB	AB	AA	AA	AA	AA	Ad	AA	AB	AA	AA	AA	AA	AA	AA	AA	AA
chr1D	61575001	61579500	4500	AA	AA	AA	AA	AA	AA	Ad	AA	AA	AA	AA	AB	AA	AA	AA	AA	AA	AA	AA	AA	AA	AA	AA	AA	AA	dd	AA	AA	AA	AA	AA	AA	AA	AA	AA	Ad	AA	AA	Ad	AA	AA	Ad	Ad	Ad	Ad	AA
chr1D	61615001	61621500	6500	AA	AA	AA	AA	AA	AA	AA	AA	AA	AA	AA	AA	AA	AA	AA	AA	AA	AA	AA	AA	AA	AA	AA	AA	AA	Ad	AA	AA	AA	AA	AA	AA	AA	AA	AA	AB	dd	Ad	AA	AA	AA	AA	Ad	AA	AA	AA
chr1D	61641501	61666500	25000	AA	AA	AA	AA	AA	AA	AA	AA	AA	AA	AA	AA	AA	AA	AA	AA	AA	AA	AA	AA	AA	AA	AA	AA	AA	dd	AA	AA	AA	AA	AA	AA	AA	AA	AA	AA	AA	AA	AA	Ad	AA	AA	AA	AA	AA	AA
chr1D	61765501	61770500	5000	AA	AA	Ad	AA	AA	AA	AA	AB	AA	AA	AA	Ad	AA	AA	AA	AA	AA	AA	AB	AA	AA	AA	AA	AB	AA	dd	AA	AA	AA	AA	AA	AA	AA	AB	Ad	AA	AA	AA	AB	AA	AA	AA	AA	AB	AA	AA
chr1D	61799001	61807000	8000	AA	AA	AA	AA	AA	AA	AA	AA	AA	AA	AA	AA	AA	AA	AA	AA	AA	AA	AA	AA	AA	AA	AA	AA	AA	dd	AA	AA	AA	AA	AA	AA	AA	AA	AA	AB	AA	Ad	Ad	AA	AA	AA	Ad	Ad	Ad	AA
chr1D	61865001	61869000	4000	AA	AA	AA	AA	AA	AA	AA	AA	AA	AA	AB	AA	AA	AA	AA	AA	AA	AA	AA	AA	AA	AA	AA	AA	AA	dd	AA	AA	AA	AA	AA	AA	AA	AA	AA	AA	AA	AA	AA	AA	AA	AA	AA	AA	AA	AA
chr1D	61917001	61933000	16000	AA	AA	AA	AA	AA	AA	AA	AA	AA	AA	AA	AA	AA	AA	AA	AA	AA	AA	AA	AA	AA	AA	AA	AA	AA	dd	AA	AA	AA	AA	AA	AA	AA	AA	AA	AA	AA	Ad	Ad	AA	AA	Ad	Ad	AA	AA	AA
chr1D	62289001	62294000	5000	AA	AA	AA	AA	AA	AA	dd	AA	AA	AA	AA	Ad	AA	AA	AA	AA	AA	AA	AA	AA	Ad	AA	AA	AA	AA	dd	AA	AA	AA	AA	AA	AA	Ad	AA	AA	AA	AA	AB	AA	AA	AA	AA	AA	AA	AA	AA
chr1D	62393001	62399000	6000	Ad	AA	AA	AA	AA	Ad	Ad	Ad	Ad	Ad	Ad	Ad	Ad	Ad	Ad	Ad	Ad	Ad	AA	Ad	dd	AA	Ad	AA	Ad	dd	Ad	Ad	Ad	AA	AA	Ad	Ad	Ad	Ad	Ad	AA	Ad	Ad	Ad	AA	Ad	Ad	Ad	Ad	Ad
chr1D	62497001	62502500	5500	AA	AA	AA	AA	AA	AA	AA	AA	AA	AA	dd	AA	AA	AA	Ad	AA	AA	AA	AA	AA	AA	AA	AA	AA	AA	dd	AA	AA	Ad	AA	AA	AB	AA	AA	AA	Ad	AA	AB	AA	AA	AA	AA	AA	AA	AA	AA
chr1D	62580001	62593500	13500	AA	AA	AA	Ad	Ad	AA	AA	AA	Ad	AA	Ad	AA	Ad	Ad	AA	AA	Ad	Ad	Ad	AA	AA	AA	Ad	Ad	Ad	dd	Ad	AA	AA	AA	Ad	Ad	Ad	AA	Ad	Ad	AA	Ad	Ad	Ad	Ad	Ad	Ad	Ad	Ad	Ad
chr1D	62707501	62717000	9500	AA	AA	AA	AA	AA	AA	AA	AA	AA	AA	AA	Ad	AA	Ad	AA	AA	AA	AA	Ad	AA	AA	AA	Ad	Ad	AA	dd	AA	AA	AA	AA	AA	AA	Ad	AA	Ad	AA	Ad	Ad	Ad	AA	AA	Ad	AA	Ad	Ad	AA
chr1D	62820001	62834000	14000	AA	AA	AA	AA	AA	AA	AA	AA	AA	AA	AA	AA	AA	AA	AA	AA	AA	AA	AA	AA	AA	AA	AA	AA	AA	dd	AA	AA	AA	AA	AA	AA	AA	AA	AA	AA	AA	Ad	Ad	AA	AA	AA	Ad	Ad	Ad	Ad
chr1D	62904501	62909000	4500	AA	AA	Ad	AA	AA	AB	Ad	AA	AA	AA	AA	AA	AA	AA	AA	AA	AA	Ad	AA	AA	AA	AA	AA	AA	Ad	dd	AA	Ad	AA	AA	AA	AA	AA	AA	AA	AA	Ad	Ad	Ad	AA	AA	AA	Ad	Ad	AA	Ad
chr1D	62911001	62915000	4000	AA	AA	AA	AA	AA	AA	AA	AA	AA	AA	AA	AA	AA	AA	AA	AA	AB	AA	AA	AA	AA	AA	AA	AA	AA	dd	AA	AA	AA	AA	AA	AA	AA	AA	AA	AA	AA	AA	AA	AA	AA	AA	Ad	AA	AA	Ad
chr1D	63981501	63985500	4000	AA	AA	AA	AA	AA	AA	AA	AA	AA	AA	AA	AA	AA	AA	AA	AA	AA	AA	AA	AA	AA	AA	AA	AA	AA	Ad	AA	AA	AA	AA	AA	AA	AA	AA	AA	AA	dd	AA	AA	Ad	AA	AA	AA	AA	AA	AA
chr1D	63987001	63992500	5500	AA	Ad	AA	AA	AA	AA	AA	AA	AA	AA	AA	AA	AA	AA	AA	AA	AA	AA	AA	AA	AA	AA	AA	Ad	AA	AA	AA	AA	AA	AA	Ad	AA	AA	AA	AA	AA	dd	AA	AA	Ad	AA	Ad	AA	Ad	AA	AA
chr1D	64050501	64057000	6500	AA	AA	AA	AA	AA	AA	AA	AA	AA	AA	AA	AA	AA	AA	AA	AA	AA	AA	AA	AA	AA	AA	AA	AA	AA	AA	AA	AA	AA	AA	AA	AA	AA	AA	AA	Ad	dd	AA	AA	Ad	AA	AA	AA	AA	AA	AA
chr1D	64050501	64069000	18500	AA	AA	AA	AA	AA	AA	AA	AA	AA	AA	AA	AA	AA	AA	AA	AA	AA	AA	AA	AA	AA	AA	AA	AA	AA	AA	AA	AA	AA	AA	AA	AA	AA	AA	AA	AA	dd	AA	AA	Ad	AA	AA	AA	AA	AA	AA
chr1D	64078501	64083000	4500	AA	AA	AA	AA	AA	AA	AA	AA	AA	AA	AA	AA	AA	AA	AA	AA	AA	AA	AA	AA	AA	AA	AA	AA	AA	AA	AA	AA	AA	AA	AA	AA	AA	AA	AA	AA	Ad	Ad	AA	AA	AA	AA	AA	Ad	AA	AA
chr1D	64173001	64177500	4500	AA	Ad	Ad	Ad	Ad	Ad	Ad	Ad	Ad	AA	Ad	Ad	Ad	Ad	Ad	Ad	Ad	Ad	Ad	Ad	AA	Ad	Ad	Ad	Ad	Ad	Ad	Ad	Ad	Ad	AA	AA	Ad	Ad	Ad	Ad	dd	Ad	Ad	Ad	Ad	Ad	Ad	Ad	Ad	Ad
chr1D	64440001	64490500	50500	AA	AA	AA	AA	AA	AA	AA	AA	AA	AA	AA	AA	AA	AA	AA	AA	AA	AA	AA	AA	AA	AA	AA	AA	AA	AA	AA	AA	AA	AA	AA	AA	AA	AA	AA	AA	dd	AA	AA	AA	AA	AA	AA	AA	AA	AA
chr1D	64588001	64592500	4500	AA	AA	AA	AA	AA	AA	AA	AA	AA	AA	Ad	AA	AA	AA	AA	AA	AA	AA	AA	AA	AA	AA	Ad	AA	AA	AA	AA	AA	AA	Ad	AA	AA	AA	AA	Ad	Ad	dd	AB	Ad	Ad	AA	AA	AA	AA	AA	AA
chr1D	64595501	64615500	20000	AA	AA	Ad	AA	AA	AA	AA	AA	AA	AA	Ad	Ad	AA	AA	AA	AA	AA	AA	AA	AA	AA	AA	AA	AA	AA	AA	AA	AB	AA	AA	AA	AA	AA	AB	AA	Ad	dd	AA	AA	Ad	AA	Ad	Ad	AA	Ad	Ad
chr1D	64818001	64829000	11000	AA	AA	AA	AA	AA	AA	AA	AA	AA	AA	AA	AA	AA	AA	AA	AA	AA	AA	AA	AA	AA	AA	AA	AA	AA	AA	AA	AB	AA	AA	AA	AA	AA	AA	AA	Ad	dd	AA	AA	Ad	AA	AA	AA	AA	AA	AA
chr1D	64861001	64867000	6000	AA	AA	Ad	AA	AA	AB	AA	AA	AA	AA	AA	AA	AA	AA	AA	AA	AA	AA	AA	AA	AA	AA	AA	AA	AA	AA	AA	AA	AA	Ad	AA	AA	AA	AA	AA	Ad	dd	AA	AA	Ad	AA	AA	AA	AA	Ad	AA
chr1D	64962001	64975000	13000	AA	AA	AA	AA	AA	AA	AA	AA	AA	AA	AA	AA	AA	AA	AA	Ad	AA	AA	AA	AA	AA	AA	AA	AA	AA	AA	AA	AB	AA	AA	AA	AA	AA	AA	AA	Ad	dd	AA	AA	Ad	AA	Ad	AA	AA	AA	Ad
chr1D	65055001	65059000	4000	AA	AA	AA	AA	AA	AA	AB	AA	AA	AB	AA	AA	AB	AA	AB	AA	AA	AA	AA	AA	AA	AA	AA	AA	AA	AA	AA	AA	AA	AA	AA	AA	AA	AA	AA	AA	dd	AA	AA	AA	AA	AA	AA	AA	AA	AB
chr1D	65134501	65141000	6500	AA	AA	AA	AA	AA	AA	AA	AA	AA	AA	AA	AA	AA	AA	AA	AA	AA	AA	AA	AA	AA	AA	AA	AA	AA	AA	AA	AA	AA	AA	AA	AA	AA	AA	AA	Ad	dd	AA	AA	Ad	AA	AA	AA	Ad	Ad	AA
chr1D	65410001	65423500	13500	AA	AA	AA	AA	AA	AA	AA	AA	AA	AA	AA	AA	AA	AA	AA	AA	AA	AA	AA	AA	AA	AA	AA	AA	AA	AA	AA	AA	AA	AA	AA	AA	AA	AA	AA	Ad	dd	AA	Ad	Ad	AA	AA	AA	AA	AA	Ad
chr1D	65455001	65463000	8000	AA	AA	AA	AA	AA	AA	AA	AA	AA	AA	AA	AA	AA	AA	AA	AA	AA	AA	AA	AA	AA	AA	AA	AA	AA	AA	AA	AA	AA	AA	AA	AA	AA	AB	AA	AA	dd	AA	AA	AA	AA	AA	AA	AA	AA	AA
chr1D	65467001	65474500	7500	AA	AB	AA	AA	AA	AA	AA	AA	AA	AA	AA	AA	AA	AA	AA	AA	AA	AA	AA	AA	AA	AA	AA	AA	AA	AA	AA	AA	AA	AA	AA	AA	AA	AA	AA	Ad	dd	AA	AA	AA	AA	AA	AA	AA	Ad	Ad
chr1D	65553001	65559500	6500	AA	AA	AA	AA	AA	AA	AA	AA	AA	AA	AA	AA	AA	AA	Ad	AA	AA	AA	AA	AA	AA	AA	Ad	AA	AA	AA	Ad	AA	AA	AA	AA	AA	AA	AA	AA	Ad	dd	Ad	AA	Ad	AA	AA	AA	Ad	AA	AA
chr1D	65654501	65671500	17000	AA	AA	AA	AA	AA	AA	AA	AA	AA	AA	AA	AA	AA	AA	AA	Ad	AA	AA	AA	AA	AA	AA	AA	AA	AA	AA	AA	AA	AA	AA	AA	AA	AA	AA	AA	Ad	dd	Ad	Ad	Ad	AA	Ad	Ad	Ad	Ad	Ad
chr1D	65989501	65999000	9500	AA	AA	AA	AA	AA	AA	AA	AA	AA	AA	Ad	AA	AA	Ad	AA	Ad	AA	AA	AA	AA	AA	AA	AA	AA	AA	AA	AA	AA	AA	AA	AA	AA	AA	AA	Ad	Ad	dd	Ad	Ad	Ad	AA	Ad	Ad	Ad	Ad	Ad
chr1D	66005501	66009500	4000	AA	AA	AB	AA	AA	AB	AA	AB	AB	AB	AA	AA	AA	AB	AA	AB	AA	AA	AA	AB	AB	AA	AA	AA	AA	AB	AB	AA	AA	AB	AB	AA	AB	AA	AA	AA	dd	Ad	AA	AA	AA	AA	AA	AA	AA	AA
chr1D	66027001	66033000	6000	AA	AA	AA	AA	AB	AA	AA	AA	AB	AA	AA	AA	AA	AB	AA	AA	AA	AA	AA	AA	AA	AA	AA	AA	AA	AA	AA	AA	AA	AA	AA	AA	AA	AA	AA	Ad	dd	AA	Ad	Ad	AA	AA	AA	AA	AA	AA
chr1D	66164001	66174500	10500	AA	AA	AA	AA	AA	AA	AA	AA	AA	AA	AA	AA	AA	AA	AA	AA	AA	AA	AA	AA	AA	AA	AA	AA	AA	AA	AA	AA	AA	AA	AA	AA	AA	AB	AA	Ad	dd	AA	Ad	Ad	AA	Ad	AA	AA	AA	AA
chr1D	66230501	66239000	8500	AA	AA	AA	AA	AA	AA	AA	AA	AA	AA	AA	AA	AA	AA	AA	AA	AA	AA	AA	AA	AA	AA	AA	AA	AA	AA	AA	AB	AA	AA	AA	AA	AA	AA	AA	AA	dd	AA	AA	AA	AA	AA	AA	AA	AA	AA
chr1D	66230501	66276000	45500	AA	AA	AA	AA	AA	AA	AA	AA	AA	AA	AA	AA	AA	AA	AA	AA	AA	AA	AA	AA	AA	AA	AA	AA	AA	AA	AA	AA	AA	AA	AA	AA	AA	AA	AA	AA	dd	AA	AA	AA	AA	AA	AA	AA	AA	AA
chr1D	66306501	66311000	4500	AA	Ad	Ad	AA	Ad	AA	AA	AA	AA	AA	AA	AA	AA	AA	AA	Ad	Ad	AA	AA	AA	Ad	AA	AA	Ad	AA	AA	Ad	AA	AA	AA	AA	AA	AA	AA	AA	Ad	dd	AA	Ad	Ad	AA	Ad	Ad	Ad	Ad	Ad
chr1D	66341501	66345500	4000	AA	AA	AA	AA	AA	AA	AA	AA	AA	Ad	Ad	AA	Ad	Ad	Ad	AA	AA	AA	AA	AA	AA	AA	AA	AA	Ad	AA	AA	AA	AA	AA	AA	AA	AA	AA	AA	Ad	dd	Ad	Ad	Ad	AA	Ad	Ad	Ad	AA	AA
chr1D	66441501	66449000	7500	AA	AA	AA	AA	AA	AA	AA	AA	AA	AA	AA	AA	AA	AA	AA	AA	AA	AA	AA	AA	AA	AA	AA	AA	AA	AA	AA	AA	AA	AA	AA	AA	AA	AA	AA	AA	dd	Ad	AA	Ad	AA	Ad	AA	Ad	AA	Ad
chr1D	66509501	66514500	5000	AA	AA	AA	AA	AB	AA	AA	AA	AA	AB	AA	AB	AA	AA	AA	AA	AA	AA	AA	AA	AA	AA	AA	AA	AA	AA	AA	AA	AA	AA	AA	AA	AA	AA	AA	AA	dd	AA	AA	AA	AA	AA	AA	AA	AA	AA
chr1D	66876501	66883000	6500	AB	AA	AA	AB	AB	AA	AB	AB	AA	AA	AA	AB	AB	AA	AA	AB	AA	AA	AA	AB	AA	AA	AB	AA	AA	AA	AA	AA	AA	AA	AA	AA	AB	AA	AA	Ad	dd	AA	AA	AA	AA	AA	AA	AA	AA	AA
chr1D	66885501	66890500	5000	Ad	Ad	Ad	Ad	AA	AA	AA	Ad	Ad	Ad	Ad	Ad	AA	AA	Ad	Ad	Ad	Ad	AA	AA	Ad	AA	Ad	Ad	Ad	Ad	Ad	AA	Ad	AA	AA	AA	AA	AA	Ad	Ad	Ad	AA	AA	Ad	AA	AA	Ad	AA	Ad	AA
chr1D	66905001	66910500	5500	dd	dd	Ad	Ad	Ad	Ad	dd	dd	dd	Ad	Ad	dd	Ad	Ad	Ad	Ad	Ad	Ad	Ad	Ad	Ad	Ad	dd	Ad	Ad	Ad	Ad	Ad	dd	dd	Ad	Ad	Ad	Ad	dd	dd	dd	dd	dd	dd	Ad	dd	dd	dd	dd	dd
chr1D	67011501	67016000	4500	Ad	Ad	AA	Ad	Ad	Ad	Ad	AA	Ad	Ad	Ad	Ad	Ad	Ad	Ad	AA	Ad	Ad	Ad	Ad	Ad	AA	AA	AA	Ad	Ad	AA	AA	Ad	Ad	Ad	Ad	Ad	Ad	AA	Ad	dd	Ad	Ad	Ad	AA	Ad	Ad	Ad	AA	Ad
chr1D	67020501	67025500	5000	AA	AA	AA	AA	AB	AA	AA	AA	AA	AA	AA	AB	AA	AA	AA	AA	AA	AA	AA	AA	AA	AA	AA	AA	AA	AA	AA	AA	AA	AB	AA	AA	AA	AA	AA	AA	dd	AB	AA	AA	AA	AA	AA	AA	AA	AA
chr1D	67206501	67217500	11000	dd	Ad	Ad	Ad	Ad	Ad	Ad	Ad	Ad	Ad	Ad	Ad	Ad	Ad	Ad	Ad	Ad	Ad	Ad	Ad	Ad	Ad	Ad	Ad	Ad	Ad	Ad	Ad	Ad	Ad	Ad	Ad	Ad	Ad	Ad	Ad	dd	Ad	Ad	dd	Ad	Ad	Ad	Ad	Ad	Ad
chr1D	67241001	67247500	6500	AA	AA	AA	AA	AA	AA	AA	AA	dd	AA	Ad	Ad	AA	AA	Ad	dd	AA	AA	AA	Ad	Ad	AA	AA	Ad	AA	Ad	AA	AA	AA	AA	AA	Ad	AA	AA	AA	Ad	dd	Ad	Ad	Ad	AA	Ad	Ad	Ad	Ad	Ad
chr1D	67319501	67324500	5000	AA	Ad	Ad	AA	AA	AA	AA	AA	Ad	AA	Ad	Ad	AA	Ad	AA	Ad	Ad	AA	Ad	Ad	AA	AA	Ad	Ad	AA	Ad	AA	AB	Ad	AA	AA	Ad	AA	AA	Ad	Ad	dd	AA	AA	Ad	AA	Ad	AA	AA	Ad	AA
chr1D	67473001	67479500	6500	AA	AA	AA	AA	AA	AA	Ad	AA	Ad	AA	AA	Ad	Ad	Ad	AA	Ad	Ad	AA	Ad	AA	Ad	AA	AA	AA	Ad	Ad	Ad	Ad	AA	AA	AA	AA	AA	AA	Ad	Ad	dd	Ad	Ad	Ad	Ad	Ad	Ad	Ad	Ad	Ad
chr1D	67482001	67486500	4500	AA	Ad	AA	AA	AA	AA	AA	AA	AA	AA	AA	AA	AA	AA	AA	AA	AA	AA	dd	AA	AA	AA	AA	AA	AA	AA	AA	AA	AA	AA	AA	AB	AA	AA	AA	AA	dd	AB	AA	AA	AA	AA	AA	AA	AA	AA
chr1D	67484501	67492500	8000	Ad	AA	AA	AA	AA	AA	AA	AA	AA	AA	AA	AA	AA	AA	AA	AA	AA	AA	dd	AA	AA	AA	AA	AA	AA	AA	AA	AA	AA	AA	AA	AA	AA	AA	AA	AA	dd	AA	AA	AA	AA	AA	AB	AA	AA	AA
chr1D	67548001	67562000	14000	AA	AA	AA	AA	AA	AA	AA	AA	AA	AA	AA	AA	AA	AA	AA	AA	AA	AA	AA	AA	AA	AA	AA	AA	AA	AA	AA	AA	AA	AA	AA	AA	AA	AA	AA	AA	dd	AA	AA	AA	AA	AA	AA	AA	AA	AA
chr1D	67566001	67571000	5000	AA	Ad	AA	Ad	AA	Ad	Ad	AA	AA	AA	AA	Ad	AA	Ad	AA	AA	Ad	AA	Ad	AA	AA	Ad	Ad	AA	AA	AA	Ad	AA	AA	AA	AA	AA	AA	AA	Ad	Ad	dd	AA	AA	Ad	AA	AA	AB	AA	AA	AA
chr1D	67567501	67575500	8000	AA	AA	AA	AA	AA	AA	AA	AA	AA	AA	AA	AA	AA	AA	AA	AA	AA	AA	AA	AA	AA	AA	AA	Ad	AA	AA	AA	AA	AA	AA	AA	AA	AA	AA	AA	AA	dd	AA	AA	AA	AA	AA	AA	AA	AA	AA
chr1D	67706501	67711500	5000	Ad	AA	AA	AA	AA	AA	AA	AA	AA	AA	AA	AA	AA	AA	AA	AA	AA	AA	Ad	AA	AA	AA	AA	AA	AA	AA	AA	AA	AA	AA	AA	AA	AA	AA	AA	Ad	dd	AA	AA	AA	AA	AA	AA	AA	AA	AA
chr1D	67750501	67760000	9500	AA	AA	AA	AA	AA	AA	AA	AA	AA	AA	AA	AA	AA	AA	AA	AA	AA	AA	AA	AA	AA	AA	AA	AA	AA	AA	AA	AA	AA	AA	AA	AA	AA	AA	AA	AA	dd	AA	AA	AB	AA	AA	AA	AA	AA	AA
chr1D	67756001	67760000	4000	AA	AA	AA	AA	AA	AA	AA	AA	AA	AA	AA	AA	AB	AA	AA	AA	AB	AA	AA	AA	AA	AA	AA	AA	AA	AA	AB	AA	AA	AA	AA	AA	AA	AA	AA	Ad	dd	AA	AA	AA	AA	AA	AA	AA	AA	AA
chr1D	67767001	67794500	27500	AA	AA	AA	AA	AA	AA	AA	AA	AA	AA	AA	AA	AA	AA	AA	AA	AA	AA	AA	AA	AA	AA	AA	AA	AA	AA	AA	AA	AA	AA	AA	AA	AA	AA	AA	AA	dd	AA	AA	AA	AA	AA	AA	AA	AA	AA
chr1D	67835001	67840500	5500	AA	AB	AA	AA	AA	AA	AA	AA	AA	AA	AA	AB	AA	AA	AA	AA	AA	AA	AA	AB	AA	AA	AA	AA	AA	AA	AA	AA	AA	AA	AA	AA	AA	AA	AA	AA	dd	AA	AA	AA	AA	AA	AA	AA	AA	AA
chr1D	67931001	67936500	5500	AA	AA	AA	AA	AA	AA	AA	AA	AA	AA	AA	AA	AA	AA	AB	AA	AA	AA	AA	AA	AA	AA	AB	AA	AA	AA	AA	AA	AB	AA	AA	AA	AA	AA	AA	AA	dd	AA	AA	AA	AA	AA	AA	AA	AA	AA
chr1D	67999501	68003500	4000	AB	AA	AA	AA	AA	AA	AA	AA	AA	AA	AA	AB	AA	AA	AA	AB	AB	AA	AA	AA	AA	AB	AA	AA	AB	AA	AA	AA	AA	AA	AB	AA	AB	AA	AA	AA	dd	AA	AA	AA	AA	AA	AA	AA	AA	Ad
chr1D	68109001	68115000	6000	AA	AA	AA	AA	AA	AA	AA	Ad	AA	AA	AA	AA	AA	AA	AA	AA	AA	AA	AA	AA	AA	AA	AA	AA	AA	AA	AA	AA	AA	AA	AA	AA	AA	AA	AA	Ad	dd	AB	AA	AA	AA	AA	AA	AA	AA	AA
chr1D	68161001	68169000	8000	AA	AA	AA	AB	AA	AA	AA	AA	AA	AA	AB	AA	AB	AA	AB	AA	AA	AB	AA	AA	AB	AB	AA	AA	AA	AB	AB	AA	AB	AB	AA	AB	AA	AB	AA	BB	dd	AA	AA	AA	AA	AA	AA	AA	AA	AA
chr1D	68184501	68190500	6000	AA	AA	AA	AA	AA	AA	AB	AA	AA	AA	AA	AA	AA	AA	AA	AA	AA	AA	AA	AA	AA	AA	AA	AA	AA	AA	AA	AA	AA	AA	AA	AA	AA	AA	AA	AB	dd	AA	AA	AB	AA	AA	AA	AA	AA	AA
chr1D	68217501	68229500	12000	AA	AA	AA	AB	AA	AB	AA	AB	AA	AA	AB	AB	AA	AA	AA	AB	AA	AA	AA	AA	AA	AA	AA	AA	AA	AA	AA	AA	AA	AA	AB	AA	AA	AA	AA	AA	dd	AB	AB	AA	AA	AA	AB	AA	AA	AA
chr1D	68239501	68244500	5000	AA	AA	AA	AA	AA	AA	AA	AA	AA	AA	AA	AA	AA	AA	AA	AA	AA	Ad	AA	AA	AA	Ad	AA	AA	AA	AA	Ad	AA	AA	AA	AA	AA	AA	AA	AA	AB	dd	AA	AA	AB	AA	AA	Ad	AA	AA	AA
chr1D	68257001	68261500	4500	AA	AA	AA	AA	Ad	AA	AA	AA	AA	AA	AA	AA	AA	AA	AA	AA	AA	AA	AA	AA	AA	AA	AA	AA	AA	AA	AA	AA	AA	AA	AA	AA	AA	AA	AA	AA	dd	AA	AA	AA	AA	AA	AA	AA	AA	AA
chr1D	68403001	68411500	8500	AA	AA	AA	AA	AA	AA	AA	AA	AA	AA	AA	AA	AA	AA	AA	AA	AA	AA	AA	AA	AA	AA	AA	AA	AA	AA	AA	AA	AA	AA	AA	AA	AA	AA	AA	BB	dd	AA	AA	AB	AA	AA	Ad	AA	AA	AA
chr1D	68535501	68543000	7500	AA	AA	Ad	AA	AA	AA	AA	AA	AA	Ad	Ad	Ad	AA	AA	AA	AA	Ad	AA	Ad	AA	Ad	AA	AA	Ad	Ad	AA	AA	AB	AA	Ad	AA	AA	AA	AA	AA	Ad	dd	AA	Ad	Ad	AA	Ad	Ad	Ad	Ad	AA
chr1D	68554001	68561500	7500	AA	Ad	AA	AA	Ad	AA	AA	AA	Ad	AA	AA	Ad	AA	AA	AA	AA	AA	AA	AA	Ad	AA	AA	AA	AA	Ad	AA	AA	AA	Ad	AA	Ad	AA	AA	AA	AA	AA	dd	Ad	Ad	AA	AA	AA	Ad	AA	Ad	Ad
chr1D	68564001	68569000	5000	AA	AA	AA	AA	AA	AA	AA	AA	AA	AA	AA	AA	AA	AA	AA	AA	AA	AA	AA	AA	AA	AA	AA	AA	AA	AB	AA	AA	AA	AA	AA	AA	AA	AA	AA	AA	dd	AA	AA	AA	AA	AA	AA	AA	AA	AA
chr1D	68661001	68665000	4000	Ad	Ad	dd	Ad	Ad	Ad	Ad	Ad	Ad	Ad	Ad	Ad	dd	Ad	Ad	Ad	Ad	Ad	Ad	Ad	Ad	Ad	dd	dd	Ad	Ad	Ad	Ad	Ad	Ad	Ad	Ad	Ad	Ad	Ad	dd	Ad	dd	dd	dd	Ad	dd	dd	dd	dd	dd
chr1D	68664001	68671500	7500	AA	AA	AA	AA	AA	AA	AA	AA	AA	AA	Ad	Ad	AA	AA	AA	Ad	AA	AA	Ad	AA	AA	AA	AA	Ad	AA	AA	AA	AA	AA	AA	AA	AA	AA	AA	Ad	Ad	dd	Ad	Ad	Ad	Ad	Ad	Ad	Ad	Ad	Ad
chr1D	68795501	68804500	9000	AA	AA	AA	AA	AA	AA	AA	AA	AA	AA	AA	AA	AA	AA	AA	AA	AA	AA	AA	AA	AA	AA	AA	AA	AA	AA	AA	AA	AA	AA	AA	AA	AA	AA	AA	AA	dd	AA	AA	AA	AA	AA	AA	AA	AA	AA
chr1D	68873001	68881500	8500	Ad	Ad	Ad	Ad	Ad	Ad	Ad	dd	Ad	Ad	dd	Ad	Ad	Ad	Ad	Ad	Ad	Ad	Ad	dd	Ad	Ad	dd	dd	Ad	dd	Ad	Ad	Ad	Ad	Ad	Ad	Ad	Ad	Ad	dd	dd	dd	dd	dd	Ad	dd	dd	dd	dd	dd
chr1D	69137001	69145500	8500	Ad	Ad	AA	Ad	AA	AA	AA	Ad	Ad	Ad	Ad	Ad	Ad	Ad	Ad	AA	Ad	Ad	Ad	Ad	Ad	Ad	Ad	AA	AA	Ad	Ad	Ad	Ad	AA	AA	AA	Ad	Ad	Ad	Ad	dd	Ad	Ad	Ad	Ad	Ad	Ad	Ad	Ad	Ad
chr1D	69283501	69291500	8000	AA	AA	AA	AA	AA	AA	AA	AA	AA	AA	AA	AA	AA	AA	AA	Ad	AA	AA	AA	AA	AA	AA	Ad	AA	Ad	AA	AA	Ad	AA	AA	AA	AA	AA	AA	AA	AA	dd	Ad	Ad	Ad	AA	Ad	Ad	Ad	Ad	Ad
chr1D	69367501	69374500	7000	AA	AA	AA	Ad	AA	AA	AA	AA	AA	AA	AA	Ad	AA	AB	AA	AA	Ad	AA	AA	AA	AA	AA	AA	AA	AA	AA	AA	AA	AA	AB	AA	AA	AA	AA	AA	AA	dd	AA	Ad	Ad	AA	Ad	Ad	AA	AA	Ad
chr1D	69392001	69398000	6000	AA	AB	AA	AB	AA	AB	AB	AA	AA	AA	AB	AA	AA	AA	AA	AA	AB	AB	AA	AA	AA	AA	AB	AA	AA	AB	AA	AA	AB	AB	AB	AA	AB	AA	AA	AA	dd	AA	AA	AA	AA	AA	AA	AA	AA	AA
chr1D	69409001	69413500	4500	AA	AA	AA	AA	AA	AA	AA	AA	AB	AA	AA	AA	AA	AA	AA	AA	AA	AB	AA	AA	AB	AA	AA	AA	AA	AA	AA	AA	AA	AA	AA	AA	AA	AA	AB	Ad	dd	AA	Ad	Ad	AA	AA	AA	AA	AA	AA
chr1D	69938001	69942000	4000	AA	AA	AA	AA	AA	AA	AA	AA	AA	AA	AA	AA	AA	AA	AA	AA	AA	AB	AA	AA	AA	AA	AA	AA	AA	AA	AA	AA	AA	AA	AA	AA	AA	AB	AA	AA	Ad	AA	AA	AA	AA	AA	AA	AA	AA	AA
chr1D	70106001	70130000	24000	M	M	M	M	M	M	M	M	M	M	M	M	M	M	M	M	M	M	M	M	M	M	M	M	M	M	M	M	M	M	M	M	M	M	M	M	dd	M	M	M	M	M	M	M	M	M
chr1D	70542501	70551500	9000	AA	AA	AA	AA	AA	AA	AA	AA	AA	AA	AA	AA	AA	AA	AA	AA	Ad	AA	AA	AA	AA	AA	AA	AA	AA	AA	AA	AA	AA	AA	AA	AA	AA	AA	AA	Ad	dd	Ad	Ad	Ad	AA	Ad	Ad	AA	Ad	Ad
chr1D	70549001	70554000	5000	dd	Ad	dd	Ad	dd	dd	dd	dd	Ad	Ad	Ad	Ad	Ad	dd	Ad	dd	Ad	dd	Ad	Ad	dd	Ad	Ad	dd	Ad	dd	dd	dd	Ad	Ad	Ad	Ad	Ad	dd	dd	dd	dd	dd	dd	dd	Ad	dd	dd	dd	Ad	dd
chr1D	70554501	70560500	6000	AA	Ad	AA	AA	AA	AA	AA	AA	AA	AA	Ad	AA	Ad	Ad	AA	AA	Ad	AA	Ad	AA	AA	AA	AA	AA	Ad	AA	AA	Ad	Ad	AA	Ad	AA	AA	Ad	AA	Ad	dd	Ad	Ad	Ad	Ad	Ad	Ad	Ad	Ad	Ad
chr1D	70793501	70801000	7500	AA	AA	AA	AA	AA	AA	AA	AA	AA	AA	AA	AA	AA	AA	AA	AA	AA	AA	AA	AA	AA	AA	AA	AA	AA	AA	AB	AA	AA	AA	AA	AA	AA	AA	AA	Ad	dd	AA	AA	Ad	AA	AA	Ad	AA	Ad	Ad
chr1D	70909001	70913500	4500	Ad	AA	Ad	AA	Ad	AA	Ad	AA	AA	Ad	Ad	Ad	Ad	Ad	AA	Ad	Ad	AA	AA	AA	Ad	Ad	Ad	AA	Ad	Ad	AA	Ad	AA	AA	AA	AA	Ad	AA	Ad	Ad	dd	AA	AA	Ad	Ad	Ad	AA	AA	Ad	Ad
chr1D	70962001	70967000	5000	AA	AA	AA	AA	AA	AA	AA	AA	AA	AA	AA	AA	AA	AA	AA	AA	AA	AA	AA	AA	AA	AA	AA	AA	AA	AA	AA	AA	AA	AA	AA	AA	AB	AA	AA	AA	dd	AB	AA	Ad	AA	AA	AA	AA	AA	AA
chr1D	70973001	70979500	6500	AA	AA	AA	AA	AA	AB	AB	AA	AA	AB	AA	AA	AA	AA	AA	AA	AA	AA	AA	AA	AA	AA	AA	AA	AA	AA	AA	AA	AA	AB	AA	AA	AA	AB	AA	AB	dd	AA	AA	AA	AA	AA	AA	AA	AA	AA
chr1D	71017501	71028500	11000	AA	Ad	AA	AA	AA	AA	AA	AA	AA	Ad	Ad	AA	Ad	AA	AA	AA	AA	AA	AA	AA	AA	AA	AA	AA	AA	AA	AA	AA	AA	AA	AA	AA	AA	Ad	AA	AA	dd	Ad	Ad	Ad	AA	Ad	Ad	Ad	Ad	Ad
chr1D	71118501	71129500	11000	AA	AA	AA	AA	AA	AA	AA	AA	AA	AA	AA	AA	AA	AA	AA	AA	AA	AA	AA	AA	AA	AA	AA	AA	AA	AA	AA	AA	AA	AA	AA	AA	AA	AA	AA	Ad	dd	AA	AA	Ad	AA	AA	AA	AA	AA	AA
chr1D	71322001	71326000	4000	Ad	Ad	Ad	Ad	Ad	dd	Ad	AA	Ad	Ad	Ad	Ad	Ad	Ad	Ad	Ad	Ad	Ad	Ad	Ad	Ad	Ad	Ad	Ad	Ad	Ad	Ad	Ad	Ad	AA	Ad	AA	Ad	AA	Ad	Ad	dd	Ad	Ad	Ad	Ad	Ad	Ad	Ad	Ad	Ad
chr1D	71423001	71427000	4000	AA	AA	AA	AA	AA	AA	AA	AA	AA	AA	AA	AA	AA	AA	AA	AA	AA	AA	AA	AA	AA	AA	AA	AA	AA	AA	AA	AA	AA	AA	AA	AA	AA	AA	AA	Ad	dd	AB	AA	AA	AA	AA	AA	AA	AA	AA
chr1D	71510001	71514500	4500	AA	AA	AB	AA	AA	AB	AA	AA	AA	AA	AA	AA	AA	AA	AA	AA	AA	AA	AA	AA	AA	AA	AA	AA	AA	AA	AA	AB	AA	AA	AA	AA	AA	AB	AA	AA	AA	AA	AA	AA	AA	AA	AB	AA	AA	AA
chr1D	71623001	71631000	8000	AA	AA	AA	AA	AA	AA	AA	AA	AA	AA	AA	AA	AA	AA	AA	AA	AA	Ad	AA	AA	AA	AA	AA	AA	AA	AA	AA	AA	AA	AA	Ad	AA	AA	AA	AA	AA	dd	Ad	AA	AA	AA	AA	Ad	AA	AA	Ad
chr1D	71811001	71816500	5500	AB	AA	AA	AB	AA	AA	AA	AA	AA	AA	AA	AA	AA	AA	AA	AA	AB	AA	AA	AA	AA	AA	AA	AA	AB	AB	AA	AB	AA	AA	AA	AA	AA	AA	AB	AA	dd	AA	AA	AA	AA	AA	AB	AA	AA	AB
chr1D	71811001	71823500	12500	AB	AA	AB	AA	AA	AA	AA	AA	AB	AA	AA	AA	AA	AA	AA	AA	AB	AA	AA	AA	AA	AA	AA	AA	AB	AB	AA	AB	AA	AA	AA	AA	AA	AA	AB	AA	dd	AA	AA	AA	AA	AA	AB	AA	AA	AB
chr1D	71871501	71893000	21500	AA	AA	AA	AA	AA	AA	AA	AA	AA	AA	AA	AA	AA	AA	AA	AA	AA	AA	AA	AA	AA	AA	AA	AA	AA	AA	AA	AA	AA	AA	AA	AA	AA	AA	AA	Ad	dd	AB	AA	AA	AA	AA	AA	AA	AA	AA
chr1D	71936501	71942000	5500	AA	AA	AA	AA	AA	AA	AA	AA	AA	AA	AA	AA	AA	AA	AA	AA	AA	AA	AA	AA	AA	AA	AA	AA	AA	AA	AA	AA	AA	AA	AB	AA	AA	AA	AA	AA	dd	Ad	AA	Ad	AA	AA	AA	AA	AA	AA
chr1D	71976501	71997500	21000	AA	AA	AA	AA	AA	AA	AA	AA	AA	AA	AA	AA	AA	AA	AA	AA	AA	AA	AA	AA	AA	AA	AA	AA	AA	Ad	AA	AA	AA	AA	AA	AA	AA	AA	AA	AA	dd	AA	AA	AA	AA	AA	AA	AA	AA	AA
chr1D	72000001	72004000	4000	AA	AA	AA	AA	AB	AA	AB	AA	AA	AA	AA	AA	AA	AA	AA	AA	AA	AA	AA	AA	AA	AB	AA	AB	AB	AA	AA	AA	AA	AA	AA	AA	AA	AA	AA	AA	dd	AA	AA	AA	AA	AA	AA	AA	AA	AB
chr1D	72210501	72215000	4500	AA	AA	AA	AA	AA	AA	AB	AA	AA	AA	AA	AA	AA	AA	AA	AA	AA	AA	AA	AB	AA	AA	AA	AA	Ad	AA	AA	AA	AA	AA	AA	AA	AA	AA	AA	AA	dd	AB	AA	AA	AA	Ad	AA	AA	Ad	AA
chr1D	72210501	72223000	12500	AA	AA	AA	AA	AA	AB	AB	AA	AA	AA	AA	AA	AA	AA	AA	AA	AA	AA	AA	AB	AA	AB	AA	AA	AA	AA	AA	AA	AA	AA	AA	AA	AA	AA	AA	AA	dd	AA	AA	AA	AA	AA	AA	AA	AA	AA
chr1D	72350001	72361000	11000	AA	AA	AA	AA	AA	AA	AA	AA	AA	AA	AA	AA	AA	AB	AA	AA	AA	AA	AA	AA	AA	AA	AA	AA	dd	AA	AA	AA	AA	AA	AA	AA	AA	AA	AA	AA	AA	AB	AA	AA	AA	AA	AA	AA	AA	AA
chr1D	72366001	72402500	36500	AA	AA	AA	AA	AA	AA	AA	AA	AA	AB	AA	AA	AB	AA	AA	AA	AA	AA	AA	AA	AA	AB	AA	AA	dd	AA	AA	AB	AA	AA	AA	AA	AA	AA	AA	AA	AA	AA	AA	AA	AA	AA	AA	AA	AA	AA
chr1D	72478501	72492000	13500	Ad	AA	AA	Ad	Ad	Ad	AA	AA	Ad	Ad	AA	Ad	Ad	Ad	Ad	Ad	AA	Ad	Ad	Ad	AA	AA	AA	AA	AA	Ad	AA	Ad	Ad	Ad	Ad	Ad	AA	Ad	Ad	Ad	dd	Ad	Ad	Ad	AA	Ad	Ad	Ad	Ad	Ad
chr1D	72508501	72512500	4000	AA	AA	AA	AA	AA	AA	AA	AA	AA	AA	AA	AA	AA	AA	AA	AA	AB	AA	AA	AA	AA	AA	AA	AA	AA	AA	AA	AA	AA	AA	AA	AA	AA	AA	AB	AB	dd	Ad	AA	AA	AA	AA	AA	AA	AA	AA
chr1D	72527001	72542500	15500	AA	AA	AA	AA	AA	AA	AA	AA	AA	AA	AA	AA	AA	AA	AA	AA	AA	AA	AA	AA	AA	AA	AA	AA	AA	AA	AA	AA	AA	AA	AA	AA	AA	AA	AA	Ad	dd	AA	Ad	Ad	AA	Ad	AA	Ad	Ad	AA
chr1D	72639001	72644500	5500	AA	AA	AA	AA	AA	AA	Ad	AA	AA	AA	AA	AA	AA	AA	AA	AA	Ad	AA	AA	AA	AA	AA	AA	AA	AA	AA	AA	AA	AA	AA	AA	AA	Ad	AA	AB	AB	dd	AA	AA	AA	AA	AA	AB	AA	AA	AB
chr1D	72652501	72656500	4000	AA	AA	AA	AA	AA	AA	AA	AA	AA	AA	AA	AA	AA	AA	AA	AA	AA	AA	AA	AA	AA	AA	AA	AA	AA	AA	AA	AA	AA	AA	AA	AA	AA	AA	AA	Ad	dd	AA	AA	AA	AA	AA	AA	AA	AA	AA
chr1D	72667501	72672500	5000	AA	AA	AA	AA	AA	AA	AA	AA	AA	AA	AA	AA	AA	AA	AA	AA	AA	AA	AA	AA	AA	AA	AA	AA	AA	AA	AA	AA	AA	AA	AA	AA	AA	AA	AA	Ad	dd	AA	AA	AA	AA	AA	AA	AA	AA	Ad
chr1D	72799001	72804000	5000	BB	BB	BB	BB	BB	BC	BB	AB	BC	BC	AB	BC	AB	BB	BB	BB	BB	AB	BB	BB	BB	BC	BB	BB	AB	BB	BB	BB	BC	BB	BB	BC	BB	BC	BB	AA	AA	BB	AB	AB	BB	BB	BB	BB	AB	BB
chr1D	73000501	73004500	4000	AA	Ad	AA	AA	AB	AA	AA	AA	AA	AA	AA	AA	AA	AA	AA	AA	AA	AA	AA	AA	AA	AA	AA	AA	AA	AA	AA	AA	AA	AA	AA	AA	AA	AA	AA	AA	Ad	AB	AA	AA	AA	AA	AA	AA	AA	AA
chr1D	73074001	73080000	6000	AB	AA	AA	AA	AA	AA	Ad	AA	AA	AA	AA	AA	AA	AA	AA	AA	AA	AA	AA	AA	AA	AA	AA	AA	AA	AA	AA	AA	AB	AA	Ad	AA	AA	AA	AA	AA	dd	Ad	AA	AA	AA	AA	AA	AA	AA	AA
chr1D	73109001	73114000	5000	AA	AA	AA	AA	AA	Ad	AA	AA	AA	AA	AA	AA	AA	AA	Ad	AA	AA	AA	AA	AA	AA	AA	AA	AA	AA	AA	AA	AA	AA	AA	AA	AA	AA	AA	AA	AA	dd	Ad	Ad	Ad	AA	Ad	Ad	AA	Ad	AA
chr1D	73125501	73141000	15500	AA	AA	AA	AA	AA	AA	AA	AA	AA	AA	AA	AA	AA	AA	AA	AA	AA	AA	AA	AA	AA	AA	AA	AA	AA	AA	AA	AA	AA	AA	AA	AA	AA	AA	AA	Ad	dd	AA	AA	AA	AA	AA	AA	AA	AA	AA
chr1D	73137001	73141000	4000	AA	Ad	Ad	Ad	Ad	AA	AA	Ad	Ad	Ad	AA	AA	AA	AA	Ad	Ad	Ad	Ad	Ad	AA	Ad	Ad	Ad	Ad	Ad	Ad	AA	Ad	Ad	AA	AA	AA	AA	AA	Ad	Ad	dd	AA	Ad	Ad	AA	Ad	Ad	Ad	Ad	Ad
chr1D	73160501	73166000	5500	AA	AA	AA	AA	AA	AA	AA	AA	AA	AA	AA	AA	AA	AA	AA	AA	AA	AA	AA	AA	AA	AA	AA	AA	AA	AA	AA	AA	AA	AA	AA	AA	AA	AA	AA	Ad	dd	AA	AA	AA	AA	AA	AA	AA	AA	AA
chr1D	73340001	73346000	6000	AA	AA	AA	AA	AA	AA	AA	AA	AA	AA	AA	AA	AA	Ad	AA	AA	AA	AA	AA	AA	AA	AA	AA	AA	AA	AA	AA	AB	AA	AA	AA	AA	AA	AA	AA	AB	dd	AA	AA	AA	AA	AA	AA	AA	AA	AA
chr1D	73659001	73667500	8500	AA	AA	AA	AA	AA	AA	AA	AA	AA	AA	AA	AA	AA	AA	AA	AA	AA	AA	AA	Ad	AA	AA	AA	AA	AA	AA	AA	AA	AA	AA	AA	AA	AA	AA	AA	AA	dd	Ad	Ad	Ad	AA	Ad	Ad	Ad	Ad	Ad
chr1D	73663501	73667500	4000	AA	AA	AA	AA	AA	AA	AA	AA	AA	AA	AA	AA	AA	AA	AA	AA	Ad	AA	AA	AA	AA	AA	AA	AA	AA	AA	AA	AA	AA	AA	AA	AA	AA	AA	AA	AA	dd	Ad	Ad	Ad	AA	Ad	AA	Ad	AA	AA
chr1D	73798001	73804000	6000	AA	AA	AA	AA	AA	AA	AA	AA	dd	AA	AA	AA	AA	AA	AA	dd	AA	AA	AA	AA	AA	AA	AA	AA	AA	AA	AA	AA	AA	AA	AA	AA	AA	AA	AA	AA	AA	AA	AA	AA	AA	AA	AA	AA	AA	AA
chr1D	73837001	73841000	4000	AA	AA	AA	AA	Ad	AA	AA	AA	AA	AA	AA	AA	AA	AA	AA	AA	AA	AA	AA	AA	AA	AA	AA	AA	AA	AA	AA	AA	AA	AA	AA	AA	AA	AA	AA	AA	dd	Ad	Ad	AA	AA	Ad	AA	Ad	AA	AA
chr1D	74154501	74160000	5500	Ad	Ad	Ad	Ad	Ad	Ad	Ad	dd	Ad	Ad	dd	dd	Ad	Ad	Ad	Ad	dd	Ad	dd	Ad	dd	Ad	Ad	dd	Ad	Ad	Ad	Ad	Ad	Ad	Ad	Ad	Ad	Ad	Ad	dd	dd	Ad	Ad	dd	Ad	dd	dd	dd	Ad	dd
chr1D	74355501	74363000	7500	Ad	Ad	Ad	Ad	Ad	Ad	Ad	Ad	Ad	Ad	Ad	Ad	Ad	Ad	Ad	Ad	Ad	Ad	dd	Ad	Ad	Ad	Ad	Ad	Ad	Ad	Ad	Ad	Ad	Ad	Ad	Ad	Ad	Ad	Ad	Ad	dd	Ad	Ad	Ad	Ad	Ad	Ad	Ad	Ad	Ad
chr1D	74634501	74646000	11500	Ad	Ad	Ad	Ad	Ad	AA	Ad	Ad	Ad	Ad	Ad	Ad	Ad	Ad	Ad	Ad	Ad	Ad	dd	Ad	Ad	Ad	Ad	Ad	Ad	Ad	Ad	Ad	Ad	AA	AA	Ad	Ad	Ad	Ad	Ad	Ad	Ad	Ad	Ad	Ad	Ad	Ad	Ad	Ad	Ad
chr1D	75366001	75370000	4000	Ad	AA	AA	Ad	Ad	Ad	AA	Ad	AA	Ad	AA	AA	Ad	AA	AA	AA	AA	AA	Ad	Ad	Ad	Ad	AA	Ad	AA	AA	AA	Ad	AA	AA	Ad	AA	AA	AA	AA	Ad	dd	Ad	Ad	Ad	AA	Ad	Ad	Ad	Ad	Ad
chr1D	75825501	75836000	10500	Ad	Ad	Ad	Ad	Ad	Ad	Ad	Ad	Ad	Ad	Ad	Ad	Ad	Ad	Ad	Ad	Ad	Ad	Ad	Ad	Ad	Ad	Ad	Ad	Ad	dd	Ad	Ad	Ad	Ad	Ad	Ad	Ad	Ad	Ad	dd	Ad	Ad	dd	dd	Ad	Ad	Ad	Ad	Ad	dd
chr1D	75866501	75872000	5500	Ad	AA	Ad	AA	Ad	Ad	AA	AA	Ad	Ad	AA	AA	AA	Ad	AA	AA	AA	Ad	AA	Ad	Ad	AA	Ad	AA	AA	dd	AA	AA	Ad	AA	AA	Ad	AA	Ad	AA	Ad	Ad	AA	AA	Ad	AA	Ad	Ad	AA	Ad	Ad
chr1D	75917501	75925500	8000	AA	AA	AA	AA	AA	AA	AA	AA	AA	AA	AA	AA	AA	AA	AA	AA	AA	AA	AA	AA	AA	AA	AA	AA	AA	dd	AA	AA	AA	AA	AA	AA	AA	AA	AA	AA	AA	Ad	Ad	AA	AA	Ad	Ad	Ad	Ad	Ad
chr1D	75953001	75957500	4500	AA	Ad	Ad	Ad	AA	AA	Ad	Ad	AA	Ad	AA	Ad	AA	AA	AA	Ad	Ad	AA	Ad	AA	AA	AA	Ad	AA	Ad	dd	AA	Ad	AA	Ad	AA	AA	Ad	AA	Ad	dd	Ad	AA	Ad	Ad	AA	Ad	Ad	Ad	Ad	Ad
chr1D	76030001	76043500	13500	AA	AA	AB	AA	AA	AA	AA	AA	AA	AB	AA	AA	AA	AA	AA	AA	AA	AA	AA	AA	AA	AA	AA	AA	AA	dd	AA	AA	AA	AA	AA	AA	AA	AA	AA	AA	AA	AA	AA	AA	AA	AA	AA	AA	AA	AA
chr1D	76049501	76058500	9000	AA	AA	AA	AA	AA	AA	AA	AA	AA	AA	AA	AA	AA	AA	AA	AA	AA	AA	AA	AA	AA	AA	AA	AA	AA	dd	AA	AA	AA	AA	AA	AA	AA	AA	AA	AA	AA	AA	AA	AA	AA	AA	AA	AA	AA	AA
chr1D	76169501	76180500	11000	AA	AA	AA	AA	AA	AA	AA	AA	AA	AA	AA	AA	AA	AA	AA	AA	AA	AA	AA	AA	AA	AA	AA	AA	AA	dd	AA	AA	AA	AA	AA	AA	AA	AA	AA	Ad	AA	AA	AA	AA	AA	AA	AA	AA	AA	AA
chr1D	76345001	76349500	4500	AA	AA	AA	AA	AA	AA	AA	AA	AA	AB	AA	AA	AA	AA	AA	AB	AA	AA	AA	AA	AA	AA	Ad	AB	Ad	dd	AA	AA	AA	AA	AA	AA	Ad	AA	AA	AB	AA	AB	AA	AA	AA	AA	AB	AB	AA	AB
chr1D	76386001	76395500	9500	AA	AA	AA	AA	AA	AA	AA	AA	AA	AA	AA	AA	AA	AA	AB	AA	AA	AA	AA	AA	AA	AA	AA	AA	AA	AA	AA	AA	AA	AA	AA	AB	AA	AA	AA	Ad	dd	AA	AA	AA	AA	AA	AA	AA	AA	AA
chr1D	76559501	76563500	4000	dd	dd	dd	dd	dd	dd	dd	dd	dd	dd	dd	dd	dd	dd	dd	dd	dd	dd	dd	dd	dd	dd	dd	dd	dd	dd	dd	dd	dd	dd	dd	dd	dd	dd	dd	dd	dd	dd	dd	dd	dd	dd	dd	dd	dd	dd
chr1D	76710001	76714500	4500	Ad	Ad	BB	AB	Ad	Ad	AA	AB	AA	Ad	AB	AA	AB	AB	Ad	Ad	AA	AA	Ad	AA	Ad	Ad	Ad	BB	AA	AB	Ad	AA	Ad	AA	Ad	AA	AA	Ad	Ad	dd	dd	AA	Ad	Ad	AB	Ad	AA	AA	Ad	AA
chr1D	76713001	76735000	22000	AA	AA	AA	AA	AA	AA	AA	AA	AA	AA	AA	AA	AA	AA	AA	AA	AA	AA	AA	AA	AA	Ad	AA	AA	AA	dd	AA	AA	AA	AA	AA	AA	AA	AA	AA	Ad	AA	AA	AA	AA	AA	AA	AA	AA	AA	AA
chr1D	76761501	76768500	7000	AA	AA	AA	AA	AA	AA	AA	AA	AA	AA	AA	Ad	AA	AA	AA	AA	AA	AA	AA	AA	AA	AA	AA	AA	Ad	dd	AA	AA	AA	AA	AA	AA	AA	AA	AA	AA	AA	Ad	Ad	AA	AA	Ad	Ad	Ad	Ad	Ad
chr1D	77084001	77094000	10000	Ad	AA	Ad	AA	AA	AA	AA	AA	AA	AA	AA	AA	AA	AA	AA	Ad	AA	AA	Ad	AA	AA	AA	Ad	AA	AA	AA	AA	AA	AA	AA	Ad	AA	AA	AA	Ad	Ad	dd	Ad	Ad	Ad	Ad	Ad	Ad	Ad	Ad	Ad
chr1D	77490501	77495000	4500	AA	AA	AA	AA	Ad	AA	Ad	AA	AA	Ad	AA	AA	AA	AA	Ad	AA	AA	AA	Ad	AA	dd	AA	Ad	dd	AA	AA	AA	Ad	AA	AA	Ad	AA	Ad	Ad	AA	Ad	dd	Ad	Ad	Ad	AA	Ad	Ad	Ad	Ad	Ad
chr1D	77543001	77547500	4500	AA	AA	AA	AA	AA	AA	AA	AA	AA	AA	AA	AA	AA	AA	AA	AA	AA	AA	AA	AA	AA	AA	AA	AA	AA	AA	AA	AA	AA	AA	AA	AA	AA	AA	AA	AA	dd	Ad	AA	AA	AA	AA	AA	AA	AA	AA
chr1D	77921001	77931500	10500	AA	AA	AA	AA	AA	AA	AA	AA	AA	AA	AA	AA	AA	AA	AA	AA	AA	AA	AA	AA	AA	AA	AA	AA	AA	AA	AA	AA	AA	AA	AA	AA	AA	AA	AA	AA	AA	AA	AA	AA	AA	AA	AA	AA	AA	AA
chr1D	78418001	78425500	7500	AA	AA	AA	AA	AB	AA	AA	AA	AA	AA	AA	AA	AA	AA	AA	AA	AA	AA	AA	AA	AA	AA	AA	AA	AA	AA	AA	AA	AA	AA	AA	AA	AA	AA	AA	Ad	dd	AB	AA	AA	AA	AA	AA	AA	AA	AA
chr1D	78448501	78461000	12500	AA	AA	AA	AA	AA	Ad	AA	AA	AA	AA	AA	AA	AA	AA	AA	AA	Ad	AA	AA	AA	AA	Ad	AA	AA	AA	AA	AA	AA	AA	AA	AA	AA	AA	AA	AA	Ad	dd	Ad	Ad	Ad	AA	Ad	Ad	Ad	Ad	Ad
chr1D	79141001	79145000	4000	AA	AA	dd	AA	AA	AB	AA	AA	AA	AA	AA	AA	AA	AA	AA	AA	AB	AA	AA	AB	AA	AA	AA	AB	AA	AA	AB	AA	AA	AB	AB	AA	AA	AA	AA	AA	AA	AB	AA	AA	AA	AA	AA	AA	AA	AA
chr1D	79270001	79277500	7500	AA	AA	AA	AA	AA	AA	AA	AA	AA	AA	AA	AA	AA	AA	AA	AA	AA	AA	dd	AA	AA	AA	AA	AA	AA	AA	AA	AA	AA	AA	AA	AA	AA	AA	AA	AA	AA	AA	AA	AB	AA	AA	AA	AA	AA	AA
chr1D	79597501	79605000	7500	AA	AA	AA	AA	AA	AA	AA	AA	AA	AA	AA	AA	AA	AA	AA	AA	AA	AA	AA	AA	dd	AA	AA	AA	AA	AA	AA	AA	AA	AA	AA	AA	AA	AA	AA	AA	AA	AA	AA	AA	AA	AA	AA	AA	AA	AA
chr1D	79911001	79916000	5000	Ad	Ad	AA	Ad	Ad	Ad	AA	AA	Ad	Ad	Ad	AA	Ad	Ad	AA	Ad	Ad	AA	Ad	AA	Ad	AA	AA	dd	AA	Ad	AA	Ad	AA	Ad	AA	AA	AA	AA	Ad	Ad	Ad	Ad	Ad	Ad	Ad	Ad	Ad	Ad	Ad	Ad
chr1D	80201001	80206000	5000	AA	AA	AA	AA	dd	AA	AA	AA	AA	AA	AA	AB	AA	AA	AA	AA	AA	AA	AA	AA	Ad	AA	AA	Ad	AA	Ad	AA	AA	AA	AA	AA	AA	AA	AB	Ad	Ad	AA	AA	AA	Ad	AA	AA	AA	AA	AA	AA
chr1D	80709501	80715500	6000	AA	AA	AA	AA	AA	AA	AA	AA	AA	AA	AA	AA	AA	AA	AA	AA	AA	AA	AA	AA	AA	AA	AA	AA	AA	AA	AA	AB	AA	AA	AA	AA	AA	AA	AA	dd	AA	AB	Ad	Ad	AA	AA	AA	AA	AA	Ad
chr1D	81028001	81032000	4000	AA	dd	AA	AB	AA	AA	AA	AA	AA	AA	AA	AA	AB	AA	dd	AA	AA	AA	AA	AA	AA	AB	AA	AA	Ad	Ad	AA	AA	AA	AA	AB	AA	AA	AA	AA	AA	AA	Ad	dd	AA	AA	AA	dd	AA	AA	AA
chr1D	81696501	81710000	13500	AA	AA	AA	AA	AA	AA	AA	AA	AA	AA	AA	AA	AA	AA	AA	AA	AA	AA	AA	AA	AA	AA	AA	AA	AA	AA	AA	AA	AA	AA	AA	AA	AA	AA	AA	AB	AA	AA	AA	AA	AA	AA	AA	AA	AA	AA
chr1D	82829501	83037000	207500	AA	AA	AA	AA	AA	AA	AA	AA	AA	AA	AA	AA	AA	AA	AA	AA	AA	dd	AA	AA	AA	AA	AA	AA	AA	AA	AA	AA	AA	AA	AA	AA	dd	AA	AA	dd	AA	AA	AA	AA	AA	AA	AA	dd	AA	AA
chr1D	83133501	83148000	14500	AA	AA	AA	AA	AA	AA	AA	AA	AA	AA	AA	AA	AA	AA	AA	AA	AA	AA	AA	AA	AA	AA	AA	AA	AA	AA	AA	AA	AA	AA	AA	AA	AA	AA	AA	AB	dd	AA	AA	AB	AA	AA	AA	AA	AA	AA
chr1D	83247001	83251500	4500	AA	AA	AA	Ad	AA	AA	AA	AA	Ad	Ad	Ad	Ad	Ad	AA	AA	Ad	Ad	AA	Ad	AA	Ad	AA	Ad	Ad	Ad	Ad	Ad	Ad	AA	Ad	Ad	AA	Ad	Ad	Ad	Ad	dd	Ad	Ad	Ad	Ad	Ad	Ad	Ad	Ad	Ad
chr1D	84326501	84330500	4000	AA	AA	AB	AA	AA	Ad	AA	AA	AA	AA	AA	Ad	AA	AA	AA	AA	AA	AA	AA	Ad	Ad	AA	AA	AA	AA	AA	AA	Ad	Ad	AA	AA	AA	AA	AA	AA	AA	AA	Ad	Ad	Ad	AA	AA	Ad	AA	Ad	AA
chr1D	84520001	84524000	4000	dd	Ad	Ad	Ad	Ad	dd	dd	Ad	Ad	dd	dd	Ad	Ad	Ad	Ad	Ad	Ad	Ad	Ad	Ad	Ad	Ad	Ad	Ad	Ad	Ad	Ad	Ad	Ad	dd	Ad	Ad	Ad	Ad	Ad	dd	Ad	dd	dd	dd	Ad	dd	dd	dd	dd	dd
chr1D	84716001	84721000	5000	Ad	Ad	AA	Ad	Ad	Ad	Ad	Ad	Ad	Ad	AA	AA	AA	Ad	Ad	Ad	Ad	Ad	Ad	Ad	AA	Ad	Ad	Ad	Ad	Ad	Ad	Ad	Ad	Ad	Ad	Ad	Ad	Ad	Ad	Ad	Ad	Ad	Ad	Ad	Ad	Ad	Ad	Ad	Ad	Ad
chr1D	84785001	84794000	9000	dd	dd	dd	dd	dd	dd	dd	dd	dd	dd	dd	dd	dd	dd	dd	dd	dd	dd	dd	dd	dd	dd	dd	dd	dd	dd	dd	dd	dd	dd	dd	dd	dd	dd	dd	dd	dd	dd	dd	dd	dd	dd	dd	dd	dd	dd
chr1D	84850501	84854500	4000	Ad	Ad	dd	Ad	Ad	Ad	Ad	Ad	Ad	Ad	Ad	Ad	Ad	Ad	Ad	Ad	Ad	Ad	Ad	Ad	Ad	Ad	Ad	Ad	Ad	Ad	Ad	Ad	Ad	Ad	Ad	Ad	Ad	Ad	dd	dd	dd	Ad	Ad	dd	Ad	Ad	Ad	Ad	Ad	dd
chr1D	85259001	85263000	4000	AA	AA	AA	dd	AA	AA	AA	AA	AA	AA	AA	AA	AA	AA	AA	AA	AA	AA	AA	AA	AA	AA	AA	AA	AA	AA	AA	AA	AA	AA	AA	AA	AA	AA	AA	BB	AA	AA	AA	AA	AA	AA	Ad	AA	dd	dd
chr1D	85448501	85453000	4500	AA	AA	Ad	AA	AA	AA	AA	AA	AA	AA	Ad	Ad	AA	AA	AA	AA	Ad	AA	AA	AA	AA	AA	AA	AA	AA	AA	AA	AB	AA	AA	AA	AA	AA	AA	AA	Ad	dd	AA	Ad	Ad	AA	Ad	AA	AA	Ad	Ad
chr1D	85448501	85457500	9000	AA	AA	AA	AA	AA	AA	AA	AA	AA	AA	Ad	AA	AA	AA	AA	AA	Ad	AA	AA	AA	AA	AA	AA	AA	AA	AA	AA	AB	AA	AA	AA	AA	AA	AA	AA	Ad	dd	AA	Ad	Ad	AA	Ad	AA	AA	Ad	Ad
chr1D	86036001	86043000	7000	AA	AA	AB	AA	AA	AA	AA	AA	AA	AA	AA	AA	AA	AA	AB	AA	AA	AA	AA	AA	AA	AA	AB	AA	AA	AA	AA	AA	AA	AA	AA	AA	AA	AA	AA	AB	AA	Ad	AA	AA	AA	AA	AA	AA	AA	AA
chr1D	86610001	86615000	5000	Ad	Ad	Ad	Ad	Ad	Ad	Ad	Ad	Ad	Ad	Ad	Ad	Ad	Ad	Ad	Ad	Ad	Ad	Ad	Ad	Ad	Ad	Ad	Ad	Ad	Ad	Ad	Ad	Ad	Ad	Ad	Ad	Ad	Ad	Ad	dd	dd	Ad	Ad	Ad	Ad	Ad	Ad	Ad	Ad	Ad
chr1D	86613501	86618000	4500	Ad	Ad	Ad	AA	Ad	Ad	Ad	Ad	Ad	Ad	Ad	Ad	Ad	AA	Ad	Ad	Ad	Ad	Ad	Ad	Ad	Ad	Ad	Ad	Ad	Ad	Ad	Ad	Ad	Ad	Ad	Ad	Ad	Ad	Ad	dd	dd	Ad	Ad	Ad	Ad	Ad	Ad	Ad	Ad	Ad
chr1D	86723001	86727000	4000	AA	AA	AA	AA	AA	AA	AA	AA	AA	AA	AA	AA	AA	AA	AA	AA	AA	AA	AA	AB	AA	AA	AA	dd	AA	AA	AA	AA	AA	AA	AB	AA	AA	AA	AA	AB	AB	AA	AA	AB	AA	AB	AA	AA	AA	AA
chr1D	87293501	87305000	11500	dd	dd	dd	dd	dd	dd	dd	dd	dd	dd	dd	dd	dd	dd	dd	dd	dd	dd	dd	dd	dd	dd	dd	dd	dd	dd	dd	dd	dd	dd	dd	dd	dd	dd	dd	dd	dd	dd	dd	dd	dd	dd	dd	dd	dd	dd
chr1D	87341501	87346000	4500	AA	AA	AA	AA	AA	AA	AA	AA	AA	AA	AA	AA	AA	AA	AA	AA	AA	AA	AB	AA	AA	AA	AA	AA	AA	AA	AA	AA	AA	AA	AB	AA	AA	AA	AA	AA	AA	AA	AA	AA	AA	AA	AA	AA	AA	AA
chr1D	88054501	88058500	4000	AA	AA	AA	AB	AA	AA	AA	AB	AA	AA	AA	AA	AA	AB	AA	AA	AA	Ad	AA	Ad	AA	Ad	AA	AA	AB	AA	AA	AB	AA	AA	AA	AA	AA	AB	AA	dd	AA	AA	AA	Ad	AA	AA	AA	AA	AA	AA
chr1D	88167501	88173000	5500	AA	Ad	Ad	Ad	Ad	AA	AA	Ad	Ad	Ad	Ad	Ad	AA	Ad	Ad	Ad	Ad	AA	Ad	Ad	Ad	AA	AA	Ad	Ad	Ad	Ad	AB	AA	Ad	Ad	AA	AA	AA	Ad	Ad	Ad	AA	Ad	dd	AA	Ad	Ad	Ad	Ad	Ad
chr1D	88831501	88837000	5500	AA	AB	AA	AA	AA	AA	AA	AA	AA	AA	AA	AA	AA	AA	AA	AA	AA	AB	AA	AA	AA	AA	AA	AA	AA	AA	AA	AA	AA	AA	AA	AA	AA	AA	AA	AA	AA	AA	AA	AA	AA	AB	AA	AA	AA	AA
chr1D	89152001	89156500	4500	Ad	dd	dd	dd	dd	dd	dd	dd	dd	Ad	dd	dd	dd	Ad	dd	dd	dd	Ad	dd	dd	Ad	dd	dd	dd	dd	Ad	dd	dd	Ad	dd	Ad	dd	dd	Ad	dd	dd	dd	dd	dd	dd	Ad	dd	dd	dd	dd	dd
chr1D	89153501	89161000	7500	Ad	Ad	Ad	Ad	Ad	Ad	Ad	Ad	Ad	Ad	Ad	Ad	Ad	Ad	Ad	Ad	Ad	Ad	Ad	Ad	Ad	Ad	Ad	Ad	Ad	Ad	Ad	Ad	Ad	Ad	Ad	Ad	Ad	Ad	Ad	dd	dd	dd	dd	dd	Ad	dd	Ad	dd	Ad	Ad
chr1D	89661001	89670000	9000	AA	AA	AA	AA	AA	AA	AA	AA	AA	AA	AA	AA	AA	AA	AA	AA	AA	AA	AA	AA	AA	AA	AA	AA	AA	AA	AA	AA	AA	AA	AA	AA	AA	AA	AA	AA	dd	AA	AA	AA	AA	AA	AB	AA	AA	AB
chr1D	89816501	89821000	4500	AA	AB	AA	AA	AA	AA	AA	AA	AA	AA	AA	AA	AA	AA	AA	AA	AA	AA	AA	AA	AA	AA	AA	AA	AA	AA	AA	AA	AA	AA	AA	AA	AA	AA	AA	AB	dd	AA	AA	AA	AA	AA	Ad	AA	AA	AA
chr1D	90020001	90024500	4500	AA	Ad	AA	AA	AA	AA	AA	AA	AA	AA	AA	AA	Ad	AA	AA	AA	AA	Ad	AB	AA	AA	AA	AA	AA	AA	AA	AA	AA	AA	AA	AA	AA	AA	AA	AA	Ad	AA	AB	AA	Ad	AA	AA	AA	AA	AA	AA
chr1D	90117001	90125000	8000	AA	AA	AA	AA	AA	AA	AA	AA	AA	AA	AA	Ad	AA	AA	AA	Ad	AA	AA	AA	AA	AA	AA	AA	Ad	AA	AA	AA	AB	AA	AA	AA	AA	AA	AA	Ad	Ad	dd	AA	AA	Ad	AA	Ad	AA	AA	AA	AA
chr1D	90122001	90126500	4500	AA	AA	AA	AA	AA	AA	AA	Ad	AA	Ad	AA	Ad	AA	AA	AA	AA	AA	Ad	Ad	Ad	AA	AA	AA	AA	Ad	Ad	AA	AB	AA	AA	Ad	Ad	AA	AA	Ad	Ad	dd	AB	AA	Ad	AA	Ad	AA	AA	Ad	AA
chr1D	90422001	90426000	4000	Ad	Ad	Ad	Ad	Ad	Ad	Ad	Ad	dd	Ad	dd	dd	Ad	Ad	Ad	Ad	Ad	Ad	dd	Ad	dd	dd	dd	Ad	Ad	Ad	Ad	dd	Ad	Ad	Ad	Ad	Ad	dd	Ad	dd	Ad	dd	dd	dd	dd	dd	dd	dd	dd	dd
chr1D	90566001	90575000	9000	AA	AA	AA	AA	AA	AA	AA	AA	AA	AA	AA	AA	AA	AA	AA	AA	AA	AA	AA	AA	AA	AA	AA	AA	AA	AA	AA	AA	AA	AA	Ad	dd	AA	AA	AA	AA	AA	AA	AA	AA	AA	AA	AB	AA	AA	AA
chr1D	90860501	90864500	4000	AA	AB	AA	AA	AA	AA	AA	AA	AA	AA	AA	AA	AA	AA	AA	AA	AA	AA	AA	AA	AA	AA	AA	AA	AA	AB	AA	AB	AB	AA	AB	AA	AB	AB	AA	dd	AA	AB	AA	Ad	AA	Ad	AA	AA	AA	AA
chr1D	91649501	91665500	16000	AA	AA	AA	AA	AA	AA	AA	AA	AA	AA	AA	AA	AA	AA	AA	AA	AA	AA	AA	AA	AA	AA	AA	AA	AA	AA	AA	AA	AA	AA	AA	AA	AA	AA	AA	AA	AA	AA	AA	AA	AA	AA	AA	AA	AA	AA
chr1D	92235501	92353500	118000	AA	AA	AA	AA	AA	AA	AA	AA	AA	AA	AA	dd	dd	AA	AA	AA	dd	AA	AA	AA	AA	AA	AA	AA	AA	AA	AA	AA	AA	AA	AA	AA	AA	AA	AA	AA	AA	AA	AA	dd	AA	dd	AA	AA	AA	AA
chr1D	92446501	92451000	4500	AA	AA	AA	AA	AA	AA	AA	AA	AA	AA	AA	AA	AA	Ad	AA	AA	Ad	Ad	AA	AA	AA	AA	AA	AA	AA	AA	AA	AB	AA	AA	AA	AA	AA	AA	AA	dd	AA	AA	AA	Ad	AA	Ad	AA	AA	AA	AA
chr1D	93262001	93266500	4500	AB	AB	AA	AA	AA	AB	AB	AB	AA	AA	AA	AA	AB	AB	AB	AA	AA	AA	AA	AB	AA	AB	AA	AB	AA	AA	AB	AA	AA	AA	AB	AA	AA	AA	AB	AB	AA	AA	AA	AB	AA	AA	AA	AA	AA	AA
chr1D	93600001	93608500	8500	AA	AA	AA	Ad	Ad	AA	AA	AA	AA	AA	AA	AA	AA	AA	AA	AA	AA	AA	AA	Ad	AA	AA	AA	AA	AA	AA	AA	AA	Ad	AA	AA	Ad	AA	Ad	Ad	AA	dd	AA	AA	AA	AA	AA	AA	AA	AA	AA
chr1D	93635001	93640500	5500	AA	AA	AA	Ad	AA	Ad	AA	AA	AA	AA	AA	AA	AA	AA	AA	AA	AA	AA	AA	AA	AA	AA	AA	AA	AB	AA	AA	AA	AA	AA	AA	AA	AB	AA	AA	AA	AA	AA	AA	AA	AA	AA	AA	AA	AA	AA
chr1D	93945501	93981500	36000	AA	AA	AA	AA	AA	AA	AA	AA	AA	AA	AA	AA	AA	AA	AA	AA	AA	AA	AA	AA	AA	AA	AA	AA	AA	AA	AA	AA	AA	AA	AA	AA	AA	AA	AA	AA	AA	AA	AA	AA	AA	AA	AA	AA	AA	AA
chr1D	93990001	93996500	6500	AA	AA	AA	AA	AA	AA	AA	AA	AA	AA	AA	AA	AA	AA	AB	AA	AA	AA	AA	AA	AA	AA	AA	AA	AA	AB	AA	AA	AA	AA	AA	AA	AA	AA	AA	AA	AA	AA	AA	AA	AA	AA	AB	AA	AA	AA
chr1D	94495501	94501000	5500	AA	Ad	AA	AA	AA	AA	AA	AB	AA	AA	AA	AA	AA	AA	AA	AA	AA	AA	AA	AA	dd	AA	AA	AA	AA	AA	AA	AA	AA	AA	AA	AA	AB	AA	AA	Ad	AA	Ad	AA	AA	AA	Ad	Ad	Ad	Ad	Ad
chr1D	94671001	94675000	4000	AA	AA	AB	AA	Ad	Ad	AA	AA	AA	AA	AA	AB	AA	AA	AA	AA	AA	AA	AA	AA	Ad	Ad	AB	AA	AA	Ad	AA	Ad	Ad	AB	AA	AA	AA	AA	AB	AB	Ad	Ad	AA	AA	AA	Ad	AA	Ad	AB	AA
chr1D	94743501	94748500	5000	AA	AA	AA	AA	AA	AA	AA	AA	dd	AA	AA	AA	AA	AA	AA	dd	Ad	AA	AA	AA	AA	Ad	AA	AA	AA	AA	Ad	AA	AA	Ad	Ad	AA	AA	AA	AA	Ad	AA	Ad	Ad	AA	AA	AA	Ad	Ad	Ad	AA
chr1D	94778501	94782500	4000	Ad	Ad	AA	Ad	Ad	Ad	Ad	Ad	Ad	Ad	Ad	AA	Ad	Ad	Ad	Ad	Ad	Ad	AA	Ad	Ad	Ad	Ad	Ad	Ad	Ad	Ad	Ad	Ad	AA	Ad	AA	Ad	Ad	AA	AA	Ad	dd	Ad	Ad	Ad	Ad	Ad	Ad	Ad	AA
chr1D	94790001	94812500	22500	AB	AB	BB	AB	AB	AB	AB	AB	BB	AB	BB	BB	BB	AB	AB	BB	BB	AB	BB	AB	BB	AB	BB	BC	BB	AB	BB	BB	AB	AB	AB	AB	AB	AB	BB	BC	dd	BB	BB	BC	BB	BB	BB	AB	BB	BC
chr1D	94861001	94866000	5000	AB	AB	AB	AB	AB	Ad	AA	AB	AB	AB	AA	BB	AB	AB	AB	AB	AB	AB	BB	AB	AB	Ad	AA	BB	BB	AB	AA	AB	AA	AB	AB	AB	AB	AB	AB	BB	Ad	AB	AB	BB	AB	AB	AB	AA	BB	AB
chr1D	94937001	94944000	7000	dd	dd	dd	dd	dd	dd	dd	dd	dd	dd	dd	dd	dd	dd	dd	dd	dd	dd	dd	dd	dd	dd	dd	dd	dd	dd	dd	dd	dd	dd	dd	dd	dd	dd	dd	dd	dd	dd	dd	dd	dd	dd	dd	dd	dd	dd
chr1D	95072501	95082000	9500	Ad	Ad	Ad	Ad	Ad	Ad	Ad	Ad	Ad	Ad	Ad	Ad	Ad	Ad	Ad	Ad	Ad	Ad	Ad	Ad	Ad	Ad	Ad	Ad	Ad	Ad	Ad	AA	Ad	Ad	Ad	Ad	Ad	Ad	Ad	Ad	Ad	Ad	Ad	Ad	Ad	Ad	Ad	Ad	Ad	AA
chr1D	95386501	95390500	4000	Ad	dd	dd	Ad	dd	dd	Ad	dd	Ad	dd	dd	dd	Ad	Ad	dd	Ad	dd	dd	dd	Ad	dd	dd	dd	dd	dd	dd	Ad	dd	dd	Ad	dd	Ad	dd	Ad	Ad	dd	Ad	Ad	dd	dd	dd	dd	dd	dd	dd	dd
chr1D	95592501	95598000	5500	AA	AA	AA	AA	AA	AA	AA	AA	AA	AA	AA	AA	AA	AA	AA	AA	AA	AA	AA	AA	AA	AA	AA	AA	AA	AA	AA	AA	AA	AA	AA	AA	AA	AA	AA	Ad	dd	AA	AA	AA	AA	AA	AB	AA	AA	AB
chr1D	96191501	96238500	47000	AA	AA	AA	AA	AA	AA	AA	AA	AA	AA	AA	AA	AA	AA	AA	AA	AA	AA	AA	AA	dd	AA	AA	AA	AA	AA	AA	AA	AA	AA	AA	AA	AA	AA	AA	AA	AA	AA	AA	AA	AA	AA	AA	AA	AA	AA
chr1D	96247001	96253000	6000	AA	AA	AA	AA	AA	AA	AA	AA	AA	AA	AA	AA	AA	AA	AA	AA	AA	AA	AA	AA	AA	AA	AA	AA	AA	AA	AA	AA	AA	AA	AA	AA	AA	AA	AA	Ad	Ad	Ad	dd	Ad	AA	Ad	Ad	Ad	AA	Ad
chr1D	96491001	96525000	34000	AA	AA	AA	AA	AA	AA	AA	AA	AA	AA	dd	AA	AA	AA	AA	AA	AA	AA	AA	AA	AA	AA	AA	AA	AA	AA	AA	AA	AA	AA	AA	AA	AA	AA	AA	AA	AA	AA	AA	AA	AA	AA	AA	AA	AA	AA
chr1D	96974501	96986500	12000	AA	AA	AA	AA	AA	AA	AA	AA	AA	AA	AA	AA	AA	dd	AA	AA	AA	AA	AA	AA	AA	dd	dd	AA	AA	AA	AA	AA	AA	dd	AA	AA	AA	AA	AA	AA	AA	AA	AA	AA	AA	Ad	AA	AA	AA	AA
chr1D	96982501	96987000	4500	AA	AA	AA	AA	AA	AA	AA	AA	AA	AA	AA	AA	AA	dd	AA	AA	AA	AA	AB	AB	AA	dd	dd	AA	AB	AB	AA	Ad	AA	dd	AA	AA	AB	AB	AB	AA	AA	AA	AA	AA	AA	AA	AA	AA	AA	AA
chr1D	98321001	98333500	12500	AA	AA	AA	AA	AA	AA	AA	AA	AA	AA	AA	AA	AA	AA	AA	AA	AA	AA	AA	AA	AA	AA	AA	AA	AA	AA	AA	AA	AA	dd	AA	AA	AA	AA	AA	Ad	AA	AA	AA	AA	AA	AA	AA	AA	AA	AA
chr1D	99168001	99173500	5500	AA	Ad	AA	Ad	AA	AA	AA	AA	AA	AA	AA	AA	AA	AA	AA	AA	Ad	AA	Ad	AA	AA	AA	AA	AA	AA	Ad	AA	AA	AA	AA	AA	AA	Ad	Ad	AA	AA	AA	AA	AA	Ad	AA	AA	AA	AA	AA	AB
chr1D	99415001	99427000	12000	AA	AA	AA	AA	AA	AA	AA	AA	AA	AA	AA	AA	AA	AA	AA	AA	AA	AA	AA	AA	AA	AA	AA	AA	AA	AA	AA	AA	AA	AA	Ad	AA	AA	AA	AA	AA	AA	AA	AA	AA	AA	AA	AA	AA	AA	AA
chr1D	99629501	99633500	4000	dd	dd	dd	dd	dd	dd	dd	dd	dd	dd	dd	dd	dd	dd	dd	dd	dd	dd	dd	dd	dd	dd	dd	dd	dd	dd	dd	dd	dd	dd	dd	dd	dd	dd	dd	dd	Ad	dd	dd	dd	dd	dd	dd	dd	dd	dd
chr1D	99676001	99696500	20500	Ad	AA	Ad	Ad	Ad	Ad	Ad	Ad	AA	Ad	Ad	Ad	AA	Ad	Ad	AA	Ad	Ad	Ad	Ad	Ad	AA	Ad	AA	Ad	AA	Ad	Ad	Ad	Ad	Ad	Ad	Ad	AA	Ad	AA	dd	AA	AA	Ad	AA	AA	Ad	AA	AA	Ad
chr1D	101119001	101126500	7500	Ad	Ad	AA	Ad	Ad	Ad	AA	Ad	Ad	AA	Ad	AA	AA	Ad	Ad	Ad	Ad	Ad	Ad	Ad	Ad	AA	Ad	Ad	AA	AA	Ad	Ad	Ad	AA	Ad	Ad	Ad	Ad	Ad	Ad	Ad	Ad	Ad	Ad	Ad	Ad	Ad	Ad	Ad	Ad
chr1D	101340001	101363500	23500	AA	AA	AA	AA	AA	AA	AA	AA	AA	AA	AA	AA	AA	AA	AA	AA	AA	AA	AA	AA	AA	AA	AA	AA	AA	AA	AA	AA	AA	AA	AA	AA	AA	AA	AA	AA	AA	AA	AA	AA	AA	AA	AA	AA	AA	AA
chr1D	101375001	101382000	7000	AA	AA	AB	AA	AA	AA	AA	AB	AA	AA	AA	AA	AA	AA	AA	AA	AA	AA	AA	AA	AA	AA	AA	AA	AA	AA	AA	AA	AA	AB	AA	AA	AA	AA	AA	AA	AA	AB	AA	AA	AA	AA	AA	AA	AA	AA
chr1D	101385501	101455500	70000	AA	AA	AA	AA	AA	AA	AA	AA	AA	AA	AA	AA	AA	AA	AA	AA	AA	AA	AA	AA	AA	AA	AA	AA	AA	AA	AA	AA	AA	AA	AA	AA	AA	AA	AA	AA	AA	AA	AA	AA	AA	AA	AA	AA	AA	AA
chr1D	101700001	101708500	8500	AA	AA	AA	AA	AA	AA	dd	AA	AA	AA	AA	AA	AA	AA	AA	AA	AA	AA	AA	AA	AA	AA	AA	AA	AA	AA	AA	AA	AA	AA	AA	AA	AA	AA	AA	AA	AA	AA	AA	AA	AA	AA	AA	AA	AA	AA
chr1D	102247001	102258500	11500	AA	AA	Ad	AA	Ad	AA	Ad	Ad	AA	Ad	Ad	AA	Ad	AA	AA	Ad	AA	AA	Ad	AA	Ad	AA	Ad	Ad	Ad	AA	AA	Ad	AA	AA	AA	AA	AA	AA	AA	Ad	Ad	Ad	Ad	Ad	Ad	Ad	Ad	Ad	Ad	Ad
chr1D	102874501	102881000	6500	dd	dd	dd	dd	dd	dd	dd	dd	dd	dd	dd	dd	dd	dd	dd	dd	dd	dd	dd	dd	dd	dd	dd	dd	dd	dd	dd	dd	dd	dd	dd	dd	dd	dd	dd	dd	dd	dd	dd	dd	dd	dd	dd	dd	dd	dd
chr1D	102968001	102972000	4000	dd	dd	dd	dd	dd	dd	dd	dd	dd	dd	dd	dd	dd	dd	dd	dd	dd	dd	dd	dd	dd	dd	dd	dd	dd	dd	dd	dd	dd	dd	dd	dd	dd	dd	dd	dd	dd	dd	dd	dd	dd	dd	dd	dd	dd	dd
chr1D	103334001	103338000	4000	dd	dd	dd	dd	dd	dd	dd	dd	dd	dd	dd	dd	dd	dd	dd	dd	dd	dd	dd	dd	dd	dd	dd	dd	dd	dd	dd	dd	dd	dd	dd	dd	dd	dd	dd	dd	dd	dd	dd	dd	dd	dd	dd	dd	dd	dd
chr1D	103610501	103625000	14500	AA	AA	AA	AA	AA	AA	AA	AA	AA	AA	AA	AA	AA	AA	AA	AA	AA	AA	AA	AA	AA	AA	AA	AA	AA	AA	AA	AA	AA	AA	AA	AA	AA	AA	AA	AB	AA	AA	AA	AA	AA	AA	AA	AA	AA	AA
chr1D	103763501	103776500	13000	AA	AA	AA	AA	AA	AA	AA	AA	AA	AA	AA	AA	AA	AA	AA	AA	AA	AA	AA	AA	AA	AA	AA	AA	AA	AA	AA	AA	AA	AA	AA	AA	AA	AA	AA	AA	dd	AA	AA	AA	AA	AA	AA	AA	AA	AA
chr1D	105159001	105282500	123500	AA	AA	AA	AA	AA	AA	AA	AA	AA	AA	AA	AA	AA	AA	AA	AA	AA	AA	AA	AA	AA	AA	AA	AA	AA	AA	AA	AA	AA	AA	AA	AA	AA	AA	AA	AA	dd	AA	AA	AA	AA	AA	AA	AA	AA	AA
chr1D	105392501	105397000	4500	Ad	AA	AA	AA	Ad	AA	Ad	AA	AA	AA	Ad	AA	AA	AA	AA	AA	AA	AA	AA	Ad	AA	Ad	AA	Ad	Ad	AA	AA	AA	Ad	AA	Ad	Ad	Ad	Ad	AA	Ad	Ad	Ad	Ad	Ad	AA	Ad	Ad	Ad	Ad	Ad
chr1D	106106501	106110500	4000	dd	Ad	Ad	Ad	Ad	Ad	Ad	dd	dd	Ad	dd	dd	Ad	Ad	Ad	dd	Ad	Ad	Ad	Ad	Ad	Ad	Ad	Ad	Ad	Ad	dd	dd	Ad	Ad	Ad	Ad	Ad	dd	dd	dd	Ad	dd	dd	dd	Ad	dd	dd	dd	dd	dd
chr1D	106106501	106116500	10000	Ad	Ad	Ad	Ad	Ad	Ad	Ad	Ad	dd	Ad	Ad	dd	Ad	Ad	Ad	Ad	Ad	Ad	Ad	Ad	Ad	Ad	Ad	dd	Ad	Ad	Ad	dd	Ad	Ad	Ad	Ad	Ad	dd	Ad	dd	Ad	dd	dd	dd	Ad	dd	dd	dd	dd	dd
chr1D	106333001	106340500	7500	dd	dd	dd	dd	dd	dd	dd	dd	dd	dd	dd	dd	dd	dd	dd	dd	dd	dd	dd	dd	dd	dd	dd	dd	dd	dd	dd	dd	dd	dd	dd	dd	dd	dd	dd	dd	dd	dd	dd	dd	dd	dd	dd	dd	dd	dd
chr1D	106812001	106818000	6000	AB	AA	AA	AA	AA	AA	AA	AA	AA	AA	Ad	AA	AA	AA	AA	AA	AA	AA	AA	AA	AA	AA	AA	AA	AA	AA	AB	AA	Ad	AA	AA	AA	AA	AA	AA	AA	dd	AA	AA	AA	AA	AA	AA	AA	AA	Ad
chr1D	106930001	106938000	8000	AA	AA	AA	AA	AA	AA	AA	dd	AA	AA	AA	AA	AA	AA	AA	AA	AA	AA	AA	AA	AA	AA	AA	AA	AA	AA	AA	AA	AA	AA	AA	AA	AA	AA	AA	AB	AA	AA	AA	AA	AA	AA	AA	AA	AA	AA
chr1D	107276001	107281500	5500	AA	AA	AA	AA	AA	AA	AA	AA	AA	AA	AA	AA	AA	AA	AA	AA	AA	AA	AA	AA	AA	AA	AA	AA	AA	AA	AA	AA	AA	AA	AA	Ad	AA	AA	AA	AA	AA	AA	AA	AA	AA	AA	AA	AA	AA	Ad
chr1D	107629001	107633000	4000	AA	AA	Ad	Ad	Ad	Ad	Ad	Ad	Ad	Ad	Ad	Ad	Ad	Ad	Ad	Ad	Ad	Ad	Ad	Ad	AA	Ad	AA	Ad	Ad	Ad	AA	AA	AA	Ad	Ad	Ad	Ad	Ad	Ad	dd	Ad	Ad	Ad	Ad	AA	Ad	Ad	Ad	Ad	Ad
chr1D	108070501	108074500	4000	AA	AA	AA	AA	AA	AA	AB	AA	AA	AA	AA	AB	AA	AA	AA	AA	AA	AA	AA	AB	AA	AA	AA	AA	AA	AA	AA	AA	AB	AA	AA	AA	AB	AA	AA	AA	dd	AA	AA	AA	AA	AA	AA	AA	AA	AA
chr1D	108077001	108085500	8500	AA	AA	AA	AA	AA	AA	AA	AA	AA	AA	AA	AA	AA	AA	AA	AA	AA	AA	AA	AA	AA	AA	AA	Ad	Ad	Ad	AA	AA	AA	AA	AA	AA	AA	Ad	AA	AA	dd	Ad	Ad	AA	AA	Ad	Ad	Ad	Ad	Ad
chr1D	109035001	109040500	5500	AA	AA	AA	AA	AA	AA	AA	Ad	AA	AA	AA	AA	AA	AA	AA	AA	AA	AA	AA	AA	AA	Ad	AA	AA	AA	AA	AA	AA	AA	AA	AA	AA	AA	dd	AA	AB	AA	AA	AA	AA	AA	AA	Ad	AA	AA	Ad
chr1D	110508001	110513000	5000	AA	Ad	dd	Ad	AA	Ad	Ad	Ad	Ad	AA	AA	AA	AA	Ad	AA	AA	Ad	Ad	Ad	Ad	AA	AA	Ad	Ad	AA	AA	AA	AA	Ad	AA	Ad	Ad	AA	Ad	AA	Ad	BB	AA	Ad	AA	AA	Ad	Ad	AA	AA	Ad
chr1D	110528501	110534500	6000	AA	Ad	Ad	Ad	AA	AA	Ad	AA	AA	AA	Ad	Ad	Ad	AA	Ad	Ad	AA	AA	AA	Ad	Ad	Ad	AA	Ad	AA	Ad	AA	Ad	AA	AA	Ad	Ad	AA	AA	Ad	Ad	AA	Ad	Ad	Ad	Ad	Ad	Ad	Ad	Ad	Ad
chr1D	110965001	110969000	4000	AA	AA	AA	AA	AA	dd	AA	AA	AA	AA	AA	AA	AA	AA	AA	AA	AA	AA	AA	AB	AA	AA	AA	AA	AA	AB	AA	AA	AA	AB	AA	AA	AA	AB	AA	AA	AA	AA	AA	AA	AA	AA	AA	AA	Ad	Ad
chr1D	110991001	110998000	7000	dd	dd	dd	dd	dd	dd	dd	dd	dd	dd	dd	dd	dd	dd	dd	dd	dd	dd	dd	dd	dd	dd	dd	dd	dd	dd	dd	dd	dd	dd	Ad	Ad	dd	dd	dd	dd	dd	dd	dd	dd	dd	dd	dd	dd	dd	dd
chr1D	111021001	111033000	12000	Ad	Ad	dd	AA	AA	AA	AA	AA	Ad	AA	Ad	AA	AA	AA	AA	AA	Ad	AA	AA	AA	Ad	AA	Ad	Ad	Ad	AA	AA	AA	AA	AA	AA	AA	Ad	AA	AA	Ad	AA	AA	Ad	Ad	AA	Ad	Ad	Ad	Ad	AA
chr1D	111029001	111033000	4000	dd	dd	dd	dd	dd	dd	dd	dd	dd	dd	dd	dd	dd	dd	dd	dd	dd	dd	dd	dd	dd	dd	dd	dd	dd	dd	dd	dd	dd	dd	dd	dd	dd	dd	dd	dd	dd	dd	dd	dd	dd	dd	dd	dd	dd	dd
chr1D	111067001	111079500	12500	AA	AA	dd	Ad	Ad	AA	Ad	AA	AA	AA	AA	AA	AA	AA	AA	AA	AA	Ad	AA	AA	AA	AA	AA	AA	AA	Ad	AA	Ad	Ad	AA	Ad	AA	Ad	AA	AA	Ad	AA	Ad	Ad	Ad	AA	Ad	AA	Ad	Ad	Ad
chr1D	111161501	111171500	10000	Ad	Ad	dd	Ad	Ad	Ad	Ad	Ad	Ad	Ad	Ad	Ad	Ad	Ad	Ad	Ad	Ad	Ad	Ad	Ad	Ad	dd	dd	Ad	Ad	Ad	Ad	Ad	Ad	Ad	Ad	Ad	Ad	Ad	Ad	Ad	Ad	Ad	Ad	Ad	Ad	Ad	dd	Ad	Ad	Ad
chr1D	111167501	111172000	4500	Ad	Ad	dd	Ad	Ad	Ad	Ad	Ad	dd	dd	Ad	Ad	Ad	Ad	Ad	Ad	Ad	Ad	Ad	Ad	Ad	dd	dd	Ad	Ad	Ad	Ad	dd	Ad	Ad	Ad	Ad	Ad	Ad	Ad	dd	Ad	Ad	Ad	Ad	Ad	Ad	dd	dd	dd	dd
chr1D	111520501	111526500	6000	AA	AA	dd	AA	AA	AA	AA	AA	AA	AA	AA	AA	AA	AA	AA	AA	AA	Ad	AA	AA	AA	AA	AA	AA	AA	AA	AA	Ad	AA	Ad	AA	AA	AA	AA	AA	AA	AA	AA	AA	AA	AA	AA	AA	AA	AA	AA
chr1D	111574501	111585500	11000	AA	AA	dd	Ad	AA	AA	AA	AA	AA	AA	AA	AA	AA	AA	AA	AA	AA	AA	AA	AA	AA	AA	AA	AA	AA	AA	AA	AA	AA	AA	AA	AA	AA	AA	AA	AA	AA	Ad	Ad	AA	AA	Ad	AA	Ad	AA	Ad
chr1D	111638501	111646000	7500	AA	AA	dd	AA	AA	AA	AA	AA	AA	AA	AA	AA	AA	AA	Ad	AA	AA	AA	AA	AA	AA	AA	Ad	AA	AA	AA	AA	AA	AA	AA	AA	AA	AA	AA	AA	AA	AA	Ad	AA	Ad	AA	AA	AA	AA	AA	AA
chr1D	111740501	111745000	4500	AA	AA	dd	AA	AA	AA	AA	AA	AA	AA	AA	AA	AA	AA	AA	AA	AA	AA	Ad	AA	AA	AA	AA	AA	AA	AA	AA	Ad	AA	AA	AA	AA	AA	Ad	AA	AA	AA	Ad	Ad	AA	AA	Ad	Ad	Ad	Ad	AA
chr1D	111773001	111777500	4500	AA	AB	dd	AA	AA	AA	AA	AA	AA	AA	AB	AA	AA	AA	AA	AA	AA	Ad	AA	AA	AA	AA	AA	AA	AA	AA	AA	AA	AA	AA	AA	AA	AA	AA	AA	AA	AA	AA	AA	AA	AA	AA	AA	AA	AA	AA
chr1D	111898501	111904500	6000	AA	AA	dd	AA	AA	AA	AA	AA	AA	AA	AA	AA	AA	AA	AA	AA	AA	AA	AA	AA	AA	AA	AA	AA	AA	AA	AA	AA	AA	AA	AA	AA	AA	AA	AA	AA	AA	AA	AA	AA	AA	AA	AA	AA	Ad	AA
chr1D	111910001	111916000	6000	AA	AA	dd	AA	AA	AA	AA	AA	AA	AA	AA	AA	AA	AA	AA	AA	AA	AA	AA	AA	AA	AA	AA	AA	Ad	AA	AA	AA	AA	AA	AA	AA	AA	AA	AA	Ad	AA	AA	AA	AA	AA	AA	AA	AA	Ad	AA
chr1D	112056001	112068500	12500	AA	AA	dd	AA	AA	AA	Ad	AA	AA	AA	AA	AA	AA	AA	AA	AA	AA	AA	AA	AA	AA	AA	AA	AA	AA	AA	AA	AA	AA	AA	AA	AA	AA	AA	AA	Ad	AA	Ad	Ad	Ad	AA	Ad	Ad	Ad	Ad	Ad
chr1D	112098001	112104500	6500	AB	AB	dd	AB	AA	AA	AA	AA	AA	AB	AA	AA	AA	AA	AA	AA	AB	AA	AA	AB	AA	AA	AA	AA	AA	AA	AA	AA	AA	AA	AB	AB	AB	AA	AA	Ad	AA	Ad	AA	AA	AA	Ad	Ad	Ad	AA	Ad
chr1D	112168001	112175500	7500	Ad	Ad	Ad	Ad	AA	AA	AA	Ad	Ad	AA	AA	AA	Ad	Ad	Ad	Ad	Ad	Ad	Ad	Ad	AA	AA	Ad	AA	AA	AA	AA	Ad	Ad	Ad	AA	Ad	Ad	AA	Ad	AA	AA	AB	AA	AA	AA	AA	Ad	AA	AA	AA
chr1D	112487001	112491000	4000	AA	AA	dd	AA	AA	AA	AA	Ad	AA	AA	AA	AA	Ad	AA	AA	AA	AA	Ad	AA	AA	AA	AA	AA	AA	AA	AA	AA	AA	Ad	AA	AA	Ad	Ad	AA	Ad	AA	AA	Ad	AA	AA	AA	AA	AA	AA	AA	AA
chr1D	112755001	112762500	7500	AA	Ad	dd	AA	AA	Ad	AA	Ad	Ad	Ad	Ad	AA	AA	AA	Ad	AA	AA	Ad	Ad	Ad	Ad	AA	AA	AA	Ad	Ad	AA	AA	Ad	AA	AA	Ad	AA	AA	AA	Ad	AA	Ad	Ad	Ad	AA	Ad	Ad	Ad	Ad	Ad
chr1D	112825001	112850000	25000	AA	AA	dd	AA	AA	AA	AA	AA	AA	AA	AA	AA	AA	AA	AA	AA	AA	Ad	AA	AA	AA	AA	AA	AA	AA	AA	AA	AA	AA	AA	AA	AA	AA	AA	Ad	Ad	AA	AA	Ad	Ad	AA	Ad	AA	Ad	Ad	Ad
chr1D	112858001	112862500	4500	AA	AA	dd	AA	AA	AA	AA	AA	AA	AA	AA	AA	AA	AA	AA	AA	AA	AA	AA	AA	AA	AA	AA	AA	AA	AA	AA	AA	AA	AA	AA	AA	AA	AA	AA	AA	AA	Ad	AA	AA	AA	AA	AA	Ad	AA	AA
chr1D	112970001	112976000	6000	AA	AA	dd	AA	AA	AA	AA	AA	AA	AA	AA	AA	AA	dd	AA	AA	AA	AA	AA	AA	AA	dd	dd	AA	AA	AA	AA	AA	AA	dd	AA	AA	AA	AA	AA	AB	AA	AA	AA	AA	AA	AA	AA	AA	AA	AA
chr1D	113048001	113062000	14000	AB	AB	dd	AB	BB	AB	AB	AB	AB	AB	BC	BC	AB	AB	AB	BC	AB	BB	BC	AB	AB	AB	BC	BC	BC	AB	AB	BB	AB	AB	AB	BB	AB	AB	BB	BC	M	BB	AB	BC	BC	AB	AA	AB	BC	AB
chr1D	113076501	113093500	17000	AA	AB	dd	AB	AB	AB	BB	AB	AB	BC	BB	BC	AB	AB	AB	BB	AB	AB	BB	AB	AB	AA	AB	AB	AB	AB	AA	BB	AA	AB	AA	BB	AB	AB	AB	BC	M	AB	AB	BB	AB	BB	AA	AA	BB	BB
chr1D	113152001	113157000	5000	AB	AB	dd	AB	AB	AB	BB	BB	BB	BB	AB	BB	BB	BB	AB	BB	BB	BB	AB	AB	BB	AB	BB	BB	AB	AB	BB	AB	AB	BC	AB	BB	AB	AB	AB	AA	AA	AB	AB	AB	BB	AB	AB	AB	AB	AB
chr1D	113213501	113227500	14000	AB	AB	dd	AB	AA	AB	AB	AB	AB	AB	AB	AA	AB	AB	AB	AB	AB	AB	AA	AB	AB	AB	AB	AA	AB	AB	AB	AB	AA	AB	AB	AA	BB	AB	AB	AA	BB	AA	AA	AA	AA	AA	AA	AA	AA	Ad
chr1D	113280001	113287500	7500	AA	AA	dd	AA	AA	AA	AA	AA	AA	AA	AA	AA	AA	AA	AA	AA	AA	AA	AB	AA	AB	AA	AA	AA	AA	AA	AB	AA	AA	AA	AA	AA	AA	AA	AA	AA	AA	AB	AA	AA	AA	AA	AB	AA	AA	AA
chr1D	113333001	113340000	7000	Ad	AA	dd	AA	AA	AA	AA	AA	AA	AA	AA	AA	AA	AA	AA	AA	AA	AA	AA	AA	AA	AA	AA	AA	AA	AA	AA	AA	AA	AA	AA	AA	AA	AA	AA	AA	AA	AA	AA	AA	AA	AA	AA	AA	AA	AA
chr1D	113355501	113360500	5000	AB	AB	dd	AB	BB	AA	AB	AB	AB	AB	AB	BB	BB	AB	AB	AB	AB	AB	BB	AB	AB	AB	AB	AB	BB	BB	AB	AB	AB	AB	AB	BB	AB	AA	BB	AB	M	AB	AB	BB	AB	AB	AA	AB	AA	AB
chr1D	113456001	113462000	6000	AA	AA	dd	AA	AA	AA	AA	AA	AA	AA	AA	AA	AA	AA	AA	AA	AA	AA	AA	AA	AA	AA	AA	AA	AA	AA	AA	AA	AA	AA	AA	AA	AA	AA	AA	Ad	AA	AA	AA	AA	AA	AA	AA	AA	AA	AA
chr1D	113562501	113569000	6500	AA	AA	dd	AA	AA	AA	AA	AA	AA	AA	AA	AA	AA	AA	AA	AA	AA	AA	AA	AA	AA	AA	AA	AA	AA	AA	AA	AA	AA	AA	AA	AA	AA	AA	AA	AB	AA	AB	AA	AB	AA	AA	AA	AA	AA	AA
chr1D	113809501	113814000	4500	Ad	AA	dd	AA	Ad	AA	AA	Ad	AA	AA	Ad	AA	AA	AA	AA	AA	AA	AA	AA	AA	AA	AA	AA	Ad	AA	AA	AA	AA	AA	AA	AA	AA	AA	AA	AA	Ad	AA	AA	Ad	Ad	Ad	Ad	Ad	Ad	Ad	Ad
chr1D	113884001	113896000	12000	Ad	Ad	dd	Ad	Ad	Ad	Ad	Ad	Ad	Ad	Ad	Ad	Ad	Ad	Ad	Ad	Ad	Ad	Ad	Ad	Ad	Ad	Ad	Ad	Ad	Ad	Ad	Ad	Ad	Ad	Ad	Ad	Ad	Ad	Ad	Ad	Ad	Ad	Ad	Ad	Ad	Ad	Ad	Ad	Ad	Ad
chr1D	114098501	114104000	5500	AA	AA	dd	AA	AA	AA	AA	AA	AA	AA	AA	AA	Ad	AA	AA	AA	AA	AA	AA	AA	AA	AA	AA	AA	AA	AA	AA	AA	AA	AA	AA	AA	AA	AA	AA	AA	AA	AA	Ad	AA	AA	Ad	AA	AA	AA	Ad
chr1D	114175501	114181500	6000	AA	AA	dd	AA	AA	AA	AA	AA	AA	AA	AA	AA	AA	AA	AA	AA	AA	AA	AA	AA	AA	AA	AA	AA	AA	AA	AA	AA	AA	AA	Ad	AA	AA	AA	AA	Ad	Ad	Ad	AA	Ad	AA	Ad	AA	Ad	Ad	Ad
chr1D	114189001	114196000	7000	AA	AA	dd	AA	AA	AA	AA	AA	Ad	AA	AA	AA	AA	AA	AA	AA	AA	AA	AA	AA	AA	AA	AA	AA	AA	AA	AA	AA	AA	AA	AA	AA	AA	AA	AA	AA	Ad	AA	Ad	AA	AA	AA	AA	AA	AA	AA
chr1D	114274501	114282500	8000	AA	AA	dd	AA	AA	AA	AA	AA	AA	AA	AA	AA	AA	AA	AA	AA	Ad	AA	Ad	AA	AA	AA	AA	Ad	Ad	AA	AA	Ad	AA	Ad	AA	AA	Ad	AA	Ad	Ad	Ad	Ad	Ad	Ad	Ad	Ad	Ad	Ad	Ad	Ad
chr1D	114469001	114479500	10500	AA	AA	AA	AA	AA	AA	AA	AA	AA	AA	AA	AA	AA	AA	AA	AA	AA	AA	AA	AA	AA	AA	AA	AA	AA	AA	AA	AB	AA	AA	AA	AA	AA	AA	AA	Ad	dd	AA	AA	Ad	AA	AA	AA	AA	AA	AA
chr1D	114566501	114571500	5000	AA	AA	dd	AB	AA	AA	AA	AA	AA	AB	AA	AA	AA	AA	AA	AA	AA	AA	AA	AA	AA	AA	AA	AA	AA	AA	AA	AA	AA	AA	AA	AA	Ad	AA	AA	AB	AA	AA	AA	AB	AA	AA	AA	AA	AA	AA
chr1D	114678501	114685000	6500	AA	AA	dd	AA	AA	AA	AA	AA	AA	AA	AA	AA	AA	AA	AA	AA	AA	AA	AA	AA	AA	AA	AA	AA	AA	AA	AA	AA	AA	AA	AA	AA	AA	AA	AA	AA	Ad	Ad	Ad	Ad	AA	Ad	Ad	Ad	AA	AA
chr1D	114706501	114715500	9000	Ad	AA	dd	AA	AA	AA	AA	AA	AA	AA	AA	AA	AA	AA	AA	AA	AA	AA	AA	AA	AA	AA	AA	AA	AA	AA	AA	AA	AA	AA	AA	AA	AA	AA	AA	Ad	AA	Ad	Ad	AA	AA	Ad	AA	AA	Ad	Ad
chr1D	114754501	114760500	6000	AA	AA	dd	AA	AA	AA	AA	AA	AA	AA	AA	AA	AA	AA	Ad	AA	AA	AA	AA	AA	AA	AA	AA	AA	AA	AA	AA	AA	AA	AA	AA	Ad	AA	AA	AA	AA	AA	AA	AA	AA	AA	AA	AA	AA	AA	AA
chr1D	114795501	114803500	8000	AA	AA	dd	Ad	Ad	Ad	Ad	Ad	Ad	Ad	Ad	Ad	AA	Ad	Ad	Ad	Ad	Ad	Ad	Ad	AA	AA	AA	Ad	Ad	Ad	Ad	Ad	Ad	AA	Ad	Ad	Ad	Ad	Ad	Ad	Ad	Ad	Ad	Ad	Ad	Ad	Ad	Ad	Ad	Ad
chr1D	114825501	114829500	4000	AA	dd	dd	AA	Ad	Ad	Ad	Ad	Ad	Ad	Ad	Ad	AA	Ad	dd	AA	Ad	AA	Ad	Ad	Ad	Ad	AA	AA	Ad	Ad	Ad	AA	AA	Ad	Ad	AA	Ad	AA	AA	Ad	dd	Ad	dd	Ad	Ad	Ad	Ad	Ad	Ad	Ad
chr1D	114932001	114939500	7500	AA	AA	dd	AA	AA	AA	AA	AA	AA	AA	AA	AA	AA	AA	AA	AA	AA	AA	AA	AA	AA	AA	AA	AA	AA	AA	AB	AA	AA	AA	AA	AA	AA	AA	AA	Ad	AA	AA	Ad	AA	AA	AA	AA	AA	AA	AA
chr1D	115221501	115226000	4500	AA	AA	dd	AA	AA	AA	AA	AA	AA	AA	AA	AA	AA	AA	AA	AA	AA	AA	AB	AA	AA	AA	AA	AA	AA	AA	AA	AA	AA	AA	AA	AA	AA	AA	AA	AA	AA	AA	AA	AA	AA	AA	AB	AA	AA	AA
chr1D	115537501	115550000	12500	AA	AA	dd	AA	AA	AA	AA	Ad	AA	AA	AA	AA	AA	AA	AA	AA	AA	AA	AA	AA	AA	AA	AA	AA	AA	AA	AA	AA	AA	AA	AA	AA	AA	AA	AA	Ad	AA	Ad	Ad	Ad	AA	AA	AA	Ad	Ad	Ad
chr1D	115690501	115697000	6500	AA	AA	dd	AA	AA	AA	AA	AA	AA	AA	AA	AA	AA	AA	AA	AA	AA	AA	AA	AA	AA	AA	AA	AA	AA	AA	AA	AA	AA	AA	AA	AA	AA	AA	AA	AA	Ad	Ad	Ad	AA	AA	Ad	AA	AA	AA	Ad
chr1D	115921501	115926000	4500	AB	AA	dd	AB	AA	AA	AA	AA	AA	AA	AA	AA	AA	AA	AA	Ad	AA	AA	AA	AA	AA	AA	AA	AA	AA	AA	AA	AB	AA	AA	AA	AA	AA	AA	AA	AA	AA	AA	AA	AA	AA	AA	AA	AA	AA	AA
chr1D	116181001	116186500	5500	Ad	Ad	dd	Ad	Ad	Ad	Ad	dd	Ad	Ad	Ad	Ad	Ad	Ad	Ad	dd	Ad	dd	Ad	Ad	Ad	Ad	Ad	Ad	Ad	Ad	Ad	Ad	Ad	Ad	Ad	dd	dd	dd	dd	dd	dd	dd	dd	dd	Ad	dd	Ad	dd	dd	dd
chr1D	116345001	116357500	12500	AA	AA	AA	AA	AA	AA	AA	AA	AA	AA	AA	AA	AA	AA	AA	AA	AA	AA	AA	AA	AA	AA	AA	AA	AA	AA	AA	AA	AA	AA	AA	AA	AA	AA	AA	AA	dd	AA	AA	AA	AA	AA	AA	AA	AA	AA
chr1D	116576501	116587000	10500	AA	AA	dd	AA	AA	Ad	AA	AA	AA	AA	AA	AA	AA	Ad	AA	AA	AA	AA	AA	AA	AA	AA	AA	AA	AA	AA	AA	AA	Ad	AA	AA	AA	AA	AA	AA	AA	AA	AA	Ad	AA	AA	AA	AA	AA	Ad	Ad
chr1D	116611501	116624000	12500	Ad	AA	dd	AA	AA	AA	AA	AA	AA	AA	AA	AA	AA	AA	AA	AA	Ad	Ad	AA	AA	AA	AA	AA	AA	Ad	AA	AA	AA	AA	AA	AA	AA	Ad	AA	AA	Ad	Ad	AA	Ad	Ad	AA	Ad	Ad	Ad	Ad	Ad
chr1D	116767501	116774000	6500	AA	Ad	dd	AA	AA	AA	AA	AA	AA	Ad	AA	AA	Ad	AA	AA	AA	Ad	AA	Ad	AA	Ad	AA	AA	AA	AA	AA	AA	AA	AA	AA	AA	AA	AA	Ad	AA	Ad	AA	Ad	Ad	AA	AA	AA	Ad	AA	Ad	Ad
chr1D	116837501	116842500	5000	AA	AA	Ad	AA	AA	AA	AA	AA	Ad	AA	AA	AB	AA	AA	AA	AA	AB	AA	AA	AA	AA	AA	AB	AA	AA	AA	AA	AA	AA	AA	AA	AA	AB	AA	AA	AA	dd	Ad	AA	AA	AA	AA	AA	AA	AA	AA
chr1D	117258001	117264500	6500	Ad	dd	dd	Ad	dd	Ad	Ad	dd	dd	dd	dd	dd	dd	dd	dd	dd	Ad	dd	Ad	dd	dd	dd	dd	Ad	dd	dd	dd	Ad	dd	Ad	dd	dd	Ad	Ad	Ad	dd	dd	dd	dd	dd	Ad	dd	dd	dd	dd	dd
chr1D	117270001	117279000	9000	AA	AA	dd	AA	AA	AA	AA	AA	AA	AA	AA	AA	AA	AA	AA	AA	AA	AA	AA	AA	AA	AA	AA	AA	AA	AA	AA	AA	AA	AA	AA	AA	AA	AA	AA	Ad	AA	AA	AA	AA	AA	AA	AA	AA	AA	AA
chr1D	117420001	117425000	5000	AA	AA	dd	AA	AA	AA	AA	AA	AA	AA	AA	AA	AA	AA	AA	AA	AA	AA	AA	AA	AA	AA	AA	AA	AA	AA	AA	AA	AB	AA	AA	AA	AA	AA	AA	AA	AA	AA	AA	AA	AA	AA	AA	AA	AA	AA
chr1D	117447501	117582500	135000	AA	AA	dd	AA	AA	AA	AA	AA	AA	AA	AA	AA	AA	AA	AA	AA	AA	AA	AA	AA	AA	AA	AA	AA	AA	AA	AA	AA	AA	AA	AA	AA	AA	AA	AA	AA	AA	AA	AA	AA	AA	AA	AA	AA	AA	AA
chr1D	117612501	117620500	8000	Ad	AA	dd	Ad	Ad	Ad	Ad	AA	Ad	Ad	Ad	Ad	AA	AA	Ad	AA	Ad	AA	Ad	AA	AA	Ad	AA	Ad	Ad	AA	AA	Ad	AA	Ad	AA	AA	AA	AA	AA	Ad	Ad	Ad	Ad	Ad	AA	Ad	Ad	Ad	Ad	Ad
chr1D	117709501	117714000	4500	AA	AA	dd	AA	AA	AB	AA	AA	AA	AB	AA	AA	AA	AA	AA	AA	AA	AA	AA	AA	AA	AA	AA	AA	AA	AA	AA	AB	AA	AA	AA	AA	AA	AA	AA	AA	AA	AA	AA	Ad	AA	AA	AA	AA	AA	AA
chr1D	117718001	117722000	4000	AA	AA	dd	AA	AA	AA	AA	AB	AA	AA	AB	AA	AA	AA	AA	AA	AA	AA	AA	AA	AA	AA	AB	AA	AA	AA	AA	AA	AA	AA	AA	AA	AA	AA	AA	AB	Ad	AA	AA	Ad	AA	Ad	AB	AA	AA	AA
chr1D	117830001	117834000	4000	Ad	Ad	dd	Ad	Ad	AA	Ad	Ad	AA	Ad	Ad	Ad	Ad	Ad	Ad	Ad	Ad	Ad	Ad	Ad	Ad	Ad	Ad	Ad	Ad	Ad	Ad	Ad	Ad	Ad	AA	Ad	Ad	Ad	Ad	dd	Ad	Ad	Ad	Ad	Ad	Ad	Ad	Ad	Ad	Ad
chr1D	117841001	117847500	6500	AA	AA	dd	AA	Ad	AA	AA	AA	AA	AA	AA	AA	AA	AA	AA	AA	AA	AA	AA	AA	Ad	AA	AA	AA	AA	AA	AA	AA	AA	AA	AA	AA	AA	Ad	AA	Ad	AA	Ad	Ad	Ad	AA	Ad	Ad	Ad	Ad	AA
chr1D	117953501	117974500	21000	AA	AA	dd	AA	AA	AA	AA	AA	AA	AA	AA	AA	AA	AA	AA	AA	AA	AA	AA	AA	AA	AA	AA	AA	AA	AA	AA	AA	AA	AA	AA	AA	AA	AA	AA	AA	AA	AA	AA	AA	AA	AA	AA	AA	AA	AA
chr1D	118102501	118107500	5000	Ad	AA	dd	AA	AA	AA	AA	AA	AA	AA	Ad	Ad	AA	AA	Ad	AA	AA	AA	Ad	AA	AA	AA	AA	AA	AA	AA	Ad	Ad	AA	AA	AA	Ad	AA	AA	Ad	AA	Ad	Ad	Ad	AA	AA	Ad	Ad	Ad	Ad	Ad
chr1D	118136501	118141000	4500	Ad	dd	dd	Ad	Ad	dd	Ad	Ad	Ad	Ad	Ad	Ad	dd	dd	dd	Ad	dd	dd	Ad	dd	Ad	dd	Ad	dd	dd	Ad	Ad	dd	Ad	Ad	Ad	Ad	Ad	Ad	Ad	dd	dd	Ad	dd	dd	Ad	dd	dd	dd	dd	dd
chr1D	118211501	118225000	13500	AA	AA	dd	AA	AA	AA	AA	AA	AA	AA	AA	AA	AA	AA	AA	AA	AA	AA	AA	AA	AA	AA	AA	AA	AA	AA	AA	AA	AA	AA	AA	AA	AA	AA	AA	AA	AA	AA	AA	AA	AA	AA	AA	AA	AA	AA
chr1D	118381001	118392000	11000	Ad	Ad	dd	AA	Ad	AA	Ad	Ad	AA	AA	Ad	AA	AA	Ad	AA	Ad	AA	AA	Ad	AA	Ad	AA	AA	AA	Ad	AA	AA	AA	AA	Ad	Ad	Ad	AA	AA	AA	Ad	dd	Ad	Ad	Ad	Ad	Ad	Ad	Ad	Ad	Ad
chr1D	118418001	118429500	11500	dd	AA	AA	AA	AA	AA	AA	AA	AA	AA	AA	AA	AA	AA	AA	AA	AA	AA	AA	AA	AA	AA	AB	AA	AA	AA	AA	AB	AA	AA	AB	AA	AA	AA	AA	Ad	AA	AB	AA	Ad	AA	AA	AA	AA	AA	AB
chr1D	119114001	119123500	9500	AA	AA	dd	AA	AA	AA	AA	AA	AA	AA	AA	AA	AA	AA	AA	AA	AA	AA	AA	AA	AA	AA	AA	AA	AA	AA	AA	AA	AA	AA	AA	AA	AA	AA	AA	AA	AA	AA	AA	AA	AA	AA	AA	AA	AA	AA
chr1D	119280001	119284000	4000	Ad	Ad	dd	Ad	Ad	Ad	Ad	Ad	AA	Ad	Ad	Ad	Ad	Ad	AA	Ad	Ad	Ad	Ad	Ad	Ad	Ad	Ad	Ad	Ad	Ad	Ad	Ad	Ad	Ad	Ad	AA	AA	Ad	Ad	Ad	Ad	Ad	Ad	Ad	Ad	Ad	Ad	Ad	Ad	Ad
chr1D	119422001	119436500	14500	AA	AA	dd	AA	AA	AA	AA	AA	AA	AA	AA	AA	AA	AA	AA	AA	AA	AA	AA	AA	AA	AA	AA	AA	AA	AA	AA	AA	AA	AA	AA	AA	AA	AA	AA	AB	AA	AA	AA	AA	AA	AA	AA	AA	AA	AA
chr1D	119646001	119654000	8000	AA	AA	dd	AA	AA	AA	AA	AA	AA	AA	AA	AA	AA	AA	AA	AA	AA	AA	AA	AA	AA	AA	AA	AA	AA	AA	AA	AA	AA	AA	AA	AA	AA	AA	AA	AA	AA	AA	AA	AA	AA	AA	AA	AA	AA	AA
chr1D	119699001	119705500	6500	AA	AA	dd	AA	AA	AA	AA	AA	AA	AA	AA	AA	AA	AA	AA	AA	AA	AA	AA	AA	AA	AA	AA	Ad	AA	AA	AA	BB	AA	AA	AA	AA	AA	AB	AA	dd	AA	AB	AA	Ad	AA	AA	AA	AA	AA	AA
chr1D	119913501	119919000	5500	AA	AA	dd	Ad	AA	Ad	Ad	AA	Ad	Ad	AA	AA	Ad	Ad	Ad	AA	Ad	Ad	AA	AA	Ad	Ad	Ad	Ad	Ad	AA	Ad	Ad	Ad	Ad	Ad	AA	AA	AA	AA	AA	AA	AA	Ad	Ad	AA	Ad	Ad	Ad	Ad	AA
chr1D	120133501	120145500	12000	AA	AA	dd	AA	AA	AA	AA	AA	AA	AA	AA	AA	AA	AA	AA	AA	AA	AA	AA	AA	AA	AA	AA	AA	AA	AA	AA	Ad	AA	AA	AA	AA	AA	AA	AA	Ad	Ad	Ad	Ad	Ad	AA	Ad	Ad	AA	Ad	Ad
chr1D	120415001	120419000	4000	dd	AA	AA	AB	AB	AB	AB	AA	AA	dd	AA	AA	AA	AA	AA	AA	AA	AA	AA	dd	AA	AB	AA	AA	AA	dd	AA	AA	dd	AB	Ad	AA	AA	AB	AA	AA	AA	dd	AA	AA	AA	AA	AA	AA	AA	AA
chr1D	120475001	120500500	25500	AA	AA	dd	AA	AA	AA	AA	AA	AA	AA	AA	AA	AA	AA	AA	AA	AA	AA	AA	AA	AA	AA	AA	AA	AA	AA	AA	AA	AA	AA	AA	AA	AA	AA	AA	Ad	AA	AA	AA	Ad	AA	AA	AA	AA	Ad	AA
chr1D	120556501	120560500	4000	AB	AB	dd	AB	BB	BB	BB	AB	AB	AB	BB	BB	BB	AB	BB	AB	AB	AB	BB	AB	BB	AB	BB	BB	BB	BB	BB	BB	BB	AB	AB	BB	AB	AB	BB	BC	M	AB	AB	BB	BB	AB	M	AB	BB	BC
chr1D	121120501	121128500	8000	AA	AA	dd	AA	AA	AA	AA	AA	AA	AA	AA	AA	AA	AA	AA	AA	AA	AA	AA	AA	Ad	AA	AA	AA	AA	AA	AA	AA	AA	AA	AA	AA	AA	AA	AA	Ad	Ad	Ad	Ad	Ad	AA	Ad	Ad	Ad	Ad	Ad
chr1D	121159501	121168000	8500	Ad	Ad	dd	Ad	Ad	Ad	Ad	Ad	Ad	Ad	Ad	Ad	Ad	Ad	Ad	Ad	Ad	Ad	Ad	Ad	Ad	Ad	Ad	Ad	Ad	AA	Ad	Ad	Ad	Ad	Ad	Ad	Ad	Ad	Ad	dd	dd	Ad	Ad	Ad	Ad	Ad	Ad	Ad	Ad	dd
chr1D	121190001	121194000	4000	AA	AA	dd	AA	AA	AA	AA	AA	AA	AA	AA	AA	AA	AA	AA	AA	AA	AA	AA	AA	AA	AA	AA	AA	AA	AA	AB	Ad	AA	AA	AA	AA	AA	AA	AA	AB	AA	AA	AA	AA	AA	AA	AA	AA	AA	AA
chr1D	121370001	121378500	8500	AA	AA	Ad	AA	AA	AA	AA	AB	AA	AA	AA	AA	AA	AA	AA	AA	AA	AA	AA	AA	AA	AA	AA	AA	AA	AA	AA	AA	AA	AB	AA	AA	AA	AA	AA	AA	dd	AA	AA	AA	AA	AA	AA	AA	AA	AA
chr1D	121716001	121721500	5500	AA	AA	dd	AA	AA	AA	AA	AA	AA	AA	AA	AA	AA	AA	AA	AA	AA	AA	AA	AB	AA	AB	AA	AA	AA	AA	AA	AA	AA	AA	AA	AA	AA	AA	AA	AA	AB	AB	AA	AA	AA	AA	AA	AA	AA	AA
chr1D	121767001	121778000	11000	dd	AA	AA	AA	AA	AA	AA	AA	AA	AA	AA	AA	AA	AA	AA	AA	AA	AA	AA	AA	AA	AA	AA	AA	AA	AA	AA	AA	AA	AA	AA	AA	AA	AA	AA	AA	AA	AA	AA	AA	AA	AA	AA	AA	AA	AA
chr1D	121785001	121792500	7500	AA	AA	dd	AA	AA	Ad	Ad	AA	Ad	AA	Ad	AA	AA	AA	AA	AA	AA	AA	AA	Ad	AA	AA	AA	AA	AA	AA	AA	Ad	AA	AA	AA	AA	AA	AA	AA	Ad	Ad	Ad	Ad	Ad	AA	Ad	Ad	Ad	Ad	Ad
chr1D	121826001	121838500	12500	dd	dd	dd	dd	Ad	Ad	dd	Ad	dd	Ad	dd	dd	Ad	Ad	dd	Ad	Ad	Ad	dd	Ad	Ad	dd	Ad	Ad	Ad	Ad	dd	dd	dd	Ad	Ad	Ad	dd	Ad	Ad	dd	dd	dd	dd	dd	Ad	dd	dd	dd	dd	dd
chr1D	122001001	122011500	10500	AA	AA	dd	AA	AA	AA	AA	AA	AA	AA	AA	AA	AA	AA	AA	AA	AA	AA	AA	AA	AA	AA	AA	AA	AA	AA	AA	AB	AA	AA	AA	AA	AA	AA	AA	Ad	Ad	AA	AA	Ad	AA	Ad	AA	Ad	AA	Ad
chr1D	122215001	122219000	4000	AA	AA	dd	AA	AA	AA	AA	AA	AA	Ad	AA	AA	AA	AA	AA	AA	AA	AA	AA	AA	AA	AA	AA	AA	AA	AA	AA	AA	AA	AA	AA	AA	AA	AA	AA	AA	Ad	Ad	AA	AA	AA	AA	AA	AA	AA	AA
chr1D	122225501	122230000	4500	AA	Ad	dd	AA	AA	AA	AA	AA	AA	AA	AA	AA	AA	AA	AA	AA	Ad	Ad	AA	Ad	AA	AA	AA	AA	AA	AA	AA	Ad	AA	AA	AA	AA	AA	Ad	AA	Ad	Ad	Ad	Ad	Ad	AA	Ad	AA	AA	Ad	Ad
chr1D	122267001	122274500	7500	AA	AA	dd	Ad	AA	Ad	Ad	AA	Ad	AA	Ad	Ad	AA	Ad	Ad	Ad	Ad	Ad	AA	Ad	Ad	Ad	Ad	Ad	Ad	Ad	AA	Ad	Ad	Ad	Ad	Ad	Ad	Ad	Ad	Ad	Ad	Ad	Ad	Ad	Ad	Ad	Ad	Ad	Ad	Ad
chr1D	122338501	122352500	14000	AA	AA	dd	AA	AA	AA	AA	AA	AA	AA	AA	AA	AA	AA	AA	AA	AA	AA	AA	AA	AA	AA	AA	AA	AA	AA	AA	AA	AA	AA	AA	AA	AA	AA	AA	AB	AA	AA	AA	AA	AA	AA	AA	AA	AA	AA
chr1D	122449501	122463500	14000	Ad	dd	dd	Ad	Ad	Ad	dd	dd	Ad	dd	Ad	Ad	Ad	dd	Ad	Ad	Ad	Ad	Ad	dd	Ad	Ad	Ad	Ad	Ad	dd	dd	dd	dd	dd	dd	dd	dd	dd	Ad	dd	dd	dd	dd	dd	Ad	dd	dd	dd	dd	dd
chr1D	122472501	122485500	13000	AA	AA	dd	AA	AA	AA	AA	AA	AA	AA	AA	AA	AA	AA	AA	AA	AA	AA	AA	AA	AA	AA	AA	AA	AA	AA	AA	AA	AA	AA	AA	AA	AA	AA	AA	Ad	Ad	Ad	AA	AA	AA	Ad	AA	AA	Ad	AA
chr1D	122514001	122518000	4000	Ad	AA	dd	Ad	AA	AA	AA	AA	AA	Ad	AA	AA	AA	AA	Ad	Ad	Ad	Ad	Ad	AA	AA	Ad	Ad	AA	Ad	Ad	AA	Ad	AA	AA	AA	Ad	AA	AA	Ad	Ad	Ad	Ad	Ad	Ad	AA	Ad	AA	Ad	Ad	Ad
chr1D	122569501	122573500	4000	AA	AA	dd	AA	AA	AA	AA	AA	AA	AA	AA	AA	AA	AA	AA	AA	AB	AA	AB	AA	AA	AA	AA	AA	AA	AA	AA	AA	AA	AA	AA	AA	AA	AA	AA	AA	dd	AA	AA	AA	AA	AA	AA	AA	AA	AA
chr1D	122646501	122660000	13500	AA	AA	AA	AA	AA	AA	AA	AA	AA	AA	AA	AA	AA	AA	AA	AA	AA	AA	AA	AA	AA	AA	AA	AA	AA	AA	AA	AA	AA	AA	AA	AA	AA	AA	AA	AA	dd	AB	AA	AA	AA	AA	AA	AA	AA	AB
chr1D	123086001	123090000	4000	Ad	Ad	dd	Ad	AA	Ad	Ad	Ad	Ad	Ad	Ad	Ad	Ad	Ad	Ad	Ad	Ad	Ad	Ad	Ad	Ad	Ad	Ad	Ad	Ad	Ad	Ad	Ad	Ad	Ad	AA	Ad	Ad	Ad	Ad	Ad	Ad	Ad	Ad	dd	Ad	Ad	Ad	Ad	Ad	Ad
chr1D	123293001	123300500	7500	AA	AA	dd	Ad	Ad	AA	Ad	Ad	Ad	Ad	Ad	Ad	Ad	Ad	AA	Ad	Ad	AA	Ad	AA	AA	AA	Ad	Ad	Ad	Ad	Ad	Ad	AA	AA	AA	Ad	AA	AA	Ad	Ad	dd	Ad	dd	Ad	Ad	Ad	Ad	Ad	Ad	Ad
chr1D	123330001	123334500	4500	AA	AA	dd	AA	AA	Ad	AA	AA	AA	AA	AA	AA	Ad	AA	AA	AA	AA	AA	AA	AA	AA	AA	AA	AA	AA	AA	Ad	AA	AA	AA	AA	AA	Ad	AA	AA	Ad	Ad	AA	AA	AA	AA	Ad	AA	Ad	AA	AA
chr1D	123615501	123621500	6000	AA	AA	dd	AA	AA	AA	AA	AA	AA	AA	AA	AA	AA	AA	AA	AA	AA	AA	AA	AA	AA	AA	AA	AA	AA	AA	AA	AA	AA	AA	AA	AA	AA	AA	AA	AA	AA	AA	AA	AA	AA	AA	AA	AA	AA	AA
chr1D	123647001	123659500	12500	AA	Ad	dd	AA	AA	Ad	Ad	Ad	AA	AA	AA	AA	AA	Ad	AA	AA	AA	AA	AA	Ad	AA	AA	AA	AA	AA	Ad	AA	AA	AA	AA	Ad	AA	AA	Ad	AA	AA	AA	AA	Ad	AA	AA	Ad	AA	AA	Ad	Ad
chr1D	123821001	123831000	10000	AA	AA	dd	AA	Ad	AA	AA	AA	AA	AA	AA	AA	AA	AA	AA	AA	AA	AA	Ad	AA	AA	AA	AA	Ad	AA	AA	AA	AB	AA	AA	AA	AA	AA	AA	AA	dd	AA	AA	Ad	Ad	AA	Ad	AA	Ad	Ad	AA
chr1D	124017001	124021000	4000	AA	AA	dd	AA	AA	Ad	AA	AA	AA	AB	Ad	AA	AA	AA	AA	Ad	AA	AA	AA	AA	AA	AA	AA	Ad	AA	AA	AA	AA	AA	AA	AA	AA	AA	AA	Ad	AA	Ad	AA	Ad	Ad	Ad	Ad	AA	Ad	Ad	AA
chr1D	124060001	124097000	37000	AA	AA	AA	AA	AA	AA	AA	AA	AA	AA	AA	AA	AA	AA	AA	AA	AA	AA	AA	AA	AA	AA	AA	AA	AA	AA	AA	AA	AA	AA	AA	AA	AA	AA	AA	AA	AA	AB	AA	AA	AA	AA	AA	AA	AA	AA
chr1D	124112501	124137000	24500	AA	AA	AA	AA	AA	AA	AA	AA	AA	AA	AA	AA	AB	AB	AA	AA	AA	AB	AA	AA	AA	AB	AB	AA	AA	AA	AA	AA	AA	AA	AA	AA	AA	AA	AA	AA	AA	AA	AA	AA	AA	AA	AA	AA	AA	AA
chr1D	124158501	124166500	8000	AA	AA	dd	AA	AA	AA	AA	AA	AA	AA	AA	AA	AA	AA	AA	AA	AA	AB	AA	AA	AA	AA	AA	AA	AA	AA	AA	AA	AA	AA	AA	AA	AA	AA	AA	AA	AA	AA	AA	AA	AA	AA	AA	AA	AA	AA
chr1D	124245501	124253500	8000	AA	Ad	dd	AA	AA	AA	AA	AA	AA	AA	AA	AA	AA	AA	AA	AA	AA	AA	AA	AA	AA	AA	AA	AA	AA	AA	AA	Ad	AA	AA	AA	AA	AA	AA	AA	Ad	Ad	Ad	Ad	Ad	AA	Ad	Ad	Ad	Ad	Ad
chr1D	124262001	124271000	9000	AA	AA	dd	AA	AA	AA	AA	AA	AA	AA	AA	AA	AA	AA	AA	AA	AA	AA	Ad	AA	AA	AA	AA	Ad	AA	AA	AA	Ad	AA	AA	AA	AA	AA	Ad	AA	Ad	Ad	Ad	Ad	Ad	Ad	Ad	Ad	Ad	Ad	Ad
chr1D	124355001	124364000	9000	AA	AA	dd	AA	AA	AA	AA	AA	AA	AA	AA	AA	AA	AA	AA	AA	AA	AA	AA	AA	AA	AA	AA	AA	AA	AA	AA	AA	AA	AA	AA	AA	AA	AA	AA	AA	AA	AA	AA	AA	AA	AA	AA	AA	AA	AA
chr1D	124391501	124400500	9000	AA	AA	dd	AA	AA	AA	AA	AA	AA	AA	AA	AA	AA	AA	AB	AA	AA	AA	AA	AA	AA	AA	AA	AA	AA	AA	AA	AB	AA	AA	AA	AA	AA	AA	AA	Ad	Ad	AA	Ad	Ad	AA	Ad	Ad	Ad	Ad	Ad
chr1D	124439001	124444500	5500	dd	dd	dd	dd	dd	dd	dd	dd	dd	dd	dd	dd	dd	dd	dd	dd	dd	dd	dd	dd	dd	dd	dd	dd	dd	dd	dd	dd	dd	dd	dd	dd	dd	dd	dd	dd	dd	dd	dd	dd	dd	dd	dd	dd	dd	dd
chr1D	124548501	124556000	7500	AA	AA	dd	AA	AA	AA	AA	AA	AA	AA	Ad	AA	AA	AA	AA	AA	AA	AB	AA	AA	Ad	AB	AA	AA	Ad	AA	AA	AA	AA	AA	AA	AA	AA	AA	AA	Ad	AA	AA	Ad	Ad	AA	AA	Ad	Ad	AA	AA
chr1D	124567001	124571000	4000	AA	AA	dd	AA	AA	AA	AA	AA	Ad	AA	AA	AA	AA	AA	AA	Ad	AA	AA	AA	AA	AA	AA	AA	AA	AA	AA	Ad	AB	Ad	AA	AA	AA	AA	AA	AA	Ad	AA	AA	Ad	Ad	AA	Ad	Ad	Ad	Ad	Ad
chr1D	125330501	125334500	4000	AA	AA	dd	AA	AA	Ad	AA	AA	AA	AA	Ad	AA	AA	AA	AA	AA	AA	AA	AA	AA	Ad	AA	AA	AA	AA	AA	AA	AA	AA	AA	AA	AA	AA	AA	AA	Ad	AA	Ad	Ad	AA	AA	Ad	Ad	Ad	Ad	Ad
chr1D	125556501	125564000	7500	AA	AA	AA	AA	AB	AB	AA	AA	AA	AA	AA	AA	AA	AB	AA	AA	AA	AB	AA	AA	AA	AB	AA	AA	AA	AB	AB	AA	AA	AB	AA	AA	AA	AA	AA	AB	dd	AA	AA	AA	AA	AA	AA	AA	AA	AA
chr1D	125670001	125678500	8500	AA	AA	dd	AA	AA	AA	AA	AA	AA	AA	AA	AA	AA	AA	AA	AA	AA	AA	AA	AA	AA	AA	AA	AA	AA	AA	AA	AA	AA	AA	AA	AA	AA	AA	AA	AA	AA	AA	AA	AA	AA	AA	AA	AA	AA	AA
chr1D	125791501	125797000	5500	AA	AA	dd	AA	AA	AA	AA	AA	AA	AA	AA	AA	AA	AA	AA	AA	AA	AA	AA	AA	AA	AA	AA	AA	AA	AA	AA	AA	AA	AA	AA	AA	AA	AA	AA	AA	AA	AA	AA	AA	AA	AA	AA	AA	AA	AA
chr1D	125880501	125885500	5000	AA	AA	dd	Ad	AA	AA	AA	AA	Ad	Ad	AA	AA	AA	AA	Ad	AA	AA	AA	AA	AA	AA	Ad	AA	AA	AA	AA	Ad	Ad	AA	AA	Ad	AA	AA	Ad	AA	AA	Ad	Ad	Ad	Ad	AA	Ad	AA	Ad	Ad	Ad
chr1D	125920501	125927500	7000	AA	AA	AA	AA	AA	AA	AA	AA	AA	AA	AA	AA	AA	AA	AA	AA	AA	Ad	AA	AA	AA	AA	AA	AA	AA	AA	AA	AA	AA	AA	AA	AA	AA	AA	AB	AA	dd	AA	AA	AA	AA	AA	AA	AA	AA	AA
chr1D	125990001	125996500	6500	AA	AA	dd	AA	AA	AA	AA	AA	AA	AA	AA	AA	AA	AA	AA	AA	AA	AA	AA	AA	AA	AA	AA	AA	AA	AA	AA	AA	AA	AA	AA	AA	AA	AA	AA	Ad	Ad	AA	AA	Ad	AA	Ad	AA	AA	Ad	AA
chr1D	126000501	126010000	9500	AA	AA	dd	Ad	AA	AA	AA	AA	AA	Ad	AA	AA	AA	AA	AA	AA	AA	AA	AA	AA	AA	AA	AA	AA	AA	AA	AA	AA	AA	AA	AA	AA	AA	AA	AA	AA	AA	Ad	Ad	AA	AA	AA	AA	Ad	Ad	AA
chr1D	126189001	126196000	7000	AA	Ad	dd	AA	Ad	Ad	AA	AA	AA	AA	AA	AA	AA	AA	AA	AA	AA	AA	Ad	Ad	AA	AA	AA	AA	Ad	AA	AA	Ad	AA	AA	AA	AA	AA	AA	AA	AA	AA	Ad	Ad	Ad	AA	AA	Ad	Ad	Ad	Ad
chr1D	126639001	126669000	30000	AA	AA	dd	AA	AA	AA	AA	AA	AA	AA	AA	AA	AA	AA	AA	AA	AA	AA	AA	AA	AA	AA	AA	AA	AA	AA	AA	AA	AA	AA	AA	AA	AA	AA	AA	AA	AA	AA	AA	AA	AA	AA	AA	AA	AA	AA
chr1D	127032001	127047500	15500	AA	AA	dd	AA	AA	AA	AA	AA	AA	AA	AA	AA	AA	AA	AA	AA	AA	AA	AA	AA	AA	AA	AA	AA	AA	AA	AA	AA	AA	AA	AA	AA	AA	AA	AA	AA	Ad	AA	AA	AA	AA	AA	AA	AA	AA	Ad
chr1D	127044501	127049000	4500	AA	AA	dd	AA	AA	AA	AA	AA	AA	AA	AA	AA	AA	AA	AA	AA	AA	AA	AA	AA	AA	AA	AA	AA	AA	Ad	AA	AA	AA	AA	AA	AA	AA	AA	AA	AA	Ad	AA	Ad	AA	AA	Ad	Ad	AA	AA	Ad
chr1D	127085001	127097000	12000	AA	AA	dd	AA	AA	AA	AA	AA	AA	AA	AA	AA	AA	AA	AA	AA	AA	AA	AA	AA	AA	AA	AA	AA	AA	AA	AA	AB	AA	AA	AA	AA	AA	AA	AA	Ad	AA	AA	Ad	Ad	AA	Ad	AA	Ad	Ad	AA
chr1D	127135001	127139000	4000	AA	AA	AA	AA	AA	AA	AA	Ad	Ad	AA	AA	AA	AA	AA	AA	AA	AA	AA	AA	AA	AA	Ad	AA	AA	AA	AA	Ad	AB	AA	AA	AA	AA	AA	AA	AA	dd	AA	AB	AA	Ad	AA	Ad	AA	AA	AA	AA
chr1D	127276501	127283000	6500	AA	AA	dd	AA	AA	AA	AA	AA	AB	AA	AA	dd	dd	AA	AA	AA	dd	AA	AA	AA	AA	AA	AA	AA	AA	AA	AA	AA	AA	AA	AA	AA	AA	AA	AB	AA	AA	AA	AA	dd	AA	dd	dd	AA	AA	AA
chr1D	127557001	127567000	10000	AA	AA	Ad	AA	AA	AA	AA	AA	AA	AA	AA	AA	AA	AA	AA	AA	AB	AA	AA	AA	AA	AA	AA	AA	AA	AA	AA	AA	AA	AA	Ad	dd	AA	AA	AA	AA	AA	AA	AA	AA	AA	AA	AA	AA	AA	AA
chr1D	127669501	127674000	4500	AA	AA	dd	AA	AA	AA	AA	AA	AA	Ad	AA	AA	AA	AA	AA	AA	AA	Ad	AA	AA	AA	Ad	AA	AA	AA	AA	Ad	AB	AA	AA	AA	AA	AA	AA	AA	Ad	AA	AA	AA	Ad	AA	Ad	AA	AA	AA	AA
chr1D	127852001	127862000	10000	AA	AA	dd	AA	AA	AA	AA	AA	AA	AA	AA	AA	AA	AA	AA	AA	AA	AA	AA	AA	AA	AA	AA	AA	AA	AA	AA	AA	AA	AA	AA	AA	AA	AA	AA	AA	AA	AB	AA	AA	AA	AA	AA	AA	AA	AA
chr1D	127873001	127877000	4000	AA	AA	dd	AA	AA	AA	AA	AA	AA	AA	AA	AA	AA	AA	Ad	AA	AA	AA	AA	AA	AA	AA	AA	AA	AA	AA	AA	AA	Ad	AA	AA	AB	AA	AA	AA	AA	AA	AB	AA	AA	AA	AA	AB	AA	AA	AB
chr1D	128015001	128105500	90500	AA	AA	AA	AA	AA	AA	AA	AA	AA	AA	AA	AA	AA	AA	AA	AA	AA	AA	AA	AA	AA	AA	AA	AA	AA	AA	AA	AA	AA	AA	AA	AA	AA	AA	AA	AA	dd	AA	AA	AA	AA	AA	AA	AA	AA	AA
chr1D	128109001	128113500	4500	AA	AA	AA	AB	AA	AB	AB	AA	AB	AA	AA	AA	AA	AA	AA	AA	AB	AA	AA	AA	AA	AA	AA	AA	AA	AA	AA	AA	AA	AA	AA	AA	AA	AA	AA	dd	AA	AA	AA	Ad	AA	Ad	AA	AA	AA	AA
chr1D	128409501	128414500	5000	Ad	Ad	dd	Ad	Ad	Ad	dd	Ad	Ad	dd	Ad	dd	Ad	Ad	Ad	dd	dd	dd	Ad	Ad	Ad	dd	Ad	Ad	dd	Ad	Ad	Ad	Ad	Ad	dd	Ad	dd	Ad	Ad	dd	Ad	dd	dd	dd	Ad	dd	dd	dd	Ad	dd
chr1D	128409501	128420500	11000	Ad	Ad	dd	Ad	Ad	Ad	Ad	Ad	Ad	Ad	Ad	Ad	Ad	Ad	Ad	Ad	Ad	Ad	Ad	Ad	Ad	Ad	Ad	Ad	Ad	Ad	Ad	Ad	Ad	Ad	Ad	Ad	Ad	Ad	Ad	Ad	Ad	Ad	Ad	Ad	Ad	Ad	Ad	Ad	Ad	dd
chr1D	128587501	128593500	6000	dd	dd	dd	dd	dd	dd	dd	dd	dd	dd	dd	dd	dd	dd	dd	dd	dd	dd	dd	dd	dd	dd	dd	dd	Ad	dd	dd	Ad	dd	dd	dd	dd	dd	dd	dd	dd	dd	dd	dd	dd	dd	dd	dd	dd	dd	dd
chr1D	128695001	128704500	9500	Ad	Ad	dd	AA	Ad	Ad	Ad	Ad	Ad	Ad	Ad	Ad	AA	Ad	Ad	Ad	Ad	Ad	Ad	Ad	Ad	Ad	Ad	Ad	Ad	Ad	AA	Ad	Ad	Ad	Ad	Ad	Ad	Ad	Ad	dd	dd	Ad	Ad	Ad	Ad	Ad	Ad	Ad	Ad	Ad
chr1D	128862001	128871000	9000	Ad	Ad	dd	Ad	Ad	AA	Ad	Ad	Ad	Ad	Ad	Ad	AA	Ad	Ad	Ad	Ad	AA	AA	AA	Ad	AA	Ad	Ad	Ad	Ad	Ad	Ad	Ad	Ad	Ad	Ad	Ad	Ad	Ad	Ad	dd	Ad	Ad	Ad	Ad	Ad	Ad	Ad	Ad	Ad
chr1D	129024001	129030500	6500	AA	AA	AA	AA	AA	AA	AA	AA	AA	AA	dd	AA	AA	AA	AA	AA	AA	AA	AA	AA	AA	AA	AA	AA	AA	AA	AA	AA	AA	AA	AA	AA	AA	AA	AA	AA	AA	AB	AA	AA	AA	AA	AA	AA	AA	AA
chr1D	129156001	129165500	9500	AA	AA	dd	AA	AA	AA	AA	AA	AA	AA	AA	AA	AA	AA	AA	AA	AA	AA	AA	AA	AA	AA	AA	AA	AA	AA	AA	AA	AA	AA	AA	AA	AA	AA	AA	AA	AA	AA	Ad	Ad	AA	AA	AA	AA	AA	AA
chr1D	129244501	129249500	5000	AA	AA	dd	AA	AA	AA	AA	Ad	AA	AA	AA	AA	AA	AA	AA	AA	AA	AA	AA	AA	AA	AA	AA	AA	AA	AA	AA	Ad	AA	AA	AA	AA	AA	AA	AA	AB	AA	AA	AA	AA	AA	AA	Ad	AA	AA	AA
chr1D	129273001	129288500	15500	AA	AA	dd	AA	AA	AA	AA	AA	AA	AA	AA	AA	AA	AA	AA	AA	AA	AA	AA	AA	AA	AA	AA	AA	AA	AA	AA	AA	AA	AA	AA	AA	AA	AA	AA	Ad	Ad	AA	AA	Ad	AA	Ad	AA	Ad	AA	Ad
chr1D	129301501	129308000	6500	AA	Ad	dd	AA	AA	AA	AA	AA	AA	AA	AA	AA	AA	AA	AA	AA	AA	AA	AA	AA	AA	AA	AA	AA	AA	AA	AA	AA	AA	AA	AA	AA	AA	AA	AA	Ad	Ad	Ad	Ad	AA	AA	Ad	AA	Ad	Ad	AA
chr1D	129934501	129944500	10000	AA	AA	dd	AA	AA	AA	AB	AA	AA	AA	AA	AA	AA	AB	AA	AA	AA	AA	AA	AB	AA	AA	AA	AA	AA	AA	AA	AA	AA	AA	AA	AA	AA	AA	AA	Ad	dd	AA	AA	AA	AA	Ad	AA	Ad	Ad	AA
chr1D	129968001	129998500	30500	AA	AA	dd	AA	AA	AA	AA	AA	AA	AA	AA	AA	AA	AA	AA	AA	AA	AA	AA	AA	AA	AA	AA	AA	AA	AA	AA	AA	AA	AA	AA	AA	AA	AA	AA	AA	AA	AA	AA	AA	AA	AA	AA	AA	AA	AA
chr1D	130205001	130252000	47000	AA	AA	dd	AA	AA	AA	AA	AA	AA	AA	AA	AA	AA	AA	AA	AA	AA	AA	AA	AA	AA	AA	AA	AA	AA	AA	AA	AA	AA	AA	AA	AA	AA	AA	AA	AA	AA	AA	AA	AA	AA	AA	AA	AA	AA	AA
chr1D	130374501	130379500	5000	AA	AA	dd	AA	AA	AA	AA	AA	AA	AA	Ad	AA	AA	Ad	AA	AA	AA	AA	Ad	AA	AA	AA	AA	AA	AA	AA	AA	Ad	Ad	AA	AA	Ad	Ad	AA	AA	AA	Ad	Ad	Ad	Ad	AA	Ad	Ad	Ad	Ad	AA
chr1D	130396501	130401500	5000	AA	AA	AA	AA	AA	AA	AA	AA	AA	AA	AA	AA	AA	AA	AA	AA	AA	AA	AB	AA	AA	AA	AA	AA	AA	AA	AA	AB	AA	AA	AA	AA	AA	AB	AA	dd	AA	AA	AA	Ad	AA	AA	AA	AA	AA	AA
chr1D	130445501	130449500	4000	AA	AA	Ad	AA	AB	AB	AA	AA	AB	AA	AA	AB	AA	AA	AA	AA	AA	AA	AA	AB	AA	AA	AA	AA	AA	AB	AA	AA	AA	AB	AA	AA	AB	AA	AA	Ad	AA	AA	AA	Ad	AA	AA	AA	AA	AA	Ad
chr1D	130491001	130495000	4000	AA	AB	dd	AA	AA	AA	AA	AA	AA	Ad	AA	AA	AA	AA	AA	AA	AA	AA	AA	Ad	AA	AA	AA	Ad	AA	AA	AA	AA	AA	AA	AA	AA	AA	AA	AA	AA	AA	AA	AA	Ad	AA	AA	Ad	AA	AA	Ad
chr1D	130548001	130554000	6000	BB	BB	AA	BB	BB	AB	AB	AB	AB	AB	BB	AB	AB	BB	AB	AB	AB	BB	BB	BB	BB	AB	AB	AB	AB	AB	BB	BB	BB	AB	BB	AB	AB	AB	AB	Ad	AA	AB	AB	Ad	BB	AA	AA	AA	AB	AA
chr1D	130961501	130965500	4000	Ad	Ad	dd	Ad	Ad	Ad	Ad	Ad	Ad	Ad	Ad	Ad	Ad	Ad	Ad	Ad	Ad	Ad	Ad	Ad	Ad	Ad	Ad	Ad	Ad	Ad	Ad	Ad	Ad	Ad	Ad	Ad	Ad	Ad	Ad	Ad	Ad	Ad	Ad	Ad	Ad	Ad	Ad	Ad	Ad	Ad
chr1D	131151501	131157000	5500	Ad	Ad	dd	Ad	Ad	Ad	Ad	Ad	Ad	Ad	Ad	Ad	Ad	Ad	Ad	Ad	Ad	Ad	Ad	Ad	Ad	Ad	Ad	Ad	Ad	Ad	Ad	Ad	Ad	Ad	Ad	Ad	Ad	Ad	Ad	Ad	Ad	Ad	Ad	Ad	Ad	Ad	Ad	Ad	Ad	Ad
chr1D	131191501	131196000	4500	Ad	dd	dd	Ad	Ad	Ad	Ad	Ad	Ad	Ad	Ad	Ad	Ad	Ad	Ad	Ad	Ad	Ad	Ad	Ad	Ad	dd	dd	Ad	Ad	Ad	Ad	Ad	Ad	Ad	Ad	Ad	Ad	Ad	Ad	dd	dd	Ad	Ad	dd	dd	Ad	dd	dd	dd	dd
chr1D	131191501	131226000	34500	Ad	Ad	dd	Ad	Ad	Ad	Ad	Ad	Ad	Ad	Ad	Ad	Ad	Ad	Ad	Ad	Ad	Ad	Ad	Ad	Ad	Ad	Ad	Ad	Ad	Ad	Ad	Ad	Ad	Ad	Ad	Ad	Ad	Ad	Ad	Ad	dd	Ad	Ad	Ad	Ad	Ad	Ad	Ad	Ad	Ad
chr1D	131353501	131363000	9500	AA	AA	AA	AA	AA	AA	AA	AA	AA	AA	AA	AA	AA	AA	AA	AA	AA	AA	AA	AB	AA	AA	AA	AA	AA	AA	AA	AA	AA	AA	AB	AA	AA	AA	AA	AA	dd	AA	AA	AA	AA	AA	AA	AA	AA	AA
chr1D	131461501	131468000	6500	AA	AA	dd	Ad	AA	AA	AA	AA	AA	AA	AA	AA	AA	AA	AA	AA	AA	AA	AA	AA	AA	AA	AA	AA	AA	AA	AA	AA	AA	AA	AA	AA	AA	AA	AA	AA	AA	AA	AA	AA	AA	AA	AA	AA	AA	AA
chr1D	131531501	131541000	9500	AA	AA	dd	AA	AA	AA	AA	AA	AA	AB	AA	AA	AA	AA	AA	AA	AA	AA	AA	AA	AA	AA	AA	AA	AA	AA	AA	AA	AA	AA	AA	AA	AA	AA	AA	AA	AA	AA	AA	AA	AA	AA	AA	AA	AA	AA
chr1D	131586001	131594500	8500	AA	AA	AA	AB	AA	AA	AA	AA	AA	AB	AA	AA	AA	AA	AB	AA	AA	AA	AA	AA	AB	AA	AA	AA	AA	AA	AB	AA	AB	AA	AB	AA	AA	AA	AA	AA	AA	AA	AA	AA	AA	AA	AB	AA	AA	AA
chr1D	131673501	131679000	5500	AA	AA	dd	AA	AA	AA	AA	AA	AA	AA	AA	AA	AA	AA	Ad	AA	AA	Ad	AA	AA	Ad	Ad	AA	Ad	AA	AA	Ad	AA	AB	Ad	AA	AA	AA	AA	AA	Ad	dd	Ad	Ad	Ad	AA	Ad	AA	Ad	Ad	AA
chr1D	131702501	131717500	15000	AA	AA	AA	AA	AA	AA	AA	AA	AA	AA	AA	AA	AA	AA	AA	AA	AA	AA	AA	AA	AA	AA	AA	AA	AA	AA	AA	AA	AA	AA	AA	AA	AA	AA	AA	AA	dd	AB	AA	AA	AA	AA	AA	AA	AA	AA
chr1D	131704001	131934500	230500	AA	AA	AA	AA	AA	AA	AA	AA	AA	AA	AA	AA	AA	AA	AA	AA	AA	AA	AA	AA	AA	AA	AA	AA	AA	AA	AA	AA	AA	AA	AA	AA	AA	AA	AA	AA	AA	AA	AA	AA	AA	AA	AA	AA	AA	AA
chr1D	131933501	131939500	6000	AA	AA	dd	AA	AA	AA	Ad	AA	AA	AA	AA	AA	AA	AA	AA	AA	AA	AA	AA	AA	AA	Ad	AA	Ad	AA	AA	AA	AB	AA	AA	AB	AA	AB	AB	AA	Ad	AA	AA	AA	Ad	AA	Ad	AA	AA	Ad	AA
chr1D	132221001	132228000	7000	AA	AA	dd	AA	AA	AA	AA	AA	Ad	AA	AA	AA	AA	AA	AA	Ad	AA	AA	AA	AA	AA	AA	AA	AA	AA	AA	AA	AA	AA	AA	AA	AA	AA	AA	AA	AA	AA	Ad	Ad	AA	AA	AA	Ad	AA	AA	AA
chr1D	132281501	132291000	9500	AA	AA	dd	AA	AA	AA	AA	AA	AA	AA	Ad	Ad	AA	AA	AA	AA	AA	Ad	Ad	AA	AA	AA	AA	Ad	AA	AA	AA	AA	AA	AA	AA	Ad	AA	AA	AA	Ad	Ad	AA	Ad	Ad	AA	Ad	Ad	Ad	Ad	Ad
chr1D	132308001	132317500	9500	AA	AA	AA	Ad	AA	AA	AA	AA	AA	Ad	AA	AA	AA	AA	AA	AA	AA	AA	AA	AA	AA	AA	AA	AA	AA	AA	AA	AA	AA	AA	AA	AA	Ad	AA	AA	AA	dd	AA	AA	AA	AA	AA	AB	AA	AA	AA
chr1D	132403001	132411000	8000	Ad	Ad	dd	Ad	Ad	Ad	Ad	Ad	AA	Ad	Ad	Ad	Ad	Ad	Ad	Ad	Ad	Ad	Ad	AA	Ad	Ad	Ad	Ad	Ad	Ad	Ad	Ad	Ad	Ad	Ad	Ad	Ad	Ad	Ad	Ad	dd	Ad	Ad	Ad	Ad	Ad	Ad	Ad	Ad	Ad
chr1D	132754001	132759500	5500	AA	AA	dd	AA	AA	AA	AA	AA	AA	AA	AA	AA	AA	AA	Ad	Ad	AA	Ad	AA	AA	AA	AA	AA	AA	AA	AA	AA	AA	AA	AA	AA	Ad	AA	AA	Ad	Ad	Ad	Ad	Ad	Ad	AA	Ad	Ad	Ad	Ad	Ad
chr1D	132830501	132838500	8000	Ad	Ad	dd	Ad	AA	Ad	Ad	Ad	Ad	AA	Ad	Ad	AA	Ad	AA	Ad	Ad	Ad	Ad	AA	Ad	Ad	Ad	Ad	Ad	AA	Ad	Ad	Ad	AA	Ad	AA	Ad	Ad	Ad	Ad	Ad	Ad	Ad	Ad	Ad	Ad	Ad	Ad	Ad	Ad
chr1D	133072001	133082000	10000	AA	AA	dd	AA	AA	AA	AA	AA	AA	AA	AA	AA	AA	AA	AA	AA	AA	AA	AA	AA	AA	AA	AA	Ad	AA	AA	AA	AA	AA	AA	AB	AA	AA	AA	AA	AA	AA	AA	AA	Ad	AA	Ad	Ad	Ad	Ad	AA
chr1D	133191501	133205000	13500	AA	AA	dd	AA	AA	AA	AA	AA	AA	AA	AA	AA	AA	AA	AA	AA	AA	AA	AA	AA	AA	AA	AA	AA	AA	AA	AA	AA	AA	AA	AA	AA	AA	AA	AA	Ad	AA	AA	AA	AA	AA	AA	AA	AA	AA	AA
chr1D	133264001	133269500	5500	AA	AA	dd	AA	AA	AA	AA	AA	AA	AA	AA	AA	AA	AA	AA	AA	AA	AA	AA	AA	AA	AA	AA	AA	AA	AA	AA	AA	AA	AA	AA	AA	AA	AA	AA	AA	dd	Ad	AA	AA	AA	Ad	AA	AA	Ad	Ad
chr1D	133275001	133282000	7000	AA	AA	dd	AA	AA	AA	AA	AA	AA	AA	AA	AA	AA	AA	AA	AA	AA	AA	AA	AA	AA	AA	AA	AA	AA	AA	AA	AA	AA	AA	AA	AA	AA	AA	AA	AA	Ad	AA	AA	AA	AA	AA	AA	AA	AA	AA
chr1D	133372001	133376000	4000	AA	AA	dd	AA	AA	AA	Ad	AA	AA	AA	AA	AA	AA	AA	AA	AA	AA	Ad	AA	AA	AA	AA	AA	AA	Ad	Ad	AA	AA	AA	AA	AA	AA	AA	AA	AA	Ad	Ad	Ad	AA	AA	AA	AA	AA	AA	AA	AA
chr1D	133422001	133430000	8000	Ad	AA	dd	Ad	Ad	Ad	Ad	AA	Ad	AA	Ad	Ad	AA	Ad	Ad	Ad	AA	AA	AA	Ad	AA	Ad	AA	AA	Ad	Ad	Ad	Ad	Ad	Ad	Ad	Ad	Ad	Ad	AA	Ad	Ad	Ad	Ad	Ad	AA	Ad	Ad	Ad	Ad	Ad
chr1D	133541501	133554500	13000	Ad	AA	dd	AA	AA	AA	AA	Ad	AA	AA	AA	AA	Ad	AA	AA	AA	AA	AA	AA	AA	AA	AA	AA	AA	AA	AA	AA	AA	AA	AA	AA	AA	AA	AA	AA	Ad	AA	AA	AA	Ad	AA	Ad	AA	Ad	Ad	AA
chr1D	133641001	133645500	4500	AA	AA	AA	AA	AA	AA	AA	AA	AA	AA	AA	AA	AA	AA	AA	AA	AA	AB	AA	AA	AA	AA	AA	AA	AA	AA	AA	AA	AA	AA	AA	AA	AA	dd	AA	AA	AA	AA	AA	AA	AA	AA	AA	AA	AB	Ad
chr1D	133807001	133829500	22500	Ad	Ad	dd	Ad	Ad	Ad	Ad	Ad	Ad	Ad	Ad	Ad	Ad	Ad	Ad	Ad	Ad	Ad	Ad	Ad	Ad	Ad	Ad	Ad	Ad	Ad	Ad	Ad	Ad	Ad	Ad	Ad	Ad	Ad	Ad	Ad	dd	Ad	Ad	Ad	Ad	Ad	Ad	Ad	Ad	Ad
chr1D	133865001	133872000	7000	AA	AA	AA	AA	AA	AA	AA	AA	AA	AA	AA	AA	AA	AA	AA	AA	AA	AA	AA	AA	AA	AA	AA	AA	AA	AA	AA	AA	AA	AA	AA	AA	AA	AA	AA	AA	AA	AA	AA	AA	AA	AA	AA	AA	AA	AA
chr1D	133970501	133985000	14500	AA	AA	AA	AA	dd	AA	AA	AA	AA	AA	AA	AA	AA	AA	AA	AA	AA	AA	AA	AA	AA	AA	AA	AA	AA	AA	AA	AA	AA	AA	AA	AA	AA	AB	AA	AB	AA	AA	AA	AA	AA	AA	AA	AA	AA	AA
chr1D	134343001	134350000	7000	AA	AA	dd	AA	AA	AA	AA	AA	AA	AA	AA	AA	AA	AA	AA	AA	AA	AA	AA	AA	AA	AA	AA	AA	AA	AA	AA	AA	AA	AA	AA	AA	AA	AA	AA	AB	AA	AA	AA	AA	AA	AA	AA	AA	AA	AA
chr1D	134364001	134376000	12000	AA	AA	dd	AA	AA	AA	Ad	AA	AA	AA	AA	AA	Ad	AA	AA	AA	AA	AA	AA	AA	AA	AA	AA	AA	AA	AA	AA	AA	AA	AA	AA	AA	AA	AA	AA	Ad	Ad	AA	Ad	Ad	AA	Ad	Ad	Ad	Ad	Ad
chr1D	134691501	134709000	17500	Ad	AA	dd	Ad	Ad	Ad	Ad	Ad	Ad	AA	Ad	Ad	Ad	AA	Ad	Ad	Ad	Ad	Ad	Ad	AA	Ad	Ad	AA	Ad	AA	Ad	Ad	Ad	AA	Ad	Ad	Ad	Ad	AA	Ad	dd	Ad	Ad	Ad	Ad	Ad	Ad	Ad	Ad	Ad
chr1D	134797001	134804000	7000	Ad	AA	dd	AA	AA	AA	AA	AA	Ad	AA	AA	Ad	AA	AA	AA	AA	Ad	AA	AA	Ad	AA	Ad	AA	AA	AA	AA	Ad	AA	AA	AA	AA	AA	AA	AA	AA	Ad	AB	Ad	Ad	Ad	AA	Ad	Ad	Ad	Ad	Ad
chr1D	134951501	134957000	5500	Ad	AA	dd	AA	Ad	AA	Ad	AA	AA	Ad	AA	Ad	Ad	AA	AA	AB	Ad	AA	Ad	Ad	Ad	Ad	Ad	Ad	AB	Ad	Ad	AA	Ad	Ad	Ad	AA	AA	Ad	AA	AB	dd	Ad	AA	Ad	AA	AA	AA	Ad	AA	AA
chr1D	134984001	134991000	7000	AA	AA	dd	AA	Ad	AA	Ad	AA	AA	AA	AA	AA	AA	AA	AA	AA	AA	AA	AA	AA	AA	AA	AA	AA	AA	AA	AA	AA	AA	AA	AA	AA	AA	AA	AA	AA	AA	Ad	Ad	Ad	AA	Ad	AA	Ad	AA	AA
chr1D	135235001	135242500	7500	AA	AA	dd	AA	AA	AA	AA	AA	AA	AA	AA	AA	AA	AA	AA	AA	AA	AA	AA	AB	AA	AA	AA	AA	AA	AA	AA	AA	AA	AA	AA	AA	AA	AA	AA	AA	AA	Ad	AA	AA	AA	AA	AA	AA	AA	AA
chr1D	135375501	135383500	8000	AA	AA	dd	AA	AA	AA	AA	AA	AA	AA	AA	AA	AA	AA	AA	AA	AA	AB	AA	AA	AA	AA	AA	AA	AA	AA	AA	AA	AA	AB	AA	AA	AA	AA	AA	AA	AA	AA	AA	AA	AA	AA	Ad	AA	AA	Ad
chr1D	135446501	135452000	5500	AA	AA	dd	AA	AA	AA	AA	AA	AA	AA	AA	AA	AA	AA	AA	AA	AA	AA	Ad	AA	AA	AA	AA	AA	AA	AA	AA	AA	AA	AA	AA	AA	AA	AA	AA	AA	Ad	Ad	Ad	AA	AA	AA	Ad	Ad	AA	Ad
chr1D	135916501	135921500	5000	Ad	AA	dd	AA	AA	AA	Ad	AA	AA	AA	AA	AA	Ad	AA	AA	AA	AA	AA	Ad	AA	AA	AA	AA	AA	AA	AA	AA	AA	AA	AA	AA	AA	AA	Ad	Ad	Ad	dd	Ad	Ad	Ad	AA	Ad	AA	Ad	Ad	Ad
chr1D	135955501	135962500	7000	AA	AA	AA	AA	AA	AA	AA	AA	AA	AA	dd	AA	AA	AA	AA	AA	AA	AA	AA	AA	AA	AA	AA	AA	AA	AA	AA	AA	AA	AA	AA	AA	AA	AA	AA	AA	AA	AA	AA	AA	AA	AA	AA	AA	AA	AA
chr1D	135987501	135998500	11000	AA	AA	dd	AA	AA	AA	AA	AA	AA	AA	AA	AA	AA	AA	AA	AA	AA	AA	AA	AA	AA	AA	AA	AA	AA	AA	AA	AA	AA	AA	AA	AA	AA	AA	AA	AA	Ad	Ad	Ad	Ad	AA	Ad	AA	Ad	Ad	AA
chr1D	136074001	136079500	5500	AA	AB	dd	AB	AA	AA	AB	AA	AB	AB	AA	AA	AA	AB	AA	AA	AA	AA	AB	AB	AA	AA	AA	AA	AA	AA	AA	AA	AA	AB	AA	AA	AA	AA	AA	AA	AA	AB	AA	AA	AA	AA	AA	AA	AA	Ad
chr1D	136131001	136142000	11000	AA	AA	dd	AA	AA	AA	AA	AA	Ad	AA	AA	AA	AA	AA	AA	AA	AA	Ad	AA	AA	AA	AA	AA	AA	AA	AA	AA	AA	AA	AA	Ad	AA	AA	AA	AA	Ad	Ad	AA	Ad	Ad	AA	Ad	AA	AA	AA	AA
chr1D	136187501	136191500	4000	AA	Ad	dd	Ad	AA	AA	AA	Ad	Ad	Ad	AA	AA	Ad	AA	AA	AA	AA	Ad	AA	Ad	AA	Ad	Ad	AA	Ad	Ad	AA	AA	Ad	AA	Ad	AA	AA	Ad	AA	Ad	Ad	Ad	Ad	Ad	AA	Ad	Ad	Ad	Ad	AA
chr1D	136224001	136234500	10500	AA	AA	dd	AA	AA	AA	AA	AA	AA	AA	AA	AA	AA	AA	AA	AA	AA	AA	Ad	AA	AA	AA	AA	AA	AA	AA	AA	AA	AA	AA	AA	AA	Ad	AA	AA	AA	Ad	Ad	Ad	Ad	AA	AA	AA	Ad	Ad	AA
chr1D	136472501	136478000	5500	Ad	Ad	dd	Ad	Ad	Ad	AA	AA	AA	AA	Ad	Ad	AA	AA	AA	AA	Ad	Ad	AA	Ad	AA	AA	AA	Ad	Ad	Ad	AA	AB	AA	Ad	AA	Ad	Ad	Ad	AA	dd	AA	AA	AA	Ad	AA	AA	AA	AA	Ad	AA
chr1D	136623501	136633000	9500	AA	AA	dd	AA	AA	AA	AA	AA	AA	AA	AA	AA	AA	AA	AA	AA	AA	AA	Ad	AA	AA	AA	AA	AA	AA	AA	AA	AA	AA	AA	AA	AA	AA	AA	Ad	Ad	AA	Ad	Ad	Ad	AA	Ad	Ad	Ad	Ad	Ad
chr1D	136710501	136715500	5000	AA	AA	dd	AA	AA	AA	AA	AA	AA	AA	AA	AA	AA	AA	AA	AA	AA	AA	AA	AA	AA	AA	AA	AA	AA	AA	AA	AA	AA	AA	AA	AA	AA	AA	AA	AA	AA	Ad	Ad	AA	AA	AA	Ad	Ad	Ad	Ad
chr1D	136773501	136780000	6500	AA	AA	dd	AA	Ad	AA	AA	Ad	AA	AA	AA	AA	AA	AA	AA	AA	AA	AA	AA	AA	AA	Ad	AA	AA	AA	AA	AA	AA	AA	AA	AA	AA	AA	Ad	AB	AA	AA	AA	AA	Ad	AA	AA	AA	AA	Ad	AA
chr1D	136823001	136829500	6500	AA	AA	AA	AA	AB	AA	AA	AA	AA	AA	AA	AB	AA	AA	AA	AA	AA	AA	AA	AB	AA	AA	AA	AA	AA	AA	AA	AB	AA	AA	AA	AA	AB	AA	AA	Ad	dd	AA	AA	Ad	AA	AA	AA	AA	AA	AA
chr1D	136834001	136841000	7000	AB	AA	dd	AB	AA	AA	AA	AA	AA	AB	AB	AA	AA	AA	AB	AA	AA	AA	AB	AA	AA	AA	AB	AA	AA	AA	AA	AB	AA	AA	AA	AA	AA	AA	AA	AA	AA	AA	AA	AA	AA	AA	AA	AA	AA	AA
chr1D	136876501	136884000	7500	AA	AA	dd	AA	AA	AA	AA	AA	AA	AA	AA	AA	AA	AA	AA	AA	AA	AA	AA	AA	AA	AA	AA	AA	AA	AA	AA	AA	AA	AA	AA	AA	AA	AA	AA	AA	AA	AA	AA	AA	AA	AA	AA	AA	AA	AA
chr1D	136886501	136891500	5000	AA	AA	dd	AA	AA	AA	AB	AA	AA	AA	AA	AA	AA	AA	AA	AA	AA	AA	AA	AA	AB	AB	AA	AA	AA	AA	AA	AA	AA	AA	AA	AA	AA	AA	AA	AA	AA	AA	AA	AA	AA	AA	AA	AA	AA	AA
chr1D	137356001	137376500	20500	AA	AA	dd	AA	AA	AA	AA	AA	AA	AA	AA	AA	AA	AA	AA	AA	AA	AA	AA	AA	AA	AA	AA	AA	AA	AA	AA	AA	AA	AA	AA	AA	AA	AA	AA	Ad	AA	AA	Ad	Ad	AA	Ad	Ad	Ad	Ad	Ad
chr1D	137389001	137393000	4000	AA	Ad	AA	AA	AA	AA	AA	Ad	AA	AA	Ad	AA	AA	AA	AA	AA	AA	AA	Ad	AA	AA	AA	AA	Ad	AA	Ad	AA	AB	AA	AA	AA	AA	AA	AA	AA	dd	AA	AB	AA	Ad	AA	AA	AA	AA	AA	AA
chr1D	137421501	137427500	6000	Ad	Ad	dd	Ad	Ad	Ad	Ad	AA	Ad	Ad	AA	Ad	Ad	Ad	Ad	Ad	AA	AA	Ad	Ad	Ad	Ad	AA	Ad	Ad	Ad	Ad	Ad	Ad	Ad	Ad	Ad	Ad	Ad	Ad	Ad	Ad	Ad	Ad	Ad	Ad	Ad	AA	Ad	Ad	Ad
chr1D	137638001	137642500	4500	Ad	AA	dd	AA	AA	AA	AA	AA	AA	Ad	AA	AA	AA	AA	AA	AA	AA	AA	AA	Ad	AA	AA	AA	AA	Ad	AA	AA	AA	AA	AA	Ad	AA	AA	AA	AA	Ad	AA	Ad	AA	Ad	AA	Ad	AA	Ad	AA	AA
chr1D	137678001	137699500	21500	AA	AA	dd	AA	AA	AA	AA	AA	AA	AA	AA	AA	AA	AA	AA	AA	AA	AA	AA	AA	AA	AA	AA	AA	AA	AA	AA	AA	AA	AA	AA	AA	AA	AA	AA	AB	AA	AA	AA	AA	AA	AA	AA	AA	AA	AA
chr1D	137815001	137822500	7500	AA	AA	dd	AA	AA	AA	AA	AA	AB	AA	AA	AA	AA	AA	AA	AA	AA	AA	AA	AA	AA	AA	AA	AA	AA	AA	AA	AA	AA	AA	AA	AA	AA	AA	AA	AA	AA	AA	AA	AA	AA	AA	AA	AA	AA	AA
chr1D	138060001	138067500	7500	Ad	AA	dd	Ad	AA	AA	Ad	AA	Ad	AA	Ad	Ad	Ad	Ad	AA	Ad	Ad	Ad	Ad	AA	Ad	AA	AA	Ad	Ad	AA	AA	Ad	AA	Ad	Ad	Ad	AA	AA	AA	Ad	dd	Ad	Ad	Ad	Ad	Ad	Ad	Ad	AA	Ad
chr1D	138096501	138106000	9500	AA	AA	dd	AA	AA	AA	AA	AA	AA	AA	Ad	AA	AA	AA	AA	AA	Ad	AA	Ad	AA	AA	AA	Ad	Ad	Ad	Ad	AA	AA	Ad	Ad	Ad	AA	AA	AA	AA	Ad	Ad	Ad	Ad	Ad	Ad	Ad	Ad	Ad	Ad	Ad
chr1D	138502001	138512500	10500	AA	AA	dd	Ad	Ad	AA	AA	AA	AA	Ad	AA	AA	AA	AA	AA	AA	Ad	Ad	AA	AA	AA	Ad	AA	AA	AA	AA	Ad	AA	Ad	Ad	AA	Ad	Ad	Ad	AA	Ad	AA	Ad	Ad	Ad	AA	Ad	AA	Ad	Ad	Ad
chr1D	138666001	138685500	19500	AA	AA	dd	AA	AA	AA	AA	AA	AA	AA	AA	AA	AA	AA	AA	AA	AA	AA	AA	AA	AA	AA	AA	AA	AA	AA	AA	AA	AA	AA	AA	AA	AA	AA	AA	AA	AA	AA	AA	AA	AA	AA	Ad	AA	AA	AA
chr1D	138796501	138856000	59500	AA	AA	dd	AA	AA	AA	AA	AA	AA	AA	AA	AA	AA	AA	Ad	AA	AA	AA	Ad	AA	AA	AA	AA	AA	AA	AA	AA	AA	AA	AA	AA	AA	AA	AA	AA	Ad	Ad	Ad	Ad	Ad	AA	Ad	Ad	Ad	Ad	Ad
chr1D	138883001	138892500	9500	AA	AA	AA	AA	AA	AA	AA	AA	AB	AB	AA	AA	AA	AA	AA	AA	AA	AA	AA	AA	AA	AA	AA	AA	AA	AA	AA	AB	AA	AA	AB	AA	AA	AB	AA	Ad	AA	dd	AA	Ad	AA	AA	AA	AA	AA	AA
chr1D	138910001	138915500	5500	AA	AA	dd	AA	AA	AA	AA	AA	AA	AA	AA	AA	AA	AA	AA	AA	AA	AA	AA	AA	AA	AA	AA	AA	AA	AA	AA	AA	AA	AA	AA	AA	AA	AA	AA	Ad	AA	Ad	AA	AA	AA	AA	Ad	AA	AA	AA
chr1D	138955001	138961500	6500	AA	Ad	dd	Ad	Ad	AA	Ad	Ad	Ad	Ad	Ad	AA	Ad	AA	Ad	Ad	AA	Ad	Ad	AA	AA	Ad	Ad	Ad	Ad	AA	Ad	Ad	Ad	Ad	AA	AA	AA	AA	AA	dd	AA	Ad	Ad	Ad	AA	Ad	Ad	Ad	Ad	Ad
chr1D	138988001	138997000	9000	AA	AA	dd	AA	AA	AA	Ad	AA	AA	AA	AA	AA	AA	Ad	AA	AA	AA	AA	AA	Ad	Ad	AA	AA	AA	AA	AA	AA	AA	AA	AA	AA	AA	AA	AA	AA	Ad	AA	AA	AA	Ad	AA	Ad	AA	Ad	Ad	AA
chr1D	139170501	139178500	8000	AA	AA	dd	AA	AA	AA	AA	AA	AA	AA	AA	AA	AA	AA	AA	Ad	AA	AA	AA	AA	AA	AA	AA	AA	AA	AA	AA	AA	AA	AA	AA	AA	AA	AA	AA	Ad	AA	AA	AA	AA	AA	AA	AA	AA	AA	AA
chr1D	139208501	139221500	13000	Ad	Ad	dd	Ad	Ad	Ad	Ad	AA	Ad	AA	Ad	AA	Ad	AA	Ad	Ad	Ad	Ad	Ad	Ad	Ad	AA	Ad	Ad	Ad	Ad	Ad	Ad	Ad	Ad	AA	AA	Ad	Ad	AA	dd	dd	Ad	Ad	Ad	Ad	Ad	Ad	Ad	Ad	Ad
chr1D	139234001	139251500	17500	AA	AA	dd	AA	AA	AA	AA	AA	AA	AA	AA	AA	AA	AA	AA	AA	AA	AA	AA	AA	AA	AA	AA	AA	AA	AA	AA	AA	AA	AA	AA	AA	AA	AA	AA	AA	AA	AA	AA	AA	AA	AA	AA	AA	AA	AA
chr1D	139293501	139298000	4500	AA	AA	AA	AA	AA	AA	AA	AA	AA	AA	AA	AA	AA	AA	AA	AA	AA	AA	AA	AA	AA	AA	AA	AA	AA	AA	AA	AA	AA	AA	AA	AA	AA	AA	AA	AA	dd	AA	AA	Ad	AA	AA	AA	AA	AA	AA
chr1D	140245001	140250000	5000	AA	AA	dd	AB	AA	AB	AA	AA	AA	AA	AA	AA	AA	AB	AA	AA	AA	AA	AA	AA	AA	AA	AA	AA	AA	AA	AA	AB	AA	AA	AA	AA	AA	AA	AA	Ad	Ad	AA	AA	Ad	AA	Ad	AA	AA	AA	AA
chr1D	140283501	140308500	25000	Ad	Ad	Ad	AA	AA	AA	AA	AA	AA	AA	AA	AA	AA	AA	AA	Ad	Ad	AA	AA	AA	AA	AA	AA	AA	Ad	Ad	AA	AA	AA	AA	AA	AA	AA	AA	AA	Ad	dd	AA	AA	AA	AA	AA	AA	AA	Ad	AA
chr1D	140533001	140537000	4000	AA	AA	dd	AB	AA	AA	AA	AA	AA	AA	AA	Ad	AA	AA	AA	AA	AA	AA	AA	AA	AA	AA	AA	AA	AA	AA	AA	AA	Ad	AA	AA	AB	AA	AA	AA	Ad	Ad	Ad	Ad	Ad	Ad	Ad	Ad	Ad	Ad	Ad
chr1D	140639501	140647500	8000	AA	AA	dd	AA	AA	Ad	AA	AA	AA	AA	AA	AA	AA	AA	AA	AA	AA	AA	AA	AA	AA	AA	AA	AA	AA	AA	AA	AA	AA	AA	AA	AA	AA	AA	AA	AA	Ad	Ad	Ad	Ad	AA	Ad	Ad	Ad	Ad	Ad
chr1D	140765501	140773500	8000	Ad	Ad	dd	AA	AA	Ad	Ad	Ad	Ad	AA	Ad	AA	AA	AA	Ad	AA	AA	AA	Ad	AA	AA	Ad	AA	AA	AA	AA	Ad	AA	AA	AA	AA	Ad	AA	AA	Ad	Ad	Ad	Ad	Ad	Ad	AA	Ad	Ad	Ad	Ad	Ad
chr1D	141039001	141052500	13500	AA	AA	dd	AA	AA	AA	AA	AA	AA	AA	AA	AA	AA	AA	AA	AA	AA	AA	AA	AA	AA	AA	AA	AA	AA	AA	AA	AA	AA	AA	AA	AA	AA	AA	AA	AA	AA	AA	AA	AA	AA	AA	AA	AA	AA	AA
chr1D	141243501	141251500	8000	AA	AA	dd	AA	AA	AA	AA	AA	AA	AA	AA	AA	AA	AA	AA	AA	AA	AA	AA	AA	AA	AA	AA	AA	AA	AA	AA	AA	AA	AA	AA	AA	AA	AA	AA	Ad	Ad	Ad	Ad	Ad	AA	Ad	Ad	Ad	Ad	Ad
chr1D	141293501	141306000	12500	Ad	AA	dd	AA	AA	AA	AA	AA	AA	AA	AA	Ad	Ad	AA	AA	Ad	Ad	AA	Ad	AA	Ad	AA	AA	Ad	Ad	AA	AA	AA	AA	AA	AA	AA	AA	AA	Ad	Ad	Ad	Ad	Ad	Ad	Ad	Ad	Ad	Ad	Ad	Ad
chr1D	141312001	141316500	4500	AA	Ad	dd	AA	AA	AA	Ad	AA	AA	Ad	AA	Ad	AA	AA	AB	AA	AA	AA	AA	AA	AA	AA	AA	AA	AA	AB	AA	Ad	AA	AA	AA	AA	Ad	AA	AA	Ad	AA	Ad	Ad	Ad	Ad	Ad	Ad	Ad	Ad	dd
chr1D	141347501	141352000	4500	AA	AA	dd	AA	AA	AB	AA	AB	AA	AB	AA	AA	AA	AA	AA	AA	AA	AB	AA	AA	AA	AB	AB	AA	AA	AA	AA	AA	AA	AB	AB	AA	AA	AA	AA	Ad	Ad	Ad	Ad	Ad	AA	Ad	AA	Ad	Ad	AA
chr1D	141504501	141516500	12000	AB	AA	dd	AB	AA	AA	AA	AA	AA	AA	AA	AA	AA	AA	AB	AA	AA	AA	AA	AA	AA	AB	AA	AA	AA	AB	AA	AA	AA	AA	AB	AA	AA	AA	AA	Ad	dd	AA	AA	AA	AA	AA	AA	AA	AA	AA
chr1D	141600501	141612000	11500	Ad	AA	dd	AA	Ad	AA	AA	AA	AA	Ad	Ad	AA	AA	Ad	AA	AA	Ad	AA	AA	Ad	AA	Ad	AA	Ad	AA	AA	Ad	AA	AA	AA	Ad	AA	Ad	AA	AA	Ad	AA	Ad	Ad	Ad	AA	Ad	Ad	Ad	Ad	Ad
chr1D	141618001	141656000	38000	AA	AA	dd	AA	AA	AA	AA	AA	AA	AA	AA	AA	AA	AA	AA	AA	AA	AA	AA	AA	AA	AA	AA	AA	AA	AA	AA	AA	AA	AA	AA	AA	AA	AA	AA	AA	AA	AA	AA	AA	AA	AA	AA	AA	AA	AA
chr1D	141784001	141789000	5000	AA	AA	AA	AA	AA	AA	AA	AB	AB	AA	AA	AA	AA	AA	AA	dd	AA	AA	AA	AA	AB	AA	AA	AA	AA	AA	AA	AB	AA	AA	AB	AA	AA	AB	AA	AA	AA	AA	AA	AA	AA	AA	AB	AA	AA	AA
chr1D	142362501	142367000	4500	Ad	AA	AA	AA	AA	AA	AA	AA	AA	AA	dd	AA	AA	AA	AA	AA	AA	AA	AA	AA	AA	AA	AA	AA	AA	AA	AA	AA	AA	AA	AA	AA	AA	AA	AA	AB	AA	AA	AB	AA	AA	AA	AA	AA	AA	AA
chr1D	142399001	142403000	4000	AA	AA	dd	AA	AA	AA	AA	AA	Ad	AA	AB	AA	AA	AA	AA	AA	AA	AA	AA	AA	AA	AA	AA	AA	AA	AA	Ad	AA	AA	AA	AA	AA	AA	AA	AA	Ad	AA	AA	Ad	Ad	AA	Ad	AA	AA	AA	AA
chr1D	142457501	142465500	8000	AA	AA	dd	AA	AA	AA	AA	AA	Ad	AA	AA	AA	AA	AA	AA	AA	AA	AA	AA	AA	AA	AA	AA	AA	AA	AA	AA	AA	AA	AA	AA	AA	AA	AA	AA	Ad	AA	Ad	Ad	AA	AA	Ad	AA	Ad	AA	AA
chr1D	142586501	142590500	4000	dd	dd	dd	dd	dd	dd	dd	dd	dd	dd	dd	dd	dd	dd	dd	dd	dd	dd	dd	dd	dd	dd	dd	dd	dd	dd	dd	dd	dd	dd	dd	dd	dd	dd	dd	dd	dd	dd	dd	dd	dd	dd	dd	dd	dd	dd
chr1D	142696001	142705500	9500	AA	AA	dd	AA	AA	AA	AA	AA	AA	AA	AA	AA	AA	Ad	AA	AA	Ad	AA	AA	AA	AA	AA	AA	AA	AA	AA	AA	AA	AA	AA	AA	AA	AA	AA	AA	AA	AA	Ad	AA	AA	AA	AA	AA	Ad	Ad	AA
chr1D	142860501	142870000	9500	Ad	AA	dd	AA	AA	Ad	AA	AA	AA	AA	AA	AA	Ad	AA	Ad	AA	Ad	Ad	Ad	Ad	AA	AA	Ad	Ad	Ad	Ad	AA	AA	AA	AA	AA	Ad	Ad	AA	AA	Ad	AA	Ad	Ad	Ad	AA	Ad	Ad	Ad	Ad	Ad
chr1D	143048501	143058000	9500	AA	AA	dd	AA	Ad	AA	AA	AA	AA	AA	Ad	AA	AA	AA	AA	AA	AA	AA	AA	AA	AA	AA	AA	AA	AA	AA	AA	AA	AA	AA	AA	AA	AA	Ad	AA	AA	dd	AA	AA	AA	AA	AA	AA	Ad	AA	AA
chr1D	143192001	143198000	6000	AB	AA	AA	AA	AA	AA	AA	AA	AA	AB	AA	AA	AA	AA	AA	AA	AA	AA	AA	AA	AA	AA	AA	AA	AA	AA	AA	AA	AA	AA	AA	AA	AA	AA	AA	AA	dd	AA	AA	AA	AA	AA	AA	AA	AA	AB
chr1D	143236001	143246000	10000	Ad	Ad	dd	Ad	Ad	Ad	Ad	Ad	Ad	Ad	AA	Ad	Ad	Ad	Ad	AA	Ad	Ad	Ad	Ad	Ad	Ad	Ad	Ad	Ad	AA	Ad	Ad	Ad	Ad	Ad	Ad	Ad	Ad	AA	AA	Ad	Ad	Ad	Ad	AA	Ad	Ad	Ad	Ad	Ad
chr1D	143267501	143273000	5500	AA	Ad	dd	Ad	Ad	AA	Ad	AA	Ad	Ad	AA	AA	AA	Ad	Ad	AA	AA	AA	AA	Ad	Ad	AA	AA	Ad	AA	Ad	Ad	Ad	Ad	Ad	AA	Ad	Ad	Ad	AA	Ad	Ad	Ad	Ad	Ad	Ad	Ad	Ad	Ad	Ad	Ad
chr1D	143504001	143516500	12500	AA	dd	AA	AA	AA	AA	AA	AA	AA	AA	AA	AA	AA	AA	dd	AA	AA	AA	AA	AA	AA	AA	AA	AA	AA	AA	AA	AA	AA	AA	AA	AA	AA	AA	AA	AA	AA	AA	dd	AA	AA	AA	AA	AA	AA	AA
chr1D	143749001	143761000	12000	AA	AA	dd	AA	AA	AA	AA	AA	AA	AA	AA	AA	AA	AA	AA	AA	AA	AA	AA	AA	AA	AA	AA	AA	AA	AA	AA	AA	AA	AA	AA	AA	AA	AA	AA	AA	AA	AB	AA	AA	AA	AA	AA	AA	AA	AA
chr1D	143805501	143810500	5000	AA	AA	AB	dd	AB	AA	AA	AA	AA	AB	AA	AB	AB	AA	AA	AA	AA	AA	AA	AA	AB	AA	AA	AA	AA	AA	AA	AB	AA	AA	AB	AA	AB	AB	AB	AA	AA	AA	AA	AA	AA	AA	AB	AA	dd	dd
chr1D	143912001	143919000	7000	Ad	dd	dd	Ad	Ad	Ad	dd	Ad	Ad	Ad	dd	dd	Ad	Ad	Ad	Ad	Ad	Ad	Ad	Ad	Ad	dd	Ad	dd	Ad	dd	dd	dd	dd	Ad	Ad	dd	Ad	dd	Ad	dd	dd	dd	dd	dd	Ad	dd	dd	dd	dd	dd
chr1D	144266501	144271000	4500	AA	AA	AA	AA	Ad	dd	AA	AA	AA	AA	AA	AA	AA	AA	AA	AA	AA	AA	AA	AA	AA	Ad	AA	AA	Ad	AA	AA	AB	AA	AA	AA	AA	AA	AA	AA	Ad	AA	AB	AA	Ad	AA	AA	AA	AA	AA	AA
chr1D	144304001	144309000	5000	AA	AA	Ad	AA	AA	dd	AA	AA	AA	AA	AA	AA	AA	AA	AA	AA	AA	AA	AA	AA	AA	AA	AA	AA	AA	AA	AA	AA	AA	AA	AA	AA	AA	AA	AA	AB	AA	AA	AA	AA	AA	AA	AA	AA	AA	AA
chr1D	144307501	144312000	4500	AA	AA	dd	AA	AA	Ad	AA	AA	AA	AA	AA	AA	AA	AA	AA	AA	AA	AA	AA	AA	AA	AA	AA	AA	AA	AA	AA	AA	AA	AA	AA	AA	AA	AA	AA	AB	AA	AB	AA	AB	AA	AA	AA	AA	AA	AA
chr1D	144316001	144329500	13500	AA	AA	AA	AA	AA	dd	AA	AA	AA	AA	AA	AA	AA	AA	AA	AA	AA	AA	AA	AA	AA	AA	AA	AA	AA	AA	AA	AA	AA	AA	AA	AA	AA	AA	AA	AB	AA	AA	AA	AA	AA	AA	AA	AA	AA	AA
chr1D	144329001	144333000	4000	AB	AA	AA	AA	AA	Ad	AA	AA	AA	AA	AA	AA	AA	AB	AA	AB	AA	AA	AB	AA	AA	AA	AA	AB	AA	AA	AA	AA	AB	AA	AA	AA	AA	AB	AA	AA	dd	AA	AA	AA	AA	AA	AA	AA	AA	AA
chr1D	144384001	144389500	5500	AA	AA	dd	AA	AA	dd	AA	AA	AA	AA	AA	AA	AA	AA	AA	AA	AA	AA	AB	AA	AA	AB	AA	AA	AA	AA	AA	AA	AA	AA	AA	AB	AA	AA	AA	Ad	M	Ad	Ad	AA	AA	Ad	AA	AA	Ad	AA
chr1D	144455001	144464000	9000	AA	Ad	AA	AA	AA	dd	AA	AA	AA	Ad	AA	AA	AA	AA	AA	AA	AA	AA	AA	AA	AA	AA	AA	AA	AA	AA	AA	AA	Ad	AA	AA	AA	AA	AA	AA	AA	AA	AA	AA	AA	AA	AA	AA	AA	AA	AA
chr1D	144467001	144471500	4500	AA	AA	AA	AA	AA	dd	AA	AA	AA	AA	Ad	AA	AA	AA	AA	AA	AA	AA	AA	AA	AA	AA	AA	AA	AA	AA	AA	AB	Ad	AA	AA	AA	AA	AA	AA	dd	AA	AB	AA	Ad	AA	Ad	AA	AA	AA	AA
chr1D	144667001	144675500	8500	AB	AA	dd	AA	AA	AA	AA	AA	AA	AA	AA	AA	AA	AA	AA	AA	Ad	AA	Ad	AA	AA	AB	AA	Ad	AA	AA	AA	Ad	AA	AA	AA	AA	AA	AA	AA	Ad	Ad	Ad	Ad	Ad	Ad	Ad	AA	Ad	Ad	Ad
chr1D	145056501	145075000	18500	AA	AA	dd	AA	AA	AA	AA	AA	AA	AA	AA	AA	AA	AA	AA	AA	AA	AA	AA	AA	AA	AA	AA	AA	AA	AA	AA	AA	AA	AA	AA	AA	AA	AA	AA	AB	AA	AA	AA	AA	AA	AA	AA	AA	AA	AA
chr1D	145158001	145165500	7500	AA	AA	AA	AA	AA	AA	AA	AA	AA	AA	AA	AA	AA	AA	AA	AA	AA	AA	AA	AA	AA	AA	AA	AB	AA	AA	AA	AA	AA	AA	AA	AA	AA	AA	AA	AA	dd	AB	AA	AA	AA	AA	AA	AA	AA	AB
chr1D	145251501	145255500	4000	AA	Ad	Ad	Ad	AA	AA	AA	AA	AA	AA	AA	AA	AA	AA	AA	AA	AB	AA	AB	AA	AA	AA	AA	AA	AA	AA	AA	AA	AA	AA	AA	AA	AA	AA	AA	AA	dd	AA	AA	AA	AA	AA	AA	AA	AA	AA
chr1D	145264001	145268000	4000	AA	AA	AA	AA	AA	AA	AA	AA	AA	AA	AA	AA	AA	AA	AA	AA	AA	AA	AA	AA	AA	AA	AA	AA	AA	AA	AA	AB	AA	AB	AA	AA	AA	AB	AA	Ad	dd	AA	AA	Ad	AA	AA	AA	AA	AA	AA
chr1D	145289001	145293000	4000	AA	AA	dd	AA	AA	AA	AA	AA	AA	AA	Ad	AA	AA	Ad	AA	AA	Ad	Ad	Ad	AA	AA	Ad	AA	AA	AA	AA	AA	AA	AA	AA	AA	AA	AA	Ad	AA	Ad	Ad	Ad	Ad	Ad	AA	AA	Ad	AA	Ad	Ad
chr1D	145455001	145460500	5500	dd	AB	dd	AA	AA	AB	AA	AA	AA	AB	AA	Ad	AA	AB	AA	AA	AA	AA	AA	AB	AA	AA	AA	AA	AA	AA	AA	AB	AB	AA	Ad	AA	AA	AB	AA	Ad	Ad	AA	AA	Ad	AA	Ad	AA	AA	Ad	AA
chr1D	145455001	145466000	11000	dd	AA	dd	AA	AA	AA	AA	AA	AA	AA	AA	AA	AA	AA	AA	AA	AA	AA	AA	AA	AA	AA	AA	AA	AA	AA	AA	AB	AA	AA	Ad	AA	AA	AB	AA	Ad	AA	AA	AA	Ad	AA	AA	AA	AA	AA	AA
chr1D	145522001	145530000	8000	AA	AA	dd	Ad	AA	Ad	Ad	AA	Ad	Ad	Ad	Ad	AA	AA	AA	AA	Ad	AA	AA	Ad	AA	AA	AA	AA	AA	AA	AA	Ad	AA	AA	AA	AA	Ad	AA	Ad	AA	Ad	Ad	Ad	Ad	Ad	Ad	Ad	Ad	Ad	Ad
chr1D	145546501	145579000	32500	AA	AA	dd	AA	AA	AA	AA	AA	AA	AA	AA	AA	AA	AA	AA	AA	AA	AA	AA	AA	AA	AA	AA	AA	AA	AA	AA	AA	AA	AA	AA	AA	AA	AA	AA	Ad	AA	AA	AA	AA	AA	AA	AA	AA	AA	AA
chr1D	145853501	145860000	6500	AA	AA	AA	dd	AA	AA	AA	AB	AA	AB	AA	AA	AA	AB	AA	AA	AA	AB	AA	AA	AB	AB	AB	AA	AB	AA	AB	AA	AB	AB	AB	AA	AA	AB	AB	AB	AA	AA	AA	AB	AA	AA	AA	AA	AA	AB
chr1D	145948501	145968500	20000	Ad	Ad	dd	Ad	Ad	Ad	Ad	Ad	Ad	Ad	Ad	Ad	Ad	Ad	Ad	Ad	Ad	Ad	Ad	Ad	Ad	Ad	Ad	Ad	Ad	Ad	Ad	Ad	Ad	Ad	Ad	Ad	Ad	Ad	Ad	Ad	Ad	Ad	Ad	Ad	Ad	Ad	Ad	Ad	Ad	Ad
chr1D	145984001	145990000	6000	AA	Ad	dd	AA	AA	AA	AA	AA	AA	AA	AA	AA	AA	AA	AA	AA	AA	AA	AA	AA	AA	AA	AA	AA	AA	AA	AA	AA	AA	AA	AA	AA	AA	AA	AA	AA	dd	Ad	AA	AA	AA	AA	AA	AA	AA	Ad
chr1D	146310501	146315000	4500	AA	AA	dd	AA	AA	AA	AA	AA	AA	AA	AA	AA	AB	AA	AA	AA	AA	AA	AA	AA	AA	AA	AA	AA	AA	AA	AA	AA	AA	AA	AA	AA	AA	AB	AA	AA	Ad	AA	AA	AA	AA	AA	Ad	AA	AA	AA
chr1D	146617001	146625500	8500	AA	AA	AA	AA	AA	AA	AA	AA	AA	AA	AA	AA	AA	AA	AA	AA	AA	AA	AA	AA	AA	AA	AA	AA	AA	AA	AA	AA	AA	AA	AA	AA	AA	AA	AA	AA	dd	AA	AA	AA	AA	AA	AA	AA	AA	AA
chr1D	146692501	146700000	7500	AA	AB	dd	AB	AB	AB	AB	BB	AB	AB	AB	BB	AB	AB	AB	AB	AB	AB	BB	AB	BB	AB	AB	AB	BB	AA	BB	AB	AB	AB	AB	AB	AB	AA	AB	BB	AA	AA	AB	AB	AB	AB	BB	AB	AB	BB
chr1D	146707001	146715500	8500	AA	AA	dd	AA	AA	AA	AA	AA	AA	AA	AA	AA	AA	AA	AA	AA	AA	AA	AA	AA	AA	AA	AA	AA	AA	AA	AA	AA	AA	AA	AA	AA	AA	AA	AA	Ad	AA	AA	AA	AA	AA	AA	AA	AA	AA	AA
chr1D	146823501	146827500	4000	AA	AA	dd	AB	AA	AA	AA	AA	AA	AA	AA	AA	AA	AA	AA	AA	AA	AA	AA	AA	AA	AA	AB	AA	AA	AA	AA	AA	AA	AA	AA	AA	AA	AA	AA	Ad	AA	AA	AA	Ad	AA	Ad	AA	AA	Ad	AA
chr1D	146848501	146860500	12000	AA	AA	dd	AA	AA	Ad	AA	AA	AA	AA	AA	AA	AA	Ad	AA	AA	AA	Ad	AA	Ad	AA	AA	Ad	AA	AA	AA	AA	AA	AA	AA	AA	Ad	AA	Ad	AA	Ad	dd	AA	Ad	Ad	AA	Ad	AA	Ad	Ad	Ad
chr1D	146868501	146873500	5000	AA	AA	dd	AA	AA	AA	AA	AA	AA	AA	AA	AA	AA	AA	AA	AA	AA	AA	AA	AA	AA	AA	AA	AA	AA	AA	AA	AA	AA	AA	AA	AA	AA	AA	AA	AB	AA	AA	AA	AA	AA	AA	Ad	AA	AA	Ad
chr1D	147137001	147143000	6000	AA	AA	dd	AA	AA	AA	AA	AA	AA	AA	AA	AA	AA	AA	AA	AA	AA	AA	AA	AA	AA	AA	AA	AA	AA	AA	AA	AA	AA	AA	AA	AA	AB	AA	AA	Ad	Ad	Ad	Ad	AA	AA	AA	AA	Ad	Ad	Ad
chr1D	147254501	147260500	6000	Ad	Ad	Ad	Ad	AA	AA	Ad	Ad	Ad	Ad	Ad	Ad	Ad	Ad	Ad	Ad	Ad	Ad	Ad	Ad	Ad	Ad	Ad	Ad	Ad	Ad	Ad	AB	Ad	Ad	AA	Ad	AA	AA	Ad	dd	Ad	AA	AA	Ad	AA	Ad	AA	AA	Ad	AA
chr1D	147357501	147370000	12500	AA	AA	dd	AA	AA	AB	AA	AA	AA	AA	AA	AA	AB	AA	AA	AA	AA	AA	AA	AA	AA	AA	AA	AA	AA	AA	AA	AB	AA	AA	AA	AA	AA	AA	AA	AA	AA	AA	AA	AA	AA	AA	AB	AA	AA	AA
chr1D	147603501	147610000	6500	AA	AA	dd	AA	AB	AA	AA	AA	AA	AA	AA	AA	AA	AA	AA	AA	AA	AA	AA	AA	AA	AA	AB	AA	AA	AA	AA	AB	AA	AB	AA	AA	AA	AA	AA	AA	AA	AA	AA	AA	AA	AA	AA	AA	AA	AA
chr1D	147615501	147628000	12500	AA	AA	dd	AA	AA	AA	AA	AA	AA	AA	AA	AA	AA	AA	AA	AB	AA	AA	AA	AA	AA	AA	AA	AA	AA	AA	AA	AA	AA	AA	AA	AA	AA	AA	AA	AA	dd	AA	AA	AA	AA	AA	AA	AA	AA	AA
chr1D	147697501	147706000	8500	AA	AA	dd	AA	AA	AA	AA	AA	AA	AA	AA	AA	AA	AA	AA	AA	AA	AA	AA	AA	AA	AA	AA	AA	AA	AA	AA	AA	AA	AA	AA	AA	AA	AA	AA	AA	Ad	Ad	Ad	Ad	AA	Ad	Ad	Ad	Ad	Ad
chr1D	147949501	148149000	199500	AA	AA	AA	AA	AA	AA	AA	AA	AA	AA	AA	AA	AA	AA	AA	AA	AA	AA	AA	AA	AA	AA	AA	AA	AA	AA	AA	AA	AA	AA	AA	AA	AA	AA	AA	AA	dd	AA	AA	AA	AA	AA	AA	AA	AA	AA
chr1D	148173501	148178500	5000	AA	AA	AA	AA	Ad	AA	AA	AA	AA	AA	Ad	AA	AA	AA	Ad	AA	AA	AA	AA	AA	AA	AA	Ad	AA	AA	AA	AA	AB	AA	AA	AA	AA	AA	AA	Ad	dd	AA	AA	AA	Ad	AA	Ad	AA	AA	AA	AA
chr1D	148221001	148230000	9000	AA	AA	dd	AA	AA	AA	AA	AA	AA	AA	AA	AA	AA	AA	AA	AA	AA	AA	AA	AA	AA	AA	AA	AA	AA	AA	AA	AA	AA	AA	AA	AA	AA	AA	AA	AB	AA	AA	AA	AA	AA	AA	AA	AA	AA	AA
chr1D	148310501	148322000	11500	AA	AA	dd	AA	AA	AA	AA	AA	AA	AA	AA	AA	AA	AA	AA	AA	AA	AA	AA	AA	AA	AA	AA	AA	AA	AA	AA	AA	AA	AA	AA	AA	AA	AA	AA	Ad	Ad	AA	Ad	Ad	AA	AA	AA	AA	AA	AA
chr1D	148432501	148444000	11500	AA	AA	dd	AA	AA	AA	AA	AA	AA	AA	AA	AA	AA	AA	AA	AA	AA	AA	AA	AA	AA	AA	AA	AA	AA	AA	AA	AA	AA	AA	AA	AA	AA	AA	AA	AA	AA	AB	AA	AA	AA	AA	AA	AA	Ad	AA
chr1D	148449001	148453500	4500	AB	AB	dd	AA	AA	AA	AA	AA	AB	AB	AA	AA	AB	AA	AA	AA	AA	AB	AA	AB	AA	AA	AA	AA	AA	AA	AA	AB	AA	AB	AA	AB	AA	AB	AA	Ad	AA	AA	AA	AA	AA	AA	AA	AA	AA	AA
chr1D	148557501	148566000	8500	AA	AA	Ad	AA	AA	AA	AB	AA	AA	AA	AA	AA	AA	AA	AA	AA	AA	AA	AA	AA	AA	Ad	AA	AA	AA	AA	dd	Ad	AA	AA	AA	AA	AA	AA	AA	Ad	AA	AB	AA	Ad	AA	Ad	AA	AA	AA	AA
chr1D	148571001	148584500	13500	AA	AA	dd	AA	Ad	Ad	Ad	AA	AA	Ad	AA	AA	AA	AA	AA	Ad	AA	AA	Ad	Ad	Ad	Ad	AA	AA	Ad	AA	Ad	AA	Ad	AA	AA	AA	Ad	AA	AA	AA	Ad	AA	Ad	Ad	AA	Ad	Ad	Ad	Ad	Ad
chr1D	148639501	148646500	7000	AA	AA	dd	AA	AA	AA	AA	AA	AA	AA	AA	AA	AA	AA	AA	AA	AA	AA	AA	AA	AA	AA	AA	AA	AA	AA	AA	AA	AA	AA	AA	AA	AA	AA	AA	Ad	AA	Ad	AA	Ad	AA	Ad	AA	Ad	AA	AA
chr1D	148741501	148752000	10500	AA	Ad	dd	AA	AA	AA	AA	AA	AA	AA	AA	AA	AA	AA	AA	AA	AA	AA	AA	AA	AA	AA	AA	AA	AA	AA	AA	AA	AA	AA	AA	AA	AA	AA	AA	AA	Ad	AA	Ad	Ad	AA	Ad	Ad	AA	Ad	Ad
chr1D	148762501	148778000	15500	AA	AA	dd	AA	Ad	AA	AA	AA	AA	AA	AA	AA	AA	Ad	AA	AA	Ad	AA	AA	AA	AA	AA	AA	AA	AA	AA	AA	AA	AA	AA	AA	AA	AA	AA	AA	Ad	AA	AA	Ad	Ad	AA	AA	AA	Ad	Ad	AA
chr1D	148799501	148803500	4000	AA	AA	dd	AA	AA	AA	AA	AA	AA	AA	AA	AA	AA	AA	AA	AA	AA	AA	AA	AA	AA	AA	AA	AA	AA	AA	AA	AA	AA	AA	AA	AA	AA	AA	AA	AA	Ad	Ad	Ad	Ad	AA	Ad	Ad	Ad	Ad	Ad
chr1D	149002001	149014000	12000	AA	Ad	dd	AA	AA	AA	AA	AA	AA	Ad	Ad	AA	AA	AA	AA	AA	AA	Ad	AA	AA	AA	AA	Ad	AA	AA	AA	AA	AA	AA	AA	AA	AA	AA	AA	AA	Ad	Ad	Ad	Ad	AA	AA	Ad	Ad	Ad	Ad	Ad
chr1D	149169501	149178000	8500	AA	AA	dd	AA	AA	AA	AA	AA	AA	AA	AA	AA	AA	AA	AA	AA	AA	AA	AA	AA	AA	AA	AA	Ad	Ad	AA	AA	AA	AA	AA	AA	AA	AA	AA	AA	Ad	AA	AA	Ad	Ad	AA	Ad	Ad	Ad	Ad	Ad
chr1D	149201001	149205500	4500	AA	AA	dd	AA	AB	Ad	AA	AA	AA	AA	AA	AA	AA	AA	Ad	AA	AA	AA	AA	AA	AA	AA	AA	AB	AA	AA	AA	AA	Ad	AA	AA	AA	AA	AA	AA	AA	AA	AA	AA	AB	AA	AA	AA	AA	AA	AA
chr1D	149304001	149318000	14000	AA	AA	dd	AA	AA	AA	AA	AA	AA	AA	AA	AA	AA	AA	AA	AA	AA	AA	AA	AA	AA	AA	AA	AA	AA	AA	AA	AA	Ad	AA	AA	AA	AA	AA	AA	Ad	AA	AA	Ad	AA	AA	AA	AA	AA	Ad	AA
chr1D	149441001	149447000	6000	AA	AA	dd	AA	AA	AA	AA	AB	AA	AA	AA	AA	AA	AA	AA	AA	AA	AA	AA	AA	AA	AA	AA	AA	AA	AA	AA	AA	AA	Ad	AA	AA	AA	AA	AA	AA	Ad	AA	AA	AA	AA	AA	AA	AA	AA	Ad
chr1D	149445501	149453000	7500	AA	AA	AA	AA	AA	AA	AA	AA	AA	AA	AA	AA	AA	dd	AA	AA	AA	AA	AA	AA	AA	dd	dd	AA	AA	AA	AA	Ad	AA	dd	AA	AA	AA	AA	AA	AA	AA	AA	AA	AA	AA	AA	AA	AA	AA	AA
chr1D	149703501	149709000	5500	AA	AA	Ad	AA	AA	AA	AA	Ad	Ad	AA	Ad	AA	Ad	AA	Ad	AA	Ad	Ad	Ad	AA	Ad	Ad	AA	Ad	Ad	Ad	Ad	AB	Ad	AA	AA	AA	AA	AA	Ad	dd	AA	AA	AA	Ad	AA	AA	Ad	AA	Ad	AA
chr1D	149754501	149768500	14000	AA	AA	dd	AA	AA	AA	AA	AA	AA	AA	AA	AA	AA	AA	AA	AA	AA	AA	AA	AA	AA	AA	AA	AA	AA	AA	AA	AA	AA	AA	AA	AA	AA	AA	Ad	Ad	AA	Ad	Ad	Ad	AA	Ad	Ad	Ad	Ad	Ad
chr1D	149818001	149826000	8000	dd	Ad	dd	Ad	Ad	dd	dd	Ad	Ad	Ad	dd	Ad	dd	Ad	Ad	Ad	Ad	Ad	Ad	Ad	Ad	Ad	Ad	Ad	Ad	Ad	Ad	Ad	Ad	Ad	Ad	dd	Ad	Ad	Ad	dd	dd	Ad	dd	dd	Ad	dd	Ad	Ad	dd	Ad
chr1D	149899501	149904000	4500	AB	AB	dd	AA	AB	AA	AB	AA	AA	AB	AB	AB	AB	AA	AA	AB	AA	AB	AA	AA	AA	AA	AB	AB	AA	AA	AB	AA	AA	AB	AA	AB	AA	AA	AA	AB	AB	AA	AA	AB	AA	AA	Ad	AA	AA	AA
chr1D	150005001	150009000	4000	Ad	Ad	dd	Ad	Ad	Ad	Ad	Ad	Ad	Ad	Ad	Ad	AA	Ad	Ad	Ad	Ad	Ad	Ad	AA	Ad	Ad	Ad	Ad	Ad	Ad	Ad	AA	Ad	Ad	Ad	Ad	Ad	Ad	Ad	Ad	dd	Ad	Ad	Ad	Ad	Ad	Ad	Ad	Ad	Ad
chr1D	150061001	150087500	26500	AA	AA	dd	AA	AA	AA	AA	AA	AA	AA	AA	AA	AA	AA	AA	AA	AA	AA	AA	AA	AA	AA	AA	AA	AA	AA	AA	AA	AA	AA	AA	AA	Ad	AA	AA	Ad	Ad	Ad	AA	Ad	AA	Ad	AA	Ad	Ad	AA
chr1D	150114001	150122000	8000	AA	Ad	dd	Ad	Ad	Ad	Ad	Ad	Ad	Ad	Ad	Ad	Ad	AA	Ad	Ad	Ad	Ad	Ad	Ad	Ad	Ad	Ad	Ad	Ad	Ad	Ad	AB	Ad	Ad	AA	Ad	Ad	AA	Ad	dd	Ad	AA	Ad	Ad	AA	Ad	Ad	Ad	Ad	Ad
chr1D	150162001	150170500	8500	AA	AA	dd	AA	AA	AA	AA	AA	AA	AA	AA	AA	AA	AA	AA	Ad	AA	AA	AA	AA	AA	AA	AA	AA	AA	AA	AA	Ad	AA	AA	AA	AA	AA	AA	AA	Ad	Ad	Ad	Ad	Ad	Ad	Ad	Ad	Ad	Ad	Ad
chr1D	150204501	150209000	4500	AA	AA	AA	AA	AA	AA	dd	Ad	AA	AA	AA	AA	AA	AA	AA	AA	AA	AA	AA	AA	AA	AA	AA	AA	Ad	AA	AA	AB	AB	AA	AA	AA	AA	AA	AA	AA	AA	AB	AA	AA	AA	AA	AA	AA	AA	AA
chr1D	150494501	150501000	6500	AA	Ad	AA	AA	AA	AA	AA	AA	AA	AA	AA	AA	AA	AA	AA	AA	AA	Ad	AA	AA	AA	AA	AA	AA	AA	AA	AA	AA	AA	AA	AA	AA	AA	AA	AA	AA	dd	AA	AA	AB	AA	AA	AA	AA	AA	AA
chr1D	150651001	150657000	6000	AA	AA	dd	AA	AA	AA	AA	AA	AA	AA	AA	AA	AB	AA	AA	AA	AA	AA	AA	AA	AA	AA	AA	AA	AA	AA	AA	AA	AA	AA	AA	AA	AA	AA	AA	AA	AA	AA	AA	AA	AA	AA	AB	AA	AA	AB
chr1D	150696001	150738000	42000	AA	AA	AA	AA	AA	AA	AA	AA	AA	AA	AA	AA	AA	AA	AA	AA	AA	dd	AA	AA	AA	AA	AA	AA	AA	AA	AA	AA	AA	AA	AA	AA	dd	AA	AA	dd	AA	AA	AA	AA	AA	AA	AA	dd	AA	AA
chr1D	150771501	150785500	14000	AA	AA	dd	AA	AA	AA	AA	AA	AA	AA	AA	AA	AA	AA	AA	AA	AA	AA	AA	AA	AA	AA	AA	AA	AA	AA	AA	AA	AA	AA	AA	AA	AA	AA	AA	Ad	Ad	Ad	Ad	Ad	AA	AA	AA	Ad	Ad	Ad
chr1D	150825001	150834000	9000	AA	AA	dd	AA	AB	AB	BB	AB	AA	AB	AB	AB	AB	AB	AB	AB	AB	AA	AA	AB	AB	AB	AB	AB	AA	AB	AB	AB	AB	AB	AB	AB	AB	AA	AB	AB	AB	BB	AB	AB	AB	AB	AA	AB	AB	AA
chr1D	150960501	150964500	4000	Ad	Ad	dd	Ad	Ad	dd	Ad	Ad	Ad	Ad	Ad	Ad	Ad	Ad	Ad	Ad	Ad	Ad	Ad	Ad	Ad	Ad	dd	Ad	Ad	Ad	Ad	Ad	Ad	Ad	dd	Ad	Ad	Ad	Ad	Ad	dd	dd	dd	Ad	Ad	dd	dd	dd	Ad	dd
chr1D	150960501	150969500	9000	Ad	Ad	dd	Ad	Ad	Ad	Ad	Ad	Ad	Ad	Ad	Ad	Ad	Ad	Ad	Ad	AA	Ad	Ad	AA	Ad	Ad	AA	Ad	Ad	Ad	Ad	Ad	Ad	Ad	Ad	Ad	Ad	Ad	Ad	Ad	dd	Ad	Ad	Ad	Ad	Ad	dd	Ad	Ad	Ad
chr1D	150991001	150995500	4500	AA	AA	dd	AA	AA	Ad	AA	Ad	Ad	AA	AA	AA	AA	AA	Ad	AA	AA	AA	AA	AA	AA	AA	Ad	AA	AA	AA	AA	AA	AA	AA	AA	AA	Ad	AA	AA	Ad	Ad	Ad	Ad	AA	AA	Ad	Ad	Ad	Ad	Ad
chr1D	151117001	151124000	7000	AA	AA	dd	AA	AA	AA	AA	AA	AA	AA	AA	AA	AA	AA	AA	AA	AA	AA	AA	AA	AA	AA	AA	AA	AA	AA	AA	AA	AA	AA	AA	AA	AA	AA	AA	AA	AA	AA	AA	AA	AA	AA	AA	AA	AA	AA
chr1D	151385001	151390000	5000	AA	AA	dd	AA	Ad	AA	AA	AA	AA	AA	AA	AA	AA	AA	AA	AA	AA	AA	AA	AA	AA	AA	AA	Ad	AA	AA	AA	AA	AA	AA	Ad	Ad	AA	Ad	Ad	AA	Ad	AA	AA	Ad	AA	Ad	AA	AA	AA	AA
chr1D	151498001	151504500	6500	AA	AA	dd	AA	AA	AA	AA	AA	AA	AA	AA	AA	AA	AA	AA	AA	AA	AA	AA	AA	AA	AA	AA	AA	AA	AA	AA	AA	AA	AA	AA	AA	AA	AA	AA	AA	AA	AA	AA	AA	AA	AA	AA	AA	AA	AA
chr1D	151705501	151711500	6000	AA	AA	dd	AA	AA	AA	AA	AA	AA	AA	AA	AA	AA	AA	AA	AA	AA	AA	AA	AA	AA	AA	AA	AA	AA	AA	AA	AA	AA	AA	AA	AA	AA	AA	AA	AA	AA	AA	AA	AA	AA	AA	AA	AA	AA	AB
chr1D	151763001	151773500	10500	AA	AA	dd	AA	AA	AA	AA	AA	AA	AA	AA	AA	AA	AA	AA	AA	AA	AA	AA	AA	AA	AA	AA	AA	AA	AA	AA	AA	AA	AA	AA	AA	AA	AA	AA	AA	AA	Ad	AA	AA	AA	AA	AA	AA	AA	AA
chr1D	151791501	151810500	19000	AA	AA	dd	AA	AA	AA	AA	AA	AA	AA	AA	AA	AA	AA	AA	AA	AA	AA	AA	AA	AA	AA	AA	AA	AA	AA	AA	AA	AA	AA	AB	AA	AA	AA	AA	AA	AA	AA	AA	AA	AA	AA	AA	AA	AA	AA
chr1D	151821501	151832000	10500	Ad	Ad	dd	Ad	Ad	Ad	Ad	dd	Ad	Ad	Ad	Ad	Ad	Ad	Ad	Ad	Ad	Ad	Ad	Ad	Ad	Ad	Ad	Ad	Ad	Ad	Ad	dd	Ad	Ad	Ad	Ad	Ad	Ad	Ad	dd	dd	dd	Ad	Ad	Ad	Ad	Ad	Ad	Ad	dd
chr1D	151930001	151936500	6500	AB	AA	AA	AA	AA	AA	AA	AA	AA	AA	AA	AA	AA	AA	AA	AA	AA	AA	AA	AA	AA	AA	AA	AA	AA	AA	AA	AA	AA	AA	AA	AA	AA	AA	AA	AA	Ad	AA	AA	AA	AA	AA	AB	AA	AA	BB
chr1D	152055501	152066500	11000	AA	AA	dd	AA	AA	AA	AA	AA	AA	AA	AA	AA	AA	AA	AA	AA	AA	AA	AA	AA	AA	AA	AA	AA	AA	AA	AA	AA	AA	AA	AA	AA	AA	AA	AA	AA	AA	AA	AA	AB	AA	AA	AA	AA	AA	AA
chr1D	152085001	152089500	4500	AA	AA	AA	AA	AA	AA	AA	AA	AA	AA	AA	dd	dd	AA	AA	AA	dd	AA	AA	AA	AA	AA	AA	AA	AA	Ad	AA	AA	AA	AA	AA	AA	AA	AA	AA	AA	AA	AA	AA	dd	AA	dd	dd	AA	AA	AA
chr1D	152099001	152109500	10500	AA	AA	dd	AA	AA	AA	AA	AA	AA	AA	AA	AA	AA	AA	AA	AA	AA	AA	AA	AA	AA	AA	AA	AA	AA	AA	AA	AA	AA	AA	AA	AA	AA	AA	AA	AA	Ad	AA	AA	AA	AA	AA	Ad	Ad	Ad	AA
chr1D	152115501	152126000	10500	AA	AA	dd	AA	Ad	Ad	Ad	Ad	AA	Ad	AA	AA	AA	AA	AA	AA	AA	AA	AA	Ad	AA	Ad	Ad	AA	AA	Ad	AA	AA	Ad	AA	AA	AA	AA	AA	AA	AA	Ad	AA	AA	AA	AA	Ad	AA	Ad	Ad	AA
chr1D	152232001	152239000	7000	Ad	AA	dd	AA	AA	AA	AA	AA	AA	AA	AA	AA	AA	Ad	AA	AA	Ad	AA	AA	AA	AA	Ad	Ad	AA	AA	AA	AA	Ad	AA	Ad	AA	AA	AA	AA	AA	AA	dd	Ad	AA	AA	AA	AA	AA	Ad	AA	AA
chr1D	152457501	152462500	5000	AA	AA	dd	dd	AA	AA	AA	AA	AA	AA	AA	AA	AA	AA	AA	AA	AA	AA	AA	AA	AA	AA	AA	AA	AA	AA	AA	AB	AA	AA	AA	AA	AA	AA	AB	Ad	AA	AA	AA	Ad	AA	AA	AA	AA	dd	dd
chr1D	152592001	152624000	32000	AA	AA	dd	AA	AA	AA	AA	AA	AA	AA	AA	AA	AA	AA	AA	AA	AA	AA	AA	AA	AA	AA	AA	AA	AA	AA	AA	AA	AA	AA	AA	AA	AA	AA	AA	AA	dd	AA	AA	AA	AA	AA	AB	AA	AA	AB
chr1D	152661501	152666000	4500	AA	Ad	dd	AA	AA	AA	AA	AA	AA	AA	AA	AA	AA	AA	AA	AA	AA	AA	AA	AA	AA	AA	AA	AA	AA	AA	AA	AA	Ad	AA	AA	AA	AA	AA	AA	Ad	dd	AA	Ad	Ad	AA	Ad	AA	Ad	Ad	Ad
chr1D	152796001	152800000	4000	AA	AA	AA	AA	AA	AA	Ad	AA	AA	Ad	Ad	AA	AA	AA	AA	AA	Ad	AA	AA	AA	AA	AA	Ad	AA	AA	AA	Ad	AB	AA	AA	AA	AA	AA	AA	AA	AA	dd	AB	AA	AA	AA	AA	AA	AA	AA	AA
chr1D	152961501	152971000	9500	AA	AA	dd	AA	AA	AA	AA	Ad	AA	Ad	AA	AA	AA	AA	AA	AA	AA	AA	AA	Ad	AA	AA	AA	AA	AA	AA	AA	AA	AA	AA	Ad	AA	AA	AA	AA	AA	AA	AA	Ad	Ad	AA	Ad	AA	Ad	Ad	AA
chr1D	152985001	152991000	6000	AA	AA	dd	AA	AA	AA	AA	AA	AA	AA	AA	AA	AA	AA	AA	AA	AA	AA	AA	AA	AA	AA	AA	AB	AA	AA	AA	AB	AA	AA	AA	AA	AA	AA	AA	AA	AA	AB	AA	AA	AA	AA	AA	AA	AA	AA
chr1D	153113501	153120000	6500	AA	AA	dd	AA	AA	Ad	AA	Ad	AA	AA	AA	AA	AA	AA	AA	AA	AA	AA	AA	AA	AA	AA	AA	AA	AA	AA	AA	AB	AA	AA	AA	AA	AA	AA	AA	AA	AA	AB	AA	AA	AA	AA	AA	AA	AA	AA
chr1D	153158501	153169000	10500	AA	AA	dd	AA	AA	AA	AA	AA	AA	AA	AA	AA	AA	AA	AA	AA	AA	AA	AA	AA	AA	AA	AA	AA	AA	AA	AA	AA	AA	AA	AA	AA	AA	AA	AA	AA	Ad	AA	Ad	AA	AA	AA	AA	AA	AA	Ad
chr1D	153175001	153182000	7000	AA	AA	dd	AA	AA	AA	AA	AA	AA	AA	AA	AA	AA	AA	AA	AA	AA	AA	AA	AA	AA	AA	AA	AA	AA	AA	AA	AA	AA	AB	AA	AA	AA	AA	AA	AB	AA	AA	AA	AA	AA	AA	AA	AA	AA	AA
chr1D	153362001	153369000	7000	AA	AA	Ad	AA	AA	AA	AA	AA	AA	AA	AA	AA	AA	AA	AA	AA	AA	AA	AA	AA	AA	AA	AA	AA	AA	AA	AA	AA	AA	AA	AA	AA	AA	AA	AA	AA	dd	AA	AA	AA	AA	AA	AA	AA	AA	AA
chr1D	153372001	153377000	5000	AA	AB	Ad	AA	AA	AB	AA	AA	AA	AA	AA	AA	AA	AA	AA	AA	AA	AA	AA	AA	AA	AA	AA	AA	AA	AA	AA	AA	AA	AA	AA	AA	AA	AA	AA	Ad	dd	AA	Ad	Ad	AA	AA	AA	AA	AA	AA
chr1D	153408501	153412500	4000	AA	AA	dd	AB	AB	AA	AA	AA	AA	AA	AA	AA	AA	AB	AA	AA	AA	AB	AB	AB	AA	AB	AA	AA	AA	AA	AA	AA	AB	AA	AA	AB	AA	AA	AA	AB	dd	AA	AA	AA	AA	AA	AA	AA	AA	AA
chr1D	153410001	153420500	10500	AA	AA	dd	AA	AA	AA	AA	AA	AA	AA	AA	AA	AA	AA	AA	AA	AA	AA	AA	AA	AA	AA	AA	AA	AA	AA	AA	AA	AA	AA	AB	AA	AA	AA	AA	AA	AA	AA	AA	AA	AA	AA	AA	AA	AA	AA
chr1D	154136501	154156000	19500	AA	AA	dd	AA	AA	AA	AA	AA	AA	AA	AA	AA	AA	AA	AA	AA	AA	AA	AA	AA	AA	AA	AA	AA	AA	AA	AA	AA	AA	AA	AA	AA	AA	AA	AA	Ad	Ad	Ad	Ad	Ad	AA	Ad	Ad	Ad	Ad	AA
chr1D	154189501	154201000	11500	AA	AA	dd	AA	AA	AA	AA	AA	AA	AA	AA	AA	AA	AA	AA	AA	AA	AA	AA	AA	AA	AA	AA	AA	AA	AA	AA	AA	AA	AA	AA	AA	AA	AA	AA	AA	Ad	AA	AA	Ad	AA	AA	AA	AA	AA	AA
chr1D	154417501	154422000	4500	AA	AA	dd	AA	AA	AA	AA	AA	AA	AB	AA	AA	AA	AB	AA	AA	AA	AA	AA	AA	AA	AA	AA	AA	AA	AA	AA	AA	AB	AA	AB	AB	AA	AA	Ad	AA	Ad	AA	AA	AA	AA	AA	AA	AA	AA	AA
chr1D	154543501	154548000	4500	AA	AA	AA	AA	AB	AA	AA	AA	AA	AA	AA	AA	AA	AA	AA	AA	AA	AA	AA	AA	AA	AB	AA	AA	AA	AA	AA	AA	AA	AA	AA	AA	AA	AA	AA	BB	dd	AA	AA	AB	AA	AB	Ad	AA	AA	AA
chr1D	154722501	154728000	5500	AA	AA	AA	AA	AA	AB	AA	AA	AB	AA	AA	AB	AA	AA	AA	AB	AA	AA	AA	AA	AA	Ad	AB	AA	AB	AA	AA	AA	AA	AB	AA	AB	AA	AA	AB	BB	Ad	AA	AA	AB	AB	AB	AB	AA	AA	BB
chr1D	154728001	154737000	9000	Ad	Ad	dd	AA	AA	Ad	Ad	Ad	Ad	Ad	AA	AA	AA	Ad	AA	AA	Ad	Ad	AA	Ad	AA	Ad	Ad	Ad	Ad	AA	Ad	Ad	Ad	Ad	Ad	Ad	Ad	Ad	Ad	AA	AA	Ad	AA	AA	AA	AA	AA	Ad	AA	AA
chr1D	154745501	154755000	9500	AA	Ad	dd	Ad	Ad	AA	Ad	AA	AA	Ad	AA	AA	Ad	AA	AA	AA	Ad	AA	Ad	Ad	AA	Ad	Ad	AA	AA	AA	Ad	AA	Ad	Ad	Ad	Ad	AA	Ad	Ad	AA	AA	AA	Ad	Ad	AA	Ad	Ad	Ad	Ad	Ad
chr1D	154896001	154909500	13500	AA	AA	AA	AB	AA	AA	AA	AA	AA	AA	AA	AA	AA	AA	AA	AA	AA	AA	AA	AA	AA	AA	AA	AA	AA	AA	AA	AA	AA	AA	AA	AA	AA	AA	AA	AA	AA	AB	AA	AA	AA	AA	AA	AA	AA	AA
chr1D	154911001	154915000	4000	AA	dd	Ad	AA	dd	AA	AA	AA	AA	AA	AA	dd	dd	AA	dd	AA	dd	AA	AA	AA	AA	AA	AA	AA	AA	AA	AA	AA	AA	AA	AA	AA	AA	AA	AB	AA	Ad	AA	dd	dd	AA	dd	dd	AA	AA	AA
chr1D	154957501	154962000	4500	AA	AA	dd	Ad	AA	Ad	AA	Ad	AA	AA	AA	AA	AA	AA	AA	AA	AA	Ad	AA	AA	AA	Ad	AA	AA	Ad	AA	AA	AB	Ad	AA	AA	AA	AA	Ad	AA	Ad	Ad	AA	AA	Ad	AA	Ad	Ad	Ad	Ad	Ad
chr1D	154987001	154998500	11500	AA	AA	dd	AA	AA	AA	AA	AA	AA	AA	AA	AA	AA	AA	AB	AA	AA	AA	AA	AA	AA	AA	AA	AA	AA	AA	AA	AA	AA	AA	AA	AA	AA	AA	AA	AB	AA	AA	AA	AA	AA	AA	AB	AA	AA	AA
chr1D	155075001	155084000	9000	AA	AA	dd	AA	AA	AA	AA	AA	AB	AA	AA	AA	AA	AA	AB	AA	AA	AA	AA	AA	AA	AA	AA	AA	AA	AA	AA	AA	AA	AB	AA	AA	AA	AA	AA	AA	dd	AA	AA	AA	AA	AA	AA	AA	AA	AB
chr1D	155087001	155091500	4500	AA	AA	dd	AA	AA	AA	AB	AA	AA	AA	AA	AA	AA	AB	AA	AA	AA	AA	AA	AA	AB	AA	AA	Ad	AB	AA	AA	AB	AB	AB	AB	AA	AB	AB	AA	Ad	dd	AB	AA	Ad	AA	Ad	AA	AA	AA	AA
chr1D	155160501	155169500	9000	AA	AA	dd	AA	AA	AA	AA	AA	AA	AA	AA	AA	AA	AA	AA	AA	AA	AA	AA	AA	AA	AA	AA	AA	AA	AA	AA	AA	AA	AA	AA	AA	AB	AA	AA	AA	AA	AA	AA	AA	AA	AA	AA	AA	AA	AB
chr1D	155312501	155321500	9000	AA	AA	dd	AA	AA	AA	AA	AA	AA	AA	AA	AA	AA	AA	AA	AA	AA	AA	AA	AA	AA	AA	AA	AA	AA	AA	AA	AA	AA	AA	AA	AA	AA	Ad	AA	AA	AA	Ad	AA	AA	AA	Ad	AA	Ad	AA	Ad
chr1D	155367001	155374500	7500	AA	AA	dd	AA	AA	AA	AA	AA	AB	AB	AA	AA	AA	AA	AA	AA	AB	AA	AA	AA	AA	AA	AA	AA	AA	AA	AA	AA	AA	AA	AA	AA	AA	AA	AA	AA	AA	Ad	AA	AA	AA	AA	AA	Ad	AA	Ad
chr1D	155565001	155576000	11000	AA	AA	AA	AA	AA	AA	AA	AA	AA	Ad	AA	AA	AA	AA	AA	AA	AA	AA	AA	AA	AA	AA	AA	AA	AA	AA	AA	AA	AA	AA	AA	AA	AA	AA	AA	AB	dd	AA	AA	AB	AA	AA	AA	AA	AA	AA
chr1D	155657001	155665000	8000	AA	AA	dd	AA	AA	AA	AA	AA	AA	AA	AA	AA	AA	AA	AA	AA	AA	AA	AA	AA	AA	Ad	AA	AA	AA	AA	AA	AA	AA	AA	AA	AA	AA	AA	AA	Ad	AA	Ad	Ad	Ad	AA	Ad	AA	Ad	Ad	AA
chr1D	155786001	155801000	15000	AA	AA	dd	AA	AA	AA	AA	AA	AA	AA	AA	AA	AA	AA	AA	AA	AA	AA	AA	AA	AA	AA	AA	AA	AA	AA	AA	AA	AA	AA	AA	AA	AA	AA	AA	Ad	AA	AA	Ad	Ad	AA	Ad	AA	Ad	Ad	AA
chr1D	156404501	156423500	19000	AA	AA	dd	AA	AA	AA	AA	AA	AA	AA	AA	AA	AA	AA	AA	AA	AA	AA	AA	AA	AA	AA	AA	AA	AA	AA	AA	AB	AA	AA	AA	AA	AA	AB	AA	Ad	AA	AA	AA	Ad	AA	AA	AA	AA	AA	AA
chr1D	156477501	156482500	5000	AA	AA	dd	Ad	AA	Ad	Ad	Ad	Ad	AA	Ad	Ad	Ad	AA	AA	Ad	Ad	Ad	Ad	Ad	Ad	AA	AA	Ad	Ad	AA	Ad	Ad	Ad	Ad	AA	AA	Ad	Ad	Ad	Ad	Ad	Ad	Ad	Ad	Ad	Ad	Ad	Ad	Ad	Ad
chr1D	156571501	156596500	25000	AA	AA	Ad	AA	AA	AA	AA	AA	AA	AA	AA	AA	AA	AA	AA	AA	AA	AA	AA	AA	AA	AA	AA	AA	AA	AA	dd	Ad	AA	AA	AA	AA	AA	AA	AA	Ad	AA	AA	AA	AA	AA	AA	AA	AA	AA	AA
chr1D	156847001	156852500	5500	AA	AA	dd	AA	AA	AB	AA	AA	AA	AA	AA	AA	AA	AA	AA	AA	Ad	AA	AA	AA	AA	AA	AA	AA	AA	AA	AA	BB	AA	AA	AA	AA	AA	AA	AA	Ad	AA	AA	AA	Ad	AA	Ad	AA	AA	AA	AA
chr1D	156938001	156951500	13500	AA	AA	dd	Ad	AA	AA	AA	AA	AA	AA	AA	Ad	AA	AA	AA	AA	AA	Ad	AA	AA	AA	Ad	AA	Ad	AA	Ad	AA	AA	AA	AA	Ad	AA	AA	AA	AA	Ad	Ad	Ad	Ad	Ad	AA	Ad	AA	Ad	Ad	Ad
chr1D	156976001	156985000	9000	AA	AA	AA	AA	AA	AA	AA	AA	AA	AA	AA	AA	AA	AA	AA	AA	AA	AA	AA	AA	AA	AA	AA	AA	AA	AA	AA	AA	AA	AA	AA	AA	AA	AA	AA	AA	dd	AA	AA	AA	AA	AA	AA	AA	AA	AB
chr1D	157012001	157016000	4000	AA	AA	AA	AA	AB	AA	AA	AA	AB	AA	AA	AB	AA	AA	AA	AA	AA	AA	AB	AA	AA	AA	AB	AA	AA	AA	AB	AB	AA	AA	AB	AA	AA	AB	AA	Ad	dd	AA	AA	AA	AA	AA	AA	AA	AA	AA
chr1D	157029501	157033500	4000	AA	AB	dd	AA	AA	AA	AA	AA	AA	AA	AA	AA	AA	AA	AA	AA	AA	AA	AA	AA	AA	AA	AA	AA	AA	AA	AA	AA	AA	AA	AA	AB	AA	AA	AA	Ad	AA	AA	AA	AA	AA	AA	AA	AA	Ad	AA
chr1D	157055001	157059500	4500	AA	AA	AA	AA	AA	AB	AA	AA	AA	AA	AA	AA	AA	AA	AA	AA	AA	AA	AA	AA	AA	AA	AB	AA	AA	AA	AA	AB	AA	AA	AA	AA	AA	AA	AA	dd	AA	AA	AA	Ad	AA	AA	AA	AA	AA	AA
chr1D	157077001	157081000	4000	AA	AA	dd	AA	AA	AA	AA	AA	AA	AA	Ad	AA	AA	AA	AA	AA	Ad	AA	AA	AA	AB	AA	AA	AA	Ad	AA	AA	AA	AA	AA	AA	AA	AA	AA	AA	Ad	Ad	AA	Ad	Ad	AA	Ad	Ad	AA	Ad	Ad
chr1D	157101001	158419000	1318000	dd	AA	AA	AA	AA	AA	AA	AA	AA	AA	AA	AA	AA	AA	AA	AA	AA	AA	AA	AA	AA	AA	AA	AA	AA	AA	AA	AA	AA	AA	AA	AA	AA	AA	AA	AA	AA	AA	AA	AA	AA	AA	AA	AA	AA	AA
chr1D	158401501	158426500	25000	Ad	Ad	dd	Ad	AA	Ad	Ad	Ad	Ad	Ad	Ad	AA	Ad	Ad	AA	AA	AA	Ad	AA	AA	AA	Ad	Ad	AA	AA	Ad	Ad	Ad	Ad	Ad	Ad	Ad	Ad	Ad	AA	AB	AB	AA	AA	AA	AA	AA	AA	Ad	AA	AA
chr1D	158443001	158447500	4500	AA	AB	dd	AB	AB	AA	AA	AA	AB	AB	AA	AA	AB	AB	AB	AA	AA	AB	AA	AA	AB	AA	AB	AA	AA	AA	AA	AB	AB	AA	AB	AB	AA	AB	AA	dd	Ad	AA	AA	Ad	AA	AA	AA	AA	AA	AA
chr1D	158455001	158470500	15500	AA	AA	dd	AA	AA	AA	AA	AA	AA	AA	AA	AA	AA	AA	AA	AA	AA	AA	AA	AA	AA	AA	AA	AA	AA	AA	AA	AA	AA	AA	AA	AA	AA	AA	AA	AB	AA	AA	AA	AA	AA	AA	BB	AA	AA	BB
chr1D	158492001	158501500	9500	Ad	Ad	AA	Ad	Ad	Ad	Ad	Ad	Ad	Ad	Ad	Ad	Ad	Ad	Ad	Ad	Ad	Ad	Ad	Ad	Ad	Ad	Ad	Ad	Ad	Ad	Ad	Ad	Ad	Ad	Ad	Ad	Ad	Ad	Ad	Ad	Ad	Ad	Ad	Ad	Ad	Ad	AB	Ad	Ad	Ad
chr1D	158564001	158570500	6500	AA	AA	dd	AA	AA	AB	AB	AB	AA	AB	AB	BB	BB	AB	AA	BB	AB	AB	BB	AA	AB	AA	AB	AB	BC	AB	AA	AB	AA	AB	AB	AB	AB	AA	BB	BC	Ad	AA	BB	AB	BC	AA	BC	AA	AA	AB
chr1D	158683501	158689000	5500	AA	BB	dd	BC	AB	AB	AB	BB	AB	AB	BB	BB	AB	AB	BB	BB	BB	BB	BB	BB	AB	AB	AA	BB	BC	AB	AB	BB	AA	AB	AB	AB	AB	AB	BB	AB	dd	AA	AB	AB	BB	AB	BB	AA	AB	BB
chr1D	158721001	158735000	14000	AA	AA	dd	AA	AA	AA	AA	AA	AA	AA	AA	AA	AA	AA	AA	AA	AA	AA	AA	AA	AA	AA	AA	AA	AA	AA	AA	AB	AA	AA	AA	AA	AA	AA	AA	Ad	AA	AA	AA	Ad	AA	Ad	AA	AA	Ad	AA
chr1D	158953001	158965500	12500	AA	AA	dd	AA	AA	AA	AA	AA	AA	AA	AA	AA	AA	AA	AA	AA	AA	AA	AA	AA	AA	AA	AA	AA	AA	AA	AA	AA	AA	AA	AA	AA	AA	AA	AA	AA	dd	Ad	Ad	Ad	AA	AA	AA	AA	AA	Ad
chr1D	159435001	159447500	12500	AA	AA	dd	AA	AA	AA	AA	AA	AA	AA	AA	AA	AA	AA	AA	AA	AA	AA	AA	AA	AA	AA	AA	AA	AA	AA	AA	AA	AA	AA	AA	AA	AA	AA	AA	Ad	Ad	AA	Ad	Ad	AA	AA	AA	AA	Ad	Ad
chr1D	159494501	159506500	12000	AA	AA	dd	AA	AA	AA	AA	AA	AA	AA	AA	AA	AA	AA	AA	AA	AA	AA	AA	AA	AA	AA	AA	AA	AA	AA	AA	AA	AA	AA	AA	AA	AA	AA	AA	AA	AA	AA	AA	AA	AA	AA	AA	AA	Ad	AA
chr1D	159583501	159590000	6500	AA	AA	dd	AA	AA	AA	Ad	AA	AA	AA	AA	AA	AA	AA	AA	AA	AA	AA	AA	AA	AA	AA	AA	AA	AA	AA	AA	AA	AA	AA	AA	AA	AA	AA	AA	AA	AA	AA	AA	AA	AA	AA	AA	AA	AA	AB
chr1D	159684001	159689000	5000	Ad	Ad	dd	Ad	Ad	Ad	Ad	Ad	Ad	dd	Ad	Ad	Ad	Ad	Ad	Ad	Ad	Ad	Ad	Ad	Ad	Ad	Ad	Ad	Ad	Ad	Ad	Ad	Ad	Ad	Ad	Ad	Ad	Ad	Ad	dd	Ad	dd	Ad	Ad	Ad	Ad	dd	Ad	dd	Ad
chr1D	159721001	159728000	7000	AA	Ad	dd	AA	AA	AA	AA	AA	AA	AA	AA	AA	AA	AA	AA	AA	AA	AA	Ad	AA	AA	AA	AA	AA	AA	AA	AA	AA	AA	AA	AA	AA	AA	AA	AA	Ad	Ad	AA	Ad	AA	AA	Ad	AA	Ad	Ad	Ad
chr1D	159939501	159943500	4000	AA	Ad	dd	AA	AA	AA	Ad	AA	Ad	AA	Ad	AA	AA	AA	AA	AA	Ad	AA	AA	AA	Ad	AA	AA	AA	AA	AA	Ad	Ad	AA	AA	AA	AA	AA	Ad	AA	dd	Ad	AA	Ad	Ad	AA	Ad	AA	Ad	Ad	Ad
chr1D	159966501	159974500	8000	AA	Ad	dd	AA	Ad	Ad	AA	AA	AA	AA	AA	AA	AA	AA	AA	AA	AA	Ad	AA	Ad	AA	AA	AA	AA	AA	AA	AA	Ad	Ad	AA	AA	AA	Ad	AA	AA	AA	Ad	Ad	Ad	Ad	AA	Ad	Ad	Ad	Ad	Ad
chr1D	160021501	160025500	4000	AA	Ad	dd	AA	AA	AA	AA	AA	AA	AA	AA	Ad	AA	AA	AA	Ad	AA	AA	AA	AA	Ad	AA	AA	AA	Ad	AA	AA	AA	AA	AA	AA	AA	AA	AA	AA	Ad	Ad	Ad	Ad	Ad	AA	Ad	Ad	Ad	Ad	Ad
chr1D	160303001	160307000	4000	dd	dd	dd	dd	dd	dd	dd	dd	dd	dd	dd	dd	dd	dd	dd	dd	dd	dd	dd	dd	dd	dd	dd	dd	dd	dd	dd	dd	dd	dd	dd	dd	dd	dd	dd	dd	dd	dd	dd	dd	dd	dd	dd	dd	dd	dd
chr1D	160454501	160462500	8000	Ad	Ad	dd	Ad	Ad	Ad	Ad	Ad	Ad	Ad	Ad	Ad	Ad	Ad	Ad	Ad	Ad	Ad	Ad	Ad	Ad	Ad	Ad	Ad	Ad	Ad	Ad	Ad	Ad	Ad	Ad	Ad	Ad	Ad	Ad	Ad	Ad	Ad	Ad	Ad	Ad	Ad	Ad	Ad	Ad	Ad
chr1D	160515001	160519000	4000	Ad	Ad	dd	Ad	Ad	Ad	Ad	AA	Ad	AA	AA	Ad	Ad	Ad	AA	Ad	Ad	Ad	Ad	AA	Ad	Ad	Ad	AA	Ad	Ad	Ad	AA	Ad	Ad	Ad	AA	Ad	AA	Ad	Ad	AA	Ad	Ad	Ad	Ad	Ad	Ad	Ad	Ad	Ad
chr1D	160709501	160716500	7000	AA	AA	dd	AA	AA	AA	AA	AA	AA	AA	AA	AA	AA	AA	AA	AA	AA	AA	AA	AA	AA	AA	AA	AA	AA	AA	AA	AA	AA	AA	AA	AA	AA	AA	AA	AA	AA	AA	AA	AA	AA	AA	AA	AA	AA	AA
chr1D	160724001	160743500	19500	AA	AA	dd	AA	AA	AA	AA	AA	AA	AA	AA	AA	AA	AA	AA	AA	AA	AA	AA	AA	AA	AA	AA	AA	AA	AA	AA	AA	AA	AA	AA	AA	AA	AA	AA	AA	AA	AA	AA	AA	AA	AA	AA	AA	AA	AA
chr1D	160881001	160901500	20500	Ad	AA	dd	Ad	Ad	Ad	Ad	Ad	Ad	Ad	Ad	Ad	Ad	Ad	Ad	Ad	Ad	Ad	Ad	Ad	Ad	Ad	AA	Ad	Ad	Ad	Ad	AA	AA	Ad	AA	Ad	Ad	Ad	Ad	dd	Ad	Ad	Ad	dd	AA	Ad	Ad	Ad	Ad	Ad
chr1D	160972501	160982000	9500	Ad	Ad	dd	Ad	Ad	Ad	Ad	Ad	Ad	Ad	AA	Ad	Ad	Ad	AA	Ad	Ad	Ad	AA	Ad	Ad	Ad	Ad	Ad	Ad	AA	Ad	Ad	Ad	Ad	Ad	Ad	Ad	Ad	Ad	Ad	Ad	Ad	Ad	Ad	Ad	Ad	Ad	Ad	Ad	Ad
chr1D	161339501	161351000	11500	AA	AA	dd	AA	AA	AA	AA	AA	AA	AA	AA	AA	AA	AA	AA	AA	AA	AA	AA	AA	AA	AA	AA	AA	AB	AA	AA	AA	AA	AA	AA	AA	AA	AA	AA	AA	AA	AA	AA	AA	AA	AA	AA	AA	AA	AA
chr1D	161507001	161528000	21000	AA	AA	dd	AA	AA	AA	AA	AA	AA	AA	AA	AA	AA	AA	AA	AA	AA	AA	AA	AA	AA	AA	AA	AA	AA	AA	AA	AA	AA	AA	AA	AA	AA	AA	AA	AA	Ad	AA	Ad	Ad	AA	Ad	Ad	Ad	Ad	Ad
chr1D	161534001	161540000	6000	AA	AA	dd	AA	AA	AA	AA	AA	AA	AA	AA	AA	AA	AA	AA	AA	AA	AA	AA	AA	AA	AA	AA	AA	AA	AA	AA	AA	AA	AA	AA	AA	AA	AA	AA	Ad	Ad	Ad	Ad	AA	AA	AA	Ad	AA	AA	Ad
chr1D	161738501	161744500	6000	AA	AA	dd	AA	AA	AA	AA	AA	AB	AB	AA	AA	AA	AA	AA	AA	AA	AA	AA	AA	AA	AA	AA	AA	AA	AA	AA	AA	AA	AA	AA	AA	AA	AA	AA	AA	AA	AA	AA	AA	AA	AA	AA	AA	AA	AB
chr1D	161821501	161830500	9000	AA	AA	dd	AA	AA	AA	AA	AA	AA	AA	AA	AA	AA	Ad	AA	AA	AA	AA	AA	AA	AA	AA	AA	AA	AA	AA	AA	AA	AA	AA	AA	AA	AA	AA	AA	Ad	AA	Ad	Ad	AA	AA	Ad	AA	AA	AA	AA
chr1D	161963501	161974000	10500	AA	AA	dd	AA	Ad	AA	AA	AA	AA	AA	AA	AA	AA	AA	AA	AA	AA	AA	AA	AA	AA	AA	AB	AA	AA	AA	AA	AA	AA	AA	AB	AA	AA	AA	AA	Ad	Ad	Ad	Ad	Ad	AA	Ad	Ad	Ad	Ad	Ad
chr1D	162015501	162032000	16500	AA	AA	dd	AA	AA	AA	AA	AA	AA	AA	AA	AA	AA	AA	AA	AA	AA	AA	AA	AA	AA	AA	AA	AA	AA	AA	AA	AA	AA	AA	AA	AA	AA	AA	AA	AA	AA	AA	AA	AA	AA	AA	AA	Ad	AA	AA
chr1D	162085001	162092500	7500	Ad	AA	dd	AA	AA	AA	AA	AA	AA	AA	Ad	AA	AA	AA	AA	Ad	AA	Ad	AA	AA	AA	AA	AA	AA	AA	AA	AA	AA	AA	AA	AA	AA	AA	AA	AA	AA	Ad	Ad	Ad	AA	AA	Ad	Ad	Ad	Ad	Ad
chr1D	162360501	162365500	5000	AA	AA	Ad	AA	AA	AA	AA	AB	AA	AB	AB	AB	AA	AA	AA	AB	AA	AA	AA	AA	AA	AA	AB	AA	AB	AA	AB	AA	AA	AB	AB	AB	AA	AA	AA	AB	AA	AA	AA	AB	AA	AA	AB	AA	AA	AB
chr1D	162498501	162553000	54500	AA	AA	AA	AA	AA	AA	AA	AA	AA	AA	AA	AA	AA	AA	AA	AA	AA	AA	AA	AA	AA	AA	AA	AA	AA	AA	AA	AA	AA	AA	AA	AA	AA	AA	AA	AA	dd	AA	AA	AA	AA	AA	AA	AA	AA	AA
chr1D	162609001	162613500	4500	AA	AA	AA	AA	AA	AA	AA	AA	AA	AA	AA	AA	AA	AA	AA	AA	AA	AB	AA	AA	AA	AA	AA	AA	dd	AA	AA	AA	AA	AA	AA	AA	AA	AA	AA	AA	BB	AA	AA	AA	AA	AA	Ad	AA	AA	AA
chr1D	162805001	162816500	11500	AA	AA	dd	AA	AA	AA	AA	AA	AA	AA	AA	AA	AA	AA	AA	AA	AA	AA	AA	AA	AA	AA	AA	AA	AA	AA	AA	AA	AA	AA	AA	AA	AA	AA	AA	Ad	Ad	Ad	Ad	Ad	AA	Ad	Ad	Ad	Ad	Ad
chr1D	162987501	162997500	10000	AA	AA	dd	AA	AA	AA	AA	AA	AA	AA	AA	AA	AA	AA	AA	AA	AA	AA	AA	AA	AA	AA	AA	AA	AA	AA	AA	AA	AA	AA	AA	AA	AA	AA	AA	AA	AA	AA	AA	AA	AA	AA	AA	AA	AA	AA
chr1D	163197501	163202000	4500	Ad	Ad	dd	AA	AA	Ad	Ad	Ad	Ad	Ad	AA	Ad	AA	Ad	Ad	Ad	Ad	Ad	Ad	Ad	Ad	AA	Ad	Ad	Ad	Ad	Ad	Ad	AA	AA	Ad	Ad	Ad	AA	AA	Ad	Ad	Ad	Ad	Ad	Ad	Ad	Ad	Ad	Ad	Ad
chr1D	163334001	163353500	19500	AA	AA	dd	AA	AA	AA	AA	AA	AA	AA	AA	AA	AA	AA	AA	AA	AA	AA	AA	Ad	AA	Ad	AA	AA	AA	AA	AA	AA	AA	AA	AA	AA	AA	AA	AA	Ad	Ad	AA	Ad	Ad	AA	Ad	AA	Ad	Ad	Ad
chr1D	163526501	163532500	6000	AA	AA	dd	AA	AA	AA	AA	AA	AA	AA	AA	AA	AA	AA	AA	AA	AA	AA	AA	AA	AB	AA	AA	AA	AA	AA	AA	AA	AA	AA	AA	AA	AA	AA	AA	AA	AA	AA	AA	AA	AA	AA	AA	AA	AA	AB
chr1D	163814001	163821000	7000	Ad	Ad	dd	Ad	Ad	AA	Ad	Ad	AA	Ad	AA	AA	AA	Ad	Ad	AA	Ad	Ad	Ad	Ad	AA	Ad	AA	AA	AA	AA	Ad	Ad	AA	Ad	Ad	Ad	Ad	Ad	AA	AA	dd	Ad	AA	AA	AA	AA	AB	Ad	AA	AB
chr1D	163817501	163821500	4000	Ad	Ad	dd	Ad	Ad	Ad	Ad	Ad	AA	Ad	AA	Ad	Ad	Ad	AA	AA	Ad	Ad	AA	AA	AA	Ad	Ad	AA	AA	AA	Ad	Ad	AA	Ad	Ad	Ad	Ad	AA	AA	AA	dd	Ad	AA	AA	AA	AA	AB	Ad	AA	BB
chr1D	163825001	163831500	6500	Ad	Ad	AA	Ad	AA	Ad	AA	dd	AA	AA	Ad	AA	AA	Ad	AA	AA	Ad	Ad	AA	AA	AA	AA	Ad	AA	AA	AA	AA	AA	Ad	AA	AA	AA	Ad	Ad	AA	AB	AA	AA	AA	AA	AA	AA	BB	Ad	AA	AB
chr1D	164403501	164416000	12500	Ad	Ad	dd	Ad	Ad	Ad	Ad	Ad	Ad	Ad	Ad	Ad	Ad	Ad	Ad	Ad	Ad	Ad	Ad	Ad	Ad	Ad	Ad	Ad	Ad	Ad	Ad	Ad	Ad	Ad	Ad	Ad	Ad	Ad	Ad	Ad	Ad	Ad	Ad	Ad	Ad	Ad	Ad	Ad	Ad	Ad
chr1D	164550001	164563000	13000	Ad	Ad	dd	Ad	AA	Ad	Ad	AA	Ad	AA	Ad	AA	Ad	AA	Ad	AA	Ad	Ad	AA	Ad	AA	Ad	AA	Ad	Ad	Ad	Ad	AA	Ad	AA	Ad	AA	AA	AA	Ad	Ad	Ad	Ad	Ad	Ad	Ad	Ad	Ad	Ad	Ad	Ad
chr1D	164647501	164653000	5500	AA	AA	Ad	AA	AA	AA	AA	AA	AA	AA	AA	AA	AA	AA	AA	AA	AA	AA	AA	AA	AA	AA	AA	AA	AA	AA	AA	AA	AA	AA	AA	AA	AA	AA	AA	Ad	dd	AA	AA	AA	AA	AA	AA	AA	AA	AB
chr1D	164945001	164951000	6000	AA	AA	AA	AA	AA	AA	AA	AA	AA	AA	AA	AA	AA	AA	AA	AA	AA	AA	AA	AA	AA	AA	AA	AA	AA	AA	AA	AA	AA	AA	AA	AA	AA	Ad	AA	AA	dd	AA	AA	AA	AA	AA	AA	AA	AA	AA
chr1D	165086501	165101500	15000	AA	AA	dd	AA	AA	AA	AA	AA	AA	AA	AA	AA	AA	AA	AA	AA	AA	AA	AA	AA	AA	AA	AA	AA	AA	AA	AA	AA	AA	AA	AA	AA	AA	AA	AA	AA	AA	AA	AA	AA	AA	AA	AB	AA	AA	AB
chr1D	165170001	165174000	4000	AA	AA	dd	AA	AA	AA	AA	AA	AA	AA	AA	AA	AA	AA	AA	Ad	Ad	AA	AA	Ad	AA	AA	AA	AA	AA	AA	Ad	AA	AA	AA	Ad	AA	AA	AA	Ad	AA	AA	AB	AA	AA	AA	AA	AA	AA	AA	Ad
chr1D	165565001	165569500	4500	AA	AA	dd	AA	AA	AA	AA	AA	AB	AB	AA	AA	AA	AB	AA	AA	AA	AB	AA	AA	AA	AB	AA	AA	AA	AA	AA	AA	AA	AA	AA	AA	AA	AB	AA	AA	AA	AA	AA	AA	AA	AA	AA	AA	AA	AA
chr1D	165573501	165580000	6500	AA	AA	dd	AA	AA	AA	AA	AA	AA	AA	AA	AA	AA	AA	AA	AA	AA	AA	AA	AA	AA	AA	AA	AA	AA	AA	AA	Ad	AA	AA	AA	AA	AA	AA	AA	AA	AA	Ad	Ad	AA	AA	Ad	Ad	Ad	Ad	Ad
chr1D	165858001	165873500	15500	AA	AA	dd	AA	AA	AA	AA	AA	AA	AA	AA	AA	AA	AA	AA	AA	AA	AA	AA	AA	AA	AA	AA	AA	AA	AA	AA	AA	AA	AA	AA	AA	AA	AA	AA	Ad	AA	AA	AA	AA	AA	AA	AA	AA	AA	AA
chr1D	166015001	166021500	6500	AA	AB	dd	AA	AA	AA	AA	AA	AA	AA	AA	AA	AA	AA	AA	AA	AA	AA	AA	AA	AA	AA	AA	AA	AA	AA	AA	AB	AA	AA	AA	AA	AA	AA	AA	Ad	Ad	AA	Ad	Ad	AA	Ad	AA	Ad	Ad	AA
chr1D	166129001	166138500	9500	AA	AA	dd	AA	AA	AA	AA	AA	AA	AA	AA	AA	AA	AA	AA	AA	AA	AA	AA	AA	AA	AA	AA	AA	AA	AB	AA	AA	AA	AA	AA	AA	AA	AA	AA	AA	Ad	AA	AA	AA	AA	AA	AA	AA	AA	AA
chr1D	166177001	166181500	4500	AA	Ad	dd	AA	AA	AA	AB	AA	Ad	Ad	AA	AA	AA	Ad	AA	AA	AA	Ad	AA	AA	AA	AA	AA	Ad	AA	AA	AA	AA	AA	AA	AA	AA	AA	AA	Ad	AA	AA	AB	AA	AA	AA	AA	AA	Ad	Ad	AA
chr1D	166321001	166336000	15000	AA	AA	AA	AA	AA	AA	AA	AA	AA	AA	AA	AA	AA	AA	AA	AA	AA	AA	AA	AA	AA	AA	AA	AA	AA	AA	AA	AA	AA	AA	AA	AA	AA	AA	AA	dd	AA	AA	AA	AA	AA	AA	AA	AA	AA	AA
chr1D	166382001	166394500	12500	AA	AA	dd	AA	AA	Ad	AA	AA	AA	AA	AA	AA	AA	AA	AA	AA	AA	AA	AA	AA	AA	AA	AA	AA	AA	AA	AA	AA	AA	AA	AA	AA	AA	AA	AA	Ad	Ad	AA	AA	Ad	AA	Ad	AA	Ad	Ad	AA
chr1D	166555501	168670500	2115000	AA	dd	AA	AA	AA	AA	AA	AA	AA	AA	AA	AA	AA	AA	dd	AA	AA	AA	AA	AA	AA	AA	AA	AA	AA	AA	AA	AA	AA	AA	AA	AA	AA	AA	AA	AA	AA	AA	dd	AA	AA	AA	AA	AA	AA	AA
chr1D	168683501	168696500	13000	AA	AA	dd	AA	Ad	AA	AA	Ad	Ad	AA	AA	AA	AA	AA	AA	AA	AA	AA	AA	Ad	AA	Ad	AA	Ad	AA	AA	Ad	AA	AA	AA	AA	AA	AA	AA	Ad	Ad	dd	Ad	Ad	Ad	AA	Ad	AA	Ad	Ad	Ad
chr1D	168760501	168794500	34000	AA	AA	dd	AA	AA	AA	AA	AA	AA	AA	AA	AA	AA	AA	AA	AA	AA	AA	AA	AA	AA	AA	AA	AA	AA	AA	AA	AA	AA	AA	AA	AA	AA	AA	AA	Ad	AA	AA	AA	Ad	AA	AA	AA	AA	AA	AA
chr1D	169099001	169110500	11500	AA	AA	dd	AA	AA	AA	AA	AA	AA	AA	AA	AA	AA	AA	AA	AA	AA	AA	AA	AA	AA	AA	AA	AA	AA	AA	AA	AA	AA	AA	AA	AA	AA	AA	AA	Ad	Ad	AA	Ad	Ad	AA	Ad	AA	AA	Ad	AA
chr1D	175965501	175973000	7500	AA	AA	dd	AA	AA	AA	AA	AB	AA	AA	AA	AA	AB	AA	AA	AA	AA	AB	AA	AA	AB	AA	AA	AA	AA	AB	AA	AA	AA	AA	AA	AA	AA	AA	AA	AA	AA	AA	Ad	Ad	AA	Ad	AA	AA	AA	AA
chr1D	176624001	176629500	5500	AA	AA	Ad	AA	Ad	AA	AA	AA	AA	AA	AA	AA	Ad	AA	AA	AA	AA	AA	AA	AA	Ad	AA	AA	AA	AA	AA	AA	AA	AA	AA	AA	AA	AA	AA	AA	AA	AA	Ad	AA	AA	AA	AA	Ad	AA	AA	AA
chr1D	176670501	176674500	4000	AA	AA	dd	AA	AA	AA	AA	AA	AA	Ad	AA	Ad	AA	AA	AA	Ad	AA	AA	AA	AA	AA	AA	AA	AA	AA	AA	AA	AA	AA	AA	AA	AA	AA	AA	AA	AA	dd	Ad	AA	AA	AA	Ad	Ad	AA	Ad	Ad
chr1D	176905001	176912000	7000	AA	AA	dd	Ad	AA	Ad	AA	Ad	AA	AA	Ad	AA	AA	AA	AA	Ad	AA	AA	AA	Ad	Ad	AA	AA	AA	AA	AA	AA	AA	AA	AA	AA	AA	AA	Ad	AA	AA	Ad	AA	Ad	Ad	AA	AA	Ad	AA	AA	AA
chr1D	176972001	176984000	12000	AA	AA	dd	Ad	AA	AA	AA	AA	Ad	AA	AA	AA	AA	Ad	AA	AA	AA	AA	AA	AA	AA	AA	Ad	AA	AA	AA	Ad	Ad	AA	Ad	AA	AA	Ad	AA	AA	Ad	Ad	Ad	Ad	Ad	Ad	Ad	Ad	Ad	Ad	Ad
chr1D	176996501	177001500	5000	AA	AA	AA	dd	AA	AA	AA	AA	AA	AA	AA	AA	AA	AA	AA	AA	AA	AA	AA	AA	AA	AA	AA	AA	AA	AA	AA	AA	AA	AA	AA	AA	AA	AA	AA	AB	AA	AA	AA	AA	AA	AA	AA	AA	dd	dd
chr1D	177144001	177159000	15000	dd	dd	dd	dd	dd	dd	dd	dd	dd	dd	dd	dd	dd	dd	dd	dd	dd	dd	dd	dd	dd	dd	dd	dd	dd	dd	dd	dd	dd	dd	dd	dd	dd	dd	dd	dd	dd	dd	dd	dd	dd	dd	dd	dd	dd	dd
chr1D	177443501	177455000	11500	AA	AA	dd	AA	AA	AA	AA	AA	AA	AA	AA	AA	AA	AA	AA	AA	AA	AA	AA	AA	AA	AA	AA	AA	AA	AA	AA	AA	AA	AA	AA	AA	AA	AA	AA	AB	AA	AA	AA	AA	AA	AA	AA	AA	AA	AA
chr1D	177621001	177628500	7500	AA	AA	dd	AA	AA	AA	AA	AA	AA	AA	AA	AA	AA	AA	AA	AA	AA	AA	AA	AA	AA	AA	AA	AA	AA	AA	AA	AA	AA	AA	Ad	AA	AA	AA	AA	AA	AA	AA	AA	AA	AA	AA	AB	AA	AA	AB
chr1D	177668001	177677500	9500	AA	AA	dd	AA	AA	AA	AA	AA	AA	AA	AA	AA	AA	AA	AA	AA	Ad	AA	AA	Ad	AA	Ad	AA	AA	AA	AA	AA	AA	AA	AA	AA	AA	AA	AA	AA	Ad	Ad	Ad	Ad	Ad	Ad	Ad	Ad	Ad	Ad	Ad
chr1D	177702501	177742000	39500	AA	AA	dd	AA	AA	AA	AA	AA	AA	AA	AA	AA	AA	AA	AA	AA	AA	AA	AA	AA	AA	AA	AA	AA	AA	AA	AA	AA	AA	AA	AA	AA	AA	AA	AA	AA	AA	AA	AA	AA	AA	AA	AA	AA	AA	AA
chr1D	177840001	177846000	6000	AA	AA	AA	AA	Ad	AA	AA	AA	AA	AA	AA	AA	AA	dd	AA	AA	Ad	AA	AA	AA	AA	dd	dd	AA	AA	AA	AA	AA	AA	dd	Ad	AA	AA	AA	AA	AA	AA	AA	AA	AA	AA	AA	AA	AA	AA	AA
chr1D	177898501	177912000	13500	AA	AA	dd	AA	AA	AA	AA	AA	AA	AA	AA	AA	AA	AA	AA	AA	AA	AA	AA	AA	AA	AA	AA	AA	AA	AA	AA	AA	AA	AA	AA	AA	AA	AA	AA	AA	AA	AA	AA	AA	AA	AA	AA	AA	AA	AA
chr1D	178052501	178068500	16000	AA	AA	dd	AA	AA	AA	AA	AA	AA	AA	AA	AA	AA	AA	AA	AA	AA	AA	AA	AA	AA	AA	AA	AA	AA	AA	AA	AB	AA	AA	AA	AA	AA	AA	AA	AA	AA	AB	AA	Ad	AA	AA	AA	AA	AA	AA
chr1D	178174501	178182000	7500	AA	AA	dd	Ad	AA	AA	AA	AA	AA	AA	AA	AA	AA	AB	AA	AA	AA	AA	AA	AA	AA	AA	AA	AA	AA	AA	AA	AA	AA	AA	AA	AA	AA	AA	AA	Ad	AA	AA	AA	Ad	AA	AA	AA	AA	Ad	AA
chr1D	178391001	178419500	28500	Ad	Ad	dd	Ad	Ad	Ad	Ad	Ad	Ad	Ad	AA	Ad	Ad	Ad	Ad	AA	Ad	Ad	AA	Ad	Ad	Ad	AA	Ad	Ad	Ad	AA	Ad	Ad	Ad	Ad	Ad	Ad	AA	AA	Ad	Ad	Ad	Ad	Ad	AA	Ad	Ad	Ad	Ad	Ad
chr1D	178552001	178563000	11000	Ad	Ad	dd	Ad	Ad	Ad	Ad	Ad	Ad	Ad	dd	Ad	Ad	Ad	Ad	dd	Ad	Ad	Ad	Ad	Ad	Ad	Ad	Ad	Ad	Ad	Ad	Ad	dd	Ad	Ad	Ad	Ad	Ad	Ad	dd	dd	dd	dd	dd	Ad	dd	dd	dd	dd	dd
chr1D	178565501	178582500	17000	AA	AA	dd	AA	AA	AA	AA	AA	AA	AA	AA	AA	AA	AA	AA	AA	AA	AA	AA	AA	AA	AA	AA	AA	AA	AA	AA	AA	AA	AA	AA	AA	AA	AA	AA	AB	AA	AA	AA	AA	AA	AA	AA	AA	AA	AA
chr1D	178864501	178874500	10000	AA	AA	dd	AA	AA	AA	AA	AA	AA	AA	AA	Ad	AA	Ad	AA	AA	AA	AA	AA	AA	AA	AA	AA	AA	AA	AA	AA	AA	AA	AA	AA	AA	AA	AA	AA	AA	AA	AA	Ad	Ad	AA	Ad	Ad	AA	Ad	AA
chr1D	178882501	178887000	4500	AA	AA	dd	AA	AA	AA	AA	AA	AA	AA	AA	Ad	AA	AA	AA	AA	AA	AB	Ad	AA	AA	AA	AA	AA	AA	AA	AA	AB	AB	AB	AA	AA	AA	AB	AA	AA	AA	AA	AA	AA	AA	AA	Ad	AA	AA	Ad
chr1D	178948501	178957500	9000	AA	AA	AA	AA	AA	AA	AA	AA	AA	AA	AA	AA	AA	AA	AA	AA	AA	AA	AA	AA	AA	AA	AA	AA	AA	AA	AA	AA	AA	AA	AA	AA	AA	AA	AA	Ad	AA	AA	AA	Ad	AA	AA	AA	AA	AA	AA
chr1D	178985501	179003500	18000	AA	AA	dd	AA	AA	AA	AA	AA	AA	AA	AA	AA	AA	AA	AA	AA	AA	AA	AA	AA	AA	AA	AA	AA	AA	AA	AA	AA	AA	AA	AA	AA	AA	AA	AA	AA	AA	AA	AA	AA	AA	AA	AA	AA	AA	Ad
chr1D	179130001	179134000	4000	Ad	AA	dd	Ad	AA	Ad	Ad	Ad	AA	AB	Ad	AA	AA	AA	AA	AA	AA	Ad	Ad	Ad	Ad	Ad	Ad	AA	Ad	AA	AA	Ad	AA	AA	AA	Ad	Ad	AA	AA	AA	dd	Ad	Ad	AA	Ad	Ad	Ad	Ad	Ad	Ad
chr1D	179289501	179296000	6500	dd	dd	dd	dd	dd	dd	dd	dd	dd	dd	dd	dd	dd	dd	dd	dd	dd	dd	dd	dd	dd	dd	dd	dd	dd	dd	dd	dd	dd	dd	dd	dd	dd	dd	dd	dd	dd	dd	dd	dd	dd	dd	dd	dd	dd	dd
chr1D	179303001	179307000	4000	Ad	Ad	dd	dd	Ad	Ad	dd	Ad	Ad	Ad	Ad	dd	Ad	dd	Ad	Ad	Ad	Ad	Ad	Ad	Ad	Ad	Ad	Ad	dd	Ad	Ad	AA	Ad	Ad	dd	dd	Ad	dd	Ad	dd	dd	dd	dd	dd	Ad	dd	dd	Ad	dd	dd
chr1D	179328001	179334000	6000	AA	AA	dd	AA	AA	AA	AA	AA	AA	AA	AA	AA	AA	AA	AA	AA	AA	AA	AA	AA	AA	AA	AA	AA	AA	AA	AA	AA	AA	AA	AA	AA	AA	AA	AA	AA	AA	BB	AA	AA	AA	AA	AA	AA	AA	AA
chr1D	179602001	179616500	14500	AA	AA	AA	AA	AA	AA	AA	AA	AA	AA	AA	AA	AA	AA	AA	AA	AA	AA	AA	AA	AA	AA	AA	AA	AA	AA	AA	AA	AA	AA	AA	AA	AA	AA	AA	AA	dd	AA	AA	AB	AA	AA	AA	AA	AA	AA
chr1D	179665001	179677000	12000	AA	Ad	dd	AA	Ad	AA	AA	AA	AA	AA	AA	Ad	Ad	Ad	AA	Ad	AA	AA	AA	Ad	Ad	AA	AA	AA	AA	AA	AA	AA	AA	AA	AA	AA	AA	AA	AA	Ad	Ad	Ad	Ad	Ad	AA	Ad	Ad	Ad	Ad	Ad
chr1D	179694501	179701500	7000	AA	AA	dd	AA	AA	AA	AA	AA	AA	AA	AA	AA	AA	AA	AA	AA	AA	AA	AA	AA	AA	AA	AA	AA	AA	AA	AA	AA	AA	AA	AA	AA	AA	AB	AA	AA	AA	Ad	AA	Ad	AA	AA	Ad	Ad	Ad	AA
chr1D	179744501	179755500	11000	AA	AA	AA	AA	AA	AA	AA	AA	AA	AA	AA	AA	AA	AB	AA	AA	AA	AA	AA	AA	AA	AA	AA	AA	AA	AA	AA	AA	AA	AA	AA	AA	AA	AA	AA	AA	dd	AA	AA	AA	AA	AA	AA	AA	AA	AA
chr1D	179769001	179776500	7500	AA	AA	dd	AA	AA	AA	AA	AA	AA	AA	AA	AA	AA	AA	AA	AA	AA	AA	AA	AA	AA	AA	AA	AA	AA	AA	AA	AA	AA	AA	AA	AA	AA	AA	AA	AA	AA	AA	AA	AA	AA	AA	AA	AA	AA	AA
chr1D	179774001	179782500	8500	AA	AA	AA	AA	AA	AA	AA	AA	AA	AA	dd	AA	AA	AA	AA	AA	AA	AA	AA	AA	AA	AA	AA	AA	AA	AA	AA	AA	AA	AA	AA	AA	AA	AA	AA	AB	AA	AA	AA	AA	AA	AA	AA	AA	AA	AA
chr1D	180218501	180222500	4000	Ad	dd	dd	dd	dd	dd	dd	Ad	Ad	dd	Ad	dd	Ad	Ad	dd	dd	Ad	Ad	dd	dd	dd	dd	dd	dd	dd	dd	dd	dd	dd	dd	dd	dd	dd	Ad	dd	dd	dd	dd	dd	dd	dd	dd	dd	dd	dd	dd
chr1D	180308501	180313000	4500	Ad	Ad	dd	Ad	Ad	Ad	Ad	Ad	Ad	Ad	Ad	Ad	Ad	Ad	Ad	dd	Ad	Ad	dd	Ad	Ad	Ad	Ad	Ad	Ad	Ad	dd	Ad	dd	Ad	Ad	Ad	Ad	Ad	dd	dd	dd	Ad	Ad	dd	Ad	dd	dd	dd	dd	dd
chr1D	180339001	180343500	4500	AA	AA	dd	AA	AA	AA	AA	AA	AA	AA	AA	AA	AA	AA	Ad	AA	AA	AA	AA	AA	AA	AA	AA	AA	AA	AA	AA	AA	AA	AA	AA	AA	AA	AA	AA	AA	Ad	Ad	AA	AA	AA	AA	AA	AA	Ad	AA
chr1D	180667001	180675500	8500	AA	AA	dd	AA	AA	AA	AA	AA	dd	AA	dd	AA	AA	AA	AA	Ad	AA	dd	dd	AA	AA	AA	AA	AA	AA	AA	AA	AA	AA	AA	AA	AA	dd	AA	AA	dd	AA	Ad	Ad	AA	AA	AA	AA	dd	Ad	Ad
chr1D	181111001	181123500	12500	AA	AA	dd	AA	AA	AA	AA	AA	AA	AA	AA	AA	AA	AA	AA	AA	AA	AA	AA	AA	AA	AA	AA	AA	AA	AA	AA	AA	AA	AA	AA	AA	AA	AA	AA	Ad	dd	AA	Ad	Ad	AA	Ad	AA	Ad	Ad	AA
chr1D	181132501	181138000	5500	AA	AA	AA	Ad	AA	AA	dd	AA	AA	AA	AA	AA	AA	AA	AA	AA	AA	Ad	AA	AA	AA	AA	AA	AA	AA	AA	AA	AA	AA	AA	AA	AA	AA	AA	AA	AA	AA	AA	AA	AA	AA	AA	AA	AA	AA	AA
chr1D	181168501	181175500	7000	AB	AB	dd	AB	AB	AA	AB	AB	AA	AB	AB	AB	AB	AB	AA	AA	AB	AA	AA	AA	AB	AB	AB	AB	AA	AB	AA	AA	AA	AA	AB	AB	AA	AA	AB	AB	Ad	AA	AA	AA	AA	AA	AB	AB	AA	AB
chr1D	181189501	181194500	5000	AA	AB	dd	AA	AB	AA	AA	AA	AA	AB	AA	AA	AA	AB	AA	AA	AA	AA	AA	AA	AA	AA	AA	AB	AA	AA	AA	AA	AA	AA	AA	AA	AA	AB	AA	AB	AA	AA	AA	AA	AA	AA	AA	AA	AA	AA
chr1D	181441501	181449500	8000	Ad	Ad	dd	AA	AA	AA	AA	Ad	AA	Ad	Ad	Ad	Ad	Ad	Ad	Ad	Ad	Ad	Ad	Ad	Ad	Ad	Ad	Ad	AA	Ad	Ad	Ad	Ad	Ad	Ad	Ad	Ad	Ad	Ad	Ad	dd	Ad	Ad	Ad	Ad	Ad	Ad	Ad	Ad	Ad
chr1D	181600501	181607500	7000	Ad	Ad	dd	Ad	Ad	Ad	Ad	Ad	Ad	Ad	Ad	Ad	Ad	Ad	Ad	Ad	Ad	Ad	Ad	Ad	Ad	Ad	Ad	Ad	Ad	Ad	Ad	Ad	Ad	Ad	Ad	Ad	Ad	Ad	Ad	Ad	dd	dd	Ad	Ad	Ad	dd	Ad	dd	Ad	Ad
chr1D	181733501	181742500	9000	AA	AA	dd	AA	AA	AA	AA	AA	AA	AA	AA	AA	AA	AA	AA	AA	AA	AA	AA	AA	AA	AA	AA	AA	AA	AA	AA	AA	AA	AA	AA	AA	AA	AA	AA	AA	AA	AA	AA	AA	AA	AA	AA	AA	AA	AA
chr1D	181801001	181810500	9500	AA	AA	AA	AA	AA	AA	AA	AA	AA	AA	AA	AA	AA	AA	AA	AA	AA	AA	AA	AA	dd	AA	AA	AA	AA	AA	AA	AA	AA	AA	AA	AA	AA	AA	AA	AA	AA	AA	AA	AA	AA	AA	AA	AA	AA	AA
chr1D	182161001	182170500	9500	Ad	Ad	dd	Ad	Ad	Ad	Ad	Ad	Ad	Ad	Ad	AA	Ad	Ad	Ad	Ad	Ad	AA	Ad	Ad	Ad	Ad	Ad	Ad	Ad	AA	Ad	Ad	Ad	Ad	Ad	Ad	Ad	Ad	Ad	Ad	Ad	Ad	Ad	Ad	Ad	Ad	Ad	Ad	Ad	Ad
chr1D	182400001	182405000	5000	AA	AA	dd	AA	AA	AA	AA	AA	AB	AA	AA	AA	AA	AA	AA	AB	AA	AA	AA	AA	AB	AA	AA	AA	AA	AA	AA	AB	AA	AB	AA	AA	AA	AA	AA	Ad	AA	AB	AA	AA	AA	AA	AA	AA	AA	AA
chr1D	182901501	182905500	4000	AA	AA	dd	Ad	AA	AA	AA	AA	AA	AA	Ad	AA	AA	AA	Ad	AA	AA	AA	AA	AA	AA	AA	AA	AA	AA	AA	AA	AA	AA	AA	AA	AA	AA	AA	AA	AB	AA	AB	AA	AA	AA	AA	AA	AA	AA	AA
chr1D	183176001	183180000	4000	AA	AA	dd	AA	AA	AA	AA	AA	AA	AA	AA	AA	Ad	AA	AA	AA	AA	AA	AA	AA	AA	AA	AA	AA	AA	AA	AA	AA	AA	AA	AA	AA	AA	AA	AA	Ad	Ad	AA	AA	Ad	AA	AA	AA	AA	AA	AA
chr1D	183438001	183442500	4500	AA	AA	dd	AA	AA	Ad	Ad	AA	AA	Ad	AA	AA	AA	AA	AA	AA	AA	AA	Ad	Ad	AA	AA	AA	Ad	AA	AA	AA	AA	AA	AA	AA	AA	Ad	AA	AA	Ad	Ad	Ad	Ad	Ad	AA	Ad	AA	Ad	Ad	AA
chr1D	183543001	183547500	4500	AB	AB	dd	AB	AA	AB	AB	BB	AB	BB	AB	AA	AA	AB	AB	BB	BB	BB	BB	BB	BB	AB	AB	BB	AB	BB	AB	AB	AA	AB	AB	AB	AB	AB	AB	BB	AB	AB	BB	BB	AB	AB	BC	AB	BB	BC
chr1D	183587501	183594500	7000	AA	AA	dd	AA	AA	AA	AA	AA	AA	AA	AA	AA	AA	AA	AA	AA	AA	AA	AA	AA	AA	AA	AB	AA	AA	AA	AA	AA	AA	AA	AA	AA	AA	AA	AA	AA	AA	AA	AA	AA	AA	AA	AA	AA	AA	AA
chr1D	184053501	184077000	23500	AA	AA	AA	AA	AA	AA	AA	AA	AA	AA	AA	AA	AA	AA	AA	AA	AA	AA	AA	AA	AA	AA	AA	AA	AA	AA	AA	AA	AA	AA	AA	AA	AA	AA	AA	AA	dd	AA	AA	AA	AA	AA	AA	AA	AA	AA
chr1D	184209501	184213500	4000	AB	AA	dd	AA	AA	AA	AB	AB	AA	AA	AA	AA	AA	AB	AA	AA	AA	AA	AA	AA	AA	AA	AA	AA	AA	AA	AA	AA	AA	AA	AA	AA	AA	AA	AA	AB	AA	AA	AA	AA	AA	AA	AA	AA	AA	AA
chr1D	184234001	184240000	6000	AA	AA	dd	AA	AA	AA	AA	AA	AA	AA	AA	AA	AA	AA	AA	AA	AA	AA	AA	AA	AA	AA	AA	AA	AA	AA	AA	AA	AA	AA	AA	AA	AA	AA	AA	AA	Ad	Ad	Ad	Ad	AA	AA	Ad	Ad	Ad	Ad
chr1D	184473501	184478000	4500	AA	Ad	Ad	Ad	Ad	Ad	Ad	Ad	Ad	AA	Ad	Ad	Ad	Ad	Ad	AA	AA	Ad	AA	Ad	dd	Ad	AA	AA	Ad	Ad	Ad	AA	Ad	AA	Ad	Ad	Ad	AA	AA	AA	AA	AB	Ad	AA	AA	AA	AA	AA	AA	AA
chr1D	184487001	184497000	10000	AA	AA	AA	AA	AA	AA	AA	AA	AA	AA	AA	AA	AA	AA	AA	AA	AA	AA	AA	AA	AA	AA	AA	AA	AA	AA	AA	AA	AA	AA	AA	AA	AA	AA	AA	Ad	dd	AA	AA	AA	AA	AA	AA	AA	AA	AA
chr1D	184622001	184626000	4000	dd	Ad	dd	Ad	dd	Ad	dd	Ad	dd	Ad	Ad	Ad	Ad	dd	Ad	Ad	dd	Ad	Ad	Ad	Ad	dd	Ad	Ad	Ad	Ad	dd	Ad	Ad	dd	Ad	dd	Ad	Ad	Ad	Ad	dd	Ad	Ad	Ad	Ad	Ad	dd	dd	Ad	dd
chr1D	184861001	184867500	6500	AA	AA	dd	AA	AA	AA	AA	AA	AA	AA	AA	AA	AA	AA	AA	AA	AA	AA	AA	AA	AB	AA	AA	AA	AA	AA	AA	AB	AA	AA	AA	AA	AA	AA	AA	Ad	AA	AA	AA	Ad	AA	AA	AA	AA	AA	AA
chr1D	184891501	184914500	23000	AA	AA	AA	AA	dd	AA	AA	AA	AA	AA	AA	AA	AA	AA	AA	AA	AA	AA	AA	AA	AA	AA	AA	AA	AA	AA	AA	AA	AA	AA	AA	AA	AA	AA	AA	AB	AA	AA	AA	AA	AA	AA	AA	AA	AA	AA
chr1D	184911501	184917000	5500	AA	AA	dd	AA	dd	AA	AA	AA	AA	Ad	AA	AA	AA	AA	AA	AB	AA	AA	AA	AA	AA	AA	AB	AA	AB	AA	AA	AA	AA	AA	AA	AA	AA	AA	AA	AB	AA	AB	AA	AA	AA	AA	AA	AA	AA	AA
chr1D	184958501	184963500	5000	Ad	dd	dd	Ad	Ad	Ad	Ad	Ad	Ad	Ad	Ad	Ad	Ad	Ad	dd	Ad	Ad	Ad	Ad	Ad	Ad	Ad	Ad	Ad	Ad	Ad	Ad	Ad	Ad	Ad	Ad	Ad	Ad	Ad	Ad	dd	dd	dd	dd	dd	Ad	dd	Ad	dd	dd	Ad
chr1D	184963501	184968500	5000	dd	dd	dd	dd	dd	dd	dd	dd	dd	dd	dd	dd	dd	dd	dd	dd	dd	dd	dd	dd	dd	dd	dd	dd	dd	dd	dd	dd	dd	dd	dd	dd	dd	dd	dd	dd	dd	dd	dd	dd	dd	dd	dd	dd	dd	dd
chr1D	185130501	185138000	7500	dd	dd	dd	dd	dd	dd	dd	dd	dd	dd	dd	dd	dd	dd	dd	dd	dd	dd	dd	dd	dd	dd	dd	dd	dd	dd	dd	dd	dd	dd	dd	dd	dd	dd	dd	dd	dd	dd	dd	dd	dd	dd	dd	dd	dd	dd
chr1D	185333001	185342500	9500	AA	AA	dd	AA	AA	AA	AA	AA	AA	AA	AA	AA	AA	AA	AA	AA	Ad	AA	AA	AA	AA	Ad	AA	AA	AA	AA	AA	AA	Ad	AA	AA	AA	Ad	Ad	AA	Ad	AA	AA	Ad	Ad	AA	AA	AA	Ad	Ad	AA
chr1D	185508501	185519000	10500	AA	AA	AA	AA	AA	AA	Ad	AA	AA	AA	AA	AA	AA	AA	AA	AA	AA	AA	AA	AA	AA	AA	AA	AA	AA	AA	AA	AA	AA	AA	AA	AA	AA	AA	AA	AA	dd	AA	AA	AA	AA	AA	AA	AA	AA	AA
chr1D	185668001	185677000	9000	AA	AA	dd	AA	AA	AA	AA	AA	AA	AA	AA	AA	AA	AA	AA	AA	AA	AA	AA	AA	AA	AA	AA	AA	AA	AA	AA	AA	AA	AA	AA	AA	AA	AA	AA	AA	AA	AA	AA	AA	AA	AA	AA	AA	AA	AA
chr1D	185744001	185751500	7500	AA	AA	Ad	AA	AA	AA	AA	AA	AA	AA	AA	AA	AB	AB	AA	AA	AA	AB	AA	AA	AA	AA	AB	AA	AA	AA	AA	Ad	AA	AA	AA	AA	AA	AB	AA	AA	AA	Ad	AA	AA	AA	AA	AA	Ad	AA	AA
chr1D	185757501	185763000	5500	AA	AA	Ad	AA	AB	AA	AA	AA	AA	AA	AA	AA	AA	AA	AA	AA	AA	AA	AA	AA	AA	AA	AA	AA	AA	AA	AA	AA	AA	AA	AA	AA	AB	AA	AA	AA	AA	AA	AA	AA	AA	AA	AB	AA	AA	AA
chr1D	185773001	185777000	4000	AB	AA	Ad	AB	AA	AA	AA	AB	AA	AA	AA	AA	AB	AA	AA	AA	AA	AA	AA	AA	AA	AA	AB	AA	AA	AB	AA	AA	AB	AA	AB	AA	AA	AA	AA	AA	AA	Ad	AA	AA	AA	AA	AA	Ad	AA	Ad
chr1D	185879001	185899500	20500	AA	AA	dd	AA	AA	AA	AA	AA	AA	AA	AA	AA	AA	AA	AA	AA	AA	AA	AA	AA	AA	AA	AA	AA	AA	AA	AA	AA	AA	AA	AA	AA	AA	AA	AA	AA	AA	AA	AA	AA	AA	AA	AA	AA	AA	AA
chr1D	185942501	185950500	8000	Ad	Ad	dd	Ad	Ad	Ad	Ad	Ad	Ad	Ad	Ad	Ad	Ad	Ad	Ad	Ad	Ad	Ad	Ad	Ad	Ad	Ad	Ad	Ad	Ad	Ad	Ad	Ad	Ad	Ad	Ad	Ad	Ad	Ad	Ad	Ad	dd	dd	dd	Ad	Ad	Ad	Ad	Ad	Ad	Ad
chr1D	186261501	186265500	4000	AA	AA	AA	AA	AA	AA	AA	AA	AA	AA	AA	AA	AA	AA	AA	AA	AA	AA	AA	AA	AA	AA	AA	AA	AA	AA	AA	AA	AA	AA	AA	AA	AA	AA	AA	AA	AA	AA	AA	AA	AA	AA	AA	AA	AA	AA
chr1D	186467501	186475500	8000	AA	AB	dd	AA	AA	AB	AA	AA	AA	AB	AA	AA	AA	AA	AA	AA	AA	AA	AA	AB	AA	AA	AA	AA	AA	AA	AA	AB	AA	AA	AB	AA	AA	AA	AA	Ad	AA	AA	AA	Ad	AA	AA	AA	AA	Ad	AA
chr1D	186832001	186837000	5000	AA	AA	dd	AB	AA	AA	AA	AA	AA	AA	AA	AA	AA	AA	AA	AA	AA	AA	AB	AA	AA	AA	AA	AA	AA	AA	AA	Ad	AA	AA	AA	AB	AB	AA	AA	AB	AA	AB	AA	AA	AA	AA	AA	AA	AA	AA
chr1D	186896501	186902500	6000	AA	AA	dd	AA	AA	AA	AA	AA	AA	AA	AA	AA	AA	AA	AA	AA	AA	AA	Ad	AA	AA	AA	AA	AA	AA	AA	AA	AA	AA	AA	AA	AA	AA	AA	AA	AA	Ad	Ad	Ad	AA	AA	AA	AA	AA	Ad	Ad
chr1D	186919001	186931000	12000	AA	AA	dd	AA	AA	AA	Ad	AA	AA	AA	AA	AA	AA	AA	AA	AA	AA	AA	AA	AA	AA	Ad	AA	AA	AA	Ad	AA	AA	AA	AA	Ad	AA	Ad	AA	AA	Ad	dd	Ad	Ad	Ad	AA	Ad	AA	Ad	Ad	Ad
chr1D	186937501	186950500	13000	AA	AA	AA	AA	AA	AA	AA	AA	AA	AA	AA	AA	AA	AA	AA	AA	AA	AA	AA	AA	AA	AA	AA	AA	AA	AA	AA	AB	AA	AA	AA	AA	AA	AA	AA	Ad	dd	AA	AA	AA	AA	AA	AA	AA	AA	AA
chr1D	186952501	186960000	7500	AA	AA	dd	AA	AA	AA	AA	AA	AA	AA	AA	AA	AA	AA	AA	AA	AA	AA	AA	AA	AA	AB	AB	Ad	AA	AA	AA	AB	AB	AA	AA	AB	AA	AB	AA	Ad	Ad	AA	Ad	Ad	AA	Ad	Ad	Ad	Ad	AA
chr1D	186968001	186973000	5000	AA	AA	dd	AA	AA	AB	AA	AA	AA	AA	AA	AA	AA	AB	AB	AA	AA	AB	AB	AB	AA	AB	AB	AA	AA	AA	AA	AB	AB	AB	AB	AB	AA	AB	AA	AA	AA	AB	AA	AA	AA	AA	AA	AA	AA	AA
chr1D	187024001	187028000	4000	AA	AA	dd	AA	AA	AA	AA	AA	AA	AA	AA	AA	AA	AA	AA	AA	AA	AA	AA	AA	AA	AA	AA	AA	AA	AA	AA	AA	AA	AA	AA	AA	AA	AA	AA	AA	AA	AB	AA	AA	AA	AA	AA	AA	AA	AA
chr1D	187267501	187272000	4500	AA	AA	dd	AB	AA	AA	AA	AA	AA	AA	AA	AA	AA	AA	AA	AA	AA	AA	AA	AA	AA	AA	AA	AA	AA	AA	AA	AB	AA	AA	AB	AA	AA	AA	AA	Ad	Ad	AB	AA	Ad	AA	Ad	AA	AA	AA	AA
chr1D	187298001	187302000	4000	AA	AA	dd	AA	AA	AA	AA	AB	AA	AA	AA	AA	AA	AA	AA	AA	AA	AA	AA	Ad	AA	AA	AA	Ad	AA	AA	AA	AA	AA	AA	AA	AA	AA	AA	AA	AA	AA	AA	AA	AA	AA	AA	AA	AA	AA	AA
chr1D	187426501	187433000	6500	AA	AA	dd	AA	AA	AA	AA	AA	AA	AA	AA	AA	AA	AA	AA	AA	AA	AA	AA	AA	AA	AA	AA	AA	AA	AA	AA	AA	AA	AA	AA	AA	AA	AA	AA	AA	Ad	Ad	Ad	AA	AA	Ad	AA	AA	AA	Ad
chr1D	187515001	187574000	59000	AA	AA	AA	AA	AA	AA	AA	AA	AA	AA	AA	AA	AA	AA	AA	AA	AA	AA	AA	AA	AA	AA	AA	AA	AA	AA	AA	AA	AA	AA	AA	AA	AA	AA	AA	AA	dd	AA	AA	AA	AA	AA	AA	AA	AA	AA
chr1D	187871501	187888000	16500	AA	AA	dd	AA	AA	AA	AA	AA	AA	AA	AA	AA	AA	AA	AA	AA	AA	AA	AA	AA	AA	AA	AA	AA	AA	AA	AA	AA	AA	AA	AA	AA	AA	AA	AA	AA	AA	AA	AA	AA	AA	AA	AA	AA	AA	AA
chr1D	187927001	187935500	8500	AA	AA	dd	AA	AA	AA	AA	AA	AA	AA	AA	AA	AA	AA	AA	AA	AA	AA	AA	AA	AA	AA	AA	AA	AA	AA	AA	AA	AA	AA	AA	AA	AA	AA	AA	AA	AA	AA	AA	AA	AA	AA	Ad	AA	AA	AA
chr1D	187943001	187948000	5000	AA	AA	dd	AA	AA	AA	AA	AA	AA	AA	AA	AA	AA	AA	AA	AA	AA	AA	AA	AA	AA	AA	AA	AA	AA	AA	AA	AB	AA	AA	AA	AA	AA	AA	AA	Ad	AA	AA	AA	Ad	AA	AA	AA	AA	AA	AA
chr1D	188068001	188076000	8000	AA	AA	dd	AA	AA	AA	AA	AA	AA	AA	AA	AA	AA	AA	AA	AA	AA	AA	AA	AA	AA	AA	AA	AA	AA	AA	AA	AA	AA	AA	AA	AA	AA	AA	AA	Ad	AA	AA	AA	Ad	AA	AA	AA	AA	AA	Ad
chr1D	188113001	188120000	7000	AA	AA	BC	AA	AA	AA	AA	AA	AA	AA	AA	AA	AA	AA	AA	AA	AA	AA	AA	AA	AA	AA	AA	AA	AA	AA	AA	AA	AA	AA	AA	AA	AA	AA	AA	Ad	dd	AB	AA	AA	AA	AA	AA	AA	AA	AA
chr1D	188126001	188131000	5000	AA	AA	BC	AA	AA	AA	AA	AA	AA	AA	AA	AA	AA	AA	AA	AA	AB	AA	AA	AA	AA	AA	AA	AA	AA	AA	AA	AA	AA	AA	AB	AA	AA	AB	AA	AA	dd	AA	AA	AA	AA	AA	AA	AA	AA	AA
chr1D	188136001	188140000	4000	Ad	Ad	Ad	Ad	Ad	Ad	Ad	Ad	Ad	Ad	Ad	Ad	Ad	Ad	Ad	Ad	Ad	Ad	Ad	Ad	Ad	Ad	Ad	Ad	Ad	Ad	Ad	Ad	Ad	Ad	Ad	Ad	Ad	Ad	Ad	dd	dd	Ad	Ad	Ad	Ad	Ad	Ad	Ad	Ad	Ad
chr1D	188144501	188149000	4500	Ad	Ad	dd	Ad	Ad	Ad	Ad	Ad	Ad	Ad	dd	Ad	Ad	Ad	Ad	Ad	dd	Ad	Ad	Ad	Ad	Ad	Ad	Ad	Ad	Ad	Ad	Ad	Ad	Ad	Ad	Ad	Ad	Ad	Ad	Ad	dd	dd	dd	Ad	Ad	Ad	dd	dd	dd	dd
chr1D	188181501	188187500	6000	AA	AA	BC	AA	AA	AA	AA	AA	AA	AA	AA	AA	AA	AA	AA	AA	AA	AA	AA	AA	AA	AA	AA	AA	AA	AA	AA	BB	AA	AA	AA	AB	AA	AA	AA	Ad	dd	AA	AA	Ad	AA	AA	AA	AA	AA	AA
chr1D	188196001	188204500	8500	AA	AA	dd	AA	Ad	AA	AA	Ad	AA	AA	Ad	AA	AA	Ad	AA	AA	AA	AA	AA	Ad	AA	AA	Ad	AA	Ad	AA	AA	Ad	AA	AA	AA	AA	AA	AA	AA	AA	Ad	AA	AA	AA	Ad	Ad	AA	Ad	AA	AA
chr1D	188261001	188269000	8000	AA	AA	dd	AA	AA	AA	AA	AA	AA	AA	AA	AA	AA	AA	AA	AA	AA	AA	AA	AA	AA	AA	AA	AA	AA	AA	AA	AA	AA	AA	AA	AA	AA	AA	AA	AA	AA	AA	AA	AA	AA	AA	AA	AA	AA	AA
chr1D	188389001	188393000	4000	Ad	dd	dd	Ad	Ad	Ad	Ad	Ad	Ad	Ad	Ad	Ad	Ad	Ad	Ad	Ad	Ad	Ad	Ad	Ad	Ad	Ad	Ad	Ad	Ad	Ad	Ad	Ad	Ad	Ad	Ad	Ad	dd	Ad	Ad	dd	dd	Ad	dd	Ad	Ad	Ad	Ad	dd	Ad	Ad
chr1D	188410501	188420000	9500	AA	AA	dd	AA	AA	AA	AA	AA	AA	AA	AA	AA	AA	AA	AA	AA	AA	AA	AA	AA	AA	AA	AA	AA	AA	AA	Ad	AA	Ad	AA	AA	AA	AA	AA	AA	Ad	Ad	Ad	AA	Ad	AA	Ad	Ad	Ad	Ad	Ad
chr1D	188608501	188616000	7500	AA	AA	Ad	AA	AA	AA	AA	AA	AA	Ad	Ad	AA	AA	AA	AA	AA	AA	AA	AA	AA	AA	AA	AA	Ad	AA	AA	AA	AA	AA	AA	AA	AA	Ad	AA	AA	AA	dd	Ad	Ad	AA	AA	AA	AA	AA	Ad	AA
chr1D	188668001	188682000	14000	AA	AA	AA	AA	dd	AA	AA	AA	AA	AA	AA	AA	AA	AA	AA	AA	AA	AA	AA	AA	AA	AA	AA	AA	AA	AA	AA	AB	AA	AA	AA	AA	AA	AA	AA	Ad	AA	AA	AA	AA	AA	AA	AA	AA	AA	AA
chr1D	188704001	188727500	23500	AA	AA	dd	AA	AA	AA	AA	AA	AA	AA	AA	AA	AA	AA	AA	AA	AA	AA	AA	AA	Ad	AA	AA	AA	AA	AA	AA	AA	AA	AA	AA	AA	AA	AA	AA	Ad	Ad	AA	Ad	Ad	AA	Ad	AA	AA	Ad	AA
chr1D	188721501	188782500	61000	AA	AA	AA	AA	AA	AA	AA	AA	AA	AA	AA	AA	AA	AA	AA	AA	AA	AA	AA	AA	dd	AA	AA	AA	AA	AA	AA	AA	AA	AA	AA	AA	AA	AA	AA	AA	AA	AA	AA	AA	AA	AA	AA	AA	AA	AA
chr1D	189038001	189078000	40000	AA	AA	AA	AA	AA	AA	AA	AA	AA	AA	AA	AA	AA	AA	AA	AA	AA	AA	AA	AA	AA	AA	AA	AA	AA	AA	AA	AA	AA	AA	AA	AA	AA	AA	AA	AA	AA	AA	AA	AA	AA	AA	AA	AA	AA	AA
chr1D	189076501	189086500	10000	AA	AA	dd	AA	AA	AA	AA	AA	AA	AB	AA	AB	AB	AA	AA	AA	AA	AA	AA	AA	AA	AA	AA	AA	AA	AA	AA	AB	AA	AA	AA	AA	AA	AA	AA	AA	AB	AA	AA	AA	AA	AA	AA	AA	AA	AA
chr1D	189090501	189144000	53500	AA	AA	AA	AA	AA	AA	AA	AA	AA	AA	AA	AA	AA	AA	AA	AA	AA	AA	AA	AA	AA	AA	AA	AA	AA	AA	AA	AA	AA	AA	AA	AA	AA	AA	AA	AA	AA	AA	AA	AA	AA	AA	AA	AA	AA	AA
chr1D	189150501	189158500	8000	AA	AA	dd	AA	AA	AA	AA	AA	AA	AA	AA	AA	AA	AA	AA	AA	AA	AA	AA	AA	AA	AA	AA	AA	AA	AA	AA	AA	AA	AA	AA	AA	AA	AA	AA	Ad	Ad	Ad	Ad	Ad	AA	Ad	AA	Ad	Ad	AA
chr1D	189375501	189379500	4000	AA	AA	AA	AA	AB	AA	AA	AA	AA	AB	AA	AA	AA	AA	AA	AA	AA	AA	AA	AA	AA	AA	AA	AA	AA	AA	AA	AA	AA	AA	AA	AA	AA	AA	AA	AA	dd	AA	AA	AA	AA	AA	Ad	AA	AB	AA
chr1D	189530001	189553500	23500	AA	AA	AA	AA	AA	AA	AA	AA	AA	AA	AA	AA	AA	AA	AA	AA	AA	AA	AA	AA	AA	AA	AA	AA	AA	AA	AA	AA	AA	AA	AA	AA	AA	AA	AA	AA	AA	AA	AA	AA	AA	AA	AA	AA	AA	AA
chr1D	189563501	189569000	5500	dd	dd	dd	dd	dd	dd	dd	dd	dd	dd	dd	dd	dd	dd	dd	dd	dd	dd	dd	dd	dd	dd	dd	dd	dd	dd	dd	dd	dd	dd	dd	dd	dd	dd	dd	dd	dd	dd	dd	dd	dd	dd	dd	dd	dd	dd
chr1D	190018001	190024500	6500	AA	AA	dd	Ad	Ad	Ad	AA	Ad	AA	AA	Ad	AA	AA	AA	AA	Ad	AA	AA	AA	AA	AA	AA	AA	AA	Ad	Ad	AA	Ad	AA	AA	AA	AA	AA	AA	AA	Ad	Ad	Ad	Ad	Ad	Ad	Ad	Ad	Ad	Ad	Ad
chr1D	190174001	190181500	7500	AA	AA	dd	AA	AA	AB	AA	AA	AA	AA	AA	AB	AA	AA	AA	AA	AA	AA	AA	AA	AA	AA	AA	AA	AA	AA	AB	AA	AA	AA	AA	AA	AA	AA	AA	Ad	AA	AA	Ad	AA	AA	AA	AA	AA	AA	AA
chr1D	190444001	190450500	6500	AA	AA	Ad	AA	AA	AA	AA	AA	AA	AA	AA	AA	AA	AA	AA	AA	AA	AA	AA	AA	AA	AA	AA	AA	AA	AA	AA	AA	AA	Ad	AA	AA	AA	AA	AA	AA	dd	AA	AA	AA	AA	AA	AA	AA	AA	AA
chr1D	190923501	190934000	10500	AA	AA	dd	AA	AA	AA	AA	AA	AA	BB	AA	AA	AA	AA	AA	AA	AA	AA	AA	BB	AA	AA	AA	AA	AA	AA	AA	AA	AB	AA	AA	AA	AA	AA	AA	AA	AA	AA	AA	AA	AA	AA	AA	AA	AA	AA
chr1D	190984501	190989000	4500	AA	AB	dd	AA	AA	AA	AA	AA	AB	BC	AA	AA	AA	AA	AB	AA	AA	AA	AA	AB	AB	AA	AA	AB	AA	AA	AB	AA	AA	AA	AA	AA	AA	AA	AA	AB	AA	AA	AA	AB	AB	AA	AA	AA	AA	AA
chr1D	191196001	191214500	18500	AA	AA	dd	AA	AA	AA	AA	AA	AA	BB	AA	AA	AA	AA	AA	AA	AA	AA	AA	BB	AA	AA	AA	AA	AA	AA	AA	AA	AA	AA	AA	AA	AA	AA	AA	Ad	dd	AA	Ad	Ad	AA	Ad	AA	Ad	Ad	AA
chr1D	191220501	191226000	5500	AA	AA	dd	AA	AA	AA	AA	AA	AA	BC	AA	AA	AA	AA	AA	AA	AA	AA	AA	AB	AA	AA	AA	AA	AA	AA	AA	AA	AA	AA	AA	AA	AA	AA	AA	AB	AA	AA	AA	AB	AA	AA	Ad	AA	AB	Ad
chr1D	191356501	191362500	6000	AA	AA	dd	AA	AA	AA	AA	AA	AA	BC	AA	AA	AA	AA	AA	AA	AA	AA	AA	BB	AA	AA	AA	AA	AA	AA	AA	AB	AA	AA	AA	AA	AA	AA	AA	Ad	Ad	AA	AA	Ad	AA	AA	AA	AA	AA	AA
chr1D	191897001	191929000	32000	AA	AA	dd	AA	AA	AA	AA	AA	AA	AA	AA	AA	AA	AA	AA	AA	AA	AA	AA	AA	AA	AA	AA	AA	AA	AA	AA	AA	AA	AA	AA	AA	AA	AA	AA	AA	Ad	AA	AA	AA	AA	AA	AA	AA	AA	AA
chr1D	192129501	192134500	5000	AA	AA	dd	Ad	AA	AA	AA	AA	AA	Ad	Ad	AA	Ad	AA	AA	AA	Ad	Ad	AA	AA	AA	AA	AA	AA	AA	AA	Ad	AA	Ad	AA	AA	AA	AA	AA	AA	AB	dd	AA	AA	AA	AA	AA	AA	AA	AA	AA
chr1D	192307001	192311500	4500	AA	AA	dd	AA	AA	AA	AA	AA	AA	AA	AA	AA	AA	AA	AA	AA	AA	AA	AA	AA	AA	AA	AA	AA	AA	AA	AA	AA	AA	AA	AA	AA	AA	AA	AA	AA	dd	AA	AA	AA	AA	AA	Ad	AA	AA	Ad
chr1D	192692501	192698000	5500	AA	AA	AA	AA	AB	AB	AA	AA	AA	AA	AA	AA	AA	AB	AA	AA	AA	AA	AA	AA	AA	AB	AB	AA	AA	AA	AA	AA	AB	AA	AB	AA	AA	AB	AB	BB	dd	AA	AA	AB	AA	AA	AA	AA	AA	AA
chr1D	192791001	192796000	5000	AA	AA	dd	AA	AA	AA	AA	AB	AA	AB	AA	AA	AA	AB	AA	AA	AA	AA	AB	AA	AA	AB	AA	AA	AA	AA	AA	AA	AA	AA	AA	AA	AA	AA	AA	AA	AA	AA	AA	AA	AA	AA	AB	AA	AA	AB
chr1D	192847501	192851500	4000	AA	AA	dd	AA	AA	AA	AA	AA	AA	AA	AA	AA	AA	AA	AA	AA	AA	AA	AA	AA	AA	AA	AA	AA	AA	Ad	AA	AA	AA	AA	AA	AA	AA	AA	AA	Ad	dd	AA	AA	AA	AA	AA	AA	AA	AA	AA
chr1D	193057001	193077500	20500	AA	AA	dd	AA	AA	AA	AA	AA	AA	AA	AA	AA	AA	AA	AA	AA	AA	AA	AA	AA	AA	AA	AA	AA	AA	AA	AA	AA	AA	AA	AA	AA	AA	AA	AA	AA	AA	AA	AA	AA	AA	AA	AA	AA	AA	AA
chr1D	193146501	193151500	5000	AA	Ad	dd	Ad	AA	AA	AA	AA	AA	AA	AA	Ad	Ad	AA	AA	AA	AA	AA	Ad	AA	AA	Ad	AA	AA	AA	AA	AA	AA	AA	AA	AA	AA	Ad	AA	AA	AB	AA	AB	AA	AA	AA	AA	AA	AA	AA	AA
chr1D	193230001	193238500	8500	AA	Ad	dd	Ad	AA	Ad	AA	Ad	Ad	AA	Ad	AA	AA	Ad	AA	Ad	AA	AA	Ad	AA	AA	AA	Ad	AA	Ad	AA	AA	AA	AA	AA	AA	AA	AA	AA	Ad	Ad	dd	Ad	Ad	Ad	AA	Ad	Ad	Ad	Ad	Ad
chr1D	193310501	193317000	6500	AA	AA	dd	AB	AA	AA	AA	AA	AA	AA	AA	AA	AA	AA	AA	AA	AA	AA	AA	AA	AA	AA	AA	AA	AA	AA	Ad	Ad	AA	AA	AA	AB	AA	AA	AA	AB	AA	AA	AA	AB	AA	AA	Ad	AA	AA	Ad
chr1D	193392501	193399500	7000	AA	Ad	dd	Ad	Ad	Ad	Ad	Ad	Ad	AA	Ad	Ad	AA	AA	Ad	Ad	AA	Ad	Ad	Ad	AA	AA	AA	Ad	Ad	Ad	AA	Ad	AA	Ad	Ad	Ad	AA	AA	Ad	Ad	Ad	Ad	Ad	Ad	Ad	Ad	Ad	Ad	Ad	Ad
chr1D	193435501	193444500	9000	Ad	Ad	dd	Ad	Ad	Ad	Ad	Ad	Ad	Ad	Ad	AA	Ad	Ad	Ad	Ad	Ad	Ad	Ad	Ad	Ad	Ad	Ad	Ad	AA	Ad	Ad	Ad	Ad	Ad	Ad	Ad	Ad	Ad	Ad	Ad	Ad	Ad	Ad	Ad	Ad	Ad	Ad	Ad	Ad	Ad
chr1D	193466501	193474000	7500	AA	AA	dd	AB	AA	AA	AA	AA	AA	AA	AA	AA	AA	AA	AA	AA	AA	AA	AA	AA	AA	AA	AA	AA	AA	AA	AA	AA	AA	AA	AA	AA	AA	AA	AA	AA	dd	Ad	AA	AA	AA	AA	AA	AA	AA	Ad
chr1D	193478001	193483000	5000	AA	AA	dd	AA	AA	AA	AA	AA	AA	AA	AA	AA	AA	AA	AA	AA	AA	AA	AA	AA	AA	AA	AA	AB	AA	AA	AA	AA	AA	AA	AA	AA	AA	AA	AA	AA	AA	Ad	AA	AA	AA	Ad	AA	Ad	AA	Ad
chr1D	193568501	193572500	4000	Ad	Ad	dd	Ad	Ad	Ad	Ad	Ad	Ad	Ad	Ad	Ad	Ad	Ad	Ad	Ad	Ad	Ad	dd	Ad	Ad	Ad	Ad	Ad	Ad	Ad	Ad	Ad	Ad	Ad	Ad	Ad	Ad	Ad	Ad	dd	dd	Ad	dd	dd	Ad	Ad	Ad	dd	dd	Ad
chr1D	193589001	193604000	15000	AA	AA	dd	AA	AA	AA	AA	AA	AA	AA	AA	AA	AA	AA	AA	AA	AA	AA	AA	AA	AA	AA	AA	AA	AA	AA	AA	AA	AA	AA	AA	AA	AA	AA	AA	AA	AA	AA	AA	AA	AA	AA	AA	AA	AA	AA
chr1D	193755501	193760500	5000	AA	AA	dd	AA	AA	AA	AA	AA	AA	AA	AA	AA	AA	AA	AA	AA	AA	AA	AA	AA	AA	AA	AA	AA	AA	AA	AA	AA	AA	AA	AA	AA	AA	AA	AA	AA	Ad	Ad	Ad	AA	AA	Ad	AA	Ad	AA	AA
chr1D	193823001	193854000	31000	AA	AA	dd	AA	AA	AA	AA	AA	AA	AA	AA	AA	AA	AA	AA	AA	AA	AA	AA	AA	AA	AA	AA	AA	AA	AA	AA	AA	AA	AA	AA	AA	AA	AA	AA	AA	AA	AA	AA	AA	AA	AA	AA	AA	AA	AA
chr1D	194066501	194076000	9500	AA	AA	dd	AA	AA	AA	AA	AA	AA	AA	AA	AA	AA	AA	AA	AA	AA	AA	AA	AA	AA	AA	AA	AA	AA	AA	AA	AA	Ad	AA	AA	AA	AA	AA	AA	AA	AA	AA	AA	AA	AA	AA	AA	AA	AA	AA
chr1D	194118501	194127000	8500	Ad	AA	dd	Ad	AA	Ad	AA	AA	AA	Ad	AA	Ad	AA	Ad	AA	AA	AA	AA	Ad	AA	AA	AA	AA	Ad	Ad	Ad	AA	Ad	AA	AA	AA	AA	Ad	AA	AA	Ad	Ad	Ad	Ad	Ad	AA	Ad	Ad	Ad	Ad	Ad
chr1D	194377001	194382500	5500	AA	AA	AA	AA	AA	AB	AA	AA	AA	AA	AA	AA	AA	AA	AA	AA	AA	AA	AA	AA	AA	AA	AA	AA	AA	AA	AA	AB	AA	AA	AA	AA	AB	AA	AA	Ad	dd	AB	AA	Ad	AA	AA	AA	AA	AA	AA
chr1D	194478501	194482500	4000	dd	dd	dd	dd	dd	dd	dd	dd	dd	dd	dd	dd	dd	dd	dd	dd	dd	dd	dd	dd	dd	dd	dd	dd	dd	dd	dd	dd	dd	dd	dd	dd	dd	dd	dd	dd	dd	dd	dd	dd	dd	dd	dd	dd	dd	dd
chr1D	194479001	194492500	13500	Ad	AA	dd	Ad	Ad	Ad	Ad	AA	Ad	Ad	Ad	Ad	Ad	Ad	Ad	Ad	AA	Ad	Ad	Ad	Ad	Ad	Ad	Ad	Ad	Ad	Ad	Ad	Ad	Ad	Ad	Ad	AA	Ad	Ad	dd	dd	Ad	Ad	Ad	Ad	Ad	Ad	Ad	Ad	Ad
chr1D	194527001	194532000	5000	AA	AA	dd	AA	AA	AA	AA	AA	Ad	AA	AA	AA	AA	AA	AA	AA	AA	Ad	AA	AA	AA	AA	AA	AA	AA	AA	Ad	AA	Ad	AA	Ad	AA	AA	AA	AA	AA	AA	AA	AA	AA	AA	AA	AB	AA	AA	AA
chr1D	194553001	194565500	12500	AA	AA	dd	AA	AA	AA	AA	AA	AA	AA	AA	AA	AA	AA	AA	AA	AA	AA	AA	AA	AA	AA	AA	AA	AA	AA	AA	AA	AA	AA	AA	AA	AA	AA	AA	AA	AA	AA	AA	AA	AA	AA	AA	AA	AA	AA
chr1D	194647501	194658000	10500	AA	AA	AA	AA	AA	AA	AA	AA	AA	AA	AA	AA	AA	AA	AA	AA	AA	AA	AA	AA	AA	AA	AA	AB	AB	AA	AA	AA	AB	AA	AA	AA	AA	AA	AA	AB	dd	AA	AA	AA	AA	AA	AA	AA	AA	AA
chr1D	194661501	194666500	5000	AA	AA	dd	Ad	AA	Ad	AA	AA	AA	AA	AA	AA	AA	AA	Ad	AA	AA	AA	AA	Ad	AA	AA	AA	AA	AA	AA	AA	AA	AA	AA	Ad	AA	AA	AA	AA	Ad	Ad	Ad	Ad	Ad	Ad	Ad	AA	Ad	Ad	Ad
chr1D	194889501	194906500	17000	Ad	AA	dd	AA	Ad	Ad	Ad	Ad	AA	AA	AA	AA	AA	Ad	AA	Ad	AA	Ad	AA	AA	AA	AA	Ad	Ad	AA	AA	Ad	AA	Ad	AA	Ad	AA	AA	Ad	AA	Ad	Ad	Ad	Ad	Ad	AA	Ad	AA	Ad	Ad	Ad
chr1D	194956501	194969000	12500	AA	AA	dd	AA	AA	AA	AA	AA	AA	AA	AA	AA	AA	AA	AB	AB	AA	AA	AB	AA	AB	AA	AA	AA	AA	AA	AB	AB	AA	AA	AA	AB	AA	AA	AB	AA	AA	AA	AA	AA	AA	AA	AA	AA	AA	AA
chr1D	195037501	195051500	14000	AA	AA	dd	AA	AA	AA	AB	AB	AA	AA	AB	AB	AA	AB	AA	AB	AB	AA	AB	AA	AA	AA	AB	AA	AB	AB	AA	AB	AB	AA	AA	AA	AA	AA	AB	BB	AB	AB	AA	AA	AA	AB	AA	AA	AA	AA
chr1D	195082001	195086000	4000	Ad	AA	dd	AA	AA	AA	AA	AA	AA	AA	AA	AA	AA	AA	AA	AA	AA	AA	AA	AA	AA	AA	AA	AA	AA	AA	AA	AA	AA	Ad	AA	AA	AA	AA	Ad	Ad	Ad	AA	Ad	Ad	AA	Ad	Ad	Ad	Ad	Ad
chr1D	195282001	195289500	7500	AA	AA	AA	AA	AA	AA	AA	AA	AA	AA	AA	AA	AA	AA	AA	AA	AA	AA	AA	AA	AA	AA	AA	AA	AA	AA	AA	AA	AA	AA	AA	AA	AA	AA	AA	Ad	dd	AA	AA	AA	AA	AA	AA	AA	AA	AA
chr1D	195364501	195374000	9500	AA	AA	dd	AA	AA	AA	AA	AA	AA	AA	AA	AA	AA	AA	AA	AA	AA	AA	AA	AA	AA	AA	AA	AA	AA	AA	AA	AA	Ad	AA	AA	AA	AA	AA	AA	AA	AA	Ad	Ad	AA	AA	AA	Ad	AA	AA	AA
chr1D	195697501	195703500	6000	AA	AA	dd	AA	Ad	AA	AA	AA	AA	AA	AA	AA	AA	AA	AA	AA	AA	AA	AA	AA	AA	AA	AA	AA	AA	AA	AA	AB	AA	AA	AA	AA	AA	AA	AA	Ad	AA	AB	AA	AA	AA	AA	AA	AA	AA	AA
chr1D	195723001	195742500	19500	AA	AA	dd	AA	AA	AA	AA	AA	AA	AA	AA	AA	AA	AA	AA	AA	AA	AA	AA	AA	AA	AA	AA	AA	AA	AA	AA	AA	AA	AA	AA	AA	AA	AA	AA	AB	AA	AA	AA	AA	AA	AA	AA	AA	AA	AA
chr1D	195973001	195980500	7500	AA	AA	dd	AA	AA	AA	AA	AA	Ad	AA	Ad	AA	AA	AA	AA	AA	AA	AA	AA	AA	AA	AA	AA	AA	AA	AA	AA	AA	AA	AA	AA	AA	AA	AA	AA	AA	AA	Ad	Ad	AA	AA	Ad	Ad	Ad	Ad	Ad
chr1D	196004001	196027000	23000	AA	AA	dd	AA	AA	AA	AA	AA	AA	AA	AA	AA	AA	AA	AA	AA	AA	AA	Ad	AA	AA	AA	AA	AA	AA	AA	AA	AA	AA	AA	AA	AA	AA	AA	AA	Ad	Ad	AA	Ad	Ad	AA	Ad	Ad	AA	Ad	Ad
chr1D	196264501	196271500	7000	AA	AA	dd	AA	AA	AA	AA	AA	Ad	AA	AA	AA	AA	AA	AA	AA	AA	AA	AA	Ad	AA	Ad	AA	AA	AA	AA	AA	AA	AA	AA	AA	AA	AA	AA	AA	AA	Ad	Ad	AA	AA	AA	AA	Ad	Ad	AA	Ad
chr1D	196409501	196437500	28000	AA	AA	dd	AA	AA	AA	AA	AA	AA	AA	AA	AA	AA	AA	AA	AA	AA	AA	AA	AA	AA	AA	AA	AA	AA	AA	AA	AA	AA	AA	AA	AA	AA	AA	AA	AA	AA	AA	AA	AA	AA	AA	AA	AA	AA	AA
chr1D	196480001	196484000	4000	AA	AA	dd	AA	Ad	AA	AA	Ad	AA	AA	AA	AA	AA	AA	Ad	AA	Ad	Ad	AA	AA	AA	AA	AA	AA	AA	AA	AA	AA	Ad	AA	AA	AA	AA	Ad	AA	Ad	AA	AA	Ad	Ad	AA	Ad	AA	Ad	Ad	AA
chr1D	196506001	196515500	9500	AA	Ad	dd	Ad	Ad	Ad	Ad	Ad	Ad	AA	Ad	AA	Ad	Ad	Ad	AA	Ad	AA	Ad	Ad	Ad	AA	Ad	Ad	Ad	AA	AA	Ad	AA	Ad	AA	Ad	AA	AA	Ad	Ad	dd	Ad	Ad	dd	Ad	Ad	Ad	Ad	Ad	Ad
chr1D	196568501	196572500	4000	dd	dd	dd	dd	dd	dd	dd	dd	dd	dd	dd	dd	dd	dd	dd	dd	dd	dd	dd	dd	dd	dd	dd	dd	dd	dd	dd	dd	dd	dd	dd	dd	dd	dd	dd	dd	dd	dd	dd	dd	dd	dd	dd	dd	dd	dd
chr1D	196569001	196576500	7500	Ad	Ad	dd	Ad	Ad	Ad	Ad	Ad	dd	Ad	Ad	Ad	Ad	Ad	Ad	Ad	Ad	Ad	Ad	Ad	Ad	Ad	Ad	Ad	Ad	Ad	Ad	Ad	Ad	Ad	Ad	Ad	Ad	Ad	AA	Ad	dd	Ad	Ad	Ad	Ad	dd	Ad	Ad	Ad	Ad
chr1D	196628001	196634500	6500	AA	Ad	AA	AA	AA	AA	Ad	AA	AA	AA	dd	AA	AA	AA	AA	AA	AA	AA	AA	AA	AA	AA	AA	AA	AA	AA	AA	AA	AA	AA	AA	AA	AA	Ad	AA	AA	AA	AA	AA	AA	AA	AA	AA	AA	AA	AA
chr1D	196638001	196642000	4000	AA	AA	dd	AA	AA	AA	AA	AA	AA	AA	AA	AA	AA	AA	AA	AA	AA	AA	AA	AA	AA	AA	AA	AA	AA	AA	AA	AA	AA	AA	AA	AA	AA	AA	AA	AB	AA	AA	AA	AA	AA	AA	Ad	AA	AA	Ad
chr1D	196799501	196807500	8000	AB	AB	AB	AA	AA	AA	AA	AB	AB	AA	AB	AA	AB	AB	AB	AB	AA	AB	AB	AB	AB	AB	AB	AB	AB	AB	AB	AA	AA	AB	AA	AB	AB	AB	AB	BC	AA	AB	AB	BB	AB	BB	Ad	AB	AB	AA
chr1D	197018501	197023000	4500	AA	AA	AA	AA	AA	AA	AA	AA	AA	AA	AA	AA	AA	AB	AA	dd	AA	AA	AA	AA	AA	AA	AA	AB	AA	AA	AA	AA	AA	AA	AA	AA	AA	AA	AA	AA	AA	AA	AA	AA	AA	AA	AA	AA	AA	AB
chr1D	197063001	197070500	7500	Ad	AA	dd	AA	Ad	AA	AA	AA	Ad	AA	AA	AA	Ad	AA	AA	AA	AA	AA	AA	AA	AA	AA	Ad	AA	AA	AA	AA	Ad	AA	AA	AA	Ad	AA	AA	AA	AA	Ad	Ad	Ad	Ad	AA	Ad	Ad	Ad	Ad	Ad
chr1D	197077001	197083500	6500	AA	AA	dd	AA	AA	AA	AA	AA	AA	AA	AA	AA	AA	AA	AA	AA	AA	AA	AA	AA	AA	AA	AB	AA	AA	AA	AA	AA	AA	AA	AA	AA	AA	AA	AA	AB	AA	AA	AA	AB	AA	AA	AA	AA	AA	AA
chr1D	197088501	197096000	7500	AA	Ad	dd	AA	AA	AA	AA	AA	AA	AA	AA	AA	AA	AA	AA	AA	AA	AA	AA	AA	AA	AA	AA	AA	AA	AA	AA	AA	AA	AA	AA	AA	AA	AA	AA	Ad	AA	AA	AA	AA	AA	AA	AA	AA	AA	AA
chr1D	197142501	197150000	7500	AA	AA	dd	AA	Ad	AA	AA	AA	Ad	AA	AA	Ad	AA	AA	AA	Ad	Ad	AA	AA	AA	AA	AA	AA	Ad	AA	AA	AA	Ad	AA	Ad	AA	AA	Ad	AA	AA	Ad	Ad	Ad	Ad	Ad	AA	Ad	Ad	Ad	Ad	Ad
chr1D	197179001	197190000	11000	AA	AB	dd	AA	AA	AB	AA	AA	AA	AA	AA	AA	AA	AA	AB	AA	AA	AA	AA	AA	AA	AA	AB	AA	AA	AA	AB	AB	AA	AB	AA	AB	AB	AA	AB	AA	AA	AB	AB	AA	AA	AA	AB	AA	AA	AB
chr1D	197263501	197269500	6000	AA	AA	dd	AA	AA	AA	AA	AA	AA	AA	AA	AA	AA	AA	AA	AA	AA	AB	AA	AA	AA	AA	AA	AA	AA	AA	AA	AA	AA	AA	AA	AA	AA	AA	AA	AB	AA	AA	AA	AA	AA	AA	AA	AA	AA	AA
chr1D	197282001	197292500	10500	AA	AA	dd	AA	AA	AA	AA	AA	AA	AB	AA	AA	AA	AA	AA	AA	AA	AA	AA	AA	AA	AA	AA	AA	AA	AA	AA	AA	AA	AA	AA	AA	AA	AA	AA	AA	AA	AA	AA	AA	AA	AA	AA	AA	AA	AA
chr1D	197305501	197315500	10000	Ad	Ad	dd	Ad	Ad	Ad	Ad	Ad	Ad	Ad	Ad	Ad	Ad	Ad	Ad	Ad	Ad	Ad	Ad	Ad	Ad	Ad	Ad	Ad	Ad	Ad	Ad	Ad	Ad	Ad	Ad	Ad	Ad	Ad	Ad	dd	dd	Ad	dd	dd	Ad	dd	Ad	Ad	Ad	dd
chr1D	197683501	197690500	7000	AA	AA	dd	AA	AA	AA	Ad	AA	Ad	Ad	Ad	AA	AA	AA	AA	AA	Ad	AA	AA	AA	AA	AA	AA	AA	AA	AA	AA	AA	Ad	AA	Ad	AA	AA	Ad	AA	AA	Ad	Ad	Ad	AA	AA	Ad	Ad	Ad	AA	Ad
chr1D	197785001	197789500	4500	Ad	AA	dd	Ad	AA	AA	AA	AA	AA	AA	AA	AA	AA	AA	AA	Ad	AA	AA	AA	AA	Ad	AA	Ad	AA	AA	AA	AA	Ad	AA	AA	AA	Ad	AA	Ad	AA	Ad	Ad	Ad	Ad	Ad	Ad	Ad	Ad	Ad	Ad	Ad
chr1D	197803001	197812500	9500	AA	AA	dd	AA	AA	AA	AA	AA	AA	AA	AA	AA	AA	AA	AA	AA	AA	AA	AA	AA	AA	AA	AA	AA	AA	AA	AA	AA	AA	AA	AA	AA	AA	AA	AA	AA	AA	AA	AA	AA	AA	AA	AA	AA	AA	AA
chr1D	197987001	197991000	4000	BC	BB	dd	BB	BB	BC	BB	BB	BB	BC	BB	BB	BB	BB	BC	BB	BB	BB	BB	BC	BB	BB	BC	BB	BB	BC	BC	BB	BC	BB	BC	BB	BC	BC	BB	BC	AA	BB	BB	BB	BB	AB	BB	BB	AB	AA
chr1D	198043501	198061000	17500	AA	AA	dd	AA	AA	AA	AA	AA	AA	AA	AA	AA	AA	AA	AA	AA	AA	AA	AA	AA	AA	AA	AA	AA	AA	AA	AA	AA	AA	AA	AA	AA	AA	AA	AA	AB	AA	AA	AA	AA	AA	AA	AA	AA	AA	AA
chr1D	198104501	198110000	5500	Ad	AA	dd	Ad	AA	AA	Ad	AA	Ad	Ad	AA	AA	AA	Ad	Ad	Ad	Ad	Ad	Ad	Ad	Ad	Ad	Ad	AA	Ad	Ad	AA	AA	AA	AA	AA	Ad	Ad	Ad	Ad	Ad	dd	AA	Ad	Ad	AA	AA	AA	AA	Ad	AA
chr1D	198306501	198311000	4500	AA	AA	dd	AA	AA	AA	AA	AA	AA	AA	AA	AA	AA	AA	AA	AA	AA	AA	AA	AA	AA	AA	AA	AA	AA	AA	AA	AA	AA	AA	AA	Ad	AA	AA	AA	AA	AA	AB	AA	AA	AA	AA	AB	AA	AA	AA
chr1D	198499501	198510500	11000	AA	AA	dd	AA	AA	AA	AA	AA	AA	AA	AA	AA	AA	AA	AA	AA	AA	AA	AA	AA	AA	AA	AA	AA	AA	AA	AA	AB	AA	AA	AA	AA	AA	AA	AB	Ad	AA	AA	AA	AA	AA	AA	AA	AA	AA	AA
chr1D	198619001	198635000	16000	AA	AA	AA	AA	AA	AA	AA	AA	AA	AA	AA	AA	AA	AA	AA	AA	AA	AA	AA	AA	AA	AA	AA	AA	AA	AA	AA	AA	AA	AA	AA	AA	AA	AA	AA	AA	dd	AA	AA	AA	AA	AA	AA	AA	AA	AA
chr1D	198779001	198784500	5500	AA	Ad	dd	Ad	AA	Ad	Ad	AA	Ad	Ad	Ad	Ad	Ad	Ad	AA	Ad	Ad	AA	AA	Ad	Ad	Ad	AA	AA	AA	AA	Ad	Ad	Ad	Ad	Ad	AA	Ad	Ad	Ad	Ad	AA	Ad	Ad	Ad	Ad	Ad	Ad	Ad	Ad	Ad
chr1D	198847001	198852000	5000	AA	AA	Ad	AA	AA	AA	AA	AA	AA	AA	AA	AA	AA	AA	AA	AA	AA	AA	AA	AA	AA	AA	AA	AA	dd	AA	AA	AA	AA	AA	AA	AA	AA	AA	AA	AA	AA	AA	AA	AA	AA	AA	AA	AA	AA	AA
chr1D	199028001	199039000	11000	AA	AA	dd	Ad	AA	AA	AA	AA	AA	AA	AA	AA	AA	AA	AA	AA	AA	AA	AA	AA	AA	AA	AA	AA	AA	AA	AA	AA	AA	AA	AA	AA	AA	AA	AA	AA	Ad	AA	Ad	AA	AA	AA	AA	AA	AA	AA
chr1D	199161501	199169000	7500	AA	AA	AA	AA	AA	AA	AA	AA	AB	AA	AA	AA	AA	AA	AA	AA	AA	AA	AA	AA	AA	AA	AA	AA	AA	AA	AA	AA	AA	AA	AA	AA	AA	AA	AB	AA	dd	AA	AA	AA	AA	AA	AA	AA	AA	AA
chr1D	199534501	199542500	8000	Ad	Ad	dd	AA	Ad	Ad	Ad	Ad	Ad	Ad	Ad	Ad	Ad	Ad	Ad	Ad	Ad	Ad	Ad	Ad	Ad	AA	Ad	Ad	Ad	Ad	Ad	Ad	Ad	Ad	AA	Ad	Ad	Ad	Ad	dd	Ad	Ad	Ad	Ad	Ad	Ad	Ad	Ad	Ad	Ad
chr1D	199569001	199574000	5000	AB	AA	dd	AA	AB	AA	AA	AA	AA	AA	AA	AA	AA	AA	AA	AA	AA	AA	AA	AA	AB	AB	AA	AA	AA	AA	AA	AA	AA	AA	AA	AA	AA	AA	AA	AB	AB	AA	AA	AA	AA	AA	AA	AA	AA	AA
chr1D	199662501	199666500	4000	AA	AA	dd	AA	AB	AA	AB	AB	AA	AB	AA	AB	AA	AA	AA	AA	AA	AA	AA	AA	AA	AB	AB	AA	AA	AA	AA	AA	AB	AA	AA	AA	AA	AB	AB	AB	AA	AA	AA	AA	AA	AA	AB	AB	AA	AB
chr1D	199878001	199908500	30500	AA	AA	dd	AA	AA	AA	AA	AA	AA	AA	AA	AA	AA	AA	AA	AA	AA	AA	AA	AA	AA	AA	AA	AA	AA	AA	AA	AA	AA	AA	AA	AA	AA	AA	AA	AA	AA	AA	AA	AA	AA	AA	AA	AA	AA	AA
chr1D	200168501	200173000	4500	AA	AA	dd	AA	AA	AA	AA	AA	AA	AA	AA	AA	AA	AA	AA	AA	AB	AA	AB	AA	AA	AB	AA	AA	AA	AA	AA	AA	AA	AA	AA	AA	AA	AA	AA	AB	AA	AA	AA	AA	AA	AA	AA	AA	AA	Ad
chr1D	200276001	200282000	6000	AA	AA	AA	AA	AA	AA	AA	AA	AA	AA	AA	AA	AA	AA	AA	AA	AA	AA	AA	AA	AA	AA	AA	AA	AA	AA	AA	AA	AA	AA	AA	AA	AA	AA	AA	AA	dd	AA	AA	AB	AA	AA	Ad	AA	AA	AA
chr1D	200313001	200320000	7000	Ad	Ad	dd	AA	Ad	Ad	Ad	Ad	AA	AA	Ad	Ad	Ad	Ad	AA	AA	AA	Ad	Ad	AA	AA	Ad	Ad	AA	Ad	Ad	AA	Ad	Ad	AA	AA	AA	AA	AA	Ad	Ad	Ad	Ad	Ad	Ad	AA	Ad	Ad	Ad	Ad	Ad
chr1D	200339501	200344000	4500	AA	Ad	dd	Ad	Ad	AA	Ad	Ad	Ad	Ad	AA	AA	Ad	Ad	Ad	Ad	Ad	Ad	Ad	Ad	Ad	Ad	Ad	Ad	Ad	Ad	Ad	Ad	Ad	Ad	Ad	Ad	Ad	Ad	Ad	Ad	dd	Ad	Ad	Ad	Ad	Ad	Ad	Ad	Ad	Ad
chr1D	200354001	200365500	11500	AA	AA	dd	Ad	AA	AA	AA	AA	AA	AA	AA	AA	AA	AA	AA	Ad	AA	AA	AA	AA	AA	AA	AA	AA	Ad	AA	AA	Ad	AA	AA	AA	AA	AA	AA	AA	Ad	Ad	Ad	Ad	Ad	Ad	Ad	Ad	Ad	Ad	Ad
chr1D	200579001	200586000	7000	AA	AA	dd	AA	AA	AA	AA	AA	AA	AA	AA	AA	AA	AA	Ad	AA	AA	AA	AA	AA	AA	AA	AA	AA	AA	AA	AA	AA	AA	AA	AA	AA	AA	AA	AA	Ad	AA	AA	AA	Ad	AA	AA	AA	AA	AA	AA
chr1D	200799001	200805500	6500	Ad	AA	dd	AA	AA	Ad	AB	AA	AA	AA	AA	AA	Ad	AA	AA	AA	AA	AA	AA	AA	AA	AA	AA	AA	AA	AA	AA	AA	AA	AA	AA	AB	AA	AA	AA	AB	AA	AA	AA	AA	AA	AA	AA	AA	AA	AA
chr1D	200894001	200901500	7500	Ad	AA	dd	AA	Ad	AA	AA	AA	Ad	AA	AA	AA	AA	AA	Ad	Ad	AA	AA	AA	AA	AA	AA	AA	AA	AA	AA	AA	Ad	AA	Ad	AA	AA	Ad	AA	AA	Ad	Ad	Ad	Ad	Ad	AA	Ad	Ad	Ad	Ad	Ad
chr1D	200908501	200916000	7500	AA	AA	dd	AA	AA	AA	AA	AA	AA	AA	AA	AA	AA	AA	AA	AA	AA	AA	AA	AA	AA	AA	AA	AA	AB	AA	AA	AA	AA	AA	AA	AA	AA	AA	AA	AA	AA	AA	AA	AA	AA	AA	AA	AA	AA	AA
chr1D	200958501	200968500	10000	AA	AA	dd	AA	AA	AB	AA	AB	AA	AA	AA	AA	AA	AA	AA	AA	AA	AA	AA	AA	AA	AA	AB	AA	AA	AA	AA	AA	AA	AB	AA	AB	AA	AA	AA	AB	AA	AB	AA	AB	AA	AB	AA	AA	AA	AB
chr1D	201474501	201478500	4000	AA	AB	Ad	AA	AA	AA	AA	AA	AA	AA	AA	AA	AA	AA	AA	AA	AA	AA	AA	AA	AA	AA	AA	AA	AA	AA	AA	AA	AA	AA	AA	Ad	AA	AA	AA	AA	dd	Ad	AA	AA	AA	AA	AA	AA	AA	Ad
chr1D	201659501	201665500	6000	AA	AA	dd	AA	AA	AA	AA	AA	AA	AA	AA	AA	AA	AA	AA	AA	AA	AA	AA	AA	AA	AA	AA	AA	AA	AA	AA	AA	AA	AA	AA	AA	AA	AA	AA	Ad	AA	Ad	Ad	AA	AA	AA	Ad	AA	Ad	Ad
chr1D	201778001	201793500	15500	AA	AA	dd	AA	AA	AA	AA	AA	AA	AA	AA	AA	AA	AA	AA	AA	AA	AA	AA	AA	AA	AA	AA	AA	AA	AA	AA	AA	AA	AA	AA	AA	AA	AA	AA	AA	AA	AA	AA	AA	AA	AA	AA	AA	AA	AA
chr1D	201847001	201851000	4000	AA	AA	AA	AA	AA	AA	AA	AB	AA	AA	AA	AA	AA	dd	AA	AA	AA	AA	AA	AA	AA	AB	AA	AA	AA	AA	AB	AA	AB	AA	AB	AA	AA	AA	AA	AA	AA	AA	AA	AA	AA	AA	AA	AA	AA	AB
chr1D	202151501	202163500	12000	AA	AA	dd	AA	AA	AA	AA	AA	AA	AA	AA	AA	AA	AA	AA	AA	AA	AA	AA	AA	AA	Ad	AA	AA	AA	AA	AA	AA	AA	AA	AA	AA	AA	AA	AA	AA	AA	AA	Ad	AA	AA	AA	AA	Ad	AA	AA
chr1D	202237501	202256500	19000	AA	AA	dd	AA	AA	AA	AA	AA	AA	AA	AA	AA	AA	AA	AA	AA	AA	AA	AA	AA	AA	AA	AA	AA	AA	AA	AA	AA	AA	AA	AA	AA	AA	AA	AA	AA	AA	AA	AA	AA	AA	AA	AA	AA	AA	AA
chr1D	202325001	202331500	6500	AA	AA	BC	AA	AA	AA	AA	AA	AA	AA	AA	AA	AA	AA	AA	AA	AA	AA	AA	AA	dd	AA	AA	AA	AA	AA	AA	AA	AA	AA	AA	AA	AA	AA	AA	AA	AA	AA	AA	AA	AA	AA	AA	AA	AA	AA
chr1D	202414001	202418000	4000	Ad	Ad	dd	Ad	AA	AA	AA	AA	AA	AA	AA	AA	AA	AA	AA	Ad	Ad	AA	AA	AA	AA	AA	AA	AA	AA	AA	AA	Ad	Ad	Ad	AA	AA	AA	AA	AA	Ad	Ad	Ad	Ad	Ad	AA	Ad	AA	Ad	Ad	Ad
chr1D	202422501	202427500	5000	AA	AA	dd	AA	AA	AA	AA	AA	Ad	AA	Ad	AA	AA	AA	AA	AA	AA	AA	AA	Ad	AA	AA	AA	AA	AA	AA	AA	Ad	AA	AA	AA	AA	AA	AA	AA	Ad	Ad	Ad	Ad	Ad	AA	Ad	Ad	Ad	Ad	Ad
chr1D	202482501	202487000	4500	Ad	Ad	dd	Ad	Ad	Ad	AA	AA	Ad	Ad	AA	AA	Ad	Ad	AA	AA	AA	Ad	AA	Ad	AA	AA	AA	AA	AA	AA	AA	Ad	AA	AA	AA	AA	AA	Ad	AA	Ad	Ad	Ad	Ad	Ad	AA	Ad	AA	Ad	Ad	Ad
chr1D	202732501	202738500	6000	AA	AA	dd	AA	AA	AA	AA	AA	AA	AA	AA	AA	AA	AA	AA	AA	AA	AA	AA	AA	AA	AA	AA	AA	AA	AA	AA	AA	AB	AA	AA	AA	AA	AA	AA	Ad	AA	AA	AA	AA	AA	AA	AA	AA	AA	AA
chr1D	202779001	202789500	10500	AA	AA	dd	Ad	AA	Ad	AA	AA	Ad	AA	Ad	Ad	Ad	Ad	Ad	Ad	Ad	Ad	AA	AA	Ad	AA	Ad	AA	Ad	AA	Ad	Ad	AA	AA	AA	AA	AA	AA	Ad	dd	Ad	Ad	Ad	Ad	AA	Ad	Ad	Ad	Ad	Ad
chr1D	202901001	202911500	10500	AA	AA	dd	AA	AA	AA	AA	AA	AA	AA	AA	AA	AA	AA	AA	AB	AA	AA	AA	AA	AA	AA	AA	AA	AA	AA	AA	AA	AA	AA	AA	AA	AA	AA	AA	Ad	AA	AB	AA	AA	AA	AA	AA	AA	AA	AA
chr1D	202941001	202945000	4000	AA	AA	AA	AA	AA	AA	AA	AA	AA	AA	AA	AA	AA	AA	AA	AA	AA	AA	AA	AA	AA	AA	AB	AA	AA	dd	AA	AA	AA	AA	AA	AA	AA	AA	AA	AA	AA	AA	AA	AB	AA	AA	AA	AA	AA	Ad
chr1D	203300501	203307000	6500	Ad	AA	dd	AA	Ad	Ad	Ad	AA	Ad	AA	AA	AA	Ad	AA	AA	Ad	AA	AA	AA	AA	Ad	AA	AA	AA	AA	AA	AA	AA	AA	Ad	AA	AA	AA	AA	AA	Ad	dd	Ad	Ad	Ad	AA	Ad	Ad	Ad	Ad	Ad
chr1D	205613001	205619000	6000	dd	dd	dd	dd	dd	dd	dd	dd	dd	dd	dd	dd	dd	dd	dd	dd	dd	dd	dd	dd	dd	dd	dd	dd	dd	dd	dd	dd	dd	dd	dd	dd	dd	dd	dd	dd	dd	dd	dd	dd	dd	dd	dd	dd	dd	dd
chr1D	205615001	205627500	12500	dd	dd	dd	dd	dd	dd	dd	dd	dd	dd	dd	dd	dd	dd	dd	dd	dd	dd	dd	dd	dd	dd	dd	dd	dd	dd	dd	dd	dd	dd	dd	dd	dd	dd	dd	dd	dd	dd	dd	dd	dd	dd	dd	dd	dd	dd
chr1D	205695001	205701500	6500	AA	AA	AA	Ad	AA	AA	AA	AA	AA	AA	AA	AA	AA	AA	AA	AA	AA	AA	AA	AA	AA	AA	AA	AA	AA	AA	AA	AA	AA	AA	AA	AA	AA	AA	AA	AB	AA	AA	AA	AA	AA	AA	AA	AA	AA	AA
chr1D	206065501	206070000	4500	AA	Ad	Ad	AA	Ad	Ad	Ad	Ad	Ad	Ad	Ad	Ad	Ad	Ad	Ad	AA	Ad	Ad	Ad	Ad	Ad	Ad	Ad	AA	Ad	Ad	Ad	Ad	Ad	Ad	Ad	Ad	Ad	Ad	Ad	AA	dd	Ad	Ad	Ad	Ad	Ad	Ad	Ad	Ad	Ad
chr1D	206260501	206271000	10500	AA	AA	AA	AA	AA	AA	AA	AA	dd	AA	AA	AA	AA	AA	AA	dd	AA	AA	dd	AA	AA	dd	dd	AA	AA	AA	AA	AA	AA	AA	Ad	dd	AA	dd	AA	AA	AA	AB	AA	AA	AA	AA	AA	AA	AA	AA
chr1D	207051501	207073500	22000	BB	AB	AA	AB	AA	AA	AA	AA	BB	BB	AA	AB	AB	AB	AB	BB	AB	AB	AA	AB	AA	BB	AB	AA	AA	AA	AA	AA	BB	BB	BB	AB	AB	AB	AB	AB	dd	AB	AA	AB	AA	AB	AB	AA	AB	AA
chr1D	208087001	208101500	14500	AA	AB	AA	AA	AA	AA	AA	AA	AA	AA	AB	AA	AA	AA	AA	AB	AB	AA	AB	AA	AA	AB	AA	AB	AA	AA	AA	AA	AA	AA	AA	AA	AA	AA	AA	AB	dd	AB	AA	AB	AA	AB	AA	AA	AB	AA
chr1D	208449501	208453500	4000	Ad	Ad	AA	Ad	Ad	Ad	AA	Ad	Ad	Ad	Ad	Ad	Ad	Ad	Ad	Ad	Ad	Ad	Ad	Ad	Ad	Ad	Ad	Ad	Ad	Ad	Ad	Ad	Ad	Ad	Ad	AA	Ad	Ad	Ad	dd	Ad	Ad	Ad	Ad	Ad	Ad	Ad	Ad	Ad	dd
chr1D	208513001	208519000	6000	AA	AA	AA	AA	AA	AA	AA	AA	AA	AA	AA	AA	AA	AA	AA	AA	AA	AA	AA	AA	AA	AA	AA	AA	AA	AA	AA	AA	AA	AA	AA	AA	AA	AA	AA	AB	AA	AA	AA	AA	AA	AA	AA	AA	AA	AA
chr1D	208661001	208675000	14000	AA	AA	AA	AA	AA	AA	AA	AA	AA	AA	AA	AA	AA	AA	AA	AA	AA	AA	AA	AA	AA	AA	AA	AA	AA	AA	AA	AA	AA	AA	AA	AA	AA	AA	AA	AA	AA	AA	AA	AA	AA	AA	AA	AA	AA	AA
chr1D	208837001	208850000	13000	AA	Ad	Ad	Ad	Ad	AA	Ad	AA	AA	AA	Ad	dd	dd	AA	Ad	Ad	dd	AA	Ad	AA	Ad	Ad	AA	Ad	Ad	Ad	Ad	AA	Ad	Ad	AA	Ad	Ad	Ad	Ad	Ad	AA	AA	Ad	dd	AA	dd	dd	Ad	Ad	AA
chr1D	208939501	208943500	4000	AA	AA	AA	AA	AA	AA	AA	AA	AA	AA	Ad	AA	Ad	AA	AA	Ad	AA	AA	AA	Ad	Ad	Ad	AA	Ad	AA	Ad	AA	AA	AA	Ad	AA	AA	AA	AA	Ad	Ad	dd	AA	Ad	Ad	AA	Ad	Ad	Ad	Ad	Ad
chr1D	209268001	209274000	6000	AA	AA	AA	Ad	AA	AA	AA	AA	AA	AA	AA	AA	AA	AA	AA	Ad	AA	AA	AA	AA	AB	AA	AA	AA	Ad	AA	AA	AA	AA	Ad	AA	AA	AA	AA	AA	AB	Ad	dd	Ad	Ad	AA	Ad	AA	dd	AA	Ad
chr1D	209409001	209423000	14000	AA	AA	AA	AA	AA	AA	AA	AA	AA	AA	AA	AA	AA	AA	AA	AA	AA	AA	AA	AA	AA	AA	AA	AA	AA	AA	AA	AA	AA	dd	AA	AA	AA	AA	AA	AA	AA	AA	AA	AA	AA	AA	AA	AA	AA	AA
chr1D	209584001	209590000	6000	AA	AA	AA	AA	AA	AA	AA	AA	AA	AA	AA	AA	AA	AA	AA	AA	AA	AA	AA	AA	AA	AA	AA	AA	AA	AA	AA	AA	AA	AA	AA	AA	AA	AA	AA	dd	dd	Ad	Ad	Ad	AA	Ad	Ad	Ad	Ad	Ad
chr1D	209659501	209664500	5000	Ad	dd	Ad	Ad	Ad	Ad	Ad	Ad	Ad	Ad	Ad	Ad	Ad	Ad	Ad	Ad	Ad	Ad	Ad	Ad	Ad	Ad	Ad	Ad	Ad	Ad	Ad	Ad	Ad	Ad	Ad	Ad	Ad	Ad	Ad	dd	Ad	Ad	dd	dd	Ad	dd	Ad	dd	dd	Ad
chr1D	209853001	209858500	5500	AA	AB	AA	AA	AA	AB	AA	AA	AA	AA	AB	AA	AA	AA	AA	AA	AA	AA	AA	AA	AA	dd	dd	AA	AA	AA	AA	AA	AB	AA	AA	AA	AA	AA	AA	AA	AA	AA	AA	AA	AA	AA	AA	AB	AA	AA
chr1D	209876501	209883000	6500	AA	AA	AA	AA	AA	AA	AA	AA	AB	AA	AB	AA	AA	AA	AA	AA	AB	AA	AA	AA	AA	AA	AA	AA	AA	AA	AA	AA	AA	AB	AA	AA	AB	AA	AA	Ad	dd	AB	AA	AA	AA	AA	AA	AA	AA	AA
chr1D	210508001	210516000	8000	AA	AA	AA	AA	AA	AA	AA	AA	AA	AA	AA	AA	AA	AA	AA	AA	AA	AA	AA	AA	AA	AA	AA	AA	AA	AA	AA	AA	AA	AA	AA	AA	AA	AA	dd	AA	AA	AA	AA	AA	AA	AA	AA	AA	AA	AB
chr1D	210521501	210527500	6000	AA	AA	AA	AA	AA	AA	AA	AA	AA	AA	AA	AA	AA	AA	AA	AA	AA	AA	AA	AA	AA	AA	AA	AA	AA	AA	AA	AA	AA	AA	AA	AA	AA	AA	dd	AA	AA	AA	AA	AA	AA	AA	AA	AA	AA	AA
chr1D	210521501	210538000	16500	AA	AA	AA	AA	AA	AA	AA	AA	AA	AA	AA	AA	AA	AA	AA	AA	AA	AA	AA	AA	AA	AA	AA	AA	AA	AA	AA	AA	AA	AA	AA	AA	AA	AA	dd	AA	AA	AA	AA	AA	AA	AA	AB	AA	AA	AA
chr1D	210533501	210538000	4500	AA	AA	AA	AA	AA	AA	AA	AB	AA	AB	AA	AB	AA	AA	AA	AB	AA	AB	AA	AA	AA	AA	AA	AA	AB	AA	AA	AA	AA	AA	AA	AA	AA	AA	dd	AA	AA	AA	AA	AA	AA	AA	AA	AA	AA	AA
chr1D	210878501	210882500	4000	AA	AA	AA	AA	AA	AA	AA	AA	AA	AA	AA	AA	AA	AA	AA	AA	AA	AA	AA	AA	AA	AA	AA	AA	AA	AA	AA	AA	AA	AA	AA	AA	AA	AA	AA	Ad	dd	AB	AA	Ad	AA	AA	AA	AA	AA	AA
chr1D	211045501	211051500	6000	BB	BB	AA	BB	AA	AB	AA	AA	BB	BC	AA	BC	BB	BC	BC	BB	BB	BB	AA	BB	AA	BB	BC	AA	AA	AB	dd	AA	BB	BB	BC	BB	BB	BC	BC	AA	AA	BC	AA	AA	AA	AB	AB	AA	AB	AA
chr1D	211552501	211556500	4000	dd	dd	dd	dd	dd	dd	dd	dd	dd	dd	dd	dd	dd	dd	dd	dd	dd	dd	dd	dd	dd	dd	dd	dd	dd	dd	dd	dd	dd	dd	dd	dd	dd	dd	dd	dd	dd	dd	dd	dd	dd	dd	dd	dd	dd	dd
chr1D	211938001	211942000	4000	AA	AA	AA	AA	AA	AA	AA	AA	AA	Ad	AA	AA	Ad	Ad	AA	Ad	Ad	AA	AA	AA	AA	AA	AA	AA	Ad	AA	AA	AA	Ad	Ad	AA	Ad	Ad	Ad	AB	AB	AA	AB	AA	AA	AA	AA	AB	AA	AA	AA
chr1D	211972501	211978000	5500	AA	AA	AA	AA	AA	AA	dd	AA	AA	AA	AA	AA	AA	AA	AA	AA	AA	AA	AA	AA	AA	AA	AA	AA	AA	AA	AA	AA	AA	AA	AA	AA	AA	AA	AA	AA	AA	Ad	Ad	AA	AA	AA	Ad	Ad	AA	Ad
chr1D	211999501	212005000	5500	AA	AA	AA	Ad	dd	Ad	AA	Ad	Ad	Ad	AA	AA	AA	Ad	AA	Ad	Ad	Ad	AA	AA	AA	Ad	AA	AA	AA	Ad	Ad	AA	Ad	AA	Ad	AA	Ad	Ad	AA	AA	AA	Ad	Ad	Ad	AA	Ad	Ad	Ad	Ad	AA
chr1D	212332001	212336000	4000	dd	dd	dd	dd	dd	dd	dd	dd	dd	dd	dd	dd	dd	dd	dd	dd	dd	dd	dd	dd	dd	dd	dd	dd	dd	dd	dd	dd	dd	dd	dd	dd	dd	dd	dd	dd	dd	dd	dd	dd	dd	dd	dd	dd	dd	dd
chr1D	212412501	212419500	7000	AA	AA	AA	AA	Ad	AA	Ad	AA	Ad	AA	AA	AA	Ad	AA	AA	AA	AA	AA	AA	AA	AA	AA	AA	AA	AA	AA	AA	AA	Ad	AA	AA	AA	AA	AA	AA	Ad	dd	Ad	AA	AA	AA	Ad	AA	AA	Ad	AA
chr1D	212429501	212461000	31500	AA	AA	AA	AA	AA	AA	AA	AA	AA	AA	AA	AA	AA	AA	AA	AA	AA	AA	AA	AA	AA	AA	AA	AA	AA	AA	AA	Ad	AA	AA	AA	AA	AA	AA	AA	Ad	Ad	Ad	Ad	Ad	AA	Ad	Ad	Ad	Ad	Ad
chr1D	212820001	212824000	4000	AA	Ad	Ad	Ad	Ad	Ad	Ad	AA	Ad	AA	Ad	Ad	AA	Ad	AA	Ad	Ad	Ad	Ad	Ad	Ad	AA	Ad	Ad	Ad	Ad	AA	AA	AA	Ad	Ad	AA	Ad	Ad	AA	Ad	dd	AA	Ad	Ad	AA	Ad	Ad	Ad	Ad	Ad
chr1D	212924501	212928500	4000	dd	dd	dd	dd	dd	dd	dd	dd	dd	dd	dd	dd	dd	dd	dd	dd	dd	dd	dd	dd	dd	dd	dd	dd	dd	dd	dd	dd	dd	dd	dd	dd	dd	dd	dd	dd	dd	dd	dd	dd	dd	dd	dd	dd	dd	dd
chr1D	212924501	212939000	14500	Ad	dd	Ad	Ad	dd	Ad	dd	Ad	dd	dd	Ad	dd	Ad	dd	dd	dd	dd	dd	Ad	Ad	dd	dd	Ad	Ad	Ad	Ad	Ad	dd	Ad	dd	Ad	Ad	Ad	Ad	dd	dd	dd	dd	dd	dd	dd	dd	dd	dd	Ad	dd
chr1D	213179001	213184000	5000	Ad	dd	dd	dd	dd	dd	dd	dd	dd	dd	dd	dd	dd	dd	Ad	Ad	dd	dd	dd	dd	dd	Ad	dd	Ad	Ad	dd	Ad	dd	dd	dd	dd	dd	dd	dd	dd	dd	dd	dd	dd	dd	dd	dd	dd	dd	dd	dd
chr1D	213256001	213263500	7500	AA	AA	AA	AA	AA	AA	AA	AA	AA	AA	AA	AA	AA	AA	AA	AA	AA	AA	AA	AA	AA	AA	AA	AA	Ad	AA	AA	AA	AA	AA	AA	AA	AA	AA	AA	AA	dd	Ad	Ad	Ad	AA	AA	Ad	Ad	AA	Ad
chr1D	213273501	213286000	12500	AA	AA	AA	AA	AA	AA	AA	AA	AA	AA	AA	AA	AA	AA	AA	AA	AA	AA	AA	AA	AA	AA	AA	AA	AA	AA	AA	AA	AA	AA	AA	AA	AA	AA	AA	Ad	dd	Ad	Ad	Ad	AA	Ad	Ad	Ad	Ad	AA
chr1D	213353001	213360000	7000	dd	dd	dd	dd	dd	dd	dd	dd	dd	dd	dd	dd	dd	dd	dd	dd	dd	dd	dd	dd	dd	dd	dd	dd	dd	dd	dd	dd	dd	dd	dd	dd	dd	dd	dd	dd	dd	dd	dd	dd	dd	dd	dd	dd	dd	dd
chr1D	213784501	213791500	7000	AA	AA	AA	AA	AA	AA	AA	AA	AA	AA	AA	AA	AA	AA	AA	AA	AA	AA	AA	Ad	AA	AA	AA	AA	AA	AA	AA	AA	AA	AA	AA	AA	AA	AA	AA	AA	dd	AA	AA	AA	AA	AA	AA	AA	AA	AA
chr1D	213834001	213840000	6000	AA	AA	AA	AA	AA	AA	AA	AA	AA	AA	AA	AA	AA	AA	AA	AA	AA	AA	AA	AA	AA	AA	AA	AA	AA	AA	AA	AA	AA	AA	AA	AA	AA	AA	AA	AA	dd	AA	AA	Ad	AA	AA	AA	AA	AA	AA
chr1D	213988001	213993500	5500	Ad	Ad	Ad	Ad	Ad	Ad	Ad	Ad	Ad	Ad	Ad	AA	Ad	Ad	AA	Ad	Ad	Ad	Ad	Ad	AA	Ad	AA	Ad	Ad	Ad	Ad	Ad	Ad	AA	AA	Ad	Ad	Ad	AA	dd	dd	Ad	Ad	Ad	Ad	Ad	Ad	Ad	Ad	Ad
chr1D	214178001	214191000	13000	AA	AA	AA	AA	AA	AA	AA	AA	AA	AA	AB	AA	AA	AA	AA	AA	AA	AA	AA	AA	AA	AA	AA	AA	AA	AA	AA	AA	AA	AA	AA	AB	AA	AA	AA	AA	dd	AA	AB	AB	AA	AA	AB	AA	AA	AA
chr1D	214376501	214380500	4000	AA	AA	AA	AB	AA	AA	AA	AB	AA	AA	AB	AA	AA	AA	AA	AA	AA	AA	AA	AA	AA	AA	AA	AA	AA	AA	AA	AA	AA	AA	AA	AB	AA	AA	AA	AA	dd	AA	AA	Ad	AA	AA	AA	AA	AA	Ad
chr1D	214385501	214395500	10000	dd	Ad	Ad	Ad	Ad	Ad	Ad	Ad	Ad	Ad	Ad	Ad	dd	Ad	Ad	Ad	Ad	Ad	Ad	Ad	Ad	Ad	Ad	Ad	Ad	Ad	Ad	Ad	dd	Ad	Ad	Ad	Ad	Ad	Ad	dd	dd	Ad	dd	dd	Ad	Ad	Ad	Ad	Ad	dd
chr1D	214732501	214751000	18500	Ad	Ad	Ad	Ad	Ad	Ad	Ad	Ad	Ad	Ad	Ad	Ad	Ad	Ad	Ad	Ad	Ad	Ad	Ad	Ad	Ad	Ad	Ad	Ad	Ad	Ad	Ad	AA	Ad	Ad	Ad	Ad	Ad	Ad	Ad	Ad	dd	Ad	Ad	Ad	Ad	Ad	Ad	Ad	Ad	Ad
chr1D	215504501	215515500	11000	AA	AA	Ad	AA	AA	AA	Ad	Ad	AA	AA	AA	Ad	AA	AA	AA	Ad	AA	AA	Ad	AA	Ad	Ad	AA	Ad	AA	AA	Ad	AB	AA	AA	AA	AA	AA	AA	Ad	dd	dd	AA	Ad	Ad	AA	Ad	Ad	Ad	Ad	Ad
chr1D	216056501	216060500	4000	AB	AA	AA	AA	AA	AA	AA	AB	AA	AA	AA	AA	AA	AA	AA	AA	AB	AA	AA	AA	AA	AA	AA	AA	AA	AA	AA	AA	AA	AA	AA	AA	AA	AA	AA	AB	dd	AA	AA	AB	AA	AA	AA	AA	AA	AA
chr1D	216081001	216096000	15000	AA	AA	AA	AA	AA	AA	AA	AA	AA	AA	AA	AA	AA	AA	AA	AA	AA	AA	AA	AA	AA	AA	AA	AA	AA	AA	AA	AA	AA	AA	AA	AA	AA	AA	AA	AB	dd	AA	AA	AA	AA	AA	Ad	AA	AA	Ad
chr1D	216962501	216968000	5500	AA	AA	AA	AA	AA	AA	AA	AA	AA	AA	AA	AA	AA	AA	AA	AA	Ad	AA	AA	AA	AA	Ad	AA	AA	AA	AA	AA	AB	AA	AA	AA	AA	AA	AA	AA	Ad	AA	AB	AA	Ad	AA	Ad	AA	AA	AA	AA
chr1D	217661501	217665500	4000	Ad	Ad	Ad	Ad	Ad	Ad	Ad	Ad	Ad	Ad	Ad	Ad	Ad	Ad	Ad	Ad	Ad	Ad	Ad	Ad	Ad	Ad	Ad	Ad	Ad	Ad	Ad	Ad	Ad	Ad	Ad	Ad	Ad	Ad	Ad	Ad	Ad	dd	Ad	Ad	Ad	Ad	Ad	Ad	Ad	Ad
chr1D	218165501	218170000	4500	Ad	dd	Ad	Ad	Ad	Ad	Ad	Ad	Ad	Ad	dd	Ad	Ad	Ad	Ad	Ad	Ad	Ad	Ad	Ad	Ad	Ad	Ad	dd	dd	Ad	Ad	Ad	Ad	Ad	Ad	Ad	dd	dd	Ad	dd	dd	Ad	dd	dd	Ad	dd	dd	dd	Ad	dd
chr1D	218205501	218211500	6000	AA	Ad	AA	Ad	Ad	Ad	Ad	AA	AA	Ad	Ad	AA	Ad	Ad	AA	Ad	Ad	AA	AA	Ad	Ad	AA	Ad	Ad	Ad	AA	Ad	AA	Ad	Ad	AA	AA	AA	AA	Ad	AA	dd	AA	AA	AA	AA	AA	Ad	AA	Ad	Ad
chr1D	218364501	218371000	6500	Ad	AA	Ad	Ad	Ad	Ad	dd	Ad	Ad	Ad	Ad	Ad	AA	AA	Ad	Ad	Ad	AA	Ad	Ad	AA	Ad	Ad	Ad	Ad	AA	Ad	Ad	Ad	Ad	Ad	AA	Ad	Ad	AA	Ad	Ad	Ad	Ad	Ad	Ad	Ad	Ad	Ad	Ad	Ad
chr1D	219908501	219924000	15500	AA	AA	Ad	AA	AA	Ad	AA	AA	Ad	AA	Ad	Ad	AA	AA	Ad	AA	AA	AA	AA	AA	Ad	AA	AA	Ad	Ad	AA	AA	AA	AA	Ad	Ad	Ad	Ad	AA	AA	Ad	dd	Ad	Ad	Ad	AA	Ad	AA	Ad	Ad	Ad
chr1D	220240001	220246000	6000	AA	AA	AA	AA	AA	AA	AA	AA	AA	AA	AA	AA	AA	AA	AA	AA	AA	AA	AA	AA	AA	AA	AA	AA	AA	Ad	AA	AA	AA	AA	AA	AA	AA	AA	Ad	Ad	dd	Ad	Ad	Ad	AA	Ad	Ad	Ad	Ad	Ad
chr1D	220479001	220483000	4000	AA	AA	AA	AA	AA	AA	AA	AA	AA	AA	AA	AA	AA	AA	AA	AA	AA	AA	AA	AA	AA	AA	AA	AA	AA	AA	AA	BB	AA	AA	AA	AA	AA	AA	AA	dd	AA	AA	AA	Ad	AA	Ad	AA	AA	AA	AA
chr1D	221616501	221620500	4000	AA	AA	AA	AA	AA	AA	AA	AB	AA	AA	AA	AA	AA	AA	AA	Ad	AA	AA	AA	AA	AA	AA	Ad	Ad	AA	AA	AA	AB	AA	AA	AB	AA	AA	AA	AA	dd	AA	AA	Ad	Ad	AA	Ad	Ad	Ad	Ad	Ad
chr1D	222184001	222196000	12000	AA	AA	AA	AA	AA	AA	AA	AA	AA	AA	AA	AA	AA	AA	AB	AA	AA	AA	AA	AA	AA	AA	AA	AA	AA	AA	AA	AA	AA	AA	AA	AA	AA	AA	AA	AA	dd	AA	AA	AA	AA	AA	AA	AA	AA	AA
chr1D	222536501	222547000	10500	AA	AA	AA	AA	AA	AA	AA	AA	AA	AA	AA	AA	AA	AA	AA	Ad	AA	AA	AA	AA	AA	AA	AA	AA	AA	AA	AA	AB	AA	AA	AA	AA	AA	AA	AA	Ad	AA	AA	AA	Ad	AA	AA	AA	AA	AA	AA
chr1D	222636001	222643000	7000	AA	AA	AA	AA	AA	AA	AA	AA	AA	AA	AA	AA	AA	AA	AA	AA	AA	AA	AA	AA	AA	AA	AA	AA	AA	AA	AA	AA	AA	AA	AA	AA	AA	AA	AA	Ad	dd	Ad	Ad	Ad	AA	Ad	Ad	Ad	AA	Ad
chr1D	222958501	222963500	5000	AA	Ad	Ad	Ad	Ad	Ad	Ad	Ad	Ad	Ad	Ad	Ad	Ad	Ad	Ad	Ad	Ad	Ad	Ad	Ad	Ad	Ad	Ad	Ad	Ad	Ad	Ad	AA	Ad	Ad	Ad	Ad	Ad	Ad	Ad	dd	Ad	Ad	Ad	Ad	Ad	Ad	Ad	Ad	Ad	Ad
chr1D	223459501	223465500	6000	AA	Ad	AA	AA	Ad	AA	AA	AA	AA	Ad	Ad	Ad	AA	AA	AA	AA	Ad	Ad	Ad	AA	AA	AA	Ad	AA	Ad	AA	Ad	AB	Ad	Ad	AA	AA	AA	AA	Ad	dd	AA	AA	AA	Ad	AA	Ad	AA	AA	Ad	AA
chr1D	223632501	223647500	15000	AA	AA	AA	AA	AA	AA	AA	AA	AA	AA	AA	AA	AA	AA	AA	AA	AA	AA	AA	AA	AA	AA	AA	AA	AA	AA	AA	AA	AA	AA	AA	AA	AA	AA	AA	AA	dd	AA	AA	AA	AA	AA	AA	AA	AA	AA
chr1D	224036501	224041000	4500	AB	AA	AA	AA	AA	AA	AB	AA	AA	AA	AA	AA	AA	AA	AA	AA	AA	AA	AA	AA	AA	AA	AA	AA	AA	AA	AA	AA	AA	AA	AA	AA	AA	AA	AA	AB	AA	AA	AA	AA	AA	AA	AA	AA	AA	AA
chr1D	224427501	224433000	5500	AA	AA	AA	AA	AA	AA	AA	AA	AA	AA	AA	AA	AA	AA	AA	AA	AA	AA	AA	AA	dd	AA	AA	AA	AA	AA	AA	AA	AA	AA	AA	AA	Ad	AA	AA	AA	AA	AB	AA	AA	AA	AA	AA	AA	AA	BB
chr1D	224444501	224449000	4500	AB	AB	AA	AA	AA	AA	AA	AA	AA	AA	AA	AA	AA	AA	AA	AA	AA	AA	AA	AA	AA	AA	AA	AA	AA	AA	AA	AB	AA	AA	AA	AA	AA	AB	AB	Ad	dd	AA	AA	Ad	AA	AA	AA	AA	AA	AA
chr1D	224497501	224503500	6000	Ad	AA	AA	AA	AA	AA	AA	AA	AA	AA	AA	AA	AA	AA	AA	AA	AA	AA	AA	AA	AA	AA	AA	AA	AA	AA	AA	AB	AA	AA	AA	AA	AA	AB	AB	Ad	dd	AA	AA	Ad	AA	Ad	AA	AA	AA	AA
chr1D	224660501	224667000	6500	AA	Ad	AA	Ad	AA	Ad	AA	AA	AA	AA	AA	AA	Ad	Ad	AA	AA	AA	AA	Ad	AA	Ad	AA	Ad	AA	Ad	AA	Ad	Ad	AA	AA	Ad	Ad	AA	AA	AA	Ad	dd	Ad	Ad	Ad	Ad	Ad	Ad	Ad	Ad	Ad
chr1D	224726001	224732500	6500	AA	AA	AA	AA	AA	AA	AA	AA	AA	AA	AA	AA	AA	AA	AA	AA	AA	AA	AA	AA	AA	AA	AA	AA	AA	AA	AA	AA	AA	AA	AA	AA	AA	AA	AA	AA	Ad	AA	AA	AA	AA	AA	AA	AA	AA	AA
chr1D	224756501	224760500	4000	AB	AA	AB	AA	AB	AB	AB	AB	AB	AB	AB	AA	AA	AA	AA	AA	AA	AA	AA	AB	AB	AA	AB	AB	AB	AB	AB	AB	AB	AA	AB	AA	AB	AB	AA	AB	AA	BC	AA	AA	AB	AA	AA	AB	AB	AA
chr1D	225164501	225170500	6000	AA	AA	AA	AA	AA	AA	AA	AA	AA	AA	AA	AA	AA	AA	AA	AA	AA	AA	AA	AA	AA	AA	AA	AA	AA	AA	AA	AA	AA	AA	AA	AA	AA	AA	AA	AA	dd	Ad	AA	AA	AA	AA	AA	AA	AA	AA
chr1D	225504001	225508000	4000	AB	AA	AA	AA	AA	AA	AB	AA	AB	AA	AA	AA	AA	AA	AA	AA	AA	AA	AA	AA	AA	AA	AA	AA	AA	AA	AA	Ad	AA	AA	AA	AA	AA	Ad	AA	AA	dd	AA	AA	AA	AA	AA	AB	AA	AA	AB
chr1D	225737001	225741500	4500	AA	AA	AA	AA	AA	AA	AA	AA	AA	AA	AA	AA	AA	AA	AA	AA	AA	AA	AA	AA	AA	AA	AA	Ad	Ad	Ad	AA	AA	AA	AA	AA	AA	AA	AA	AA	AA	dd	Ad	AA	AA	AA	Ad	AA	AA	Ad	AA
chr1D	226007001	226011000	4000	AA	AA	AA	Ad	AA	AA	AA	AA	AA	AA	AA	AA	AA	AA	AA	AA	AA	Ad	AA	AA	AA	Ad	AA	AA	AA	AA	Ad	AA	AA	AA	AA	AA	AA	AA	AA	Ad	dd	Ad	Ad	Ad	AA	Ad	Ad	AA	Ad	Ad
chr1D	226123001	226132500	9500	Ad	Ad	Ad	Ad	Ad	Ad	AA	Ad	Ad	Ad	Ad	Ad	Ad	Ad	Ad	Ad	Ad	Ad	Ad	Ad	Ad	Ad	Ad	Ad	Ad	Ad	Ad	Ad	Ad	Ad	Ad	Ad	Ad	Ad	Ad	Ad	dd	Ad	Ad	Ad	Ad	Ad	Ad	Ad	Ad	Ad
chr1D	226504001	226508500	4500	dd	dd	Ad	Ad	Ad	dd	dd	Ad	dd	dd	Ad	Ad	Ad	dd	Ad	Ad	Ad	dd	Ad	Ad	Ad	Ad	Ad	Ad	dd	dd	Ad	Ad	dd	Ad	dd	Ad	Ad	Ad	Ad	dd	dd	Ad	dd	dd	Ad	dd	dd	dd	dd	dd
chr1D	226648501	226652500	4000	Ad	Ad	Ad	Ad	Ad	Ad	Ad	dd	dd	Ad	dd	dd	Ad	Ad	Ad	Ad	dd	Ad	dd	dd	Ad	dd	Ad	Ad	Ad	Ad	dd	Ad	Ad	Ad	Ad	Ad	Ad	Ad	Ad	dd	Ad	Ad	Ad	dd	AA	Ad	Ad	Ad	Ad	dd
chr1D	227105001	227110000	5000	AA	AA	AA	AA	AA	AA	AA	AA	AA	AA	AA	AA	AA	Ad	AA	AA	AA	AA	AA	AA	AA	AA	AA	AA	AA	AA	AA	AA	AA	AA	AA	AA	AA	AA	AA	Ad	dd	AA	AA	AA	AA	AA	AA	AA	AA	AA
chr1D	228082001	228089000	7000	AA	AA	AA	AA	dd	AA	AA	AA	AA	AA	AA	AA	AA	AA	AA	AA	AA	dd	AA	AA	AA	AA	AA	AA	AA	AA	AA	AA	AA	AA	AA	AA	dd	AA	AA	dd	dd	dd	AA	Ad	AA	AA	AA	AA	AA	AA
chr1D	228265501	228269500	4000	AA	AA	AA	AA	AA	AA	AA	AA	AA	AA	AA	AA	AA	AA	AA	AA	AA	AA	AA	Ad	AA	AA	AA	Ad	AA	AA	AA	AA	AA	AA	Ad	AA	AA	AA	AA	AA	dd	Ad	Ad	Ad	AA	AA	Ad	AA	AA	AA
chr1D	228621001	228625500	4500	dd	Ad	dd	Ad	Ad	Ad	Ad	Ad	Ad	Ad	Ad	Ad	dd	Ad	Ad	Ad	Ad	Ad	Ad	Ad	Ad	Ad	Ad	Ad	Ad	dd	Ad	Ad	dd	Ad	Ad	Ad	Ad	Ad	AA	dd	dd	dd	Ad	Ad	Ad	dd	dd	Ad	Ad	dd
chr1D	228621001	228632000	11000	dd	Ad	Ad	Ad	Ad	Ad	Ad	Ad	Ad	Ad	Ad	Ad	Ad	Ad	Ad	Ad	Ad	Ad	Ad	Ad	Ad	Ad	Ad	Ad	Ad	Ad	Ad	Ad	Ad	Ad	Ad	dd	Ad	Ad	Ad	dd	dd	dd	Ad	dd	Ad	dd	dd	dd	dd	dd
chr1D	228628001	228632000	4000	dd	dd	Ad	Ad	Ad	Ad	Ad	dd	Ad	dd	Ad	Ad	Ad	Ad	Ad	Ad	dd	Ad	dd	dd	dd	Ad	Ad	dd	dd	Ad	Ad	Ad	Ad	dd	Ad	dd	dd	dd	Ad	dd	dd	dd	dd	dd	dd	dd	dd	dd	dd	dd
chr1D	228816501	228823000	6500	Ad	Ad	Ad	Ad	Ad	AA	Ad	Ad	Ad	Ad	Ad	AA	Ad	Ad	Ad	Ad	Ad	Ad	Ad	Ad	Ad	Ad	Ad	AA	Ad	Ad	Ad	AB	Ad	Ad	Ad	Ad	Ad	Ad	Ad	Ad	dd	AA	AA	Ad	AA	Ad	Ad	AA	Ad	AA
chr1D	228905501	228909500	4000	Ad	Ad	Ad	Ad	Ad	Ad	Ad	Ad	Ad	dd	dd	Ad	Ad	Ad	Ad	dd	Ad	Ad	Ad	Ad	Ad	Ad	Ad	Ad	Ad	Ad	Ad	dd	Ad	Ad	AA	Ad	dd	dd	dd	dd	dd	dd	Ad	dd	Ad	Ad	dd	Ad	Ad	dd
chr1D	229050501	229054500	4000	Ad	dd	Ad	Ad	Ad	Ad	dd	dd	dd	dd	Ad	dd	Ad	dd	Ad	dd	dd	dd	dd	dd	dd	Ad	Ad	Ad	Ad	dd	dd	Ad	Ad	Ad	Ad	Ad	Ad	dd	dd	Ad	Ad	Ad	Ad	Ad	Ad	dd	Ad	dd	dd	Ad
chr1D	229274001	229280000	6000	AA	AA	AA	AA	AA	AA	Ad	AA	AA	AA	AA	AA	AA	AA	AA	AA	AA	AA	AA	AA	AA	AA	Ad	AA	AA	AA	AA	AA	Ad	AA	AA	AA	AA	AA	AA	AB	AA	AA	AA	AA	AA	AA	AB	AA	AA	AB
chr1D	229594501	229599500	5000	AA	Ad	AA	AA	dd	AA	AA	dd	AA	AB	AA	AA	AA	AA	dd	AA	AB	AA	AA	AA	dd	AA	AA	Ad	dd	AA	dd	Ad	AA	AA	AA	AA	AA	AA	AB	AA	AA	AB	dd	AA	AA	AA	AA	AA	AA	AA
chr1D	229891001	229896500	5500	AA	AA	AA	AA	AA	AA	AA	AA	AA	AA	AA	AA	AA	AA	AA	AA	AA	AA	AA	AA	AA	AA	AA	AA	AA	Ad	AA	AA	AA	AA	AA	AA	AA	AA	AA	Ad	dd	Ad	AA	AA	AA	AA	Ad	AA	AA	AA
chr1D	229984501	229991000	6500	AA	AA	AA	AA	AA	AA	AA	AA	AA	AA	AA	Ad	AA	AA	Ad	AA	Ad	AA	AA	AA	AA	AA	AA	Ad	AA	AA	AA	AB	AA	AA	AA	AA	AA	AA	AA	dd	dd	AA	Ad	Ad	AA	Ad	Ad	Ad	Ad	Ad
chr1D	230281001	230285500	4500	AA	AA	Ad	Ad	Ad	AA	AA	AA	AA	AA	AA	AA	Ad	AA	AA	AA	Ad	Ad	Ad	Ad	Ad	Ad	Ad	Ad	Ad	Ad	AA	AB	AA	AA	AA	Ad	AA	AA	AA	dd	AA	AA	Ad	Ad	AA	Ad	Ad	Ad	Ad	Ad
chr1D	230306001	230311500	5500	AA	AA	AA	AA	AA	AA	AA	AA	AA	AB	AA	AA	AA	AA	AA	AA	AA	AA	AA	AA	AA	AA	AA	AA	AA	AA	AA	AA	AA	AA	AA	AA	AA	AA	AA	AA	AA	AB	AA	AA	AA	AA	AA	AA	AB	AA
chr1D	230433501	230439000	5500	Ad	Ad	Ad	Ad	Ad	AA	Ad	Ad	Ad	Ad	Ad	Ad	AA	Ad	Ad	Ad	Ad	Ad	Ad	Ad	Ad	Ad	Ad	Ad	Ad	Ad	Ad	AA	Ad	Ad	Ad	Ad	Ad	Ad	Ad	dd	dd	Ad	Ad	Ad	AA	Ad	Ad	Ad	Ad	Ad
chr1D	230443501	230450500	7000	Ad	Ad	Ad	Ad	Ad	Ad	Ad	Ad	AA	Ad	Ad	Ad	AA	Ad	Ad	Ad	Ad	Ad	Ad	Ad	Ad	Ad	Ad	Ad	Ad	Ad	Ad	BB	Ad	Ad	Ad	Ad	Ad	Ad	Ad	Ad	Ad	Ad	Ad	Ad	AA	Ad	Ad	Ad	Ad	Ad
chr1D	230453501	230458500	5000	dd	Ad	Ad	Ad	Ad	Ad	Ad	Ad	Ad	Ad	Ad	Ad	Ad	Ad	Ad	Ad	Ad	Ad	Ad	Ad	Ad	Ad	dd	Ad	Ad	Ad	Ad	Ad	Ad	Ad	Ad	dd	Ad	dd	Ad	dd	dd	Ad	Ad	dd	Ad	Ad	Ad	Ad	dd	Ad
chr1D	230750501	230755000	4500	Ad	AA	Ad	Ad	AA	Ad	Ad	Ad	Ad	Ad	Ad	Ad	Ad	Ad	Ad	AA	Ad	Ad	Ad	Ad	AA	Ad	AA	Ad	Ad	Ad	Ad	AB	Ad	Ad	Ad	Ad	Ad	Ad	Ad	dd	AB	AB	AA	Ad	AA	AA	Ad	AA	Ad	Ad
chr1D	231189001	231198500	9500	AA	AA	dd	AA	AA	AA	AA	AA	AA	AA	AA	AA	AA	AA	AA	AA	AA	AA	AA	AA	AA	AA	AA	AA	AA	AA	AA	AB	AA	AA	AA	AB	AA	AA	AA	AA	AA	AA	AA	AA	AA	AA	AB	AA	AA	AB
chr1D	231336001	231341000	5000	AA	AA	AA	AA	AA	AA	AA	Ad	AA	AA	AA	AB	AB	AA	AA	AA	AA	AA	AB	AA	AA	AA	AA	AA	AA	AA	AA	AB	AA	AA	AA	AA	AA	AA	AA	AA	dd	AA	AA	AB	AA	AA	AA	AA	AA	AA
chr1D	231866001	231903000	37000	AA	AA	AA	AA	AA	AA	AA	AA	AA	AA	AA	AA	AA	AA	AA	AA	AA	AA	AA	AA	AA	AA	AA	AA	AA	AA	AA	AA	AA	AA	AA	AA	AA	AA	AA	AA	dd	AA	AA	AA	AA	AA	AB	AA	AA	AA
chr1D	232169501	232173500	4000	AA	AA	AA	AA	Ad	Ad	AA	AA	AA	AA	AA	AA	AA	AA	AA	AA	AA	AA	AA	AA	AA	AA	AA	AA	AA	AA	AA	AA	Ad	AA	Ad	AA	AA	AA	Ad	Ad	Ad	Ad	Ad	AA	AA	Ad	Ad	Ad	Ad	Ad
chr1D	232968001	232976000	8000	AA	AA	AA	AA	AA	AA	AB	AA	AB	AA	AA	AA	AA	AA	AA	AA	AA	AB	AA	AA	AA	AA	AA	AA	AA	AA	AA	AA	AA	AA	AB	AA	AA	AA	AA	AA	dd	AB	AA	AA	AA	AA	AA	AA	AB	AA
chr1D	234413001	234417000	4000	AA	AA	AA	AA	AA	AA	AA	Ad	AA	AA	AA	Ad	AA	AA	AA	AB	AA	AA	AA	AA	AA	AA	AA	AA	AA	AA	AA	AA	AA	AB	AA	AA	AA	AA	AA	AB	dd	AA	AA	AA	AA	AA	AA	AA	AA	AA
chr1D	235254501	235258500	4000	AB	AB	AB	AB	AA	AB	AB	AB	dd	AB	AB	AB	AB	dd	AB	AB	AB	AB	dd	AB	AB	dd	dd	AB	AB	AA	AA	AB	AA	AB	AA	dd	AA	AB	AB	BB	AA	AB	AB	AB	AB	AB	BC	AB	AB	AB
chr1D	235596001	235600000	4000	Ad	AA	AA	Ad	AA	AA	Ad	Ad	AA	Ad	Ad	Ad	Ad	Ad	AA	Ad	Ad	Ad	Ad	Ad	Ad	Ad	AA	Ad	Ad	Ad	Ad	Ad	AA	Ad	Ad	AA	Ad	Ad	Ad	Ad	dd	AA	Ad	Ad	AA	Ad	Ad	Ad	Ad	Ad
chr1D	235622501	235626500	4000	Ad	Ad	Ad	Ad	Ad	Ad	Ad	Ad	Ad	Ad	Ad	Ad	Ad	Ad	dd	Ad	Ad	Ad	Ad	Ad	Ad	Ad	Ad	Ad	Ad	Ad	Ad	Ad	Ad	Ad	Ad	Ad	Ad	Ad	Ad	Ad	dd	Ad	Ad	dd	Ad	Ad	Ad	Ad	Ad	Ad
chr1D	235623001	235636000	13000	Ad	Ad	Ad	Ad	Ad	Ad	Ad	Ad	Ad	Ad	Ad	Ad	Ad	Ad	Ad	Ad	Ad	Ad	Ad	Ad	Ad	Ad	Ad	Ad	Ad	Ad	Ad	Ad	Ad	Ad	Ad	Ad	Ad	Ad	Ad	Ad	dd	Ad	Ad	Ad	Ad	Ad	Ad	Ad	Ad	Ad
chr1D	235633001	235637000	4000	Ad	Ad	Ad	Ad	AA	Ad	Ad	Ad	Ad	dd	dd	Ad	Ad	Ad	dd	Ad	Ad	Ad	Ad	Ad	Ad	Ad	dd	Ad	Ad	Ad	Ad	Ad	Ad	Ad	Ad	dd	Ad	Ad	Ad	dd	dd	dd	dd	dd	Ad	dd	Ad	dd	Ad	dd
chr1D	235935001	235939500	4500	AA	AA	AA	AA	AA	AA	AA	AA	AA	AA	AA	AA	AA	AA	AA	AA	AA	AA	AA	AA	AA	AA	AA	AA	AA	AA	Ad	AA	AA	AA	AA	AA	AA	AA	AA	Ad	AA	AA	AA	AA	AA	AA	AA	AA	AA	AA
chr1D	236487001	236492000	5000	Ad	Ad	Ad	Ad	Ad	Ad	dd	Ad	Ad	Ad	Ad	Ad	Ad	Ad	Ad	Ad	Ad	Ad	Ad	Ad	Ad	Ad	Ad	Ad	Ad	Ad	Ad	Ad	Ad	Ad	Ad	Ad	Ad	Ad	Ad	Ad	Ad	Ad	dd	dd	Ad	dd	dd	dd	dd	Ad
chr1D	236491001	236495000	4000	AA	Ad	Ad	AA	AA	AA	dd	Ad	Ad	Ad	AA	AA	Ad	Ad	Ad	AA	AA	Ad	AA	Ad	Ad	Ad	AA	Ad	Ad	Ad	AA	Ad	Ad	Ad	Ad	Ad	Ad	Ad	AA	dd	Ad	Ad	Ad	Ad	Ad	Ad	Ad	Ad	Ad	Ad
chr1D	237017501	237030500	13000	AA	AA	AA	AA	AA	AA	dd	AA	AA	AA	AA	AA	AA	AA	AA	AA	AA	AA	AA	AA	AA	AA	AA	AA	AA	AA	AA	AB	AA	AA	AA	AA	AA	AA	AA	Ad	AA	AB	AA	AA	AA	AA	AA	AA	AA	AA
chr1D	237988501	237994500	6000	AA	AA	AA	AA	AA	AA	AA	AA	AA	AA	AA	AA	AA	AA	AA	AA	AA	AA	AA	AA	AA	AA	AA	AA	AA	AA	AA	AA	AA	AA	AA	AA	AA	AA	AA	AA	Ad	Ad	AA	AA	AA	AA	AA	AA	Ad	AA
chr1D	238192001	238213500	21500	AA	AA	AA	AA	AA	AA	AA	AA	AA	AA	AA	AB	AA	AA	AA	AA	AA	AA	AA	AA	AA	AA	AA	AA	AA	AA	AA	AA	AA	AA	AA	AA	AA	AA	AA	AB	dd	AA	AA	AA	AA	AA	AA	AA	AA	AA
chr1D	238209501	238213500	4000	AA	AA	AB	AA	AA	AA	AA	AA	AA	AA	AB	AB	AA	AA	AA	AB	AB	AA	AA	AB	AA	AA	AA	AA	AA	AA	AA	AA	AA	AA	AA	AA	AA	AB	AA	AB	dd	AB	AA	AA	AA	AA	AB	AA	AA	AA
chr1D	238539501	238557000	17500	AA	AA	AA	Ad	AA	AA	AA	AA	AA	AA	Ad	AA	AA	AA	AA	AA	Ad	AA	AA	AA	AA	Ad	AA	AA	AA	AA	AA	AA	AA	AA	AA	AA	AA	AA	AA	Ad	AA	Ad	AA	AA	AA	AA	AA	dd	Ad	AA
chr1D	238955501	238961000	5500	AA	AB	AA	AB	dd	AA	AA	AA	AA	AB	AA	AA	AB	AB	AA	AA	AA	AA	AA	AA	AA	AA	AA	AA	AA	AA	AA	AA	AA	AA	AA	AA	AB	AA	AA	AA	AA	AA	AA	AA	AA	AA	AA	AA	AA	AB
chr1D	239882001	239886500	4500	AA	AA	AA	AA	AA	AA	AA	AA	AA	AA	AA	AA	AA	AA	AA	AA	AA	AA	AA	Ad	AA	AA	AB	AA	AA	AA	AA	AB	Ad	AA	AA	AA	AA	AA	AA	dd	AA	AB	AA	Ad	AA	AA	AA	AA	AA	AA
chr1D	240309501	240314000	4500	AA	AA	AA	AA	AA	AA	AA	AA	AA	Ad	AA	AA	AA	AA	AA	AA	AA	AA	AA	AA	AA	AA	AA	AA	AA	AA	AA	AB	AA	AA	AA	AA	AA	AA	AA	dd	AA	AA	Ad	Ad	AA	AA	AA	AA	AA	AA
chr1D	241196501	241201000	4500	Ad	Ad	AA	AA	AA	AA	AA	AA	Ad	AA	AA	AA	AA	AA	Ad	AA	AA	AA	Ad	AA	AA	AA	AA	AA	Ad	AA	AA	Ad	AA	AA	AA	AA	AA	AA	AA	Ad	dd	Ad	Ad	Ad	AA	Ad	Ad	Ad	Ad	Ad
chr1D	241788501	241815500	27000	AA	AA	AA	AA	AA	AA	AA	AA	AA	AA	AA	AA	AA	AA	AA	AA	AA	AA	AA	AA	AA	AA	AA	AA	AA	AA	AA	AA	AA	AA	AA	AA	AA	AA	AA	AA	AA	AA	AA	AA	AA	AA	AA	AA	AA	AA
chr1D	241985501	241989500	4000	AB	AB	AA	AA	AA	AA	AA	AA	AA	AA	AA	AA	AA	AA	AA	AB	AA	AA	AA	AB	AB	AA	AB	AA	AB	AA	AB	AA	AA	AA	AB	AB	AA	AA	AA	AB	dd	AA	AA	AB	AA	AA	Ad	AA	AA	AA
chr1D	242262001	242268500	6500	AA	AA	AA	AA	AA	AB	AA	AA	AA	AB	AA	AA	AA	AA	AA	AA	AA	AA	AA	AA	AA	AA	AA	AA	AA	dd	AA	AB	AA	AA	AA	AA	AA	AA	AA	Ad	AA	AB	AA	Ad	AA	AA	AA	AA	AA	AA
chr1D	242711001	242723000	12000	AA	AA	AA	AA	AA	AA	AA	AA	AA	AA	AB	AA	AA	AA	AA	AA	AA	AA	AA	AA	AA	AA	AB	AA	AA	AA	AA	AA	AA	AA	AA	AA	AA	AA	AA	AA	AA	AB	AA	AA	AA	AA	AB	AA	AA	AA
chr1D	242730001	242735500	5500	AA	AA	AA	AA	AA	AA	AA	AA	AA	AA	AA	AA	AA	AA	AA	AA	AA	AA	AA	AA	AA	AA	AA	AA	AA	AA	AA	AA	AA	AA	AA	AA	AA	AA	AA	AA	AA	AA	AA	AA	AA	AA	AA	AA	AA	AA
chr1D	242934501	242939500	5000	AA	Ad	AA	AA	AA	AA	dd	AA	AA	AA	AA	AA	AA	AA	AA	AA	AA	AA	AA	AA	AA	AA	AA	AA	AA	AA	AA	AA	AA	AA	Ad	AA	AA	Ad	AA	AA	AA	AA	AA	AA	AA	AA	AB	AA	AA	AB
chr1D	243592501	243620000	27500	AA	AA	AA	AA	AA	AA	AA	AA	AA	AA	AA	AA	AA	AA	AA	AA	AA	AA	AA	AA	AA	AA	AA	AA	AA	AA	AA	AA	AA	AA	AA	AA	AA	AA	AA	AA	dd	AA	AA	AA	AA	AA	AA	AA	AA	AA
chr1D	243631501	243864000	232500	AA	AA	AA	AA	AA	AA	AA	AA	AA	AA	AA	AA	AA	AA	AA	AA	AA	AA	AA	AA	AA	AA	AA	AA	AA	AA	AA	AA	AA	AA	AA	AA	AA	AA	AA	AA	dd	AA	AA	AA	AA	AA	AA	AA	AA	AA
chr1D	244411001	244416000	5000	AA	AB	AB	AA	AA	AA	AA	AA	AA	AA	AA	AA	AA	AA	AA	AA	AA	AA	AA	AA	AB	AA	AA	AA	AA	AA	AA	AB	AA	AA	AA	AB	AA	AA	AB	AB	AA	AB	AB	AB	AA	AA	AA	AB	AA	AB
chr1D	244425001	244430500	5500	AB	AA	AB	AA	AB	AA	AB	AA	AB	AB	AA	AB	AA	dd	AA	AB	AA	AB	AA	AB	AB	AB	AA	AA	AB	AA	AA	BB	AA	AA	AA	AB	AA	AA	AB	AB	dd	AB	AA	AB	AA	AB	AA	AB	AA	AB
chr1D	244432501	244439000	6500	AA	AA	AA	AA	AA	AA	AA	AA	AA	AA	AA	AA	AA	dd	AA	AA	AA	AA	AA	AA	AA	AA	AA	AA	AA	AA	AA	AA	AA	AA	AA	AA	AA	AA	AA	AA	Ad	AB	AA	AA	AA	AA	AA	AA	AA	AA
chr1D	244699501	244706500	7000	AA	AA	AA	AA	AA	AA	AA	AA	AA	AA	AA	AA	AA	AA	AA	AA	AA	AA	AA	AA	AA	AA	AA	AA	AA	AA	AA	AA	AA	AA	AA	AA	AA	AA	AA	AA	AA	AA	AA	AA	AA	AA	AB	AA	AA	AB
chr1D	244930001	244937500	7500	AA	AA	AA	AA	AA	AA	AA	AA	AA	AA	AA	AA	AA	AA	AA	AA	AA	AA	AA	AA	AA	AA	AA	AA	AA	AA	AA	AA	AA	AA	AA	AA	AA	AA	AA	AA	dd	AA	AA	AA	AA	AA	AB	AA	AA	AB
chr1D	245231001	245247000	16000	AA	AA	AA	AA	AA	AA	AA	AA	AA	AA	AA	AA	AA	AA	AA	AA	AA	AA	AA	AA	AA	AA	AA	AA	AA	AA	AA	AA	AA	AA	AA	AA	AA	AA	AA	AB	dd	AA	AA	AA	AA	AA	AA	AA	AA	AA
chr1D	245343001	245347500	4500	dd	dd	dd	dd	dd	dd	dd	dd	dd	dd	dd	dd	dd	dd	dd	dd	dd	dd	dd	dd	dd	dd	dd	dd	dd	dd	dd	dd	dd	dd	dd	dd	dd	dd	dd	dd	dd	dd	dd	dd	dd	dd	dd	dd	dd	dd
chr1D	246310501	246316000	5500	Ad	Ad	Ad	Ad	Ad	Ad	Ad	Ad	dd	dd	dd	Ad	Ad	Ad	dd	Ad	Ad	dd	Ad	Ad	dd	Ad	Ad	Ad	Ad	Ad	Ad	Ad	Ad	dd	Ad	Ad	Ad	Ad	Ad	dd	Ad	dd	dd	dd	Ad	dd	Ad	dd	dd	dd
chr1D	246635501	246640000	4500	AA	Ad	AA	AA	AA	AA	AA	AA	AA	Ad	Ad	Ad	AA	AA	AA	AA	Ad	AA	AA	Ad	AA	AA	AA	AA	AA	AA	AA	AB	AA	AA	AA	AA	AA	AA	AA	dd	AA	AA	AA	Ad	AA	AA	AA	AA	AA	AA
chr1D	246821001	246825500	4500	AB	AA	AA	AA	AA	AA	AA	AA	AB	AA	AA	AB	AA	AB	AA	AA	AA	AA	AA	AA	AA	AB	AA	AA	AA	AB	AA	AA	AA	AA	AA	AA	AA	AB	AA	AB	dd	AA	AA	AA	AA	AA	Ad	AA	AA	Ad
chr1D	247095001	247105000	10000	AA	AA	AA	AA	AA	AA	AA	AA	AA	AA	AA	dd	dd	AA	AA	AA	dd	AA	AA	AA	AA	AA	AB	AA	AA	AA	AA	AA	AA	AA	AA	AB	AA	AA	AA	AB	AA	AA	AA	dd	AA	dd	dd	AA	AA	AA
chr1D	247177001	247181500	4500	AA	AB	AA	AA	AA	AA	AA	AA	AA	AA	AA	AA	AA	AA	AA	AA	AA	AA	AA	AA	AA	AA	AA	AA	AA	AA	AA	Ad	AA	AA	Ad	dd	AB	AA	AA	AA	AA	AA	AA	AA	AA	AA	AA	AA	AA	AA
chr1D	247497501	247504500	7000	AA	AA	AA	AA	AA	AA	dd	AA	AA	AA	AA	AA	AA	AA	AA	AA	AA	AA	AA	AA	AA	AA	AA	AA	AA	AA	AA	AB	AA	AA	AA	AA	AA	AA	AA	Ad	AA	AB	AA	AA	AA	AA	AA	AA	AA	AA
chr1D	248798001	248802000	4000	AB	Ad	AA	AA	AA	AA	AB	AA	AA	AA	AA	AB	AA	AA	dd	AA	AA	AA	AA	AB	AA	AA	AA	AA	AA	AA	AB	AA	AB	AB	AB	AA	AA	AA	AA	AA	AA	AA	dd	AA	AA	AA	AA	AA	AA	AB
chr1D	249042001	249046000	4000	AA	AA	AA	AA	AA	AA	AA	AA	AA	AA	AA	AA	AA	AA	AA	AA	AA	AA	AA	AA	AA	AA	Ad	AA	AA	AA	Ad	Ad	AA	AA	AA	AA	AA	AA	AA	AB	dd	Ad	Ad	AA	AA	AA	Ad	Ad	Ad	Ad
chr1D	250017001	250021000	4000	AA	AA	AA	AA	AA	AA	AA	AA	AA	AA	Ad	AA	AA	AA	AA	AA	AA	AA	AA	AA	AA	AA	AA	AA	AA	AA	AA	AA	AA	AA	AA	AA	AA	AA	AA	Ad	dd	AA	AA	Ad	AA	Ad	AA	AA	AA	AA
chr1D	250024501	250028500	4000	AA	AA	AB	AA	AB	AB	Ad	AA	AA	AA	AA	AA	AA	AA	AB	AA	AA	AA	AA	AA	AA	AA	AA	AA	AA	AA	AA	AA	AA	AA	AA	Ad	Ad	AA	AA	AB	dd	AA	Ad	AA	AA	AA	Ad	AA	AA	AA
chr1D	250037001	250042000	5000	AA	AA	Ad	AA	AA	AA	AA	AA	AA	AA	AA	AA	AA	AA	AA	AA	AA	AA	AA	AA	AA	AA	AA	AA	AA	AA	AA	AB	AA	AA	AA	AA	AA	AB	AA	dd	Ad	AA	Ad	Ad	AA	Ad	Ad	Ad	Ad	Ad
chr1D	250156501	250162500	6000	dd	AA	AA	AA	AA	AA	Ad	Ad	AA	AA	AA	AA	AA	AA	AA	AA	Ad	AA	AA	AA	AA	AA	AA	AA	AA	AA	AA	Ad	Ad	AA	AA	AA	AA	AA	AA	AA	AA	Ad	Ad	AA	AA	AA	AA	Ad	AA	AA
chr1D	250675001	250680000	5000	AA	AA	AA	AA	AB	AA	AA	AA	AA	AA	AB	AA	AA	AA	AA	AA	AA	AA	AA	AA	AA	AB	AA	AA	AA	AA	AA	AA	AA	AA	AB	AA	AA	AA	AA	AA	AA	AA	AA	AB	AA	AA	AA	AA	AA	AB
chr1D	250775501	250789000	13500	dd	dd	dd	dd	dd	dd	dd	dd	dd	dd	dd	dd	dd	dd	dd	dd	dd	dd	dd	dd	dd	dd	dd	dd	dd	dd	dd	dd	dd	dd	dd	dd	dd	dd	dd	dd	dd	dd	dd	dd	dd	dd	dd	dd	dd	dd
chr1D	250785501	250790000	4500	dd	dd	dd	dd	dd	dd	dd	dd	dd	dd	dd	dd	dd	dd	dd	dd	dd	dd	dd	dd	dd	dd	dd	dd	dd	dd	dd	dd	dd	dd	dd	dd	dd	dd	dd	dd	dd	dd	dd	dd	dd	dd	dd	dd	dd	dd
chr1D	251047501	251056500	9000	AA	AA	AA	AA	AA	AA	AA	AA	AA	AA	AA	AA	AA	AA	AA	AA	AA	AA	AA	AA	AA	AA	AA	AA	dd	AA	AA	AA	AA	AA	AA	AA	AA	AA	AA	Ad	AA	AA	AA	AA	AA	AA	AA	AA	AA	AA
chr1D	251259501	251264000	4500	AA	Ad	AA	AA	AA	AA	AA	AA	AA	AA	AA	Ad	Ad	AA	AA	Ad	Ad	AA	AA	AA	AA	Ad	AA	AA	Ad	AA	AA	AA	AA	Ad	AA	AA	AA	AA	Ad	AA	AA	Ad	Ad	AA	AA	Ad	Ad	Ad	Ad	Ad
chr1D	251373001	251378500	5500	Ad	Ad	Ad	Ad	Ad	Ad	Ad	Ad	Ad	dd	Ad	Ad	Ad	Ad	Ad	Ad	Ad	Ad	Ad	Ad	Ad	Ad	Ad	Ad	Ad	Ad	Ad	Ad	Ad	Ad	Ad	Ad	Ad	Ad	Ad	Ad	dd	Ad	Ad	Ad	Ad	Ad	Ad	Ad	Ad	dd
chr1D	251395501	251401000	5500	AA	AA	AA	AA	AA	AA	AA	AA	AA	AA	AA	AA	AA	AA	AA	AA	AA	AA	AA	AA	AA	AB	AA	AA	AA	AA	AA	AA	AA	AA	AA	AA	AA	AA	AA	AB	AA	AA	AA	AA	AA	AA	AA	AA	AA	AB
chr1D	251405501	251409500	4000	AA	AB	AA	AA	AA	AA	AB	AA	AA	AA	AA	AA	AA	AA	AA	AB	AA	AA	AA	AB	AA	AB	AA	AA	AA	AB	AB	AA	AA	AA	AA	AA	AA	AA	AB	BB	dd	AA	AA	AA	AA	AA	AA	AA	AA	AB
chr1D	251523001	251531500	8500	Ad	AA	AA	AA	Ad	Ad	AA	AA	Ad	Ad	AA	AA	AA	Ad	Ad	AA	AA	AA	AA	Ad	Ad	AA	AA	AA	AA	AA	AA	AA	AA	Ad	AA	AA	AA	AA	AA	Ad	dd	Ad	Ad	Ad	AA	Ad	Ad	Ad	Ad	Ad
chr1D	251564501	251573500	9000	AA	AA	AA	Ad	AA	AA	Ad	AA	AA	AA	AA	AA	Ad	AA	AA	AA	AA	AA	AA	AA	Ad	AA	AA	AA	AA	AA	AA	AA	AA	AA	AA	AA	AA	AA	AA	AA	dd	AA	AA	AA	AA	Ad	Ad	AA	Ad	AA
chr1D	251952001	251966000	14000	dd	dd	dd	dd	dd	dd	dd	dd	dd	dd	dd	dd	dd	dd	dd	dd	dd	dd	dd	dd	dd	dd	dd	dd	dd	dd	dd	dd	dd	dd	dd	dd	dd	dd	dd	dd	dd	dd	dd	dd	dd	dd	dd	dd	dd	dd
chr1D	252551501	252556500	5000	AA	AA	AA	AA	AA	AA	AA	AA	AA	AA	AA	AA	AA	AA	AA	AA	AA	AA	AA	AA	Ad	AA	AA	AA	AA	AA	AA	AA	Ad	AA	AA	AA	AA	AA	AA	AA	AA	Ad	AA	AA	AA	AA	AA	AA	AA	AA
chr1D	252578501	252582500	4000	Ad	AA	Ad	Ad	Ad	AA	Ad	Ad	Ad	AA	Ad	AA	Ad	AA	Ad	AA	Ad	AA	AA	Ad	Ad	Ad	AA	Ad	AA	Ad	Ad	AA	AA	Ad	Ad	AA	Ad	Ad	Ad	Ad	dd	Ad	Ad	Ad	AA	Ad	Ad	Ad	Ad	Ad
chr1D	252793501	252810000	16500	AA	AA	AA	AA	AA	AA	AA	AA	AA	AA	AA	AA	AA	AA	AA	AA	AA	AA	AA	AA	AA	AA	AA	AA	AA	AA	AA	AB	AA	AA	AA	AA	AA	AA	AA	Ad	dd	AA	AA	AA	AA	AA	AA	AA	AA	AA
chr1D	252947001	252951000	4000	AA	AA	AA	AB	AA	Ad	AA	AA	AA	AA	AA	AA	AA	AA	AA	AA	AB	AA	AA	AA	AA	AA	AA	AA	AA	AA	AA	AA	AA	AA	AA	AA	AA	AA	AA	AA	dd	AA	AA	AA	AA	AB	Ad	AA	AA	Ad
chr1D	253112501	253117000	4500	dd	dd	dd	dd	dd	dd	dd	dd	dd	dd	dd	dd	dd	dd	dd	dd	dd	dd	dd	dd	dd	dd	dd	dd	dd	dd	dd	dd	dd	dd	dd	dd	dd	dd	dd	dd	dd	dd	dd	dd	dd	dd	dd	dd	dd	dd
chr1D	253119001	253123000	4000	dd	dd	dd	dd	dd	dd	dd	dd	dd	dd	dd	dd	dd	dd	dd	dd	dd	dd	dd	dd	dd	dd	dd	dd	dd	dd	dd	dd	dd	dd	dd	dd	dd	dd	dd	dd	dd	dd	dd	dd	dd	dd	dd	dd	dd	dd
chr1D	253423501	253430000	6500	Ad	AA	Ad	Ad	Ad	AA	Ad	Ad	Ad	Ad	Ad	Ad	Ad	Ad	Ad	Ad	Ad	Ad	Ad	AA	Ad	Ad	Ad	Ad	Ad	Ad	Ad	Ad	AA	Ad	Ad	Ad	Ad	Ad	Ad	dd	dd	Ad	Ad	Ad	Ad	Ad	Ad	Ad	Ad	Ad
chr1D	253722001	253733500	11500	AB	AA	AA	AA	AA	AA	AA	AA	AA	AA	AA	AA	AA	AA	AA	AA	AA	AA	AA	Ad	AA	AA	AA	AA	Ad	AA	AA	AB	AA	AA	AA	AA	AA	AB	AA	Ad	AA	AA	Ad	Ad	AA	AA	AA	AA	Ad	AA
chr1D	254205001	254209000	4000	AA	AA	AA	AA	AB	AA	AA	AA	AA	AB	AA	AA	AA	AA	AA	AA	AA	AA	AA	AA	AA	AA	AA	AA	Ad	AA	AA	AB	AA	AA	AA	AA	AA	BB	AA	dd	Ad	AA	AA	Ad	AA	Ad	AA	AA	Ad	AA
chr1D	254952001	254956500	4500	AA	AA	AA	AA	AA	AB	AA	AA	AA	AA	AA	AA	AA	AA	AA	AA	AA	AB	AA	AA	AA	AA	AA	AA	AA	AA	AB	AB	AA	AA	AA	AB	AA	AA	AA	dd	AA	AA	AA	Ad	AA	AA	AA	AA	AA	AA
chr1D	255567501	255576000	8500	AA	AA	AA	AA	AA	AA	AA	AA	AA	AA	AA	AA	AA	AA	AB	AA	AA	AA	AA	AA	AA	AA	AA	AA	AA	AA	AA	AA	AA	AA	AB	AA	AA	AB	AA	AB	AA	AA	AA	AA	AA	AA	AA	AA	AA	AA
chr1D	256701501	256706000	4500	AA	AA	AA	AA	AA	AB	AA	AA	AA	AB	AB	AA	AB	AA	AA	AA	AA	AA	AA	AA	AA	AA	AA	AA	AA	AA	AA	AA	AA	AA	AA	AA	AA	AA	AA	AA	dd	AB	AA	AA	AA	AA	AA	AA	AA	AA
chr1D	256828501	256835500	7000	Ad	AA	AA	AA	AA	Ad	AA	AA	Ad	Ad	AA	Ad	AA	Ad	Ad	AA	AA	Ad	AA	AA	AA	AA	Ad	Ad	Ad	Ad	AA	AA	AA	AA	AA	AA	Ad	Ad	AA	Ad	Ad	Ad	Ad	Ad	Ad	Ad	Ad	Ad	Ad	AA
chr1D	256878501	256927000	48500	AA	AA	AA	AA	AA	AA	AA	AA	AA	AA	AA	AA	AA	AA	AA	AA	AA	AA	AA	AA	AA	AA	AA	dd	AA	AA	AA	AA	AA	AA	AA	AA	AA	AA	AA	AA	AA	AA	AA	AA	AA	AA	AA	AA	AA	AA
chr1D	257081501	257099000	17500	AA	Ad	AA	AA	Ad	AA	AA	AA	AA	AA	AA	AA	AA	AA	AA	AA	AA	AA	AA	Ad	AA	AA	AA	AA	Ad	AA	Ad	Ad	AA	AA	AA	AA	AA	AA	Ad	Ad	AA	Ad	Ad	Ad	AA	Ad	Ad	Ad	Ad	Ad
chr1D	257272001	257280500	8500	AA	AA	AA	AA	AA	AA	AA	AA	AA	AA	AA	AA	AA	AA	AA	AA	AA	AA	AA	AA	AA	AA	AA	AA	AA	AA	AA	AA	AA	Ad	AA	AA	AA	AA	AA	AA	dd	AA	Ad	AA	AA	AA	AA	AA	Ad	Ad
chr1D	257929501	257933500	4000	AB	AB	AA	AB	AA	AA	AA	AA	AB	AA	AB	AA	AA	AA	AA	AA	AA	AB	AA	AA	AA	AB	AA	AA	AA	AA	AA	AA	AB	AB	AA	AA	AB	AA	AB	AB	AA	AA	AA	AA	AA	AA	AA	AA	AA	AA
chr1D	257970501	257979000	8500	AA	AA	AA	AA	AA	AA	AA	AA	AA	AA	AA	AA	AA	AA	AA	AA	AA	AA	AA	AA	AA	AA	AA	AA	AA	AA	AA	AA	AA	AA	AA	AA	AA	AA	AA	AA	AA	AA	AA	AA	AA	AA	AA	AA	AA	AA
chr1D	258144001	258148500	4500	AA	Ad	Ad	AA	AA	AA	Ad	Ad	AA	AA	AA	Ad	Ad	AA	Ad	Ad	Ad	Ad	Ad	AA	Ad	AA	Ad	Ad	Ad	AA	Ad	AB	Ad	Ad	Ad	AA	Ad	AA	AA	dd	Ad	AA	Ad	Ad	AA	Ad	Ad	Ad	Ad	Ad
chr1D	258151501	258156500	5000	Ad	Ad	Ad	Ad	Ad	Ad	Ad	Ad	Ad	Ad	Ad	Ad	Ad	Ad	Ad	Ad	Ad	Ad	Ad	Ad	Ad	Ad	Ad	Ad	Ad	Ad	Ad	AB	Ad	Ad	AA	Ad	Ad	AA	Ad	dd	Ad	AA	Ad	dd	AA	Ad	Ad	Ad	Ad	Ad
chr1D	258370001	258374000	4000	Ad	Ad	Ad	Ad	Ad	Ad	Ad	Ad	Ad	Ad	Ad	Ad	Ad	Ad	Ad	Ad	Ad	Ad	Ad	Ad	Ad	Ad	Ad	Ad	Ad	Ad	Ad	Ad	Ad	Ad	Ad	Ad	Ad	Ad	Ad	dd	dd	Ad	Ad	Ad	Ad	Ad	Ad	Ad	Ad	Ad
chr1D	258532001	258537000	5000	Ad	Ad	Ad	Ad	Ad	Ad	Ad	Ad	AA	Ad	Ad	Ad	Ad	Ad	Ad	Ad	Ad	Ad	AA	Ad	Ad	AA	AA	Ad	Ad	Ad	Ad	Ad	Ad	Ad	Ad	Ad	Ad	Ad	Ad	Ad	Ad	Ad	Ad	Ad	Ad	Ad	Ad	Ad	Ad	Ad
chr1D	258559001	258568000	9000	AA	AA	AA	AA	Ad	AA	AA	AA	AA	AA	AA	Ad	AA	AA	AA	AA	Ad	AA	Ad	AA	AA	AA	AA	Ad	AA	AA	AA	Ad	AA	Ad	AA	Ad	AA	AA	AA	Ad	dd	Ad	Ad	Ad	Ad	Ad	Ad	Ad	Ad	Ad
chr1D	258563501	258568000	4500	AA	AA	AA	Ad	Ad	AA	AA	AA	AA	AA	AA	Ad	AA	AA	AA	AA	Ad	AA	Ad	AA	AA	AA	AA	Ad	AA	AA	AA	AA	AA	Ad	AA	Ad	AA	AA	AA	Ad	dd	Ad	Ad	Ad	Ad	Ad	Ad	Ad	Ad	Ad
chr1D	258669501	258674500	5000	Ad	Ad	Ad	Ad	Ad	Ad	Ad	Ad	Ad	Ad	Ad	Ad	Ad	Ad	AA	Ad	AA	Ad	Ad	AA	Ad	Ad	AA	Ad	Ad	Ad	AA	AA	Ad	AA	Ad	Ad	Ad	AA	Ad	Ad	dd	Ad	Ad	Ad	Ad	Ad	Ad	Ad	Ad	Ad
chr1D	258677001	258681000	4000	Ad	Ad	Ad	Ad	Ad	Ad	AA	Ad	Ad	Ad	AA	Ad	Ad	Ad	Ad	Ad	Ad	Ad	Ad	AA	Ad	AA	Ad	Ad	Ad	Ad	Ad	AA	Ad	AA	Ad	AA	AA	Ad	Ad	Ad	dd	Ad	Ad	Ad	Ad	Ad	Ad	Ad	Ad	Ad
chr1D	259503001	259548000	45000	AA	AA	AA	AA	AA	AA	AA	AA	AA	AA	AA	AA	AA	AA	AA	AA	AA	AA	AA	AA	AA	AA	AA	AA	AA	AA	AA	AA	AA	AA	AA	AA	AA	AA	AA	AA	dd	AA	AA	AA	AA	AA	AA	AA	AA	AA
chr1D	260015001	260019500	4500	AA	AA	AA	AA	AA	AA	AA	AB	AA	AB	AA	AB	AA	AA	AA	AB	AA	AA	AA	AB	AA	AA	AA	AA	AB	AA	AA	AA	AA	Ad	AA	AA	AA	AA	AB	AB	dd	AB	AA	AB	AA	AA	Ad	AA	AA	AA
chr1D	260094501	260098500	4000	Ad	Ad	Ad	dd	Ad	Ad	Ad	Ad	Ad	Ad	dd	Ad	dd	Ad	Ad	Ad	Ad	Ad	Ad	Ad	Ad	Ad	Ad	Ad	Ad	dd	Ad	dd	Ad	Ad	Ad	Ad	Ad	Ad	dd	Ad	Ad	Ad	Ad	Ad	Ad	Ad	dd	Ad	Ad	Ad
chr1D	260100501	260104500	4000	Ad	Ad	dd	dd	dd	Ad	Ad	Ad	Ad	Ad	dd	Ad	dd	Ad	Ad	Ad	Ad	Ad	dd	Ad	Ad	Ad	Ad	Ad	Ad	dd	dd	dd	Ad	Ad	Ad	Ad	Ad	Ad	dd	Ad	Ad	dd	dd	dd	Ad	Ad	dd	Ad	Ad	Ad
chr1D	260902001	260906500	4500	AA	AA	AB	AA	AA	AA	AA	AA	AA	AA	AA	AA	AA	AA	AA	AA	AA	AA	AA	AA	dd	AA	AB	AA	AA	AB	AA	AA	AA	AA	AA	AB	AA	AA	AB	BB	AA	AA	AA	AA	AA	AA	AA	AA	AA	AA
chr1D	261166501	261186500	20000	AA	AA	AA	AA	AA	AA	AA	AA	AA	AA	AA	AA	AA	AA	AA	AA	AA	AA	AA	AA	AA	AA	AA	AA	AA	AA	AA	AA	AA	AA	AA	AA	AA	dd	AA	AA	AA	AA	AA	AA	AA	AA	AA	AA	AA	AA
chr1D	261410501	261414500	4000	AA	AA	AA	AA	AA	AA	AA	Ad	AA	Ad	AA	AA	Ad	AA	AA	AA	AA	AA	AA	Ad	AA	AA	AA	AA	AA	AA	AA	Ad	AA	AA	AA	AA	Ad	AA	AA	AA	Ad	Ad	Ad	AA	AA	Ad	Ad	Ad	Ad	Ad
chr1D	261527501	261532000	4500	dd	dd	dd	dd	dd	dd	dd	dd	dd	dd	dd	dd	dd	dd	dd	dd	dd	dd	dd	dd	dd	dd	dd	dd	dd	dd	dd	dd	dd	dd	dd	dd	dd	dd	dd	dd	dd	dd	dd	dd	dd	dd	dd	dd	dd	dd
chr1D	261598001	261608000	10000	Ad	dd	dd	Ad	dd	Ad	Ad	dd	dd	Ad	dd	dd	Ad	Ad	dd	dd	dd	dd	Ad	dd	dd	Ad	dd	dd	dd	Ad	dd	Ad	dd	Ad	dd	dd	Ad	Ad	Ad	dd	dd	dd	dd	dd	Ad	dd	dd	dd	dd	dd
chr1D	261747501	261751500	4000	AA	AA	AA	AA	AB	AA	AA	AB	AA	AA	AA	AA	AA	AB	AB	AA	AA	AA	AA	AB	AA	AB	AA	AA	AA	AB	AA	AA	AA	AA	AB	AB	AB	AA	AA	AB	AA	AA	AA	AB	AA	AA	AA	AA	AA	AB
chr1D	261787001	261794000	7000	Ad	AA	Ad	Ad	Ad	Ad	Ad	AA	Ad	AA	Ad	Ad	AA	Ad	Ad	Ad	Ad	Ad	Ad	AA	AA	Ad	Ad	Ad	Ad	Ad	Ad	Ad	Ad	AA	AA	AA	Ad	Ad	Ad	Ad	dd	Ad	Ad	Ad	Ad	Ad	Ad	Ad	Ad	Ad
chr1D	262602001	262617500	15500	AA	AA	AA	AA	AA	AA	AA	dd	AA	AA	AA	AA	AA	AA	AA	AA	AA	AA	AA	AA	AA	AA	AA	AA	AA	AA	AA	AA	AA	AA	AA	AA	AA	AA	AA	AA	AA	AA	AA	AA	AA	AA	AB	AA	AA	AA
chr1D	262660501	262680500	20000	AA	AA	Ad	AA	AA	AA	AA	AA	AA	AA	AA	AA	AA	AA	AA	AA	AA	AA	AA	AA	AA	AA	AA	AA	AA	AA	AA	AA	AA	AA	AA	AA	AA	Ad	AA	Ad	dd	Ad	Ad	Ad	AA	Ad	Ad	Ad	Ad	Ad
chr1D	263229501	263234500	5000	AA	AA	AA	AA	AA	AA	AA	Ad	AA	AA	AA	AA	AA	AA	AA	AA	AA	AA	AA	AA	AA	AA	AA	AA	AA	AA	AA	AA	AA	AA	AA	AA	AB	AA	AA	AA	Ad	AA	Ad	AA	AA	AA	AA	AA	AA	AA
chr1D	263366001	263370000	4000	AB	AA	AB	AB	AB	AA	AB	AA	AB	AB	AA	AB	AB	AB	AB	AB	AB	AB	AA	AB	AB	AA	AB	AB	AA	AB	AA	BB	AB	AA	AB	AB	AB	AA	AA	AA	dd	BB	AB	AA	AB	AA	AB	AB	AA	AA
chr1D	263382001	263393000	11000	AA	AA	AA	AA	AA	AA	AA	AA	AA	AA	AA	AA	AA	AA	AA	AA	AB	AA	AA	AA	AA	AA	AB	AA	AA	AA	AA	AB	AB	AA	AA	AA	AA	AA	AA	Ad	dd	AA	Ad	Ad	AA	Ad	AA	AA	Ad	Ad
chr1D	263829001	263850500	21500	AA	AA	AA	AA	AA	AA	AA	AA	AA	AA	AA	AA	AA	AA	AA	AA	AA	AA	AA	AA	dd	AA	AA	AA	AA	AA	AA	AA	AA	AA	AA	AA	AA	AA	AA	AA	AA	AB	AA	AA	AA	AA	AA	AA	AA	AA
chr1D	263998001	264003500	5500	AB	AB	AA	AA	AB	AA	AB	AB	AB	AA	AA	AA	AA	AA	AB	AA	AB	AB	AB	AB	AA	AA	AA	AB	AB	AA	AB	AA	AA	AB	AA	AB	AA	AB	AB	AA	dd	AA	AB	AA	AA	AA	AA	AA	AB	AA
chr1D	264148001	264158500	10500	Ad	Ad	Ad	Ad	Ad	Ad	Ad	Ad	Ad	Ad	Ad	Ad	Ad	Ad	Ad	Ad	Ad	Ad	Ad	Ad	Ad	Ad	Ad	Ad	Ad	Ad	Ad	Ad	Ad	Ad	Ad	Ad	Ad	Ad	Ad	Ad	dd	Ad	Ad	Ad	Ad	Ad	Ad	Ad	Ad	Ad
chr1D	264190001	264208000	18000	AA	AA	AA	AA	AA	AA	AA	AA	AA	AA	AA	AA	AA	AA	AA	AA	AA	AA	AA	AA	AA	AA	AA	AA	AA	AA	AA	AB	AA	AA	AA	AA	AA	AA	AA	AA	dd	AA	AA	AA	AA	AA	AA	AA	AA	AA
chr1D	264307001	264311000	4000	Ad	AA	AA	AA	AA	AA	AA	AA	Ad	AA	Ad	Ad	AA	Ad	AA	Ad	Ad	AA	AA	AA	AA	AA	Ad	Ad	AA	AA	Ad	AA	AA	AA	AA	AA	AA	AA	Ad	Ad	dd	Ad	Ad	Ad	Ad	Ad	Ad	Ad	Ad	Ad
chr1D	264380001	264384000	4000	AA	AA	AA	AA	AA	AA	AA	AA	AA	AA	AA	AA	AA	AA	AA	AB	AA	AA	AB	AA	AA	AA	AA	AA	AA	AA	AA	AA	AB	AA	AA	AA	AA	AA	AA	AA	dd	AA	AA	AA	AA	AA	AA	AA	AA	AA
chr1D	264389501	264393500	4000	Ad	AA	AA	Ad	AA	Ad	AA	Ad	AA	AA	Ad	AA	AA	AA	AA	AA	AA	AA	Ad	AA	AA	AA	AA	AA	AA	Ad	AA	AA	AA	AA	AA	AA	AA	AA	AA	AA	dd	AB	AA	AA	AA	AA	AB	AA	AA	AA
chr1D	264468501	264472500	4000	AA	AA	Ad	AA	AA	AA	AA	AA	AA	AA	AA	AA	Ad	AA	AA	AA	AA	AA	AA	AA	AA	AA	AA	AA	AA	AA	AA	AA	AA	AA	AA	AA	Ad	AA	AA	AA	Ad	AB	AA	AA	AA	AA	AA	AA	AA	AA
chr1D	264473501	264483000	9500	AA	AA	AA	AA	AA	AA	AA	AA	AA	AA	AA	AA	AA	AA	AA	AB	AA	AA	AA	AA	AA	AA	AA	AA	AA	AA	AA	AA	AA	AA	AA	AA	AA	AA	AA	AA	dd	AA	AA	AA	AA	AA	AB	AA	AA	AA
chr1D	264539001	264543000	4000	AA	AB	AA	AA	AA	AA	AA	AA	AA	AA	AA	AA	AA	AA	AA	AA	AA	AA	AA	AA	AA	AA	AA	AA	AA	AA	AA	AA	AB	AB	AA	AA	AA	AA	AA	AA	dd	AA	AA	AA	AA	AA	AA	AA	AA	AA
chr1D	264560001	264564000	4000	Ad	Ad	Ad	Ad	Ad	Ad	Ad	Ad	Ad	Ad	Ad	Ad	Ad	Ad	AA	Ad	Ad	Ad	Ad	Ad	Ad	Ad	Ad	Ad	Ad	Ad	Ad	Ad	Ad	Ad	Ad	Ad	Ad	Ad	Ad	Ad	dd	Ad	Ad	Ad	Ad	Ad	Ad	Ad	Ad	Ad
chr1D	264574501	264588500	14000	AA	AA	AA	AA	AA	AA	AA	AA	AA	AA	AA	AA	AA	AA	AA	AA	AA	AA	AA	AA	AA	AA	AA	AA	AA	AA	AA	AA	AA	AA	AA	AA	AA	AA	AA	AB	dd	AA	AA	AA	AA	AA	AA	AA	AA	AA
chr1D	264581501	264588500	7000	AA	AA	AA	AA	AA	AA	AA	AA	AA	AA	AA	AA	AA	AA	AA	AA	AA	AA	AA	AA	AA	AA	AA	AB	AA	AA	AA	AA	AA	AA	AA	AA	AA	AA	AA	AB	dd	AA	AA	AA	AA	AA	AA	AA	AA	AA
chr1D	264673001	264677500	4500	AA	AA	AA	AA	AA	AA	AA	AA	AA	AA	AA	AA	AA	AA	AA	AA	AA	AA	AA	AA	AA	AA	AA	AA	AA	AB	AA	AA	AA	AA	AA	AA	AA	AA	AA	AA	dd	AB	AA	AA	AA	AA	AA	AA	AA	AA
chr1D	264697001	264702000	5000	AA	AB	AA	AA	AB	AA	AA	AA	AA	AA	AA	AA	AA	AB	AA	AA	AA	AA	AA	AA	AA	AA	AA	AA	AA	AA	AA	AB	AB	AA	AA	AA	AA	AB	AA	dd	Ad	AB	AA	Ad	AA	AA	AA	AA	AA	AA
chr1D	264702001	264706500	4500	AA	AA	AA	AA	AA	AB	AA	AA	AA	AA	Ad	AA	AA	AA	AA	Ad	AA	AA	Ad	AA	AA	AB	AA	AA	Ad	AA	AB	BB	AB	AA	AB	AA	AA	AA	AA	Ad	dd	AA	Ad	Ad	AA	AA	AA	AA	Ad	Ad
chr1D	264904501	264908500	4000	AA	AA	AA	AA	AA	AA	AA	AA	AA	AA	AA	AA	AA	AA	AA	AA	AA	AA	AA	AA	AA	AA	AA	AA	dd	AA	AA	Ad	AA	AA	AA	AA	AA	AA	AA	AB	AA	AA	AA	AA	AA	AA	AA	AA	AA	AA
chr1D	265128001	265136000	8000	AA	AA	AA	AA	AA	AA	AA	AA	AA	AA	AA	AA	AA	AA	AA	AA	AA	AA	AA	AA	AA	Ad	AA	AA	AA	AA	AA	AA	AA	AA	AA	AA	AA	AA	AA	Ad	dd	AB	AA	Ad	AA	AA	AA	AA	AA	AA
chr1D	265220001	265224000	4000	AB	AA	AA	AA	AA	AA	AA	AA	AA	AA	Ad	AA	AA	Ad	AA	Ad	AA	AA	AA	AA	Ad	AA	AA	AA	AA	AA	AA	AA	AA	AA	Ad	AA	AA	AA	AA	AA	dd	AA	AA	AA	AA	AA	AA	AA	AA	AA
chr1D	265409001	265415500	6500	AA	AA	AA	AA	AA	AA	AA	AA	AA	AA	AA	AA	AA	AA	AA	AA	AA	AA	AA	AA	AA	AA	AA	AA	AA	AA	AA	AA	AA	AA	AA	AA	Ad	Ad	Ad	AA	dd	AA	AA	Ad	AA	AA	AA	AA	AA	AA
chr1D	265862001	265867500	5500	dd	dd	dd	dd	Ad	dd	dd	dd	dd	dd	dd	dd	dd	dd	dd	dd	dd	dd	dd	dd	dd	dd	dd	dd	dd	dd	dd	dd	dd	dd	dd	dd	dd	dd	dd	dd	dd	dd	dd	dd	dd	dd	dd	dd	dd	dd
chr1D	266080501	266085500	5000	AA	Ad	Ad	Ad	AA	AA	Ad	AA	Ad	Ad	Ad	dd	dd	Ad	AA	Ad	dd	AA	AA	Ad	Ad	Ad	AA	Ad	Ad	Ad	Ad	AB	AA	AA	AA	Ad	AA	AA	Ad	Ad	dd	AB	AA	Ad	AA	dd	dd	AA	Ad	Ad
chr1D	266367001	266375500	8500	AA	AA	AA	AA	AA	AA	AA	AA	AA	AA	AA	AA	AA	AA	AA	AA	AA	AA	dd	AA	AA	AA	AA	AA	AA	AA	AA	AA	AA	AA	AA	AA	AA	AA	AA	AA	AA	AA	AA	AA	AA	AA	AA	AA	AA	AB
chr1D	266428501	266432500	4000	AA	AB	AA	AB	AA	AA	AA	AA	AA	AA	AA	AA	AA	AA	AA	AA	AA	AA	AA	AB	AB	AA	AA	AA	AA	AA	AA	AA	AA	AA	AA	AA	AA	AA	AA	AA	dd	AB	AA	AA	AA	AA	AB	AA	AA	AA
chr1D	266447501	266451500	4000	AA	AA	AA	AA	AB	AA	AA	AA	AA	AA	AA	AA	AA	AA	AA	AA	AA	AA	AA	AA	AA	AB	AB	AA	AA	AA	AA	AA	AB	AB	AB	AA	AB	AA	AA	AA	dd	AA	AA	AA	AA	AA	AA	AA	AA	AB
chr1D	266475501	266481000	5500	AA	AA	AA	AA	AA	AA	AA	AA	AB	AA	AA	AA	AA	AA	AA	AB	AA	AA	AA	AA	AA	AA	AA	AA	AA	AA	AA	AA	AA	AA	AB	AA	AB	AA	AA	AA	dd	AA	AA	AA	AA	AA	AA	AA	AA	AA
chr1D	266694001	266698000	4000	AA	AA	AA	AA	Ad	AA	AA	AA	AA	AA	AA	AA	AA	AA	Ad	Ad	AA	Ad	AA	AA	AA	Ad	Ad	AA	Ad	AA	AA	AA	AA	AA	AA	AA	AA	AA	Ad	AA	dd	AA	AA	AA	AA	AA	AA	AA	AA	AA
chr1D	266727001	266736500	9500	AA	AA	AA	AA	AA	AA	AA	AA	AA	AA	AA	AA	AA	AA	AA	AA	AA	AA	AA	AA	AA	AA	AA	AA	AA	AA	AA	AA	AB	AA	AB	AA	AA	AA	AA	AA	dd	AA	AA	AA	AA	AA	AA	AA	AA	AA
chr1D	266772001	266777000	5000	AB	AA	AA	AA	AA	AA	AA	AA	AB	AA	AA	AA	AA	AA	AA	AA	AA	AA	AA	AA	AA	AA	AA	AA	AA	AA	AA	AA	AA	AA	AA	AA	AA	AA	AA	AA	dd	AB	AA	AA	AA	AA	AB	AA	AA	AA
chr1D	266861501	266866500	5000	Ad	Ad	Ad	Ad	AA	AA	AA	Ad	AA	Ad	AA	Ad	Ad	AA	Ad	Ad	Ad	AA	AA	Ad	Ad	Ad	Ad	Ad	AA	Ad	AA	AA	AA	Ad	Ad	AA	Ad	Ad	Ad	Ad	dd	Ad	Ad	Ad	Ad	Ad	Ad	Ad	Ad	Ad
chr1D	266874501	266901000	26500	AA	AA	AA	AA	AA	AA	AA	AA	AA	AA	AA	AA	AA	AA	AA	AA	AA	AA	AA	AA	AA	AA	AA	AA	AA	AA	AA	AA	AA	AA	AA	AA	AA	AA	AA	AA	dd	AA	AA	AA	AA	AA	AA	AA	AA	AA
chr1D	266909501	266921000	11500	AA	AA	AA	AA	AA	AA	AA	AA	AA	AA	AA	AA	AA	AA	AA	AA	AA	AA	AA	AA	AA	AA	AA	AA	AA	AA	AA	AA	AA	AA	AA	AA	AA	AB	AA	AA	dd	AA	AA	AA	AA	AA	AA	AA	AA	AA
chr1D	266957001	266963000	6000	AA	AA	AA	AA	AA	AA	AA	AA	AA	AA	AA	AA	AA	AA	AA	AA	Ad	AA	AA	AA	AA	AA	AA	AA	AA	AA	AA	AA	AA	AA	AA	AA	AA	AA	AA	AA	dd	Ad	AA	AA	AA	AA	AA	AA	AA	AA
chr1D	267137001	267141000	4000	Ad	Ad	Ad	Ad	Ad	Ad	Ad	Ad	AA	Ad	Ad	Ad	Ad	Ad	Ad	AA	Ad	Ad	Ad	Ad	Ad	Ad	Ad	Ad	Ad	Ad	Ad	BB	Ad	Ad	Ad	Ad	Ad	Ad	Ad	AA	Ad	AB	AA	Ad	AA	Ad	Ad	Ad	Ad	AA
chr1D	267233001	267239000	6000	AA	AA	AA	AA	AA	AA	AA	AA	AA	AA	AA	AA	AA	AA	AA	AA	AA	AA	AA	AA	AA	AB	AA	AA	AA	AA	AA	Ad	AA	AA	AA	AA	AA	AA	AA	AA	dd	AB	AA	AA	AA	AA	AA	AA	AA	AA
chr1D	267409001	267414000	5000	AA	AA	AA	AA	AA	AA	AA	AA	AA	AA	AA	AA	AA	Ad	AA	AA	AA	AA	AA	Ad	AA	AA	AA	AA	AA	AA	AA	AB	AA	AB	AA	AA	AA	AA	AA	dd	Ad	AB	Ad	Ad	AA	Ad	Ad	AA	AA	Ad
chr1D	268170001	268178000	8000	AA	AA	AA	AA	AA	AA	AA	AA	AA	AA	AA	AA	AB	AA	AA	AA	AA	AA	AA	AA	AA	AA	AA	AA	AA	AA	AA	AA	AA	AA	AA	AA	AA	AA	AA	AA	AA	AA	AA	AA	AA	AA	AB	AA	AA	AA
chr1D	268253501	268259000	5500	AA	AA	AA	AA	AA	AA	AA	AB	AA	AA	AA	AA	AA	AA	AA	AA	AA	AA	AA	AA	AA	AB	AA	AA	AA	AA	AA	AA	AA	AA	AA	AA	AA	AA	AA	AB	dd	AA	AA	AB	AA	AB	Ad	AA	AA	AA
chr1D	268415501	268427000	11500	AA	AA	AA	AA	AA	AA	AA	dd	AA	AA	AA	AA	AA	AA	AA	AA	AA	AA	AA	AA	AA	AA	AA	AA	dd	AA	dd	dd	AA	AA	AA	AA	AA	AA	AA	AA	AA	AA	AA	AA	AA	AA	AA	AA	AA	AA
chr1D	268624001	268629500	5500	AA	Ad	AA	AB	AA	AA	AA	AA	AA	AA	AA	AA	AB	AA	AA	AA	Ad	AA	AA	AA	AA	AA	AA	AA	AA	AA	AA	AB	AA	AA	AA	AA	AA	AB	AA	dd	dd	AA	Ad	Ad	AA	Ad	Ad	Ad	Ad	Ad
chr1D	268624001	268636500	12500	Ad	Ad	Ad	AA	AA	AA	AA	AA	AA	AA	Ad	Ad	AA	AA	AA	AA	Ad	AA	Ad	Ad	Ad	Ad	Ad	Ad	Ad	Ad	Ad	AB	AA	Ad	AA	Ad	AA	AB	Ad	Ad	dd	AA	Ad	Ad	AA	Ad	Ad	Ad	Ad	Ad
chr1D	268631501	268636500	5000	Ad	Ad	Ad	AA	Ad	AA	Ad	Ad	Ad	Ad	Ad	Ad	Ad	AA	AA	Ad	Ad	Ad	Ad	Ad	Ad	Ad	Ad	Ad	Ad	Ad	Ad	AB	Ad	Ad	Ad	Ad	AA	AA	Ad	Ad	dd	AA	Ad	Ad	AA	Ad	Ad	Ad	Ad	Ad
chr1D	268655001	268666000	11000	AA	Ad	AA	AA	AA	AA	AA	AA	Ad	AA	AA	AA	AA	AA	AA	AA	AA	AA	AA	AA	AA	Ad	Ad	AA	AA	AA	AA	AA	Ad	AA	AA	AA	Ad	AA	AA	AA	dd	AA	Ad	AA	AA	Ad	Ad	AA	Ad	Ad
chr1D	268721001	268727000	6000	AA	AA	AB	AA	AA	AA	AA	AA	AA	AA	AA	AB	AA	AA	AA	AA	AA	AA	AA	AA	dd	AA	AA	AA	AA	AA	AA	AA	AA	AA	AA	AA	AA	AA	AA	AA	AA	AA	AA	AA	AA	AA	AA	AA	AA	AA
chr1D	268864001	268873000	9000	BC	BC	BC	BC	BC	M	BC	AA	BC	M	M	M	BC	BC	M	M	BC	M	BC	M	BB	BC	BC	BC	AB	BC	BC	BB	M	M	BC	BC	BC	BC	BC	BB	dd	BB	AB	BB	BB	AB	AB	AB	BB	AB
chr1D	268911501	268917500	6000	AA	AA	AA	Ad	AA	AA	AA	AA	AA	AA	AA	AA	AA	AA	AA	AA	AA	Ad	AA	AA	AA	AA	AA	AA	AA	AA	AA	AA	AA	AA	AA	AA	AA	AA	AA	AA	dd	Ad	Ad	AA	AA	AA	Ad	AA	Ad	Ad
chr1D	268993001	268997000	4000	AA	AB	AA	AA	AA	AA	AA	AA	AA	AA	AA	AA	AB	AA	AA	AA	AA	AA	Ad	AA	AA	AA	AA	AA	AA	AA	AA	AA	AA	AA	AA	AA	AA	AA	AA	AB	dd	AA	AA	AB	AA	AA	AA	AA	AA	AA
chr1D	269403501	269416000	12500	AA	AA	AA	AA	AA	AA	AA	AA	AA	AA	AA	AA	AA	AA	AA	AA	AA	AA	AA	AA	AA	AA	AA	AA	AA	AA	AA	AA	AA	AA	AA	AA	AA	AA	AA	AA	Ad	AA	AA	AA	AA	AA	AA	AA	AA	AA
chr1D	269418501	269422500	4000	AA	AA	AA	AA	AA	AA	AA	AA	AA	AA	AA	AA	AA	AA	AA	AA	AA	Ad	AA	AA	Ad	AA	AA	AA	AA	AA	AA	AA	AA	AA	AA	AA	AA	AA	AA	AA	AA	AA	AA	AA	AA	AA	Ad	Ad	AA	AA
chr1D	269426501	269437500	11000	AA	AA	AA	AA	AA	AA	AA	AA	AA	AA	AA	AA	AA	AA	AA	AA	AA	AA	AA	AA	AA	AA	AA	AA	AA	AA	AA	AA	AA	AA	AA	AA	AA	AA	AA	AA	Ad	Ad	AA	AA	AA	AA	Ad	Ad	AA	AA
chr1D	269459001	269473500	14500	AA	AA	AA	AA	AA	AA	AA	AA	AA	AA	AA	AA	AA	AA	AA	AA	AA	AA	AA	AA	AA	AA	AA	AA	AA	AA	AA	AA	AA	AA	AA	AA	AA	AA	AA	AA	dd	AA	AA	AA	AA	AA	AA	AA	AA	AA
chr1D	269533001	269537000	4000	Ad	Ad	Ad	Ad	Ad	Ad	Ad	Ad	Ad	Ad	Ad	Ad	Ad	AA	Ad	Ad	Ad	Ad	Ad	AA	Ad	Ad	Ad	Ad	Ad	Ad	Ad	Ad	Ad	AA	Ad	Ad	AA	Ad	Ad	dd	dd	Ad	Ad	Ad	Ad	Ad	Ad	Ad	Ad	Ad
chr1D	269617001	269621000	4000	AA	AA	AA	AA	AA	AA	AA	AA	AA	AA	AA	AA	Ad	AA	AA	AA	Ad	AA	AA	AA	AA	AA	AA	Ad	AA	AA	AA	AB	AA	AA	AA	AA	AA	AA	AA	dd	AA	AA	AA	Ad	AA	Ad	Ad	AA	AA	AA
chr1D	270116501	270135500	19000	AA	AA	AA	AA	AA	AA	AA	AA	AA	AA	AA	AA	AA	AA	AA	AA	AA	AA	AA	AA	AA	AA	AA	AA	AA	AA	AA	AA	AA	AA	AA	AA	AA	AA	AA	AA	dd	AA	AA	AA	AA	AA	AA	AA	AA	AA
chr1D	270430501	270435000	4500	AA	AA	AA	AA	AA	AA	AA	AA	AA	AA	AA	AA	AA	AA	AA	AA	AA	AA	AA	AA	AA	AA	AA	AA	AA	AA	AA	AB	AA	AA	AA	AA	AA	AA	AA	AA	dd	AA	AA	AA	AA	AA	AA	AA	AA	AA
chr1D	270523501	270527500	4000	Ad	Ad	Ad	Ad	Ad	AA	Ad	Ad	Ad	Ad	Ad	Ad	AA	Ad	Ad	Ad	Ad	Ad	Ad	Ad	Ad	Ad	Ad	Ad	Ad	Ad	Ad	Ad	Ad	Ad	Ad	Ad	Ad	Ad	Ad	Ad	Ad	Ad	Ad	Ad	Ad	Ad	Ad	Ad	Ad	Ad
chr1D	270623001	270639500	16500	AA	AA	AA	AA	AA	AA	AA	AA	AA	AA	AA	AA	AA	AA	AA	AA	AA	AA	AA	AA	AA	AA	AA	AA	AA	AA	AA	AA	AA	AA	AA	AA	AA	AA	AA	AA	dd	AA	AA	AA	AA	AA	AA	AA	AA	AA
chr1D	270652501	270656500	4000	AA	AA	AA	AA	AA	AA	AA	AA	AA	AA	AA	AA	Ad	AA	AA	Ad	AA	AA	Ad	AA	AA	AA	AA	AA	AA	AA	AA	AA	AA	Ad	AA	AA	Ad	AA	AA	AA	dd	Ad	AA	AA	AA	AA	Ad	Ad	AA	Ad
chr1D	270702501	270708500	6000	AA	AA	AA	AA	AA	AA	AA	AA	AA	AB	AA	AA	AA	AA	AA	AA	AA	AA	AA	AA	AA	AA	AA	AA	AA	AA	AA	AA	AA	AA	AA	AA	AA	AA	AA	AA	dd	AA	AA	AA	AA	AA	AB	AA	AA	AA
chr1D	270884501	270889000	4500	AA	AA	AA	AB	AA	AA	AA	AA	AB	AA	AA	AA	AA	AA	AA	AA	Ad	AA	AA	AA	AA	AA	AA	AA	AA	Ad	AA	M	AA	AA	AB	AA	AB	AB	AA	Ad	dd	BB	AB	AA	BB	AB	AB	AB	Ad	AB
chr1D	270884501	270895000	10500	AA	AB	AA	AB	AA	AB	AA	AA	AB	AB	AB	AA	AB	AB	AA	AA	AA	AA	AA	AA	AA	AA	AB	AA	AA	AA	AB	BB	AA	AA	AB	AA	AB	AB	AA	Ad	dd	AA	AA	Ad	AA	Ad	AA	AA	Ad	AA
chr1D	270904501	270922500	18000	AA	Ad	AA	AA	AA	AA	AA	AA	AA	AA	AA	AA	AA	AA	AA	AA	Ad	AA	Ad	AA	AA	Ad	AA	AA	Ad	AA	Ad	Ad	AA	AA	AA	Ad	Ad	AA	AA	Ad	dd	Ad	Ad	Ad	AA	Ad	Ad	Ad	Ad	Ad
chr1D	270965001	270969000	4000	Ad	Ad	Ad	Ad	Ad	Ad	Ad	Ad	Ad	Ad	Ad	Ad	Ad	Ad	Ad	Ad	Ad	Ad	Ad	Ad	Ad	Ad	Ad	Ad	Ad	dd	Ad	Ad	Ad	Ad	Ad	Ad	Ad	Ad	Ad	dd	dd	dd	Ad	dd	Ad	Ad	Ad	Ad	Ad	Ad
chr1D	271035501	271039500	4000	AA	AA	AA	AA	AA	AA	AA	AA	AA	AA	Ad	AA	AA	AA	AA	AA	Ad	AA	AA	AA	AA	AA	AA	AA	AA	AA	AA	AB	Ad	AA	AB	AA	AA	AA	AA	dd	AA	AB	AA	Ad	AA	AA	AA	AA	AA	AA
chr1D	271043501	271048000	4500	AB	AA	AA	AA	AA	AA	AA	AA	Ad	AA	Ad	AA	AA	AA	AA	AA	AA	AA	AA	AA	AA	AA	AB	Ad	AA	AA	AA	AB	AA	AA	AA	AA	AA	AA	AA	dd	dd	AA	Ad	Ad	AA	Ad	Ad	Ad	Ad	Ad
chr1D	271172501	271196500	24000	Ad	Ad	Ad	Ad	Ad	Ad	Ad	Ad	dd	Ad	Ad	Ad	Ad	Ad	Ad	Ad	Ad	Ad	Ad	dd	Ad	Ad	Ad	Ad	Ad	Ad	Ad	Ad	Ad	Ad	Ad	Ad	dd	Ad	Ad	dd	dd	dd	dd	dd	Ad	dd	dd	Ad	dd	dd
chr1D	271645501	271655000	9500	AA	AA	AA	AA	AA	AA	AA	AA	AA	AA	AA	AA	AA	AA	AA	AA	AA	AA	AA	AA	AA	AA	AA	AA	AA	AA	AA	AA	AA	AA	AA	AA	AA	AA	AA	AB	dd	AA	AA	AA	AA	AA	AA	AA	AA	AA
chr1D	271764501	271770500	6000	Ad	Ad	Ad	dd	Ad	dd	Ad	Ad	Ad	Ad	Ad	Ad	Ad	Ad	Ad	Ad	Ad	Ad	Ad	Ad	Ad	Ad	Ad	Ad	Ad	Ad	Ad	Ad	Ad	Ad	Ad	Ad	Ad	Ad	Ad	dd	dd	dd	dd	dd	Ad	dd	dd	dd	dd	dd
chr1D	271780001	271790000	10000	AA	AA	AA	AA	AA	AA	AA	AA	AA	AA	AA	AA	AA	AA	AA	AA	AA	AA	AA	AA	AA	AA	AA	AA	AA	AA	AA	AA	AA	AA	AA	AA	AA	AA	AA	AA	AA	AA	AA	AB	AA	AA	AA	AA	AA	AA
chr1D	271822501	271830000	7500	AA	AA	Ad	Ad	Ad	AA	AA	AA	Ad	AA	AA	Ad	Ad	Ad	Ad	Ad	AA	AA	Ad	AA	AA	AA	Ad	Ad	Ad	AA	Ad	AA	Ad	AA	AA	Ad	AA	AA	AA	dd	Ad	Ad	Ad	Ad	Ad	Ad	Ad	Ad	Ad	Ad
chr1D	272020501	272028500	8000	AB	AA	AA	AB	AB	AA	AA	AA	AA	AA	AA	AA	AA	AA	AA	AA	AA	AA	AA	AA	AA	AA	AA	AA	AA	AA	AA	AB	AA	AA	AB	AA	AA	AA	AA	Ad	dd	AA	Ad	Ad	AA	Ad	AA	Ad	Ad	AA
chr1D	272120501	272124500	4000	AA	AA	Ad	AA	AA	AA	AA	AA	AA	AA	Ad	Ad	AA	AA	AA	AA	AA	AA	Ad	AA	AA	AA	AA	Ad	AA	AA	AA	AA	AA	AA	Ad	AA	AA	AA	AA	Ad	dd	Ad	Ad	Ad	Ad	AA	Ad	Ad	Ad	Ad
chr1D	272195501	272205500	10000	AA	AA	AA	AA	AA	AA	AA	AA	AA	AA	AA	AA	AA	AA	AA	AA	Ad	AA	AA	AA	AA	AA	Ad	AA	AB	AA	AA	AA	Ad	AA	AA	AA	AA	AA	AA	AA	dd	AA	AA	AA	AA	Ad	AA	AA	AA	AA
chr1D	272405501	272410500	5000	Ad	Ad	AA	AA	Ad	Ad	Ad	AA	AA	AA	AA	Ad	Ad	AA	Ad	Ad	Ad	AA	AA	Ad	AA	Ad	AA	Ad	Ad	Ad	AA	Ad	Ad	Ad	AA	Ad	AA	Ad	Ad	Ad	dd	Ad	Ad	Ad	Ad	Ad	Ad	Ad	Ad	Ad
chr1D	272412501	272416500	4000	AA	AA	Ad	Ad	Ad	Ad	AA	AA	Ad	Ad	Ad	AA	Ad	AA	Ad	Ad	Ad	Ad	AA	Ad	Ad	Ad	Ad	AA	Ad	Ad	Ad	AA	Ad	Ad	Ad	Ad	Ad	Ad	Ad	Ad	dd	AA	AA	Ad	AA	Ad	Ad	Ad	Ad	Ad
chr1D	272578501	272586500	8000	AA	AA	AA	AA	AA	AA	AA	AA	AA	AA	AA	AA	AA	AA	AA	AA	AA	AA	AA	AA	AA	AA	AA	AA	AA	AA	AA	AA	AA	AA	AA	AA	AA	AA	AA	AA	dd	AA	AA	AA	AA	AA	AA	AA	AA	AA
chr1D	272685501	272690500	5000	AA	AA	AA	Ad	AA	AA	AA	AA	AA	AA	AA	AA	AA	AA	AA	AA	AA	Ad	AA	AA	AA	AA	Ad	AA	AA	AA	AA	AA	AA	AA	AA	AA	AA	AA	AA	AA	dd	AA	AA	Ad	AA	AA	AA	Ad	AA	Ad
chr1D	272698001	272702000	4000	Ad	Ad	AA	AA	AA	Ad	AA	Ad	Ad	Ad	Ad	Ad	Ad	AA	AA	Ad	AA	AA	AA	Ad	AA	Ad	AA	Ad	AA	Ad	Ad	AB	AA	Ad	AA	Ad	Ad	Ad	Ad	Ad	dd	AA	Ad	Ad	AA	Ad	Ad	Ad	Ad	Ad
chr1D	272736501	272740500	4000	AA	AA	AA	AA	AA	AA	AA	AA	AA	AA	AA	AA	AA	AA	AA	AA	AA	AA	AA	AA	Ad	AA	Ad	AA	AA	AA	AA	AB	AA	AA	AA	AA	AA	AA	AA	AA	dd	AA	AA	AA	AA	AA	AA	AA	AA	AA
chr1D	272833501	272838500	5000	AA	AA	AA	AA	AA	AA	AA	AA	AA	AA	AA	AA	AA	AA	AA	AA	AA	AA	AA	AA	AA	AA	AA	AA	AA	Ad	AA	AA	AA	AA	AA	AA	AA	AA	AA	AA	Ad	AA	AA	Ad	AA	AA	AA	AA	AA	AA
chr1D	273097501	273102500	5000	AA	AA	AA	AA	AB	AA	AA	AA	AA	AA	AA	AA	AA	AA	AA	AA	AA	AA	AA	AA	AA	AA	AA	AA	AA	AA	AA	AA	AA	AA	AA	AA	AA	AA	AA	AA	dd	Ad	AA	AA	AA	AA	Ad	AA	AA	Ad
chr1D	273127501	273146000	18500	AA	AA	AA	AA	AA	AA	AA	AA	AA	AA	Ad	AA	AA	AA	AA	AA	AA	AA	AA	AA	AA	AA	AA	AA	AA	AA	AA	AB	AA	AA	AA	AA	AA	AA	Ad	Ad	dd	AA	AA	Ad	AA	AA	AA	AA	Ad	Ad
chr1D	273311001	273331500	20500	Ad	Ad	Ad	Ad	Ad	Ad	Ad	Ad	Ad	Ad	Ad	Ad	Ad	Ad	Ad	Ad	Ad	Ad	Ad	Ad	Ad	Ad	Ad	Ad	Ad	Ad	Ad	Ad	Ad	Ad	Ad	Ad	Ad	Ad	Ad	Ad	dd	Ad	Ad	Ad	Ad	Ad	Ad	Ad	Ad	Ad
chr1D	273420001	273424500	4500	Ad	Ad	Ad	Ad	Ad	Ad	AA	Ad	Ad	Ad	Ad	Ad	Ad	Ad	Ad	Ad	Ad	Ad	Ad	AA	Ad	Ad	AA	Ad	Ad	Ad	Ad	AB	Ad	Ad	Ad	AA	Ad	AA	Ad	dd	Ad	AA	Ad	dd	AA	Ad	Ad	Ad	Ad	Ad
chr1D	273435501	273441500	6000	AA	AA	AA	AA	AA	AA	AA	AA	AA	AA	AA	AA	AA	AA	AA	AA	AA	AA	AA	AA	AA	AA	AA	AA	AA	AA	AA	AA	AB	AA	AA	AA	AA	AA	AA	AA	Ad	AA	AA	AA	AA	AA	AA	AA	AA	AA
chr1D	273450001	273454000	4000	AB	AA	AB	AA	AA	AA	AA	AA	AB	AA	AA	AA	AA	AA	AA	AA	AA	AA	AB	AA	AA	AA	AB	AA	AA	AA	AA	AB	AA	AA	AA	AB	AA	AA	AA	AA	dd	AA	AA	AA	AA	AA	AA	AA	AA	AA
chr1D	273707501	273719000	11500	AA	AB	AA	AB	AA	AA	AA	AA	AA	AB	AB	AA	AA	AB	AB	AA	AA	AA	AA	AA	AA	AA	AA	AA	AA	AB	AA	AB	AA	AA	AA	AA	AA	AB	AA	AA	dd	AB	AA	AA	AA	AA	AA	AB	AA	AA
chr1D	273785001	273792000	7000	AA	AA	AA	AA	AA	AA	AA	AA	AA	AA	AA	AA	AA	AA	AA	AA	AA	AA	AA	AA	AA	AA	AA	AA	AA	AA	AA	AA	AA	AA	AA	AA	AA	AA	AA	AA	dd	AA	AA	AA	AA	AA	AA	AA	AA	AA
chr1D	273994001	273998500	4500	Ad	dd	Ad	Ad	Ad	Ad	dd	dd	dd	dd	dd	Ad	Ad	Ad	dd	Ad	Ad	dd	Ad	dd	Ad	dd	Ad	dd	Ad	dd	dd	Ad	dd	dd	dd	Ad	dd	Ad	dd	dd	dd	dd	dd	dd	dd	dd	dd	dd	dd	dd
chr1D	274021001	274026000	5000	AA	AA	AA	AA	AA	Ad	AA	AA	AA	AA	AA	AA	AA	AA	AA	AA	AA	AA	AA	AA	AA	AA	AA	AA	AA	Ad	AA	AA	AA	AA	AA	AA	AA	AA	AA	AA	Ad	Ad	AA	AA	AA	AA	AA	AA	AA	AA
chr1D	274099001	274105000	6000	AA	Ad	AA	AA	AA	AA	AA	AA	Ad	AA	AA	AA	AA	AA	Ad	AA	AA	AA	AA	AA	AA	AA	AA	AA	AA	AA	AA	AA	AA	AA	AA	AA	AA	AA	Ad	Ad	dd	Ad	Ad	Ad	AA	Ad	Ad	Ad	Ad	Ad
chr1D	274240501	274246000	5500	AA	AA	AA	AA	AA	AA	AA	AA	AA	AA	AA	AA	AA	AA	AA	AA	AA	AA	AA	AA	AA	AA	AA	AA	AA	AA	AA	AA	AA	Ad	AA	AA	AA	AA	AA	Ad	dd	Ad	AA	AA	AA	Ad	Ad	Ad	Ad	AA
chr1D	274269501	274295500	26000	Ad	Ad	Ad	Ad	Ad	Ad	Ad	Ad	Ad	Ad	Ad	Ad	Ad	Ad	Ad	Ad	Ad	Ad	Ad	Ad	Ad	Ad	Ad	Ad	Ad	Ad	Ad	Ad	Ad	Ad	Ad	Ad	Ad	Ad	Ad	Ad	dd	Ad	Ad	dd	Ad	Ad	Ad	Ad	Ad	dd
chr1D	274396501	274409500	13000	Ad	AA	Ad	AA	Ad	Ad	Ad	AA	AA	Ad	AA	AA	AA	AA	Ad	AA	Ad	AA	AA	AA	AA	Ad	AA	Ad	Ad	AA	Ad	AA	Ad	AA	AA	Ad	AA	Ad	AA	Ad	dd	Ad	Ad	Ad	AA	Ad	Ad	Ad	AA	AA
chr1D	274557501	274570000	12500	AA	AA	AA	AA	AA	AA	AA	AA	AA	AA	AA	AA	AA	AA	AA	AA	AA	AA	AA	AA	AA	AA	AA	AA	AA	AA	AA	AA	AA	AA	AA	AA	AA	AA	AB	AA	dd	AA	AA	AA	AA	AA	AA	AA	AA	AA
chr1D	274651501	274656000	4500	Ad	Ad	Ad	Ad	Ad	Ad	Ad	Ad	Ad	Ad	Ad	Ad	Ad	Ad	Ad	Ad	Ad	Ad	Ad	Ad	Ad	Ad	Ad	Ad	Ad	Ad	dd	AA	dd	Ad	Ad	Ad	Ad	Ad	Ad	dd	dd	dd	dd	dd	Ad	Ad	Ad	Ad	Ad	Ad
chr1D	274695501	274724500	29000	AA	AA	AA	AA	AA	AA	AA	AA	AA	AA	AA	AA	AA	AA	AA	AA	AA	AA	AA	AA	AA	AA	AA	AA	AA	AA	AA	AA	AA	AA	AA	AA	AA	AA	AA	AA	dd	AA	AA	AA	AA	AA	AA	AA	AA	AA
chr1D	274971001	274975500	4500	dd	dd	dd	dd	dd	dd	Ad	dd	Ad	dd	dd	dd	dd	Ad	dd	dd	dd	dd	Ad	Ad	dd	dd	dd	Ad	dd	dd	dd	dd	dd	dd	dd	dd	dd	dd	dd	dd	dd	dd	dd	dd	Ad	dd	dd	dd	dd	dd
chr1D	274971001	274988000	17000	Ad	Ad	Ad	Ad	Ad	Ad	Ad	Ad	Ad	Ad	Ad	Ad	Ad	Ad	Ad	Ad	Ad	Ad	Ad	Ad	Ad	Ad	Ad	Ad	Ad	Ad	Ad	Ad	Ad	Ad	Ad	Ad	Ad	Ad	Ad	dd	dd	Ad	dd	dd	Ad	Ad	Ad	Ad	dd	dd
chr1D	274980501	274988000	7500	Ad	Ad	Ad	Ad	Ad	Ad	Ad	Ad	Ad	Ad	Ad	Ad	Ad	Ad	Ad	Ad	Ad	Ad	Ad	Ad	Ad	Ad	Ad	Ad	Ad	Ad	Ad	Ad	Ad	dd	Ad	Ad	Ad	Ad	Ad	dd	dd	dd	dd	dd	Ad	Ad	Ad	dd	dd	dd
chr1D	275101001	275105500	4500	AA	AA	AA	AA	AA	AA	AA	AA	AA	AA	AA	AA	AA	AA	AA	AA	AA	AA	AA	AA	AA	AA	AA	AA	AA	AA	AA	AA	AA	AA	AA	AA	AA	AA	AA	AB	dd	AA	AA	AA	AA	AA	AA	AA	AA	AA
chr1D	275440001	275444000	4000	dd	dd	dd	dd	dd	dd	dd	dd	dd	dd	dd	dd	dd	dd	dd	dd	dd	dd	dd	dd	dd	dd	dd	dd	dd	dd	dd	dd	dd	dd	dd	dd	dd	dd	dd	dd	dd	dd	dd	dd	dd	dd	dd	dd	dd	dd
chr1D	275440001	275452000	12000	Ad	Ad	Ad	Ad	Ad	Ad	Ad	Ad	AA	Ad	Ad	Ad	Ad	Ad	Ad	Ad	Ad	Ad	Ad	AA	Ad	Ad	Ad	Ad	Ad	Ad	Ad	Ad	Ad	Ad	Ad	Ad	Ad	Ad	Ad	dd	dd	Ad	Ad	Ad	Ad	Ad	Ad	Ad	Ad	Ad
chr1D	275567501	275574000	6500	AA	AA	AA	AA	AA	AA	AA	AA	AA	AA	AA	AA	AA	Ad	AA	AA	Ad	Ad	AA	AA	AA	AA	AA	AA	Ad	AA	AA	AA	AA	AA	AB	AA	AA	AA	AA	AA	dd	AA	AA	AA	AA	AA	AA	AA	AA	AA
chr1D	275608501	275613000	4500	AA	AA	AA	AA	AA	AA	AA	AA	AA	AA	AA	AA	AA	AA	AA	AA	Ad	AA	AB	AA	AA	AA	AA	AB	AA	AA	AA	AB	AA	AA	AA	AA	AA	AA	AA	Ad	dd	Ad	AA	AA	AA	AA	AA	AA	AA	Ad
chr1D	275634001	275640000	6000	AA	AA	AA	Ad	AA	Ad	AA	AA	AA	Ad	Ad	Ad	AA	AA	AA	AA	AA	Ad	Ad	Ad	AA	AA	AA	AA	AA	AA	Ad	AA	AA	Ad	Ad	AA	AA	AA	AA	Ad	dd	Ad	Ad	Ad	AA	Ad	AA	Ad	Ad	Ad
chr1D	275772001	275779000	7000	AA	AA	AA	AA	AA	AA	AA	AA	AA	AA	AA	AA	AA	AA	AA	AA	AB	AA	AA	AA	AA	AA	AA	AB	AA	AA	AA	AA	AA	AA	AA	AA	AA	AA	AA	AA	AA	AA	AA	AA	AA	AA	AA	Ad	AA	AA
chr1D	275786501	275791000	4500	AA	AA	AA	AA	AA	AA	AA	AA	AA	AA	AA	AA	AB	AA	AA	AA	AA	AA	AA	AA	AA	AA	AA	AA	AA	AA	AA	AA	AA	AA	AA	AA	AA	AA	AB	AA	Ad	Ad	AA	AA	AA	Ad	AA	Ad	Ad	AA
chr1D	276227001	276237500	10500	AA	AA	AA	AA	Ad	AB	Ad	Ad	AA	AA	AA	AA	AA	AA	AA	AA	AA	Ad	AA	AA	AA	AA	AA	Ad	AA	AA	AA	AA	AA	AA	AA	AA	AA	Ad	AA	Ad	dd	AA	Ad	Ad	AA	AA	AA	AA	Ad	Ad
chr1D	276332001	276336500	4500	AA	Ad	AA	AA	AA	AA	AA	AA	AA	Ad	AA	AA	AA	AA	AA	AA	AA	AA	AA	AA	AA	AA	AA	AA	AA	AA	AA	AA	AA	AA	AA	AA	AA	AA	AA	Ad	Ad	AA	AA	AA	AA	AA	AA	AA	AA	AA
chr1D	276413501	276419000	5500	AB	AA	AA	AA	AA	AA	AB	AA	AB	AA	AA	AA	AA	AA	AA	dd	AA	AB	AA	AA	AB	AA	AA	AA	AA	AA	AA	AA	AA	AA	AA	Ad	AB	AA	AA	AA	AA	AB	AA	AA	AA	AA	AB	AA	AA	AB
chr1D	276679501	276684500	5000	Ad	AA	AA	Ad	Ad	Ad	AA	AA	Ad	AA	AA	AA	Ad	Ad	Ad	AA	AA	AA	Ad	AA	Ad	Ad	AA	Ad	AA	Ad	AA	AB	AA	Ad	AA	AA	AA	AA	AA	Ad	dd	AA	Ad	Ad	AA	Ad	Ad	Ad	Ad	Ad
chr1D	276812501	276816500	4000	AA	AA	AA	AA	AA	AA	Ad	AA	AA	AA	AA	AA	AA	AA	AA	AA	AA	AA	AA	Ad	AA	AA	AA	AA	AA	AA	AA	AA	AA	AA	AA	AA	AA	AA	AA	AA	dd	AA	AA	AA	AA	Ad	AA	AA	AA	AA
chr1D	276988501	276994500	6000	Ad	AA	AA	AA	AA	AA	AA	AA	AA	AA	AA	AA	AA	Ad	AA	AA	AA	AA	AA	AA	AA	AA	AA	AA	AA	Ad	AA	AA	AA	AA	AA	AA	AA	AA	AA	AA	dd	AA	AA	AA	AA	AA	AA	AA	AA	AA
chr1D	277031501	277035500	4000	AA	AA	AA	AA	AA	AA	AA	AA	AA	AA	AA	AA	AA	AA	AA	AA	AA	AA	AA	AA	AA	AA	AA	AA	AA	AA	AA	AB	AA	AA	AA	AA	AA	AA	AA	dd	AA	AA	AA	Ad	AA	AA	AA	AA	AA	AA
chr1D	277166501	277170500	4000	AA	AA	AA	AA	AA	AA	AA	AA	AA	Ad	AA	AA	AA	AA	AB	AA	AA	AA	AA	AA	AA	AA	AA	AA	AA	AA	AA	AA	AA	AA	AA	AA	AA	AB	AA	AB	dd	AA	AA	AA	AA	AA	AA	AA	AA	Ad
chr1D	277367501	277381000	13500	AA	AA	AA	AA	AA	AA	AA	AA	AA	AA	AA	AA	AA	AA	AA	AA	AA	AA	AA	AA	AA	AA	AA	AA	AA	AA	AA	AA	AA	AA	AA	AA	AA	AA	AA	Ad	AA	AB	AA	AA	AA	AA	Ad	AA	AA	AA
chr1D	277486501	277493000	6500	Ad	dd	dd	dd	dd	dd	dd	Ad	dd	dd	dd	Ad	dd	dd	dd	dd	dd	dd	dd	dd	dd	dd	dd	Ad	dd	dd	dd	dd	dd	dd	dd	dd	dd	dd	dd	dd	dd	dd	dd	dd	dd	dd	dd	dd	Ad	dd
chr1D	277666501	277680000	13500	AA	Ad	AA	AA	AA	AA	AA	AA	AB	dd	Ad	AA	AA	AA	dd	AA	AA	dd	AA	dd	AA	AA	AA	AA	AA	AA	AA	AA	dd	AA	AA	AA	dd	AA	AA	dd	AA	dd	dd	AB	AA	AA	AA	AA	AA	AA
chr1D	277895001	277905000	10000	AA	AA	AA	AA	AB	AA	AA	AA	AA	AA	AA	AA	AA	AB	AA	AA	AA	AB	AA	AA	AA	AA	AB	AA	AA	AA	AA	AA	AA	AA	AA	AA	AA	AB	AA	Ad	dd	AA	AA	Ad	AA	AA	AB	AA	AA	AA
chr1D	278001501	278006500	5000	Ad	AA	Ad	AA	AA	AA	Ad	Ad	Ad	Ad	Ad	dd	Ad	Ad	Ad	Ad	Ad	Ad	Ad	Ad	Ad	Ad	Ad	Ad	AA	Ad	Ad	AA	Ad	AA	AA	AA	Ad	AA	Ad	dd	Ad	AA	Ad	dd	AA	Ad	Ad	Ad	Ad	Ad
chr1D	278017501	278021500	4000	AB	AA	AA	AA	AA	AA	AB	AB	AA	AA	AA	AA	AA	AB	AA	AA	AA	AB	AA	AB	AA	AA	AB	AA	AA	AA	AA	AA	AB	AB	AB	AB	AB	AB	AA	Ad	dd	AA	AA	Ad	AA	Ad	AA	AA	AA	AA
chr1D	278036501	278041500	5000	AB	AB	AB	AB	AB	AB	AB	AB	AB	AB	AB	AB	AB	AB	BB	AA	BB	BB	AB	BB	AB	AB	AB	AB	AB	AB	AB	AB	AB	AB	AB	AB	BB	AB	AB	AA	dd	AB	AA	AB	AB	AA	AA	AA	AA	AA
chr1D	278135501	278139500	4000	AA	AA	AA	AA	AA	AA	AA	AA	AA	AA	AA	AA	AA	AA	AA	AA	AA	AA	AA	AA	AA	AB	AB	AA	AA	AA	AA	AA	AB	AA	AB	AA	AA	AA	AA	AA	dd	AA	AA	AA	AA	AA	AA	AA	AA	AB
chr1D	278296001	278313500	17500	AA	AA	AA	AA	dd	AA	AA	AA	AA	AA	AA	AA	AA	AA	AA	AA	AA	AA	AA	AA	AA	AA	AA	AA	AA	AA	AA	AB	AA	AA	AA	AA	AA	AA	AA	Ad	AA	AB	AA	Ad	AA	AA	AA	AA	AA	AA
chr1D	278658501	278663500	5000	AB	AB	AB	AB	BB	AB	AB	AB	AB	AB	AB	AB	AB	AB	AB	BB	AB	AB	AB	AB	AB	AB	AB	AB	BB	AB	AB	AB	BB	BB	AB	AB	BB	AB	AB	AB	Ad	BB	BB	AB	BB	AB	AB	AB	AB	AB
chr1D	278701501	278707500	6000	AA	AA	AA	AB	AA	AA	AA	AA	AA	AA	AA	AA	AA	AA	AA	AA	AA	AB	AA	AA	AA	AA	AB	AA	AA	AA	AA	AA	AA	AA	AA	AA	AA	AA	AA	AB	dd	AA	AA	AB	AA	AA	AA	AA	AA	AA
chr1D	278756001	278762000	6000	AA	AA	AA	AA	Ad	Ad	AA	AA	Ad	AA	AA	AA	AA	AA	Ad	AA	AA	AA	AA	Ad	AA	AA	Ad	AA	AA	AA	AA	Ad	AA	AA	AA	AA	Ad	AA	AA	AA	dd	Ad	AA	Ad	Ad	Ad	Ad	Ad	Ad	Ad
chr1D	278964001	278969000	5000	AA	Ad	AA	AA	AA	AA	AA	AA	Ad	Ad	AA	AA	AA	AA	AA	AA	AA	AA	AA	AA	AA	AA	AA	AA	AA	AA	AA	AB	AA	AA	AA	Ad	AA	AA	AA	Ad	dd	AA	AA	Ad	AA	Ad	AA	AA	AA	AA
chr1D	278978001	278984000	6000	dd	dd	Ad	Ad	dd	dd	dd	dd	dd	dd	dd	dd	dd	dd	dd	dd	dd	dd	dd	dd	dd	dd	dd	dd	dd	Ad	dd	dd	dd	dd	dd	dd	dd	dd	dd	dd	dd	dd	dd	dd	Ad	dd	dd	dd	Ad	Ad
chr1D	279069001	279085000	16000	AA	AA	AA	AA	AA	AA	AA	AA	AA	AA	AA	AA	AA	AA	AA	AA	AA	AA	AA	AA	AA	AA	AA	AA	AA	AA	AA	AA	AA	AA	AA	AA	AA	AA	AA	AB	dd	AA	AA	AA	AA	AA	AA	AA	AA	AA
chr1D	279335001	279340500	5500	AA	AA	AA	AA	AA	AB	AA	AA	AA	AA	AA	AA	AB	AA	AA	AA	AA	AA	AA	AA	AA	AA	AA	AA	AB	AA	AB	AB	AA	AA	AA	AA	AA	AA	AA	Ad	dd	AA	AA	Ad	AA	AA	AA	AA	AA	AA
chr1D	279447501	279451500	4000	AA	Ad	AA	AA	AA	Ad	Ad	AA	AA	AA	Ad	Ad	AA	Ad	AA	Ad	AA	AA	AA	AA	AA	Ad	AA	AA	AA	AA	AA	AA	AA	AA	AA	AA	AA	AA	AA	Ad	dd	Ad	Ad	Ad	AA	Ad	Ad	AA	Ad	Ad
chr1D	279584001	279592000	8000	AA	AA	AB	AA	AA	AA	AA	AA	AB	AA	AA	AA	AA	AA	AA	AA	AA	AA	AA	AA	AA	AA	AB	AA	AA	AA	AA	AA	AA	AA	AA	AA	AA	AA	AB	AA	dd	AA	AA	AA	AA	AA	AA	AA	AA	AA
chr1D	279613501	279617500	4000	AA	Ad	AA	AA	AA	AB	AA	AA	AB	AA	AB	AA	AA	AA	AA	AA	AA	AA	Ad	AA	AA	AA	AA	AA	AA	AA	AA	AA	AA	AA	AA	AA	AA	AA	AA	Ad	dd	AA	AA	Ad	AA	AA	AA	AA	AA	AA
chr1D	280174001	280189500	15500	AA	AA	AA	AA	AA	AA	AA	AA	AA	AA	AA	AA	AA	AA	AA	AA	AA	AA	AA	AA	AA	AA	AA	AA	AA	AA	AA	AA	AA	AA	AA	AA	AA	AA	AA	AB	dd	AA	AA	AA	AA	AA	AA	AA	AA	AB
chr1D	280541501	280548000	6500	AA	AA	AA	AA	AB	AA	AA	AA	AB	AB	AA	AA	AA	AA	AA	AA	AA	AB	AA	AA	AA	AA	AB	AA	AA	AA	AA	AA	AB	AA	AA	AA	AB	AB	AA	AA	dd	AA	Ad	Ad	AA	AA	AA	AA	Ad	AA
chr1D	281570501	281574500	4000	AA	AB	AB	AA	AB	AB	AB	AA	AA	AB	AA	AA	AB	AB	BB	AA	AB	AA	AA	AA	AA	AA	AA	AB	AB	AB	AA	AA	AA	AB	AB	AA	AB	BB	AB	AA	dd	AA	AA	AB	AA	AA	AA	AA	AA	AB
chr1D	281570501	281579500	9000	AB	AB	AB	AB	AB	AB	BB	AB	BB	AB	AB	AB	AB	AB	BB	AB	AB	AB	AB	BB	AB	AB	AB	AB	AB	BB	AB	AB	AB	AB	BB	AB	AB	BB	AB	AA	dd	BB	AB	AB	AB	AB	AB	AA	AB	AB
chr1D	281593501	281600500	7000	AA	AA	AA	AA	AA	AA	AA	AA	Ad	AA	AA	AA	AA	AA	AA	AA	AA	AA	AA	AA	AA	AA	AA	AA	AA	AA	AA	AA	AA	AA	AA	AA	AA	AA	AA	AA	dd	Ad	AA	Ad	AA	AA	AA	AA	AA	AA
chr1D	281719001	281724500	5500	AB	AB	AB	BB	AA	BC	AB	AA	BB	AA	BB	AB	BB	BB	BB	BB	AB	AB	AB	BB	BB	AB	AB	AB	AB	AB	AA	BB	BB	AB	AB	BB	BB	AB	AB	AA	dd	BC	BB	AA	BB	AA	BB	AB	BB	AB
chr1D	281740001	281744500	4500	AA	AA	AA	AA	AA	AA	AA	AA	AA	AA	AA	AB	AA	AA	AA	AA	AA	AA	AA	AA	AB	AA	AA	AA	AA	AB	AA	AA	AA	AA	AA	AA	AB	AA	AA	AA	dd	AA	AA	AA	AA	AA	AA	AA	AA	AB
chr1D	281751001	281755000	4000	AA	AA	AA	AA	AA	AA	AA	AA	AB	AA	AB	AB	AA	AA	AA	AA	AA	AA	AA	AA	AA	AA	AA	AB	AB	Ad	AA	AA	AA	AA	AA	AA	AA	AA	AA	AA	dd	AA	AA	AA	AA	AA	AA	AA	AA	AB
chr1D	282027001	282067500	40500	AA	AA	AA	AA	AA	AA	dd	AA	AA	AA	AA	AA	AA	AA	AA	AA	AA	AA	AA	AA	AA	AA	AA	AA	AA	AA	AA	AA	AA	AA	AA	AA	AA	AA	AA	AA	AA	AA	AA	AA	AA	AA	AA	AA	AA	AA
chr1D	282451001	282458500	7500	AA	AA	AA	AA	AA	AA	AA	AA	AA	AA	AA	AB	AA	AA	AA	AA	AA	AA	AA	AA	AA	AA	AA	AA	AA	AA	AA	AA	AA	AA	AA	AB	AA	AA	AA	AA	dd	AA	AA	AA	AA	AA	AA	AA	AA	AB
chr1D	282595001	282606000	11000	AA	AA	AA	AA	Ad	AA	Ad	AA	AA	AA	AA	AA	AA	Ad	AA	AA	AA	AA	AA	Ad	AA	AA	AA	AA	AA	AA	AA	AA	AA	AA	AA	AA	AA	AA	AA	AA	dd	AA	AA	AA	AA	AA	AA	AA	AA	AA
chr1D	282931001	282935000	4000	AA	Ad	AA	AA	Ad	Ad	AA	AA	Ad	AA	AA	AA	AA	AA	AA	AA	Ad	AA	AA	AA	Ad	AA	Ad	AA	AA	AA	AA	AA	AA	AA	AA	AA	AA	AA	AA	AB	dd	AA	AA	Ad	AA	Ad	AA	AA	AA	Ad
chr1D	283330001	283334000	4000	AA	AA	AA	AA	AA	AA	AA	AA	AA	AA	AA	AA	AA	AA	AA	AA	AA	AA	AA	AA	AA	AA	AA	AA	AA	AA	AA	AA	AA	AA	AA	AA	AA	AA	AA	AA	dd	AA	AA	AA	AA	AA	AA	AA	AA	AA
chr1D	283406501	283412000	5500	AA	AA	AA	AA	AB	AA	AA	AA	AA	AA	AB	AA	AA	AA	AA	AA	AA	AA	AA	AA	AA	AA	AA	AA	AA	AA	AA	AA	AA	AA	AA	AA	AA	AA	AA	AA	dd	AA	AA	AA	AA	AA	AB	AA	AA	AB
chr1D	283485001	283489500	4500	AA	AB	AA	AA	AA	AA	AA	AA	AA	AA	AB	AA	AA	AA	AA	AB	AA	Ad	AA	Ad	AA	AA	AA	AA	AA	AA	AA	AA	AA	AB	AA	AA	AA	AA	AA	AA	dd	Ad	Ad	AA	AA	Ad	AA	AA	AA	AA
chr1D	283511001	283517000	6000	Ad	AA	AA	AA	AA	AA	AA	Ad	Ad	AA	Ad	Ad	Ad	AA	Ad	Ad	Ad	AA	AA	AA	Ad	AA	Ad	Ad	AA	Ad	AA	Ad	AA	Ad	Ad	Ad	AA	AA	Ad	Ad	dd	Ad	Ad	Ad	Ad	Ad	Ad	Ad	Ad	Ad
chr1D	283807001	283831000	24000	AA	AA	AA	AA	AA	AA	AA	AA	AA	AA	AA	AA	AA	AA	AA	AA	AA	AA	AA	AA	AA	AA	AA	AA	AA	AA	AA	AA	AA	AA	AA	AA	AA	AB	AA	Ad	dd	AB	AA	AA	AA	AA	AA	AA	AA	AA
chr1D	284256001	284260500	4500	dd	dd	dd	dd	dd	dd	dd	dd	dd	dd	dd	dd	dd	dd	dd	dd	dd	dd	dd	dd	dd	dd	dd	dd	dd	dd	dd	dd	dd	dd	dd	dd	dd	dd	dd	dd	dd	dd	dd	dd	dd	dd	dd	dd	dd	dd
chr1D	284290001	284297500	7500	AA	AB	AA	AA	AA	AA	AA	AA	AA	AA	AA	AA	AA	AA	AA	AA	AA	AA	AA	AA	AA	AA	AA	AA	AA	AA	AA	AA	AA	AB	AA	AA	AA	AA	AA	AA	dd	AA	AA	AA	AA	AA	AA	AA	AA	AB
chr1D	284580001	284591500	11500	Ad	AA	Ad	Ad	Ad	Ad	Ad	Ad	Ad	AA	Ad	Ad	Ad	Ad	AA	Ad	Ad	Ad	Ad	Ad	Ad	Ad	AA	Ad	Ad	AA	Ad	Ad	Ad	AA	Ad	Ad	Ad	Ad	Ad	Ad	dd	Ad	Ad	Ad	Ad	Ad	Ad	Ad	Ad	Ad
chr1D	285006501	285012000	5500	AA	AA	AA	AA	AA	AA	AA	AA	AA	AA	AA	AA	AA	AA	AA	AA	AA	AA	AA	AA	AA	AA	AA	AA	AA	AA	AA	AA	AA	AA	AA	AA	Ad	AA	AA	AA	dd	AA	AA	AA	AA	AA	AA	AA	AA	AA
chr1D	285190001	285197500	7500	AA	AA	AA	Ad	AA	AA	Ad	AA	AA	AA	AA	AA	AA	AA	AA	AA	AA	AA	AA	AA	AA	AA	AA	AA	AA	AA	AA	AA	AA	AA	AA	AA	AA	AA	AA	AA	AA	AA	AA	AA	AA	AA	AA	AA	AA	AA
chr1D	285280501	285297500	17000	AA	AA	AA	AA	Ad	AA	AA	AA	AA	AA	AA	AA	AA	AA	AA	Ad	AA	AA	AA	AA	AA	AA	AA	AA	AA	Ad	dd	dd	AA	AA	AA	AA	Ad	AA	AA	Ad	dd	Ad	Ad	Ad	AA	Ad	AA	Ad	Ad	Ad
chr1D	285378501	285383000	4500	AA	AA	AA	AA	AA	AA	AA	AA	AA	AA	AA	AA	AA	AA	AA	AA	AA	AA	AA	AA	AA	AA	AA	AA	AA	AA	AA	AA	AA	AA	AA	AA	AA	AA	AA	AA	dd	AA	AA	AA	AA	AA	AA	AA	AA	AB
chr1D	285402501	285408000	5500	AA	AA	AA	AA	AB	AA	AA	AA	AA	AA	AA	AA	AA	AA	AA	AA	AA	AA	AA	AA	AA	AA	AA	AA	AA	AA	AA	AA	Ad	Ad	AA	AA	AA	AA	Ad	BB	AA	AA	AA	AA	AA	AA	Ad	AA	AA	AA
chr1D	285721001	285725000	4000	AB	AA	AA	AA	AA	AA	AA	AA	AB	AB	AA	AA	AA	AA	AA	AA	AA	AA	AA	AA	AA	AA	AA	AA	AA	AA	AA	AB	AA	AA	AA	AA	AA	AA	AA	dd	AA	AA	AA	Ad	AA	AA	AA	AA	AA	Ad
chr1D	286124501	286129000	4500	AA	AA	AA	AA	AA	AA	Ad	Ad	AA	AA	AA	AA	AA	AA	AA	AA	AA	AA	AA	AA	AA	AA	AA	AA	AA	AA	AA	AA	AA	AA	Ad	AA	Ad	AA	AA	AA	Ad	AA	Ad	Ad	AA	Ad	AA	AA	Ad	AA
chr1D	286216001	286220000	4000	AA	AA	AA	AA	AA	AA	AA	AA	AA	AA	AA	AA	AA	AA	AA	AA	AA	AA	AA	AA	AA	AA	AA	AB	AA	AB	AA	AA	AA	AA	AA	AA	AB	AA	AA	AA	dd	AA	AA	AB	AA	AA	AA	AA	AA	AA
chr1D	286418501	286423000	4500	AA	AB	AA	AA	AA	AA	AA	AA	AA	AA	AA	AB	AA	AA	AA	AA	AA	AA	AA	AB	AA	AA	AA	AA	AA	AA	AA	AA	AA	AA	AB	AA	AA	AA	AA	AB	dd	AA	AA	AB	AA	AA	AA	AA	AA	AA
chr1D	287006001	287014000	8000	AA	AB	AA	AA	AA	AA	AA	AA	AA	AA	AA	AA	AA	AA	AA	AA	AA	AA	AA	AA	AA	AA	AA	AA	AA	AA	AA	AA	AA	AA	AA	AA	AA	AA	AA	AA	AA	AA	AA	AA	AA	AA	AB	AA	AA	AA
chr1D	287105001	287109500	4500	AB	AA	AA	AA	AA	AA	Ad	AA	AB	AA	AA	AA	AA	AA	AA	AA	AA	AA	AA	AA	AA	AA	AA	AA	AA	AA	AA	AA	AA	AB	AA	AA	AA	AA	AA	Ad	AA	AB	AA	Ad	AA	Ad	AA	AA	AA	AA
chr1D	287203001	287213500	10500	AA	AA	AA	AA	AA	AA	AA	AA	AA	AA	AA	AA	AA	AA	AA	AA	AA	Ad	AA	AA	AA	AA	AA	AA	AA	AA	AA	AA	AA	AA	AA	AA	Ad	AA	AA	Ad	dd	Ad	AA	AA	AA	Ad	AA	AA	AA	AA
chr1D	287309001	287313500	4500	AA	AA	AA	AA	AA	AA	AB	AA	AB	AB	AA	AA	AA	AB	AA	AA	AA	AB	AA	AA	AB	AA	AA	AA	AA	AB	AA	BB	AB	AA	AB	AA	AB	AA	AA	dd	AA	AA	AA	Ad	AA	AA	AA	AA	AA	AA
chr1D	287329001	287343500	14500	AA	AA	AA	AA	AA	AA	AA	AA	AA	AA	AA	AA	AA	AA	AA	AA	AA	AA	AA	AA	AA	AA	AA	AA	AA	AA	AA	AA	AA	AA	AA	AA	AA	AA	AA	AA	AA	AA	AA	AA	AA	AA	AA	AA	AA	AA
chr1D	287670501	287676500	6000	AA	AA	AA	AA	AA	AA	AA	AA	AA	AA	AA	AA	AA	AA	AA	AB	AA	AA	AA	AA	AA	AB	AA	AA	AA	AA	AA	AA	AA	AA	AA	AA	AA	AA	AA	AA	dd	AA	AA	AB	AA	AA	AA	AA	AA	AA
chr1D	287687001	287694500	7500	AA	AA	AB	AA	AA	AA	AA	AA	AA	AA	AA	AB	AB	AA	AA	AA	AA	AA	AA	AA	AA	AA	AA	AA	AA	AA	AA	AA	AA	AA	AA	AB	AA	AA	AA	Ad	dd	AA	AA	AA	AA	AA	AB	AA	AA	AB
chr1D	287970001	287980000	10000	AA	AA	AA	AA	AA	AA	AA	AA	AA	AA	AA	AA	AA	AA	AA	AA	AA	AA	AA	AB	AA	AA	AA	AA	AA	AA	AA	AA	AA	AA	AA	AA	AA	AA	AA	AB	dd	AB	AA	AB	AA	AA	AA	AA	AA	AA
chr1D	288015001	288019500	4500	Ad	AA	Ad	AA	Ad	Ad	AA	Ad	AA	AA	AA	AA	Ad	AA	AA	Ad	Ad	AA	Ad	Ad	Ad	AA	Ad	AA	AA	AA	AA	AA	AA	AA	AA	AA	Ad	AA	AA	Ad	dd	Ad	Ad	Ad	AA	Ad	Ad	Ad	Ad	AA
chr1D	288168001	288187500	19500	AA	AA	AA	dd	AA	AA	AA	AA	AA	AA	AA	AA	AA	AA	AA	AA	AA	AA	AA	AA	AA	AA	AA	AA	AA	AA	AA	AB	AA	AA	AA	AA	AA	AA	AA	Ad	AA	AB	AA	dd	AA	AA	AA	AA	dd	dd
chr1D	288253001	288275500	22500	AA	AA	AA	AA	AA	AA	AA	AA	AA	AA	AA	AA	AA	AA	AA	AA	AA	AA	AA	AA	AA	AA	AA	AA	AA	AA	AA	AA	AA	AA	AA	AA	AA	AA	AA	AB	dd	AA	AA	AA	AA	AA	AA	AA	AA	AA
chr1D	288253001	288324500	71500	AA	AA	AA	AA	AA	AA	AA	AA	AA	AA	AA	AA	AA	AA	AA	AA	AA	AA	AA	AA	AA	AA	AA	AA	AA	AA	AA	AA	AA	AA	AA	AA	AA	AA	AA	AA	dd	AA	AA	AA	AA	AA	AA	AA	AA	AA
chr1D	288341001	288345000	4000	Ad	AA	AA	Ad	Ad	AA	Ad	Ad	AA	AA	AA	AA	AA	AA	AA	Ad	AA	Ad	AA	AA	AA	AA	AA	AA	AA	Ad	AA	AA	AA	AA	AA	Ad	AA	AA	AA	AA	Ad	Ad	Ad	Ad	AA	Ad	AA	Ad	Ad	AA
chr1D	288388501	288397500	9000	AA	AA	AA	AA	AA	AA	AA	AA	AA	AA	AA	AB	AA	AA	AA	AA	AA	AA	AA	AA	AA	AA	AB	AA	AA	AA	AA	AA	AA	AA	AA	AA	AA	AA	AA	AB	AA	AA	AA	AA	AA	AA	AA	AA	AA	AA
chr1D	288486501	288493500	7000	AA	Ad	Ad	AA	Ad	AA	AA	Ad	AA	Ad	Ad	AA	Ad	Ad	Ad	Ad	Ad	AA	Ad	AA	AA	AA	Ad	Ad	Ad	AA	Ad	Ad	AA	AA	AA	AA	Ad	Ad	Ad	AA	Ad	Ad	Ad	Ad	Ad	Ad	Ad	Ad	Ad	AA
chr1D	288867001	288871500	4500	AA	AA	AA	AA	AA	AA	AA	AA	AA	AA	AA	AA	AA	AA	AA	AA	AA	AA	AA	AA	AA	AA	AA	AA	AA	AA	AA	AA	AA	AA	AA	AA	AA	AA	AA	AB	dd	AA	AA	AB	AA	AA	AA	AA	AA	AA
chr1D	288969001	288973500	4500	AA	AB	AA	AB	AA	AB	AB	AA	AA	AA	AA	AA	AB	AB	AA	AA	AA	AA	AB	AB	AA	AA	AB	AB	AA	AA	AA	AB	AB	AA	AA	AB	AA	AB	AA	AA	dd	AB	AA	Ad	AA	Ad	AB	AA	AA	AB
chr1D	288974001	288979000	5000	AA	AA	AA	AA	AA	AA	AA	AA	AA	AB	AA	AA	AA	AB	AA	AA	AA	AB	AB	AB	AA	AA	AA	AA	AA	AA	AA	AA	AA	AA	AB	AA	AA	AB	AA	AA	dd	AA	Ad	Ad	AA	Ad	Ad	AA	Ad	Ad
chr1D	288976501	288981000	4500	AB	AA	AA	AA	AA	AA	AA	AA	AA	AB	AB	AA	AA	AA	AA	AA	AA	AA	AA	AB	AA	AA	AA	AA	AA	AA	AA	AA	AA	AA	AB	AA	AA	AB	AA	Ad	dd	AA	Ad	Ad	AA	Ad	AA	AA	Ad	Ad
chr1D	288988501	289034500	46000	AA	AA	AA	AA	AA	AA	AA	AA	AA	AA	AA	AA	AA	AA	AA	AA	AA	AA	AA	AA	AA	AA	AA	AA	AA	AA	AA	AA	AA	AA	AA	AA	AA	AA	AA	AA	dd	AA	AA	AA	AA	AA	AA	AA	AA	AA
chr1D	289125501	289131500	6000	BB	AA	AA	AA	AA	AA	AA	AA	AA	AA	AB	AA	AA	AA	AA	AA	AA	AA	AA	AA	AA	AA	AA	AA	AA	AA	AA	AA	AA	AB	AA	AA	AA	AA	AA	AB	dd	AA	AA	AB	AA	AA	AA	AA	AA	AA
chr1D	289211501	289217000	5500	AA	AA	AA	AA	AA	AA	AA	AA	AA	AA	AA	AA	AA	AA	AA	AA	AA	AA	AA	AA	AA	AA	AA	AA	AA	AA	AA	AB	AA	AA	AA	AA	AA	AA	AA	dd	AA	AA	AA	Ad	AA	AA	AA	AA	AA	AA
chr1D	289249001	289253500	4500	AA	AA	AA	Ad	AA	AA	Ad	AA	AA	AA	Ad	AA	AA	AA	Ad	AA	AA	Ad	Ad	AA	AA	AA	AA	AA	Ad	AA	AA	Ad	AA	Ad	AA	AA	AA	AA	AA	AA	dd	Ad	AA	AA	AA	Ad	Ad	Ad	Ad	Ad
chr1D	289412501	289417000	4500	AA	AA	AA	AA	AA	AA	AB	AA	AA	AA	AA	AA	AA	AA	AA	AB	AA	AA	AA	AA	AA	AA	AA	AA	AA	AA	AA	AA	AA	Ad	AA	AA	AA	AA	Ad	AB	dd	AA	AA	AB	AA	AB	Ad	AA	AA	Ad
chr1D	289412501	289429000	16500	AA	AA	AA	AA	AA	AA	AA	AA	AA	AA	AA	AA	AA	AA	AA	AA	AA	AA	AA	AA	AA	AA	AA	AA	AA	AA	AA	AA	AA	AA	AA	AA	AA	AA	AA	AB	dd	AA	AA	AA	AA	AA	AA	AA	AA	AA
chr1D	289984501	289991000	6500	AA	AA	AA	AA	AA	AA	Ad	Ad	AA	AA	AA	AA	AB	AA	AA	AA	AA	AA	AA	AA	AA	AA	AA	AA	AA	AA	AA	BB	AA	AA	AA	AA	AA	AA	AA	dd	AA	AA	AA	Ad	AA	Ad	AA	AA	AA	AA
chr1D	290168001	290175500	7500	AA	Ad	AA	AA	Ad	AA	AA	Ad	AA	AA	AA	AA	AA	AA	AA	AA	AA	AA	AA	AA	AA	AA	AA	AA	AA	AA	AA	AA	AA	AA	AA	AA	AA	AA	AA	AA	dd	AA	AA	AA	AA	AA	AB	AA	AA	AA
chr1D	290555501	290561000	5500	AA	AA	AB	AA	AA	AA	AA	AA	AA	AA	AA	AA	AA	AA	AA	AA	AA	AA	AB	AA	AA	AA	AA	AA	AA	AA	AA	AA	AA	AA	AA	AB	AA	AA	AA	AA	dd	AA	AA	AA	AA	AA	AA	AA	AA	AA
chr1D	290717501	290721500	4000	AA	AA	AA	AA	AA	AA	AA	AA	AA	AA	AA	AA	AA	Ad	AA	AA	AA	AA	AA	AA	AA	AA	AA	AA	AA	AA	AA	AA	AA	AA	AA	AA	AA	AA	AA	Ad	dd	Ad	Ad	Ad	AA	Ad	Ad	Ad	AA	Ad
chr1D	290871501	290879500	8000	AA	AA	AA	AA	AA	AA	AA	AA	AA	AA	AA	dd	dd	AA	AA	AA	dd	AA	AA	AA	AA	AA	AA	AA	AA	AA	AA	AA	AA	AA	AA	AA	AA	AA	AA	AA	AA	AA	AA	AA	AA	dd	dd	AA	AA	AA
chr1D	291032501	291045000	12500	Ad	Ad	Ad	Ad	Ad	Ad	Ad	Ad	Ad	Ad	Ad	Ad	Ad	AA	Ad	Ad	Ad	Ad	Ad	Ad	Ad	Ad	Ad	Ad	Ad	Ad	Ad	Ad	Ad	Ad	Ad	Ad	Ad	Ad	Ad	Ad	dd	Ad	Ad	Ad	Ad	Ad	Ad	Ad	Ad	Ad
chr1D	291233501	291238000	4500	AA	AA	AB	AA	AA	AA	AA	AA	AA	AA	AA	AA	AA	AA	AA	AA	AA	AA	AA	AA	AA	AA	AA	AA	AA	AA	AA	AA	AA	AA	AA	AA	AA	AA	AA	AA	dd	AA	AA	AA	AA	AA	AA	AA	AA	AA
chr1D	291244501	291257500	13000	AB	AA	AA	AA	AA	AB	AA	AA	AA	AA	AA	AA	AA	AA	AA	AA	AA	AA	AA	AA	AA	AB	AA	AA	AA	AA	AA	AA	AA	AA	AA	AA	AA	AA	AA	AA	dd	AA	AA	AA	AA	AA	AA	AA	AA	AA
chr1D	291424001	291430500	6500	AA	AA	AA	AA	AA	AA	AA	AA	AA	AA	AA	AA	AA	AA	AB	AA	AA	AA	AA	AA	AA	AA	AA	AA	AA	AA	AB	AA	AA	AA	AA	AA	AA	AA	AA	AA	dd	AA	AA	AA	AA	AA	AA	AA	AA	Ad
chr1D	291448501	291452500	4000	AA	AA	AA	AA	AA	AA	AA	AA	AA	AA	AA	AA	AA	AA	AA	AA	AA	AA	AA	AA	AA	AA	AA	AA	AA	AA	Ad	AA	AA	AA	AA	AA	AA	AA	AA	Ad	dd	AA	AA	AA	AA	AA	AA	AA	AA	Ad
chr1D	291497001	291501000	4000	Ad	AA	AA	Ad	Ad	Ad	Ad	Ad	Ad	Ad	AA	Ad	AA	Ad	Ad	AA	Ad	Ad	Ad	Ad	Ad	Ad	Ad	Ad	Ad	Ad	Ad	AB	Ad	Ad	Ad	Ad	Ad	Ad	Ad	dd	dd	AB	AA	Ad	Ad	AA	Ad	AA	Ad	Ad
chr1D	291946001	291961500	15500	AA	AA	AA	AA	AA	AA	AA	AA	AA	AA	AA	AA	AA	AA	AA	AA	AA	AA	AA	AA	AA	AA	AA	AA	AA	AA	AA	AA	AA	AA	AA	AA	AA	AA	AA	AA	dd	AB	AA	AA	AA	AA	AA	AA	AA	AA
chr1D	292974001	292978500	4500	AA	AA	AA	AA	AB	AA	AA	AB	AA	AA	AA	AA	AA	AA	AA	AA	AA	AB	AA	AA	AA	AB	AA	AA	AA	AA	AA	AA	AA	AA	AA	AA	AA	AA	AA	AB	AA	AA	AA	AB	AA	AA	AA	AA	AA	AA
chr1D	293023501	293040000	16500	Ad	Ad	Ad	Ad	Ad	Ad	Ad	Ad	Ad	Ad	dd	Ad	Ad	Ad	Ad	Ad	Ad	Ad	Ad	Ad	Ad	Ad	dd	Ad	Ad	Ad	Ad	Ad	Ad	Ad	Ad	Ad	Ad	Ad	Ad	dd	dd	Ad	dd	dd	Ad	dd	dd	dd	dd	Ad
chr1D	293163001	293174000	11000	AA	AA	AA	AA	AA	Ad	AA	Ad	AA	Ad	AA	AA	AA	AA	AA	AA	AA	AA	AA	AA	AA	AA	AA	AA	AA	dd	AA	AA	AA	Ad	AA	AA	AA	AA	Ad	AA	AA	AB	AA	AA	AA	AA	AA	AA	AA	AA
chr1D	293706001	293717500	11500	Ad	AA	Ad	AA	Ad	AA	Ad	AA	Ad	Ad	AA	Ad	Ad	AA	AA	Ad	Ad	AA	Ad	AA	Ad	AA	Ad	Ad	Ad	AA	Ad	Ad	AA	AA	AA	Ad	AA	AA	Ad	Ad	dd	Ad	Ad	Ad	Ad	Ad	dd	Ad	Ad	Ad
chr1D	293742001	293746000	4000	Ad	AA	AA	Ad	Ad	Ad	AA	AA	AA	Ad	AA	Ad	Ad	Ad	Ad	AA	AA	AA	Ad	Ad	Ad	AA	Ad	Ad	AA	AA	Ad	AA	AA	Ad	AA	AA	Ad	AA	AA	dd	dd	Ad	Ad	dd	Ad	Ad	Ad	Ad	Ad	Ad
chr1D	293851001	293856000	5000	Ad	Ad	Ad	Ad	Ad	Ad	Ad	Ad	Ad	Ad	Ad	Ad	Ad	Ad	Ad	dd	dd	Ad	dd	Ad	dd	dd	Ad	Ad	dd	Ad	Ad	Ad	Ad	Ad	Ad	Ad	Ad	Ad	Ad	Ad	Ad	dd	dd	dd	Ad	dd	dd	dd	dd	dd
chr1D	293919001	293923000	4000	Ad	Ad	Ad	Ad	Ad	Ad	AA	Ad	Ad	Ad	Ad	Ad	Ad	Ad	Ad	Ad	Ad	Ad	Ad	Ad	Ad	Ad	Ad	Ad	Ad	Ad	Ad	Ad	Ad	Ad	Ad	Ad	Ad	Ad	Ad	dd	Ad	Ad	Ad	Ad	Ad	Ad	Ad	Ad	dd	Ad
chr1D	293919001	293929000	10000	Ad	Ad	Ad	Ad	Ad	Ad	Ad	Ad	Ad	Ad	Ad	Ad	Ad	Ad	Ad	Ad	Ad	Ad	Ad	Ad	Ad	Ad	Ad	Ad	Ad	Ad	Ad	Ad	Ad	Ad	Ad	Ad	Ad	Ad	Ad	dd	Ad	dd	dd	dd	Ad	dd	dd	Ad	dd	dd
chr1D	293925001	293929500	4500	dd	dd	dd	dd	dd	dd	dd	dd	dd	dd	dd	dd	dd	dd	dd	dd	dd	dd	dd	dd	dd	dd	dd	dd	dd	dd	dd	dd	dd	dd	dd	dd	dd	dd	dd	dd	dd	dd	dd	dd	dd	dd	dd	dd	dd	dd
chr1D	294053501	294061000	7500	AA	AA	AA	AA	AA	AA	AA	AA	AA	AA	AA	AA	AA	AA	AA	AA	AA	AA	AA	AA	AA	AA	AA	AA	AA	AA	AA	AA	AA	AA	AA	AA	AA	AA	AA	AA	dd	AA	Ad	Ad	AA	AA	Ad	AA	AA	Ad
chr1D	294393501	294399500	6000	AA	AA	AA	AA	AB	AA	AA	AA	AA	AA	AA	AA	AA	AA	AA	AA	AA	AA	AA	AA	Ad	AA	AA	AA	AA	AA	AA	AA	Ad	AA	AA	AA	AA	AA	AA	AB	AA	Ad	AA	AA	AA	AA	Ad	AA	AB	Ad
chr1D	294569501	294574000	4500	AA	AB	AA	AA	AA	AA	AA	AA	AB	AA	AA	AA	AA	AB	AA	AA	AA	AA	AB	AA	AA	AA	AB	AA	AA	AB	AA	AA	AA	AA	AA	AA	AA	AB	AA	AA	dd	AA	AA	AA	AA	AA	AA	AA	AA	AA
chr1D	294953001	294958500	5500	dd	dd	dd	dd	dd	dd	dd	dd	dd	dd	dd	dd	dd	dd	dd	dd	dd	dd	dd	dd	dd	dd	dd	dd	dd	dd	dd	dd	dd	dd	dd	dd	dd	dd	dd	dd	dd	dd	dd	dd	dd	dd	dd	dd	dd	dd
chr1D	295172501	295176500	4000	Ad	Ad	Ad	Ad	Ad	Ad	Ad	Ad	Ad	Ad	Ad	Ad	Ad	Ad	Ad	Ad	Ad	Ad	Ad	Ad	Ad	Ad	dd	Ad	Ad	Ad	Ad	Ad	Ad	dd	Ad	Ad	Ad	Ad	Ad	Ad	dd	Ad	Ad	Ad	Ad	Ad	Ad	Ad	dd	Ad
chr1D	295324001	295328500	4500	Ad	Ad	Ad	Ad	Ad	Ad	Ad	Ad	Ad	Ad	Ad	Ad	Ad	Ad	Ad	Ad	Ad	Ad	Ad	Ad	Ad	Ad	Ad	Ad	Ad	Ad	Ad	AB	Ad	Ad	Ad	Ad	Ad	Ad	Ad	dd	AA	AA	AA	Ad	AA	Ad	Ad	Ad	Ad	AA
chr1D	295462501	295469500	7000	AA	AA	AA	AA	Ad	AA	AA	AA	AA	AA	AA	AA	AA	AA	AA	AA	AA	dd	AA	AA	AA	AA	AA	AA	AA	AA	AA	AA	AA	AA	AA	Ad	dd	AA	AA	dd	Ad	Ad	AA	AA	AA	AA	AA	AA	AA	AA
chr1D	295472501	295478000	5500	AA	Ad	AA	AA	AA	AA	AA	AA	AA	AA	AA	AA	AA	AA	AA	AA	AA	AA	AA	AA	AA	AA	AA	AA	AA	AA	Ad	AA	AA	AA	AA	AA	AA	AA	AA	AA	dd	AA	AA	AA	AA	AA	AA	AA	AA	AA
chr1D	295659001	295663500	4500	Ad	AA	AA	Ad	AA	AA	AA	AA	AA	Ad	AA	AA	Ad	AA	AA	AA	AA	AA	AA	AA	AB	Ad	AA	AB	AA	AA	AA	Ad	AA	Ad	Ad	AA	AA	Ad	AA	AA	AA	AA	AA	AB	AA	AB	AA	AA	AA	AA
chr1D	295768501	295784500	16000	AA	AA	AA	AA	AA	AA	AA	AA	AA	AA	AA	AA	AA	AA	AA	AA	AA	AA	AA	AA	AA	AB	AA	AA	AA	AA	AA	AA	AA	AA	AA	AA	AA	AA	AA	AA	dd	AA	AA	AA	AA	AA	AA	AA	AA	AA
chr1D	296997501	297003500	6000	AA	AA	AA	AA	AA	AA	AA	AA	AA	AA	AA	AA	AA	AA	AA	AA	AA	AA	AA	AA	AA	AA	AA	AA	AA	AA	AA	AA	AA	AA	AA	AA	AA	AA	AA	AB	dd	AA	AA	AB	AA	AA	AA	AA	AA	AA
chr1D	297277001	297283500	6500	dd	AA	AA	AA	AA	AA	AA	AA	AA	AA	AA	AA	AA	AA	AA	AA	AA	AA	AA	AA	Ad	AA	AA	AA	AA	AA	AA	AA	AA	AA	AA	AA	AA	AA	AA	Ad	AA	AA	AA	Ad	AA	AA	AA	AA	AA	AA
chr1D	297894001	297906000	12000	AA	AA	AA	AA	AA	AB	AA	AA	AA	AA	AA	AA	AA	AA	AA	AA	AA	AA	AA	AA	AA	AA	AA	AA	AA	AA	AA	AA	AA	AA	AA	AA	AA	AA	AA	AB	AA	AA	AA	AA	AA	AA	AA	AA	AA	AA
chr1D	299285001	299290000	5000	Ad	Ad	Ad	Ad	Ad	Ad	Ad	Ad	Ad	Ad	AA	Ad	AA	Ad	Ad	Ad	AA	Ad	Ad	Ad	Ad	Ad	AA	Ad	Ad	Ad	AA	Ad	Ad	Ad	AA	Ad	Ad	Ad	Ad	Ad	dd	Ad	Ad	Ad	Ad	Ad	Ad	Ad	Ad	Ad
chr1D	299292501	299297000	4500	dd	dd	dd	dd	dd	dd	dd	dd	dd	dd	dd	dd	dd	dd	dd	dd	dd	dd	dd	dd	dd	dd	dd	dd	dd	dd	dd	dd	dd	dd	dd	dd	dd	dd	dd	dd	dd	dd	dd	dd	dd	dd	dd	dd	dd	dd
chr1D	299841501	299849000	7500	AA	AA	AA	AA	AA	AA	AA	AA	AA	AA	AA	AA	AA	AA	AA	AA	AA	AB	AA	AA	AA	AA	AA	AA	AA	AA	AA	AA	AA	Ad	AA	AA	AA	AA	AA	AA	AA	AA	AA	AA	AA	AA	AA	AA	AA	AA
chr1D	300373001	300380000	7000	AA	AA	AA	AA	AA	AA	AA	AA	AA	AA	AA	AA	AA	AA	AA	AA	AA	AA	AA	AA	AA	AA	AA	AA	AA	AA	AA	AA	AA	AA	AA	AA	AA	AA	AA	AA	AA	AB	AA	AA	AA	AA	AB	AA	AA	AB
chr1D	300613001	300619500	6500	AA	AA	AA	AA	AA	AA	AA	AA	AA	AA	AA	AA	AA	AA	AA	AA	AA	AA	AA	AA	AA	AA	AA	AA	AA	AA	AA	AA	AA	AA	AA	AA	AA	AA	AA	AA	dd	AA	AA	AA	AA	AA	Ad	AA	Ad	AA
chr1D	300653001	300657000	4000	AA	AA	AA	AA	AA	AA	Ad	AA	Ad	AA	AA	AA	AA	AA	AA	AA	AA	AA	AA	AA	AA	AA	AA	AA	AA	AA	AA	AA	Ad	AA	AA	AA	AA	AA	AA	AA	dd	Ad	Ad	AA	AA	AA	Ad	AA	AA	AA
chr1D	301086001	301102000	16000	AA	AA	AA	AA	AA	AA	AA	AA	AA	AA	AA	AA	AA	AA	AA	AA	AA	AA	AA	AA	AA	AA	AA	AA	AA	AA	AA	AA	AA	AA	AA	AA	AA	AA	AA	AA	AA	AA	AA	AA	AA	AA	AA	AA	AA	AA
chr1D	301983501	301997000	13500	Ad	Ad	Ad	Ad	Ad	AA	Ad	Ad	Ad	Ad	Ad	Ad	Ad	Ad	Ad	Ad	Ad	Ad	Ad	Ad	Ad	AA	AA	Ad	Ad	Ad	Ad	Ad	AA	Ad	Ad	Ad	Ad	Ad	Ad	Ad	dd	Ad	Ad	Ad	Ad	Ad	Ad	Ad	Ad	Ad
chr1D	302282501	302312000	29500	AA	AA	AA	AA	AA	AA	AA	AA	AA	AA	AA	AA	AA	AA	AA	AA	AA	AA	AA	AA	AA	AA	AA	AA	AA	AA	AA	AA	AA	AA	AA	AA	AA	AA	AA	AA	AA	AA	AA	AA	AA	AA	AA	AA	AA	AA
chr1D	302799001	302803500	4500	AA	AA	Ad	Ad	Ad	Ad	AA	Ad	Ad	Ad	AA	Ad	Ad	Ad	AA	AA	Ad	Ad	Ad	Ad	Ad	Ad	Ad	Ad	AA	AA	Ad	Ad	Ad	Ad	AA	Ad	Ad	AA	AA	dd	AA	Ad	Ad	Ad	AA	Ad	Ad	Ad	Ad	Ad
chr1D	302929001	302940500	11500	Ad	Ad	Ad	Ad	Ad	AA	AA	Ad	Ad	Ad	AA	Ad	AA	Ad	AA	Ad	Ad	Ad	Ad	Ad	AA	AA	Ad	AA	Ad	Ad	Ad	Ad	Ad	Ad	Ad	Ad	AA	AA	AA	Ad	dd	AA	AA	AA	Ad	AA	AA	Ad	AA	AA
chr1D	302935501	302940500	5000	dd	dd	dd	dd	dd	dd	dd	dd	dd	dd	dd	dd	dd	dd	dd	dd	dd	dd	dd	dd	dd	dd	dd	dd	dd	dd	dd	dd	dd	dd	dd	dd	dd	dd	dd	dd	dd	dd	dd	dd	dd	dd	dd	dd	dd	dd
chr1D	302949001	302953000	4000	dd	dd	dd	dd	dd	dd	dd	dd	dd	dd	dd	dd	dd	dd	dd	dd	dd	dd	dd	dd	dd	dd	dd	dd	dd	dd	dd	dd	dd	dd	dd	dd	dd	dd	dd	dd	dd	dd	dd	dd	dd	dd	dd	dd	dd	dd
chr1D	303475001	303634000	159000	AA	AA	AA	AA	AA	AA	AA	AA	AA	AA	AA	AA	AA	AA	AA	AA	AA	AA	dd	AA	AA	AA	AA	AA	AA	AA	AA	AA	AA	AA	AA	AA	AA	AA	AA	AA	AA	AA	AA	AA	AA	AA	AA	AA	AA	AA
chr1D	303686501	303707500	21000	AA	AA	AA	AA	AA	AA	AA	AA	AA	AA	AA	AA	AA	AA	AA	AA	AA	AA	AA	AA	AA	AA	AA	AA	AA	AA	AA	AA	AA	AA	AA	AA	AA	AA	AA	AA	dd	AA	AA	AA	AA	AA	AA	AA	AA	AA
chr1D	303718501	303724000	5500	AA	AA	AA	AA	AA	AA	AA	AA	AA	AA	AA	AA	AA	AA	AA	AA	AA	AA	AA	AA	AA	AA	AA	AA	AA	AA	AA	AA	AA	AA	AA	Ad	AA	AA	AA	Ad	dd	AA	Ad	AA	AA	Ad	Ad	Ad	Ad	AA
chr1D	303955001	303960500	5500	AA	AA	AA	AA	AA	AA	AA	AA	AA	AA	AA	AA	AA	AA	AA	AA	AA	AA	AA	AA	AA	AA	AA	AA	AA	AA	AA	AA	AA	AA	AB	AA	AA	AA	AA	Ad	dd	AA	AA	AA	AA	Ad	AA	AA	AA	Ad
chr1D	304025501	304030000	4500	AA	AA	AA	AA	Ad	dd	AA	AA	AA	AA	AA	Ad	AA	AA	AA	AA	AA	Ad	AA	AA	AA	Ad	Ad	AA	Ad	AA	Ad	AB	AA	AA	AA	AA	AA	AA	AA	Ad	Ad	AA	AA	Ad	AA	AA	AA	AA	AA	AA
chr1D	304166501	304170500	4000	AA	AA	Ad	AA	AA	AA	AA	AA	AA	AA	AA	AA	AA	Ad	AA	AA	AA	Ad	AA	AA	AA	AA	AA	AA	AA	AA	AA	AA	AA	AA	AA	AA	AA	AA	AA	AA	dd	Ad	AA	AA	AA	AA	AA	AA	AA	AA
chr1D	304206501	304230500	24000	AA	AA	AA	AA	AA	AA	AA	AA	AA	AA	AA	AA	AA	AA	AA	AA	AA	AA	AA	AA	AA	AA	AA	AA	AA	AA	AA	AA	AA	AA	AA	AA	AA	AA	AA	AA	AA	AB	AA	Ad	AA	AA	AA	AA	AA	AA
chr1D	304441501	304446500	5000	dd	dd	dd	dd	dd	dd	dd	dd	dd	dd	dd	dd	dd	dd	dd	dd	dd	dd	dd	dd	dd	dd	dd	dd	dd	dd	dd	dd	dd	dd	dd	dd	dd	dd	dd	dd	dd	dd	dd	dd	dd	dd	dd	dd	dd	dd
chr1D	304568501	304583000	14500	AA	AA	AA	AA	AA	AA	AA	AA	AA	AA	AA	AA	AA	AA	AA	AA	AA	AA	AA	AA	AA	AA	AA	AA	AA	AA	AA	AB	AA	AA	AA	AA	AA	AA	AA	Ad	AA	AB	AA	AA	AA	AA	AA	AA	AA	AA
chr1D	304777501	304781500	4000	AA	Ad	AA	AA	AA	AA	AA	AA	AA	AA	AA	AA	AA	Ad	AA	AA	AA	AA	AA	AA	AA	AA	AA	AA	AA	AA	AA	Ad	AA	AA	AA	AA	AA	AA	AA	AA	dd	Ad	AA	AA	AA	Ad	Ad	Ad	AA	Ad
chr1D	305009001	305015000	6000	Ad	Ad	Ad	Ad	Ad	Ad	Ad	Ad	Ad	Ad	Ad	Ad	Ad	AA	Ad	AA	Ad	Ad	Ad	Ad	AA	Ad	AA	Ad	Ad	Ad	Ad	Ad	Ad	Ad	Ad	Ad	Ad	AA	Ad	Ad	dd	Ad	Ad	Ad	Ad	Ad	Ad	Ad	Ad	Ad
chr1D	305058501	305064500	6000	AA	AA	AA	AA	AA	AA	AA	AA	AA	AA	AA	AA	AA	AA	AA	AA	AA	AA	AA	AA	AA	AA	AA	Ad	AA	AA	AA	AA	AA	AA	AA	AA	AA	AA	AA	Ad	dd	AA	AA	Ad	AA	AA	AA	Ad	AA	AA
chr1D	305169001	305181500	12500	AA	AA	AA	AA	AA	AA	AA	AA	AA	AA	AA	AA	AA	AA	AA	AA	AA	AA	AA	AA	AA	AA	AA	AA	AA	AA	AA	AA	AA	AA	AA	AA	AA	AA	AA	AA	AA	AA	AA	AA	AA	AA	AA	AA	AA	AA
chr1D	305383001	305388500	5500	AA	AA	AA	AA	AA	AA	AA	AA	AA	AA	AA	AA	AA	AA	AA	AA	AA	AA	AA	AA	AA	AA	Ad	Ad	AA	AA	AA	AB	AA	Ad	AA	AA	Ad	AA	AA	Ad	dd	AB	AA	Ad	AA	AA	AA	AA	AA	Ad
chr1D	305650501	305654500	4000	AA	AA	AA	AB	AA	AA	AA	AA	AA	AB	AA	AA	AA	AA	AA	AA	AA	AA	AA	AA	AA	AB	AA	AA	AA	AB	AA	AA	AA	AB	AA	AA	AA	AA	AA	AB	Ad	Ad	AA	AA	AA	AA	Ad	AA	AA	AA
chr1D	305972501	305985500	13000	AA	AA	Ad	AA	AA	AA	AA	AA	AA	AA	Ad	AA	AA	AA	Ad	AA	AA	AA	Ad	AA	AA	AA	AA	AA	Ad	AA	AA	AB	AA	AA	AA	Ad	AA	AA	AA	dd	dd	AA	Ad	dd	AA	Ad	Ad	Ad	Ad	Ad
chr1D	306111501	306118000	6500	AA	AA	AA	AA	AA	AA	AA	AA	AA	AA	AA	AA	AA	AA	AA	AA	AA	AA	AA	AA	AA	AA	AA	AA	AA	AA	AA	AA	AA	AA	Ad	AA	AA	AA	Ad	AB	dd	AA	AA	AA	AA	AA	AA	AA	AA	AB
chr1D	306163001	306168000	5000	AA	AA	AA	Ad	dd	AA	AA	AA	AA	AA	AA	AA	AA	Ad	AA	AA	AA	AA	AA	AA	AA	AA	AA	AA	AA	AA	AA	AA	AA	AA	AA	AA	AA	AA	Ad	AA	Ad	AA	AA	AA	AA	AA	AA	AA	AA	AA
chr1D	306293501	306299500	6000	AA	AA	AA	AA	AA	AA	AA	AA	AA	AA	AA	AA	AA	AA	AA	AA	AA	AB	AA	AA	AA	AA	AA	AA	AA	AA	AA	AA	AA	AA	AA	AA	AA	AA	AA	AB	dd	AA	AA	AA	AA	AA	AA	AA	AA	AA
chr1D	306415001	306419500	4500	AA	AB	AA	AA	AA	AA	AA	AA	AB	AA	AA	AA	AA	AA	AA	AA	AA	AA	AA	AB	AA	AA	AA	AA	AA	AA	AA	AA	AA	AA	AA	AA	AA	AA	AA	Ad	dd	AA	AA	AA	AA	AA	AA	AA	AA	AA
chr1D	306877001	306881500	4500	AB	AB	BB	BB	AB	AB	AB	AB	BB	BB	BB	BB	AA	BB	BB	AB	Ad	AB	AB	AB	AA	BB	AB	AB	BB	Ad	AB	BC	AB	AB	AB	BB	AB	AB	AB	AA	dd	BB	AB	AB	BB	Ad	AA	AB	AB	AA
chr1D	306952501	306962500	10000	AA	AA	AA	AA	AA	AA	AA	Ad	AA	AA	AA	AA	AA	AA	AA	AA	AA	AA	AA	AA	AA	AA	AA	AA	AA	AA	AA	AA	AA	AA	AA	AA	AA	AA	AA	AA	dd	AA	Ad	Ad	AA	AA	AA	AA	Ad	AA
chr1D	307045001	307050000	5000	AA	AA	AB	AA	AA	AA	AA	AA	AA	AA	AA	AA	AA	AB	AA	AA	AA	AA	AA	AB	AA	AA	AA	AA	AA	AB	AA	AA	AA	AA	AA	AB	AA	AA	AA	AA	dd	AA	AA	AA	AA	AA	AA	AA	AA	Ad
chr1D	307114501	307119000	4500	AA	AA	AA	AA	AA	AA	AA	AA	AA	AA	AA	AA	AA	AA	AA	AA	AA	AA	AA	AA	AA	dd	dd	AA	AA	AA	AA	AA	AA	AA	AA	AA	AA	AA	AA	AB	AA	AA	AA	AA	AA	AA	AA	AA	AA	AA
chr1D	307393501	307397500	4000	dd	dd	dd	dd	dd	dd	dd	dd	dd	dd	dd	dd	dd	dd	dd	dd	dd	dd	dd	dd	dd	dd	dd	dd	dd	dd	dd	dd	dd	dd	dd	dd	dd	dd	dd	dd	dd	dd	dd	dd	dd	dd	dd	dd	dd	dd
chr1D	307537001	307544000	7000	AA	AA	AA	AA	AA	AA	AA	AA	AA	AA	AA	AA	AA	AA	AA	AA	Ad	AA	AA	AA	AA	AA	AA	AA	AA	AA	AA	BB	AA	AA	Ad	AA	AA	AA	AA	dd	Ad	AA	AA	Ad	AA	Ad	AA	AA	AA	AA
chr1D	308621001	308625500	4500	AA	AA	AA	AA	AA	AA	AA	AA	AA	AA	AA	AA	AA	AA	AA	AA	AA	AA	AA	Ad	AA	AA	AA	AA	AA	AA	AA	AA	AA	AB	AA	AA	AA	AA	AA	AA	dd	AB	AA	AA	AA	AA	AA	AA	AA	Ad
chr1D	308627501	308632500	5000	AA	AA	AA	AA	AB	AA	AA	AA	AA	AA	AA	AA	AA	AA	AA	AA	AB	AB	AA	AA	AA	AA	AA	AB	AA	AA	AA	AA	AA	AA	Ad	AB	AA	AA	AA	AA	Ad	AA	AA	AA	AA	AA	AA	AA	AA	Ad
chr1D	308811501	308816000	4500	AA	AA	AA	AA	AA	AA	AA	AA	AA	AA	AA	Ad	AA	AA	AA	AA	AA	AB	AB	AA	AA	AA	AA	AA	AA	AA	AA	AA	AA	AB	AA	AA	AA	AA	AA	Ad	dd	AA	Ad	Ad	AA	AA	AA	AA	Ad	AA
chr1D	308848001	308881000	33000	AA	AA	AA	AA	AA	AA	AA	AA	AA	AA	AA	AA	AA	AA	AA	AA	AA	AA	AA	AA	AA	AA	AA	AA	AA	AA	AA	AA	AA	AA	AA	AA	AA	AA	AA	AA	dd	AA	AA	AA	AA	AA	AA	AA	AA	AA
chr1D	309295001	309299000	4000	AA	AA	AA	AA	AA	AA	AA	AA	AB	AB	AA	AA	AA	AB	AA	AA	AB	AB	AA	AA	AA	AB	AB	AA	AA	AA	AA	AB	AB	AB	AA	AB	AA	AB	AA	Ad	dd	AA	Ad	Ad	AA	Ad	Ad	Ad	Ad	Ad
chr1D	309370001	309374500	4500	Ad	Ad	Ad	AA	Ad	Ad	AA	Ad	AA	AA	Ad	Ad	Ad	Ad	Ad	Ad	Ad	Ad	Ad	AA	Ad	Ad	AA	Ad	Ad	Ad	Ad	Ad	AA	Ad	Ad	Ad	AA	Ad	Ad	Ad	dd	Ad	Ad	Ad	Ad	Ad	Ad	Ad	Ad	Ad
chr1D	309553001	309557000	4000	dd	dd	dd	dd	dd	dd	dd	dd	dd	dd	dd	dd	dd	dd	dd	dd	dd	dd	dd	dd	dd	dd	dd	dd	dd	dd	dd	dd	dd	dd	dd	dd	dd	dd	dd	dd	dd	dd	dd	dd	dd	dd	dd	dd	dd	dd
chr1D	309766001	309770500	4500	Ad	Ad	AA	AA	Ad	AA	AA	Ad	Ad	AA	AA	Ad	AA	AA	AA	AA	Ad	AA	Ad	Ad	Ad	AA	Ad	AA	AA	AA	Ad	AA	AA	AA	Ad	AA	AA	AA	AA	AA	AA	AA	AA	AA	AA	AA	AA	AA	AA	AA
chr1D	309787501	309803500	16000	AA	AA	AA	AA	AA	AA	AA	AA	AA	AA	AA	AA	AA	AA	AA	AA	AA	AA	AA	AA	AA	AA	AA	AA	AA	AA	AA	AA	AA	AA	AA	AA	AA	AA	AA	AA	AA	AA	AA	AA	AA	AA	AA	AA	AA	AA
chr1D	310610501	310621500	11000	AA	Ad	AA	AA	AA	AA	AA	AA	AA	AA	AA	Ad	AA	AA	AA	AA	AA	AA	Ad	AA	AA	AA	AA	Ad	Ad	AA	AA	AA	AA	Ad	AA	AA	AA	Ad	Ad	Ad	dd	Ad	Ad	Ad	Ad	Ad	Ad	Ad	Ad	Ad
chr1D	311512501	311518000	5500	Ad	Ad	Ad	Ad	Ad	AA	Ad	Ad	Ad	Ad	Ad	Ad	Ad	Ad	Ad	Ad	Ad	Ad	Ad	Ad	Ad	Ad	Ad	Ad	Ad	Ad	Ad	Ad	Ad	Ad	Ad	Ad	Ad	Ad	Ad	Ad	dd	Ad	Ad	Ad	Ad	Ad	dd	Ad	Ad	dd
chr1D	311514001	311523000	9000	Ad	Ad	Ad	Ad	Ad	AA	Ad	Ad	Ad	Ad	Ad	Ad	Ad	Ad	Ad	Ad	Ad	Ad	Ad	Ad	Ad	Ad	Ad	Ad	Ad	Ad	Ad	Ad	Ad	Ad	Ad	Ad	Ad	Ad	Ad	Ad	Ad	Ad	Ad	Ad	Ad	Ad	Ad	Ad	Ad	dd
chr1D	311908001	311912000	4000	dd	dd	dd	dd	Ad	dd	dd	Ad	Ad	Ad	Ad	Ad	Ad	dd	Ad	Ad	dd	Ad	Ad	Ad	Ad	Ad	Ad	Ad	Ad	dd	dd	Ad	dd	Ad	Ad	Ad	Ad	dd	Ad	dd	dd	dd	dd	dd	Ad	dd	dd	dd	dd	dd
chr1D	312353501	312360000	6500	AA	AB	AA	AB	AA	AA	AA	AA	AA	AB	AA	AA	AB	AA	AA	AA	AB	AA	AA	AA	AA	AA	AA	AA	AA	AA	AB	AA	AB	AB	AA	AA	AA	AA	AA	Ad	dd	AA	AA	AA	AA	AA	AA	AA	AA	AA
chr1D	312812501	312816500	4000	dd	dd	dd	dd	dd	dd	dd	dd	dd	dd	dd	dd	dd	dd	dd	dd	dd	dd	dd	dd	dd	dd	dd	dd	dd	dd	dd	dd	dd	dd	dd	dd	dd	dd	dd	dd	dd	dd	dd	dd	dd	dd	dd	dd	dd	dd
chr1D	313036501	313040500	4000	AB	AA	AA	AA	AB	AB	AA	AB	AB	AA	AA	AA	AA	AA	AA	AA	AA	AA	AA	AA	AA	AA	AB	AA	AA	AA	AA	AB	AA	AB	AB	AA	AB	AB	AA	AA	AA	AB	AA	Ad	AA	AA	AA	AA	AA	AA
chr1D	313216501	313224000	7500	AA	Ad	AA	AA	AA	AA	AA	AA	AA	AA	dd	dd	AA	AA	AA	dd	AA	AA	AA	AA	AA	AA	AA	AA	AA	AA	AA	AA	AA	AA	AA	AA	AA	AA	AA	AA	AA	AA	AA	AA	AA	AA	AA	AA	AA	AA
chr1D	313505501	313510500	5000	AA	AB	AB	AA	AA	AA	AA	AA	AA	AA	AB	AA	AB	AA	AA	AA	AA	AA	AA	AB	AA	AA	AA	AA	AA	AA	AB	AB	AA	AA	AA	AA	AA	AA	AA	dd	Ad	AB	Ad	Ad	AA	Ad	AA	AA	AA	AA
chr1D	314031501	314040500	9000	AA	AA	AA	AA	AA	AA	AA	AA	AA	AA	AA	AA	AA	AA	AA	AA	AA	AA	AA	AA	AA	Ad	AA	AA	AA	AA	AA	AA	AA	AA	AA	AA	AA	Ad	AA	AA	dd	Ad	AA	AA	AA	AA	Ad	Ad	AA	Ad
chr1D	314105501	314112000	6500	Ad	AA	Ad	Ad	AA	AA	Ad	Ad	Ad	Ad	Ad	Ad	AA	AA	Ad	Ad	Ad	Ad	Ad	Ad	Ad	Ad	Ad	Ad	Ad	Ad	Ad	AB	Ad	Ad	Ad	Ad	AA	AA	Ad	dd	AA	AB	AA	Ad	AA	Ad	AA	AA	Ad	AA
chr1D	315014001	315019500	5500	Ad	AA	AA	AA	Ad	dd	AA	AA	AA	Ad	AA	AA	AA	AA	AA	AA	AA	AA	Ad	AA	Ad	AA	AA	AA	AA	AA	AA	AA	Ad	Ad	AA	Ad	AA	AA	AA	AA	AA	Ad	AA	AA	AA	Ad	AA	Ad	AA	AA
chr1D	315402501	315407000	4500	AA	AA	AA	AA	AA	AA	AA	AA	AB	AA	AA	AA	AA	AA	AA	AA	AA	AA	AA	AA	AA	AA	AA	AA	AA	AA	AA	AA	AA	AA	Ad	AA	AA	AA	AA	AB	dd	AA	AA	AA	AA	AA	AB	AA	AA	AA
chr1D	315888001	315901000	13000	AA	AA	AA	AA	AA	AA	AA	AA	AA	AA	AA	AA	AA	AA	AA	AA	AA	AA	AA	AA	AA	AA	AA	AA	AA	AA	AA	AA	AA	AA	AA	AA	AA	AA	AA	AA	dd	AA	AA	AA	AA	AA	AA	AA	AA	AA
chr1D	316162001	316166000	4000	AA	AA	AA	AA	AA	AB	AA	AA	AA	AA	AA	AA	AA	AB	AA	AA	AA	AA	AA	AA	AA	AA	AA	AA	AB	AA	AA	AB	AA	AA	AA	Ad	AA	AA	AA	Ad	AA	AA	AA	Ad	AA	AA	AB	AA	AA	AB
chr1D	316515501	316526000	10500	AA	AA	AA	AA	AA	AB	AA	AA	AA	AA	AA	AB	dd	AA	AA	AA	dd	AA	AA	AA	AA	AA	AB	AA	AA	AA	AA	AA	AA	AA	AA	AA	AA	AA	AA	AB	AA	AA	AA	AB	AA	dd	dd	AA	AA	dd
chr1D	317044001	317056500	12500	AA	AA	AA	AA	AA	AA	AA	AA	AA	AA	AA	AA	AA	AA	AA	AA	AA	AA	AA	AA	AA	AA	AA	dd	AA	AA	AA	AA	AA	AA	AA	AA	AA	AA	AA	Ad	AA	AA	AA	AA	AA	AA	AA	AA	AA	AA
chr1D	317183501	317190000	6500	AA	AA	AA	Ad	AA	Ad	AA	AA	AA	AA	AA	AA	AA	AA	AA	AA	AA	AA	AA	AA	AA	AA	AA	AA	AA	AA	AA	AA	AA	AA	AA	AA	Ad	AA	AA	AB	AA	AA	AA	AA	AA	AA	AA	AA	AA	AA
chr1D	317399001	317404500	5500	AA	AA	AA	AA	AA	AA	AA	AA	AA	AA	AA	AA	AA	AA	AA	AA	AA	AA	AA	AA	AA	AA	AA	AA	AA	AA	AA	AA	AA	AA	AA	AA	AA	AA	AA	AA	AA	AA	AA	AA	AA	AA	AA	AA	AA	AA
chr1D	317804501	317809000	4500	AB	AA	AA	AA	AA	AB	AA	AA	AA	AA	AA	AA	AA	AA	AA	AA	AA	AA	Ad	AA	AA	AA	AA	AA	AA	AA	AA	AB	AA	AA	AA	AA	AA	AA	AA	dd	AA	AB	AA	Ad	AA	Ad	AA	AA	Ad	AA
chr1D	318006001	318017500	11500	AA	Ad	AA	AA	AA	AA	AA	Ad	AA	AA	AA	AA	Ad	Ad	AA	Ad	Ad	AA	AA	AA	Ad	Ad	Ad	Ad	Ad	Ad	AA	Ad	Ad	Ad	Ad	Ad	Ad	AA	AA	Ad	dd	Ad	Ad	Ad	AA	Ad	Ad	Ad	Ad	Ad
chr1D	318023501	318028500	5000	AA	AA	AA	AA	AA	AA	AA	AA	AA	AA	AA	AA	dd	AA	AA	AA	dd	AA	AA	AA	AA	AA	AA	AA	AA	dd	AB	AA	AA	AA	AA	AA	AA	AA	AA	AA	AA	AA	AA	AA	AA	dd	dd	AA	AA	dd
chr1D	318071001	318077000	6000	AA	AA	AA	AA	AA	AA	AA	AA	AA	AA	AB	AB	AB	AA	AA	AA	AA	AA	AA	AA	AA	AA	AA	AA	AA	AA	AA	AA	AA	AA	AA	AA	AA	AA	AA	AA	AA	AA	AA	AA	AA	AA	AA	AA	AA	AA
chr1D	318413501	318418000	4500	Ad	AA	Ad	Ad	Ad	Ad	Ad	AA	Ad	AA	AA	Ad	Ad	Ad	Ad	Ad	Ad	Ad	Ad	Ad	AA	Ad	Ad	Ad	Ad	Ad	Ad	Ad	Ad	Ad	AA	Ad	Ad	Ad	Ad	Ad	Ad	dd	Ad	Ad	Ad	Ad	Ad	Ad	Ad	Ad
chr1D	318666501	318672500	6000	AA	AA	AA	AA	AA	AA	AA	AA	AA	AA	AA	AA	AA	AA	AA	AA	AA	AA	AA	AB	AA	AA	AA	AA	AA	AA	AA	AB	AA	AA	AA	AA	AA	AA	AA	Ad	AA	AA	AA	AA	AA	AA	AA	dd	AA	AA
chr1D	318913001	318918500	5500	AA	AA	AA	AA	AA	AA	AA	AA	AA	AA	AA	AA	AA	AA	AA	AA	AA	AA	AA	AA	AA	AA	AA	AA	AA	AA	AA	AA	AA	AA	AA	AA	AA	AA	AA	AB	dd	AA	AA	AA	AA	AA	AA	AA	AA	AA
chr1D	319221501	319226500	5000	AA	AA	AA	AA	AA	Ad	Ad	AA	AA	AA	AA	AA	AA	AA	AA	AA	AA	AA	AA	AA	AA	AA	AA	Ad	AA	AA	AA	AA	AA	AA	Ad	AA	AA	AA	AA	AA	AA	AA	AA	AA	AA	AA	AB	AA	AA	AA
chr1D	320063001	320074000	11000	AA	AA	AA	AA	AA	AA	AA	dd	AA	AA	AA	AA	AA	AA	AA	AA	AA	AA	AA	AA	AA	AA	AA	AA	AA	AA	AA	AA	AA	AA	AA	AA	AA	AA	AA	AA	AA	AB	AA	AA	AA	AA	AA	AA	AA	AA
chr1D	320610501	320616500	6000	AA	AA	AA	AA	AA	AA	AA	dd	AA	AA	AA	AA	AA	AA	AA	AA	AA	AA	AA	AA	AA	Ad	AA	AA	AA	AA	AA	AA	AA	AA	AA	AA	AA	AA	AA	AA	AA	Ad	Ad	AA	AA	AA	AA	Ad	Ad	Ad
chr1D	320816001	320821000	5000	Ad	Ad	Ad	Ad	Ad	Ad	Ad	Ad	Ad	Ad	Ad	Ad	Ad	Ad	Ad	Ad	Ad	Ad	Ad	Ad	Ad	Ad	Ad	Ad	Ad	Ad	Ad	Ad	Ad	Ad	Ad	Ad	Ad	Ad	Ad	dd	Ad	Ad	Ad	dd	Ad	Ad	dd	dd	dd	Ad
chr1D	320909501	320913500	4000	dd	dd	dd	dd	dd	dd	dd	dd	dd	dd	dd	dd	dd	dd	dd	dd	dd	dd	dd	dd	dd	dd	dd	dd	dd	dd	dd	dd	dd	dd	dd	dd	dd	dd	dd	dd	dd	dd	dd	dd	dd	dd	dd	dd	dd	dd
chr1D	321033501	321038500	5000	AA	AA	AA	AA	AA	AA	AA	AA	AA	AA	AA	AA	AA	AA	AA	AA	AA	AA	AA	AA	AA	AA	AA	Ad	AA	AA	AA	AB	AA	AA	AA	AA	AA	AA	AA	dd	AA	AA	AA	Ad	AA	AA	AA	AA	AA	AA
chr1D	321241501	321245500	4000	Ad	Ad	dd	dd	Ad	dd	Ad	Ad	Ad	Ad	Ad	Ad	Ad	Ad	Ad	dd	dd	dd	dd	dd	Ad	dd	dd	dd	Ad	Ad	Ad	dd	dd	Ad	Ad	Ad	dd	dd	Ad	dd	Ad	dd	dd	Ad	dd	dd	dd	dd	dd	dd
chr1D	321361501	321365500	4000	AA	AA	AA	AA	AA	AA	AA	AA	AA	AA	AA	AA	AA	AA	AA	AA	AA	AA	AA	AA	AA	AA	AA	AA	AA	AA	AA	AA	AA	AA	AA	AA	AA	AA	AA	AB	dd	AA	AA	AA	AA	AA	AA	AA	AA	AA
chr1D	321555001	321560000	5000	AA	AB	AB	AA	AA	AB	AB	AB	AB	AB	AB	AB	AB	AA	AB	AA	AA	AA	AA	AA	AB	AA	AB	AA	AB	AB	AA	AA	AA	AA	AA	AA	AB	AA	AA	AA	Ad	AA	AA	AA	AA	AB	AB	AA	AA	AB
chr1D	321561501	321566000	4500	AB	AB	AA	AA	AB	AB	AB	AA	AA	AB	AB	AB	AB	AA	AB	AA	AA	AB	AA	AB	AB	AB	AB	AA	AB	AB	AB	AA	AB	AB	AA	AB	AB	AA	AB	AA	dd	AA	AA	AA	AA	AA	AA	AA	AA	AA
chr1D	321687501	321692500	5000	AA	AA	AA	AA	AA	AA	Ad	AA	AA	AA	AA	AA	AA	AA	AA	AA	AA	AA	AA	AA	Ad	Ad	AA	AA	AA	AA	Ad	AA	AA	AA	Ad	AA	AA	dd	AA	AA	AA	Ad	Ad	Ad	AA	Ad	Ad	Ad	AA	Ad
chr1D	322426501	322509000	82500	AA	AA	AA	AA	AA	AA	AA	AA	AA	AA	AA	AA	AA	AA	AA	AA	AA	AA	AA	AA	AA	AA	AA	AA	AA	AA	AA	AA	AA	AA	AA	AA	AA	AA	AA	AA	dd	AA	AA	AA	AA	AA	AA	AA	AA	AA
chr1D	322760501	322775500	15000	AA	AA	AA	AA	AA	AA	AA	AA	AA	AA	AA	Ad	AA	AA	AA	AA	AA	AA	Ad	AA	AA	AA	AA	Ad	AA	AA	AA	AA	AA	AA	AA	AA	AA	AA	AA	Ad	dd	AA	AA	Ad	AA	AA	Ad	AA	AA	AA
chr1D	323001001	323007500	6500	AA	AA	AA	AA	AA	Ad	AA	dd	AA	AA	AA	AA	AA	AA	AA	AA	AA	AA	AA	AA	AA	AA	AA	AA	AA	AA	AA	AA	AA	AA	AA	AA	AA	AA	Ad	AA	AA	AA	AA	AA	AA	AA	AA	AA	AA	AA
chr1D	323559501	323567500	8000	AA	AA	AA	AA	AA	AA	AA	AA	AA	AA	AA	AA	AA	AA	AA	AA	AA	AA	AB	AA	AA	AA	AA	AA	AA	AA	AA	AA	AA	AA	AA	AA	AA	AA	AA	AB	dd	AA	AA	AB	AA	AA	Ad	AA	AA	AA
chr1D	324574001	324578000	4000	Ad	AA	Ad	AA	Ad	AA	Ad	AA	Ad	Ad	Ad	Ad	Ad	AA	AA	AA	Ad	Ad	Ad	Ad	AA	Ad	AA	Ad	Ad	AA	Ad	AA	Ad	Ad	AA	Ad	Ad	AA	Ad	dd	Ad	Ad	Ad	Ad	AA	Ad	Ad	Ad	Ad	Ad
chr1D	324851001	324862000	11000	Ad	AA	AA	AA	AA	AA	AA	AA	AA	AA	AA	AA	AA	AA	AA	AA	AA	AA	AA	AA	AA	AA	AA	Ad	AA	AA	AA	AA	AA	AA	AA	AA	AA	AA	AA	Ad	dd	AA	Ad	Ad	AA	Ad	AA	Ad	Ad	AA
chr1D	324975001	324980500	5500	AA	AA	AB	AA	AA	AA	AA	dd	AA	AA	AA	AA	Ad	AA	AA	AA	AA	AA	AA	Ad	AA	AA	AA	AA	Ad	AA	AA	AA	AA	AA	AA	AA	AA	AA	AA	AA	AA	AA	AA	AA	AA	AA	Ad	AA	AA	AA
chr1D	325287001	325292000	5000	AA	AA	AA	AA	AA	AA	AA	AA	AA	AA	AA	AA	AB	AB	AA	AA	AB	AB	AA	AA	AA	AA	AA	AA	AA	AA	AA	AA	AA	AA	AA	AA	AA	AB	AA	Ad	AA	AB	AA	Ad	AA	AA	AA	AA	AA	AA
chr1D	325946501	325957000	10500	AA	AA	AA	AA	AA	AA	AA	AA	AB	AA	AA	AA	AA	AA	AA	AA	AB	AA	AA	AA	AA	AA	AA	AA	AA	AA	AA	AB	AA	AB	AA	AA	AA	AA	AA	AA	dd	AB	AA	AA	AA	AA	AA	AA	AA	AA
chr1D	325953001	325957000	4000	Ad	AA	AA	Ad	AA	AA	AA	Ad	AA	Ad	Ad	AA	AA	AA	AA	AA	AB	AA	AA	AA	Ad	AA	AA	Ad	Ad	Ad	Ad	AB	Ad	AA	AA	Ad	Ad	AA	Ad	AA	dd	AB	AA	Ad	AA	AA	AA	AA	AA	Ad
chr1D	326678001	326687000	9000	Ad	Ad	Ad	Ad	Ad	Ad	Ad	Ad	Ad	Ad	Ad	Ad	Ad	Ad	AA	AA	Ad	AA	Ad	Ad	Ad	Ad	Ad	Ad	Ad	Ad	Ad	Ad	Ad	Ad	Ad	Ad	Ad	AA	Ad	Ad	dd	Ad	Ad	Ad	Ad	Ad	Ad	Ad	Ad	Ad
chr1D	327036001	327040000	4000	Ad	AA	Ad	AA	AA	AA	AA	AA	AA	AA	AA	AA	Ad	AA	AA	AA	Ad	AA	AA	AA	Ad	Ad	AA	AA	AA	AA	AA	Ad	Ad	Ad	AA	Ad	AA	Ad	AA	Ad	Ad	AA	AA	Ad	AA	Ad	AA	AA	AA	AA
chr1D	327139501	327148000	8500	Ad	AA	AA	AA	AA	AA	AA	AA	AA	AA	AA	AA	AA	AA	AA	AA	AA	AA	AA	AA	AA	AA	AA	AA	AA	AA	AA	AA	AA	AA	AA	Ad	AA	AA	AA	Ad	dd	AA	Ad	Ad	AA	Ad	Ad	AA	AA	AA
chr1D	327144001	327148500	4500	dd	Ad	AA	AA	AA	Ad	AA	AA	AA	Ad	AA	Ad	AA	AA	AA	Ad	AA	AA	dd	Ad	AA	AA	AA	Ad	AA	Ad	Ad	AA	Ad	AA	AA	AA	Ad	AA	Ad	Ad	dd	AA	dd	Ad	AA	Ad	AA	Ad	Ad	Ad
chr1D	327151001	327163500	12500	AA	AA	AA	AA	AA	AA	AA	AA	AA	AA	AA	AA	AA	AA	AA	AA	AA	AA	AA	AA	AA	AA	AA	AA	AA	AA	AA	AA	AA	AA	AA	AA	AA	AA	AA	AA	dd	AA	AA	AA	AA	AA	AA	AA	AA	AA
chr1D	327159501	327163500	4000	AA	AA	AA	AA	AA	AA	AA	Ad	AA	AA	AA	AA	AA	AA	AA	AA	AA	AB	AA	AA	AA	AA	AA	AA	AA	AA	AA	Ad	Ad	AA	AA	Ad	AA	AA	AA	Ad	dd	AA	AA	AA	AA	Ad	AA	AA	Ad	AA
chr1D	327290501	327297000	6500	AA	AA	Ad	AA	AA	AA	AA	Ad	AA	AA	AA	AA	AA	AA	AA	Ad	Ad	Ad	Ad	Ad	Ad	Ad	Ad	AA	AA	Ad	AA	AB	AA	AA	AA	AA	AA	AA	AA	Ad	Ad	AB	AA	Ad	AA	Ad	Ad	AA	Ad	Ad
chr1D	327334501	327340000	5500	AA	AA	BB	AA	AA	AA	AA	AA	AA	AA	AA	AA	AA	AA	AA	AA	AA	AA	AA	AA	AA	AA	AA	AA	AA	AB	AA	AA	AA	AA	AA	AA	AA	AA	AA	AA	Ad	AA	AA	AA	AA	AA	AA	AA	AA	Ad
chr1D	327376501	327382000	5500	AA	AA	AA	AA	AA	AA	AB	AA	AA	AA	AA	AA	AA	AA	AA	AA	AA	AA	AA	AA	AA	AA	AA	AA	AA	AA	AA	AA	AA	AA	AA	AA	AA	AA	AA	AA	dd	AB	AA	AA	AA	AA	AA	AA	AA	AA
chr1D	327481001	327486000	5000	AA	AA	AA	AA	AA	AA	AA	AA	AA	AA	AA	AA	AA	AA	AA	AA	AA	AA	AA	AA	AA	AA	AA	AA	AA	AA	Ad	AA	AA	AA	AA	AA	AA	AA	AA	Ad	dd	AB	AA	Ad	AA	AA	AA	AA	AA	AA
chr1D	327491001	327496000	5000	AA	AA	AA	AA	AA	AA	AA	AA	AA	AA	AA	AA	AA	AA	AA	AA	AA	AA	AA	AA	AA	AA	AA	AA	AA	AA	AA	AA	AA	AA	AA	AB	AA	AA	AA	AA	dd	AA	AA	AA	AA	AA	AA	AA	AA	AA
chr1D	327622001	327626000	4000	AA	AA	AA	AA	AA	AA	AA	AA	AA	AA	AA	AB	AA	AA	AA	AA	AA	AA	AA	AB	AA	AA	AA	AA	AA	AA	AA	AA	AA	AA	AA	AA	AA	AA	AA	AA	AA	AB	AA	AA	AA	AA	AA	AA	AA	AA
chr1D	327773501	327779000	5500	AA	AA	AA	AA	AA	AA	AA	AA	AA	AA	AA	Ad	AA	AA	AA	AA	AA	AA	AA	Ad	Ad	AA	AA	AA	AA	AA	AA	AA	Ad	AA	AA	Ad	AA	AA	AA	AA	dd	Ad	AA	AA	AA	AA	Ad	Ad	AA	Ad
chr1D	327858501	327867500	9000	AA	AA	AA	AA	AA	AA	AA	AA	AA	AA	AA	AA	AA	AA	AA	AA	AA	AA	AA	AA	AA	AA	AA	AA	AA	AA	AA	AA	AA	AA	AA	AA	AA	AA	AA	Ad	dd	AA	AA	AA	AA	AA	AB	AA	AA	AA
chr1D	327945001	327949000	4000	AA	AA	AA	AA	AB	AA	AA	AA	AA	AA	AB	AA	AA	AA	AA	AA	AA	AA	AA	AA	AB	AA	AA	AA	AB	AA	AA	AB	AA	AA	AA	AA	AA	AA	AA	Ad	dd	AA	AA	Ad	AA	AA	AA	AA	AA	AA
chr1D	327945001	327957500	12500	AB	AB	AA	AA	AB	AA	AA	AA	AA	AA	AB	AA	AA	AA	AA	AB	AA	AA	AA	AA	AB	AB	AA	AA	AA	AA	AA	AB	AA	AA	AA	AA	AA	AA	AA	Ad	dd	AB	AA	AA	AA	AA	AA	AA	AA	AB
chr1D	327952001	327957500	5500	AB	AB	AA	AA	AA	AA	AA	AA	AB	AA	AB	AB	AA	AA	AB	AB	AA	AB	AA	AA	AA	AB	AB	AA	AA	AB	AA	AB	AA	AA	AA	AB	AA	AB	AB	AA	dd	AA	AA	AA	AB	AA	AB	AA	AA	AB
chr1D	327973501	327978000	4500	AA	AA	AA	AA	AA	Ad	AA	AA	AA	AA	AA	AA	AA	AA	AA	AA	AA	AA	Ad	AA	AA	Ad	AA	AA	AA	AA	AA	AA	AA	AA	AA	AA	AA	AA	AA	Ad	Ad	AA	Ad	Ad	AA	AA	Ad	AA	Ad	Ad
chr1D	328027001	328032500	5500	AA	AA	AA	AA	AA	AA	AA	AA	AA	AA	AA	AA	AA	AB	AA	AA	AA	AA	AA	AA	Ad	AA	AA	AA	AA	AA	AA	AA	AA	AA	Ad	AA	AA	AA	AA	AA	dd	AA	AA	AA	AA	AA	AA	AA	AA	AA
chr1D	328462001	328467500	5500	AA	AA	Ad	AA	AA	AA	AA	AA	AA	Ad	Ad	AA	AA	Ad	AA	AA	AA	AA	AA	AA	Ad	AA	AA	AA	Ad	AA	AA	Ad	AA	AA	AA	Ad	AA	AA	AA	Ad	dd	Ad	Ad	Ad	AA	Ad	Ad	Ad	Ad	Ad
chr1D	328596501	328605500	9000	AA	AA	AA	AA	AA	AB	AA	AA	AA	AA	AA	AA	AA	AA	AB	AA	AA	AA	AA	AA	Ad	AA	AA	Ad	AA	AA	AA	AB	AA	AA	AA	AA	AA	AB	AA	Ad	dd	AA	AA	Ad	AA	AA	AA	AA	Ad	AA
chr1D	328658001	328664500	6500	AA	AA	AA	AA	AA	AA	AA	AA	AA	AA	AA	AA	AA	AA	AA	AA	AA	AA	AA	AA	AA	AA	AA	AA	AA	AA	AA	AA	Ad	AA	AA	AA	AA	AA	AA	AA	dd	AA	AA	AA	AA	AA	AA	AA	AA	AA
chr1D	328864001	328868000	4000	AA	AA	AA	AA	AA	AA	AA	AA	AA	AA	AA	AA	Ad	AA	AA	AA	AA	AA	AA	AA	AA	AA	AA	AA	AA	AA	AB	Ad	Ad	AA	AA	AA	AA	AA	AA	AA	dd	Ad	AA	AA	AA	AA	AA	AA	AA	Ad
chr1D	328864001	328873000	9000	AA	AA	AA	AA	AA	AA	AA	AA	AA	AA	AA	AA	Ad	AA	AA	AA	AA	AA	AA	AA	AA	AA	AA	AA	AA	AA	AA	AA	Ad	AA	AA	AA	AA	AA	AA	Ad	dd	Ad	Ad	AA	AA	AA	Ad	AA	AA	Ad
chr1D	328914501	328936500	22000	AA	AA	AA	AA	AA	AA	AA	AA	AA	AA	AA	AA	AA	AA	AA	AA	AA	AA	AA	AA	AA	AA	AA	AA	AA	AA	AA	AA	AA	AA	AA	AA	AA	AA	AA	AA	dd	AA	AA	AA	AA	AA	AA	AA	AA	AA
chr1D	329502001	329516000	14000	AA	AA	AA	AA	dd	AA	AA	AA	AA	AA	AA	AA	AA	AA	AA	AA	AA	AA	dd	AA	AA	AA	AA	AA	AA	AA	AA	AA	AA	AA	AA	AA	AA	AA	AA	AA	Ad	AA	AA	AA	AA	AA	AA	AA	AA	AA
chr1D	329644501	329649000	4500	Ad	Ad	Ad	Ad	Ad	Ad	Ad	Ad	Ad	Ad	Ad	Ad	Ad	Ad	Ad	Ad	Ad	Ad	Ad	Ad	Ad	Ad	Ad	Ad	Ad	Ad	Ad	AB	Ad	Ad	Ad	Ad	Ad	Ad	dd	dd	dd	AB	Ad	Ad	AA	Ad	Ad	Ad	Ad	Ad
chr1D	330725001	330730500	5500	AA	Ad	Ad	AA	Ad	Ad	Ad	Ad	Ad	Ad	Ad	AA	Ad	Ad	Ad	Ad	Ad	Ad	AA	Ad	Ad	Ad	Ad	Ad	AA	Ad	Ad	Ad	Ad	Ad	AA	Ad	Ad	Ad	Ad	Ad	dd	Ad	Ad	Ad	Ad	Ad	Ad	Ad	Ad	Ad
chr1D	334203501	334208500	5000	AA	AA	AA	AA	AA	AA	AA	AA	AA	AA	AA	AA	AA	AA	AA	AA	AA	AA	AA	AA	AA	AA	AA	AA	AA	AA	AA	AA	AA	AA	AA	AA	AA	AA	AA	Ad	dd	AA	AA	AA	AA	AA	AA	AA	AA	Ad
chr1D	334420001	334424000	4000	AA	AA	AA	AA	AA	AA	AA	AA	AA	AA	AA	AA	AA	AA	AA	AA	AA	AA	AB	AA	AA	AA	AA	AA	AA	AA	AA	AA	AA	AA	AA	AA	AA	AA	AA	AA	dd	AA	AA	AA	AA	AA	AA	AA	AA	AA
chr1D	334917001	334933000	16000	dd	AA	AA	AA	AA	AA	AA	AA	AA	AA	AA	AA	AA	AA	AA	AA	AA	AA	AA	AA	AA	AA	AA	AA	AA	AA	AA	AA	AA	AA	AA	AA	AA	AA	AA	AB	dd	AA	AA	AA	AA	AA	AA	AA	AA	AA
chr1D	335087501	335092000	4500	AA	AB	AA	AA	AB	AA	AA	AA	Ad	AA	AA	AA	AA	AA	AA	AA	AA	AA	Ad	AA	AB	AA	AA	AA	AA	AA	AA	AA	AA	AA	AA	AA	AA	AA	AA	Ad	dd	AA	AA	AA	AA	Ad	AA	AA	AA	Ad
chr1D	335470501	335485500	15000	AA	AA	AA	AA	AA	AA	AA	AA	AA	AA	AA	AA	AA	AA	AA	AA	AA	AA	AA	AA	AA	AA	AA	AA	AA	AA	AA	AA	AA	AA	AA	AA	AA	AA	AA	AA	AA	AA	AA	AA	AA	AA	AA	AA	AA	AA
chr1D	335983001	335988500	5500	AA	AA	AA	AA	AA	AA	dd	AA	AA	AA	AA	AA	AA	AA	AA	AA	AA	AA	AA	AA	AA	AA	AA	AA	AA	AA	AA	AA	AA	AA	AA	AA	AA	AA	AA	AA	AA	AA	AA	AA	AA	AA	AA	AA	AA	AA
chr1D	336176501	336180500	4000	AA	AA	AA	AA	AA	AA	AA	AA	AA	AA	AA	AA	AA	AA	AA	AA	AA	AA	AA	AA	AA	AA	AA	AA	AA	AA	AA	AA	AA	AA	AA	AA	AA	AA	AA	AA	dd	AA	AA	AA	AA	AA	AA	AA	AA	AA
chr1D	336745501	336750500	5000	Ad	dd	dd	Ad	Ad	dd	Ad	Ad	dd	Ad	Ad	Ad	Ad	dd	Ad	dd	Ad	Ad	Ad	dd	Ad	Ad	Ad	Ad	dd	Ad	dd	dd	Ad	Ad	Ad	dd	Ad	Ad	dd	dd	dd	dd	dd	dd	Ad	dd	dd	dd	dd	dd
chr1D	336784001	336789500	5500	AA	AA	AA	AA	AA	AA	AA	AA	AA	AA	AA	AA	AA	AA	AA	AA	AA	AA	AA	AA	AA	AA	AA	AA	AA	AA	AA	AA	AA	AA	AA	AA	AA	AA	AA	AB	AA	AA	AA	AA	AA	AA	AA	AA	AA	AA
chr1D	337924001	337928500	4500	Ad	Ad	Ad	Ad	Ad	Ad	Ad	Ad	Ad	Ad	Ad	AA	Ad	Ad	Ad	Ad	Ad	Ad	Ad	Ad	Ad	Ad	Ad	Ad	Ad	Ad	Ad	Ad	Ad	Ad	Ad	Ad	AA	Ad	Ad	Ad	dd	Ad	Ad	Ad	Ad	Ad	dd	Ad	dd	dd
chr1D	338984001	338989500	5500	AA	AA	AA	AA	AA	AA	AA	AB	AA	AA	AA	AA	AA	AA	AB	AA	AA	AA	AA	AA	AA	AA	AA	AA	AA	AA	AA	AA	AA	AA	AA	AA	AA	AA	AA	AA	dd	Ad	Ad	AA	AA	AA	Ad	AA	Ad	Ad
chr1D	339839501	339852000	12500	AA	AA	Ad	AA	AA	AA	AA	AA	AA	AA	AA	Ad	AA	AA	AA	AA	AA	AA	AA	AA	AA	AA	AA	AA	AA	AA	AA	AB	AA	AA	AA	AA	AA	AA	AA	Ad	AA	AB	AA	Ad	AA	AA	AA	AA	AA	AA
chr1D	340161001	340173000	12000	Ad	Ad	AA	Ad	Ad	Ad	Ad	Ad	Ad	AA	Ad	Ad	Ad	AA	Ad	Ad	Ad	Ad	Ad	Ad	Ad	Ad	Ad	Ad	Ad	AB	Ad	Ad	Ad	Ad	Ad	Ad	Ad	Ad	Ad	Ad	dd	AA	Ad	Ad	Ad	Ad	Ad	Ad	Ad	Ad
chr1D	340607001	340611500	4500	Ad	Ad	Ad	Ad	Ad	Ad	Ad	Ad	Ad	Ad	Ad	Ad	dd	dd	dd	AA	Ad	Ad	Ad	Ad	Ad	dd	Ad	Ad	Ad	Ad	Ad	Ad	Ad	Ad	Ad	Ad	Ad	dd	Ad	Ad	dd	dd	Ad	Ad	Ad	Ad	dd	Ad	Ad	dd
chr1D	340615001	340624500	9500	dd	dd	dd	dd	dd	dd	dd	dd	dd	dd	dd	dd	dd	dd	dd	dd	dd	dd	dd	dd	dd	dd	dd	dd	dd	dd	dd	dd	dd	dd	dd	dd	dd	dd	dd	dd	dd	dd	dd	dd	dd	dd	dd	dd	dd	dd
chr1D	340784001	340788500	4500	Ad	Ad	Ad	Ad	Ad	Ad	Ad	Ad	Ad	Ad	Ad	Ad	Ad	Ad	Ad	Ad	Ad	Ad	Ad	Ad	Ad	Ad	Ad	Ad	Ad	Ad	Ad	Ad	Ad	Ad	Ad	Ad	Ad	Ad	Ad	dd	Ad	Ad	Ad	Ad	Ad	Ad	Ad	Ad	Ad	Ad
chr1D	340877001	340883500	6500	AA	AA	AA	AA	AA	AA	AA	AA	AA	AA	AA	Ad	AA	AA	AA	AA	AA	Ad	Ad	AA	AA	AA	Ad	AA	AA	AA	AA	AA	AA	AA	AA	AA	AA	AA	AA	Ad	AA	AA	Ad	Ad	AA	Ad	AA	AA	Ad	Ad
chr1D	341189001	341194500	5500	AA	AA	AA	AA	AA	AA	AA	AA	AA	dd	AA	AA	AA	AA	AA	AB	AA	AA	AA	dd	AA	AA	AA	AA	AA	AA	AA	AA	dd	AA	AA	AA	AA	AA	AA	Ad	AA	AA	AA	AA	AA	AA	AA	AA	AA	AA
chr1D	341741001	341756000	15000	Ad	dd	dd	Ad	Ad	dd	Ad	Ad	dd	Ad	Ad	Ad	dd	Ad	Ad	Ad	dd	Ad	Ad	dd	Ad	dd	Ad	Ad	Ad	dd	Ad	Ad	dd	Ad	Ad	Ad	dd	Ad	Ad	dd	dd	dd	dd	dd	Ad	dd	dd	dd	dd	dd
chr1D	342797001	342801000	4000	AA	AA	AB	AA	AA	AA	AA	AA	AA	AA	AA	AA	AA	AA	AA	AA	AA	AA	AA	AA	AB	AA	AA	AA	AA	AA	AA	Ad	AA	AB	AB	AA	AA	AA	AA	AB	AA	AA	AA	AB	AA	AA	Ad	AA	AA	Ad
chr1D	343058501	343077500	19000	AA	AA	dd	AA	AA	AA	AA	AA	AA	AA	AA	AA	AA	AA	AA	AA	AA	AA	AA	AA	AA	AA	AA	AA	AA	AA	AA	AB	AA	AA	AA	AA	AA	AB	AA	AA	AA	AB	AA	AA	AA	AA	AA	AA	AA	AA
chr1D	343423501	343427500	4000	Ad	Ad	AA	Ad	AA	AA	Ad	Ad	AA	AA	AA	Ad	AA	AA	AA	Ad	AA	Ad	Ad	Ad	Ad	AA	AA	AA	Ad	AA	Ad	AA	Ad	AA	AA	AA	AA	AA	AA	Ad	AA	AA	Ad	Ad	Ad	AA	Ad	Ad	AA	AA
chr1D	343438001	343444500	6500	Ad	Ad	Ad	Ad	Ad	Ad	Ad	Ad	Ad	Ad	Ad	Ad	Ad	Ad	Ad	Ad	Ad	Ad	Ad	Ad	Ad	Ad	Ad	Ad	Ad	Ad	Ad	Ad	Ad	Ad	Ad	Ad	Ad	Ad	Ad	Ad	dd	dd	Ad	Ad	Ad	Ad	Ad	Ad	Ad	dd
chr1D	343677001	343686000	9000	dd	dd	dd	Ad	dd	Ad	Ad	Ad	Ad	Ad	dd	Ad	Ad	Ad	dd	Ad	dd	dd	dd	Ad	Ad	dd	Ad	Ad	dd	dd	dd	Ad	dd	Ad	dd	Ad	Ad	dd	Ad	dd	dd	Ad	Ad	dd	Ad	dd	Ad	Ad	dd	dd
chr1D	343677001	343696000	19000	Ad	Ad	Ad	Ad	Ad	Ad	Ad	Ad	Ad	Ad	Ad	Ad	Ad	Ad	Ad	Ad	Ad	dd	Ad	Ad	Ad	Ad	Ad	Ad	Ad	Ad	Ad	Ad	Ad	Ad	Ad	Ad	Ad	Ad	Ad	Ad	dd	Ad	Ad	Ad	Ad	Ad	Ad	Ad	Ad	dd
chr1D	344113001	344117000	4000	Ad	Ad	Ad	Ad	AA	Ad	AA	Ad	Ad	Ad	Ad	Ad	Ad	AA	AA	AA	Ad	Ad	Ad	Ad	AA	Ad	AA	AA	AA	Ad	Ad	BB	AA	AA	Ad	Ad	AA	AA	AA	dd	AA	AB	AA	Ad	AA	AA	AA	AA	Ad	AA
chr1D	344380501	344387000	6500	AA	Ad	AA	AA	dd	AA	AA	AA	AA	AA	AA	AA	AA	AA	AA	AA	AA	AA	dd	AA	AA	AA	AA	AA	AA	AA	dd	dd	AA	AA	AA	AA	AA	AA	AA	AA	AA	dd	AA	AA	AA	AA	AA	dd	AA	AA
chr1D	344900501	344907000	6500	AA	AA	AA	AA	AA	AA	AA	AA	AA	AA	AA	Ad	AA	AA	AA	AA	AA	AA	AA	AA	AA	AA	AA	AA	AA	AA	AA	AA	AA	AA	AA	AA	AA	AA	AA	dd	AA	AA	AA	Ad	AA	AA	AA	AA	AA	AA
chr1D	344927001	344932500	5500	AA	AA	AA	AA	AA	AA	AA	AA	AA	AA	AA	AA	AA	AA	AA	AA	AA	AA	AA	AA	AA	AA	AA	AA	AA	AA	Ad	AA	AA	AA	AA	AA	AA	AA	AA	Ad	dd	AA	AA	AA	AA	AA	AA	AA	AA	AA
chr1D	345025001	345033500	8500	AA	Ad	AA	AA	AA	AA	AA	AA	AA	AA	AA	AA	AA	AA	AA	AA	AA	AA	AA	AA	AA	AA	AA	AA	AA	AA	AA	AA	AA	AA	AA	AA	AA	AA	AA	Ad	AA	AA	Ad	AA	AA	AA	AA	AA	AA	Ad
chr1D	345068001	345074000	6000	AA	AA	AA	AA	AA	AA	AA	AA	AA	Ad	AA	AA	AA	AA	AA	AA	AA	AA	AA	AA	AA	AA	AA	AA	AA	AA	AA	AA	AA	AA	AA	AA	AA	AA	AA	AA	AA	BB	AA	AA	AA	AA	AB	AA	AA	AB
chr1D	345355501	345362500	7000	AA	AA	AA	AA	AA	AA	AA	AA	AA	AA	AA	AB	AA	AA	AA	AA	AA	AA	AA	AA	AA	AA	AA	AA	AA	AA	AA	AA	AA	AA	AA	AA	AA	AA	AA	AA	AA	AA	AA	AA	AA	AA	AA	AA	AA	AA
chr1D	345842001	345852000	10000	Ad	Ad	AA	Ad	Ad	Ad	Ad	Ad	Ad	Ad	Ad	AA	Ad	Ad	Ad	Ad	Ad	Ad	Ad	Ad	Ad	Ad	Ad	AA	Ad	Ad	Ad	Ad	Ad	Ad	Ad	Ad	Ad	Ad	Ad	Ad	dd	Ad	Ad	Ad	Ad	Ad	Ad	Ad	Ad	dd
chr1D	346582001	346587000	5000	AA	AA	AA	AA	AA	AA	AA	AA	AA	AA	AA	AB	Ad	AA	AA	AA	AA	AA	AA	AB	AA	AB	AA	AA	AA	AA	AA	AA	AA	AA	AA	AB	AA	AA	AA	AB	AA	AA	AA	AA	AA	AA	AA	AA	AA	AA
chr1D	346669001	346686000	17000	AA	AA	AA	AA	AA	AA	AA	AA	AA	Ad	Ad	Ad	Ad	AA	AA	AA	AA	AA	AA	AA	AA	AA	AA	AA	Ad	Ad	Ad	AB	AA	AA	AA	Ad	AA	AA	AA	Ad	AA	AA	AA	Ad	AA	AA	AA	AA	AA	AA
chr1D	346697001	346709000	12000	AA	AA	AA	AA	AA	AA	AA	AA	AA	AA	AA	AA	AA	AA	AA	AA	AA	AA	AA	AA	AA	AA	AA	AA	AA	AA	AA	AA	AA	AA	AA	AA	AA	AA	AA	AB	dd	AA	AA	AA	AA	AA	AA	AA	AA	AA
chr1D	346723501	346728000	4500	AA	AA	AA	AA	AA	AB	AA	AB	AA	AA	AA	AA	AA	AA	AA	AA	AB	AA	AA	AA	AB	AA	AA	AA	AA	AA	AA	AA	AA	AB	AA	AA	AA	AA	AA	AB	dd	AA	AA	AB	AA	AA	AA	AA	AA	AA
chr1D	346797501	346804500	7000	Ad	AA	AA	Ad	Ad	Ad	Ad	Ad	Ad	Ad	AA	AA	Ad	Ad	Ad	Ad	Ad	Ad	Ad	Ad	AA	Ad	AA	AA	Ad	AA	AA	AA	AA	AA	Ad	Ad	Ad	Ad	Ad	Ad	dd	Ad	Ad	Ad	AA	Ad	Ad	Ad	Ad	Ad
chr1D	346896501	346904500	8000	Ad	Ad	Ad	Ad	Ad	Ad	Ad	Ad	Ad	Ad	Ad	Ad	Ad	Ad	Ad	Ad	Ad	Ad	Ad	Ad	Ad	Ad	Ad	Ad	Ad	Ad	Ad	Ad	Ad	Ad	Ad	Ad	Ad	Ad	Ad	dd	dd	dd	dd	Ad	Ad	Ad	Ad	Ad	dd	dd
chr1D	347067001	347071000	4000	AA	Ad	AA	AA	Ad	Ad	Ad	Ad	AA	Ad	AA	AA	AA	AA	AA	AA	AA	Ad	AA	AA	Ad	AA	Ad	Ad	AA	Ad	AA	AA	Ad	AA	Ad	AA	Ad	Ad	AA	Ad	dd	Ad	Ad	Ad	AA	Ad	Ad	Ad	Ad	Ad
chr1D	347256501	347263000	6500	AA	AA	AA	AA	AA	AA	AA	AA	AA	AA	AA	AA	AA	AA	AA	AA	AA	AA	AA	AA	AA	AA	AA	AA	AA	AA	AA	AA	AA	AA	AA	AA	AA	AA	AA	Ad	AA	Ad	AA	Ad	AA	AA	AA	AA	Ad	Ad
chr1D	347796501	347804500	8000	Ad	AA	AA	Ad	Ad	Ad	Ad	AA	Ad	AA	Ad	AA	AA	AA	Ad	Ad	Ad	Ad	Ad	AA	Ad	Ad	Ad	Ad	Ad	Ad	AA	Ad	Ad	AA	Ad	AA	Ad	Ad	AA	Ad	Ad	Ad	Ad	Ad	AA	Ad	Ad	Ad	Ad	Ad
chr1D	347896001	347919500	23500	AA	AA	AA	AA	AA	AA	AA	AA	AA	AA	AA	AA	AA	AA	AA	AA	AA	AA	AA	AA	AA	AA	AA	AA	AA	AA	AA	AA	AA	AA	AA	AA	AA	AA	AA	AA	dd	AA	AA	AA	AA	AA	AA	AA	AA	AA
chr1D	347970001	347974500	4500	AA	Ad	Ad	Ad	AA	Ad	AA	AA	AA	AA	AA	Ad	AA	AA	AA	AA	Ad	Ad	AA	AA	AA	AA	AA	Ad	AA	AA	Ad	AA	AA	Ad	AA	AA	AA	Ad	AA	AA	dd	Ad	Ad	Ad	AA	Ad	Ad	Ad	Ad	Ad
chr1D	348095501	348099500	4000	AA	AA	AA	AB	AA	AA	AA	AA	AA	AA	AA	AA	AA	AA	AA	AA	AA	AA	AA	AA	AA	AB	AA	AA	AA	AA	AA	AA	AA	AB	AA	AA	AA	AA	AA	AB	AA	AA	AA	AB	AA	AA	AA	AA	AA	AA
chr1D	348397001	348401500	4500	AA	AA	AA	AA	AA	AA	AA	AA	AA	AA	AA	AA	AA	AA	AA	AA	AA	AA	AA	AA	AA	AA	Ad	AA	AA	AA	AA	AA	AA	AA	AA	Ad	AA	AA	AA	AA	AA	AB	AA	AA	AA	AA	AA	AA	AA	Ad
chr1D	348539501	348544500	5000	Ad	AA	AA	AA	AA	AA	AA	AA	AA	AA	AA	AA	AA	AA	AA	AA	AA	AA	AA	AA	AA	AA	AA	AA	AA	AA	AA	AA	AA	AA	AA	AA	AA	AA	AA	Ad	dd	Ad	Ad	AA	AA	Ad	Ad	Ad	Ad	Ad
chr1D	348554001	348561000	7000	AA	Ad	AA	AA	Ad	AA	AA	AA	dd	AA	AA	Ad	dd	dd	dd	dd	dd	AA	AA	Ad	AA	AA	AA	AA	AA	AA	AA	AA	AA	dd	Ad	dd	AA	dd	dd	AA	AA	Ad	AA	AA	AA	dd	dd	AA	Ad	dd
chr1D	349308501	349312500	4000	AA	AA	AA	AA	Ad	AA	AA	AA	AA	AA	AA	AA	AA	AA	AA	AA	AA	AA	AA	AA	AA	AA	AA	AA	AA	AA	AA	AA	AA	AA	AA	AA	AA	AA	AA	AA	dd	AA	AA	AA	AA	AA	Ad	AA	AA	AA
chr1D	349414001	349419000	5000	AA	Ad	AA	AA	AA	AA	AA	AA	AA	AA	AA	AA	AA	AA	AA	AA	AA	AA	AA	AB	AA	AA	AA	AA	AA	AA	AA	AA	AB	AA	AB	AA	Ad	Ad	AA	AB	AA	AA	AA	AA	AA	AA	AA	AA	AA	AB
chr1D	349944001	349990500	46500	AA	AA	AA	AA	AA	AA	AA	AA	AA	AA	AA	AA	AA	AA	AA	AA	AA	AA	AA	AA	AA	AA	AA	AA	AA	AA	AA	AA	AA	AA	AA	AA	AA	AA	AA	AA	AA	AA	AA	AA	AA	AA	AA	AA	AA	AA
chr1D	349975001	350001500	26500	AA	AA	AA	AA	AA	AA	AA	AA	AA	AA	AA	AA	AA	AA	AA	AA	AA	AA	AA	AA	AA	AA	AA	AA	AA	AA	AA	AB	AA	AA	AA	AA	AA	AA	AA	Ad	dd	AA	AA	Ad	AA	AA	AA	AA	AA	AA
chr1D	350097001	350103000	6000	AA	AA	AA	AA	AA	AA	AA	AA	AA	AA	AA	AA	AA	AA	AA	AA	AA	AA	AA	AA	AA	AA	AA	AA	AA	AA	AA	AA	AA	AA	AA	AA	AA	AA	AA	AA	AA	AA	AA	AA	AA	AA	AA	AA	AA	Ad
chr1D	350375001	350379000	4000	AA	Ad	AA	AA	AA	AA	AA	AA	AA	AA	AA	AA	AA	AA	AA	AA	AA	AA	AA	AA	AA	AA	AA	AA	AA	AA	AA	AB	AA	AA	AA	AA	AA	AA	AA	dd	AA	AA	AA	Ad	AA	AA	AA	AA	AA	AA
chr1D	350628001	350633000	5000	dd	Ad	Ad	Ad	Ad	Ad	Ad	Ad	Ad	Ad	Ad	AA	Ad	Ad	Ad	Ad	Ad	Ad	Ad	Ad	Ad	Ad	Ad	Ad	Ad	Ad	Ad	Ad	Ad	Ad	Ad	Ad	dd	Ad	Ad	dd	Ad	dd	Ad	Ad	Ad	dd	Ad	Ad	Ad	dd
chr1D	351302001	351315000	13000	AA	AA	AA	AA	AA	AA	AA	AA	AA	AA	AA	AA	AA	AA	AA	AA	AA	AA	AA	AA	AA	AA	AA	AA	AA	AA	AA	AA	AA	AA	AA	AA	AA	AA	AA	AA	AA	AA	AA	AA	AA	AA	AA	AA	AA	AA
chr1D	351445501	351452500	7000	AA	AA	AA	AA	AA	AA	AA	AA	AA	AA	AA	AA	AA	AA	AA	AA	AA	AA	AA	AA	AA	AA	AA	AA	AA	AA	AA	AA	AA	AA	AA	AA	AA	AA	AA	Ad	AA	AA	AA	AA	AA	AA	AA	AA	Ad	AA
chr1D	351676501	351683500	7000	AA	AA	AA	AA	AA	Ad	AA	AA	AA	AA	Ad	AA	AA	AA	AA	AA	AA	AA	AA	AA	AA	AA	AA	AA	AA	AA	AA	AA	AA	AA	AA	AA	AA	AA	AA	AA	AA	Ad	AA	AA	AA	Ad	AA	Ad	Ad	Ad
chr1D	352005501	352015000	9500	Ad	AA	AA	Ad	AA	AA	Ad	Ad	AA	AA	Ad	Ad	AA	AA	Ad	Ad	AA	AA	AA	Ad	AA	AA	AA	Ad	AA	AA	AA	Ad	AA	AA	AA	AA	AA	AA	AA	Ad	AA	Ad	Ad	Ad	AA	AA	Ad	Ad	Ad	Ad
chr1D	352010501	352015000	4500	Ad	AA	Ad	AA	AA	AA	AA	AA	AA	AA	Ad	AA	AA	AA	AA	AA	AA	AB	Ad	Ad	AA	AA	AA	AA	AA	AA	AA	Ad	AA	AA	AA	AA	AA	AA	AA	AA	AA	Ad	Ad	AA	AA	AA	Ad	AA	AA	AA
chr1D	352172501	352178000	5500	AA	AA	AA	AB	AA	AA	AA	AA	AA	AA	AA	AA	AA	AA	AA	AA	AA	AA	AA	AA	AA	AA	AA	AA	AA	AA	AA	Ad	AA	AA	AA	AA	AA	AA	AA	AB	AA	AA	AA	AA	AA	AA	AA	AA	AA	AA
chr1D	352314001	352327000	13000	AA	AA	AA	AA	AA	AA	AA	AA	AA	AA	AA	AA	AA	AA	AA	AA	AA	AA	AA	AA	AA	AA	AA	AA	AA	AA	AA	AA	AA	AA	AA	AA	AA	AA	AA	AB	AA	AA	AA	AB	AA	AA	Ad	AA	AA	AA
chr1D	352335001	352358500	23500	AA	AA	AA	AA	AA	AA	AA	AA	AA	AA	AA	AA	AA	AA	AA	AA	AA	AA	AA	AA	AA	AA	AA	AA	AA	AA	AA	AA	AA	AA	AA	AA	AA	AA	AA	AA	AA	AA	AA	AA	AA	AA	AA	AA	AA	AA
chr1D	352366501	352376000	9500	AA	AA	AA	AA	AA	AA	AA	AA	AA	AA	AA	AA	AA	AA	AA	AA	AA	AA	AA	AA	AA	AA	AA	AA	AA	AA	AA	AB	AA	AA	AA	AA	AA	AA	AA	Ad	AA	AB	AA	Ad	AA	AA	AA	AA	AA	AA
chr1D	352712501	352725000	12500	AA	AA	AA	AA	AA	AA	AA	dd	AA	AA	AA	AA	AA	AA	AA	AA	AA	AA	AA	AA	AA	AA	AA	AA	AA	AA	AA	AA	AA	AA	AA	AA	AA	AA	AA	AA	AA	AA	AA	AA	AA	AA	AA	AA	AA	AA
chr1D	353401001	353406000	5000	Ad	Ad	Ad	Ad	Ad	Ad	Ad	Ad	Ad	Ad	Ad	Ad	Ad	Ad	Ad	Ad	dd	Ad	Ad	Ad	Ad	Ad	Ad	Ad	Ad	Ad	dd	dd	Ad	Ad	Ad	Ad	Ad	Ad	Ad	dd	dd	Ad	Ad	dd	Ad	Ad	Ad	Ad	Ad	Ad
chr1D	353410001	353414000	4000	dd	dd	dd	dd	dd	dd	dd	dd	dd	dd	dd	dd	dd	dd	dd	dd	dd	dd	dd	dd	dd	dd	dd	dd	dd	dd	dd	dd	dd	dd	dd	dd	dd	dd	dd	dd	dd	dd	dd	dd	dd	dd	dd	dd	dd	dd
chr1D	353569001	353584000	15000	AA	AA	AA	AA	AA	AA	AA	AA	AA	AA	AA	AA	AA	AA	AA	AA	AA	AA	AA	AA	AA	AA	AA	AA	AA	AA	AA	AA	AA	AB	AA	AA	AA	AA	AA	AB	AA	AA	AA	AA	AA	AA	AA	AA	AA	AA
chr1D	353953501	353960500	7000	AA	AA	AA	AA	AA	AA	AA	AA	AA	AA	AA	AA	AA	AA	AA	AA	AA	AB	AA	AA	AA	AA	AA	AA	AA	AA	AA	Ad	AA	AA	AA	AA	AA	AA	AA	AB	dd	AA	AA	AA	AA	AA	AA	AA	AA	AA
chr1D	354787501	354793000	5500	dd	dd	dd	dd	dd	dd	dd	dd	dd	dd	dd	dd	dd	dd	dd	dd	dd	dd	dd	dd	dd	dd	dd	dd	dd	dd	dd	dd	dd	dd	dd	dd	dd	dd	dd	dd	Ad	dd	dd	dd	dd	dd	dd	dd	dd	dd
chr1D	354807501	354811500	4000	AA	AA	AA	Ad	AA	Ad	AA	AA	AA	AA	AA	Ad	AA	Ad	Ad	AA	Ad	AA	AA	AA	AA	AA	AA	AA	AA	AA	AA	Ad	AA	AA	AA	AA	AA	AA	AA	AA	dd	AA	Ad	Ad	Ad	AA	AA	AA	AA	AA
chr1D	355309001	355315500	6500	AA	AA	Ad	AA	Ad	AA	AA	AA	Ad	Ad	AA	Ad	AA	AA	AA	Ad	Ad	AA	AA	AA	AA	AA	AA	Ad	Ad	AA	AA	Ad	Ad	AA	AA	AA	AA	AA	AA	Ad	AA	Ad	Ad	Ad	Ad	Ad	Ad	Ad	Ad	Ad
chr1D	355369001	355374000	5000	AA	Ad	AA	AA	AA	AA	AA	AA	AA	AA	AA	AA	AA	AA	AA	AA	AA	AA	AA	AA	AA	AA	AA	AA	AA	AA	AA	AB	AA	AA	AA	AA	AA	AA	AA	dd	AA	AA	Ad	Ad	AA	AA	AA	AA	AA	AA
chr1D	355897001	355904000	7000	AA	AA	AA	AA	AA	AA	AA	AA	AA	AA	AA	AA	AA	AA	Ad	AA	AA	AA	AA	AA	AA	AA	AA	AA	AA	AA	AA	AA	AA	AA	Ad	AA	AA	AA	AA	Ad	AA	Ad	Ad	Ad	AA	Ad	AA	Ad	Ad	AA
chr1D	355941001	355945500	4500	AB	AB	BB	AB	AB	AB	AB	AB	AB	AB	AB	BB	AB	BB	AB	BB	BB	AB	AB	AB	AB	AB	BB	AA	BB	AB	AB	BB	AB	AB	BB	AB	AB	AB	AB	AA	AB	BB	BB	AA	AB	AB	AB	AB	AB	AB
chr1D	355980001	355984500	4500	AA	AA	AB	AA	AA	AA	AA	AA	AA	AB	AA	AA	AA	AA	AA	AB	Ad	AA	AA	AA	AA	AA	AA	AB	AA	AA	AA	AA	AB	AB	AA	AA	AA	AA	AA	AA	AA	AA	AA	AA	AA	AA	AB	AA	AA	AA
chr1D	356020501	356026000	5500	AB	AA	AA	AA	AA	AA	AB	AA	AA	AA	AA	AA	AA	AA	AA	AA	AA	AA	AA	AA	AA	AA	AA	dd	AA	AA	AA	AA	AA	AA	AB	AA	AA	AA	AA	AA	AA	AA	AA	AA	AA	AA	AA	AA	AA	AA
chr1D	356465501	356470000	4500	AA	AA	AA	AA	AA	Ad	AA	AA	AB	AA	AB	AB	AA	AA	AA	AA	AA	AA	AB	AA	AA	AA	AA	AA	AA	AA	AA	AA	AA	AA	AB	AA	dd	AA	AA	dd	AA	AA	dd	AA	AA	AA	AA	AA	AA	AA
chr1D	356889001	356894000	5000	AA	AA	AA	AA	AA	AA	AA	AA	AA	AA	AA	AA	AA	AA	AA	AB	AA	AA	AA	AA	AA	AA	AA	AA	AA	AA	AA	AA	AA	AA	AA	AA	AA	AA	AA	AA	AA	Ad	Ad	Ad	AA	AA	Ad	Ad	AA	Ad
chr1D	357217001	357221500	4500	BB	BB	BC	BB	AB	BB	BB	AB	AB	AB	AB	BB	BB	BB	BB	BB	BB	AB	BB	BC	BB	M	BC	BB	BB	BB	BB	BB	BB	BB	BB	BB	BB	AA	BB	AA	dd	BC	AB	AA	BB	AA	BB	AB	BB	AB
chr1D	357268001	357273500	5500	AA	AA	AA	AB	AA	AA	AB	AA	AA	AA	AA	AA	AA	AA	AA	AA	AA	AA	AA	AA	AA	AA	AA	AB	AA	AA	AA	AA	AA	AA	AA	AA	AA	AA	AA	AA	AA	AA	AA	AA	AA	AA	AA	AA	AA	AA
chr1D	357594001	357598500	4500	AA	AA	Ad	AA	AA	AB	AA	AA	AA	AB	AA	AA	AA	AB	AA	AA	AA	AA	AA	AA	AA	AA	AB	AA	AA	AA	AA	AB	AB	AA	AB	AA	AA	AB	AA	Ad	AA	AB	AA	AA	AA	AA	AA	AA	AA	AA
chr1D	357739001	357746500	7500	AA	Ad	AA	AA	AA	AA	Ad	AA	AA	Ad	Ad	Ad	Ad	Ad	AA	Ad	AA	AA	Ad	AA	Ad	AA	Ad	Ad	Ad	AA	AA	AA	AA	AA	AA	AA	AA	AA	Ad	Ad	Ad	Ad	Ad	Ad	Ad	Ad	Ad	Ad	Ad	Ad
chr1D	357790001	357798500	8500	AA	Ad	AA	Ad	AA	AA	AA	AA	AA	AA	AA	AA	AA	AA	Ad	AA	AA	AA	AA	AA	AA	AA	AA	Ad	AA	Ad	AA	AA	AA	AA	AA	AA	Ad	AA	Ad	Ad	Ad	Ad	Ad	Ad	AA	Ad	Ad	Ad	Ad	Ad
chr1D	358137001	358141500	4500	AA	AA	AA	AA	AA	Ad	Ad	AA	Ad	Ad	AA	AA	AA	Ad	AA	AA	AA	AA	AA	Ad	Ad	Ad	AA	AA	Ad	AA	AA	Ad	AA	Ad	AA	AA	Ad	AA	AA	AA	AA	Ad	Ad	Ad	AA	Ad	Ad	Ad	Ad	Ad
chr1D	358269501	358287000	17500	AA	AA	AA	AA	AA	AA	AA	AA	AA	AA	AA	AA	AA	AA	AA	AA	AA	AA	AA	AA	AA	AA	AA	AA	AA	AA	AA	AA	AA	AA	AA	AA	AA	AA	AA	AA	dd	AA	AA	AA	AA	AA	AA	AA	AA	AA
chr1D	358841501	358846500	5000	Ad	AA	AA	AA	AA	AA	AA	AA	AA	AA	AA	AA	AA	AA	AA	AA	Ad	AA	AA	AA	AA	AA	AA	AA	AA	AA	AA	AB	AA	AA	AA	AA	AA	AA	AA	Ad	AA	AA	AA	Ad	AA	AA	AA	AA	AA	AA
chr1D	358871001	358875000	4000	Ad	Ad	Ad	Ad	Ad	Ad	Ad	Ad	Ad	Ad	Ad	Ad	AA	Ad	Ad	Ad	Ad	Ad	Ad	Ad	Ad	Ad	Ad	Ad	Ad	Ad	AA	AA	Ad	Ad	AA	Ad	Ad	Ad	Ad	dd	AA	Ad	Ad	Ad	AA	Ad	Ad	Ad	Ad	Ad
chr1D	358878501	358884000	5500	Ad	Ad	Ad	Ad	Ad	Ad	Ad	Ad	Ad	Ad	Ad	Ad	Ad	Ad	Ad	Ad	Ad	Ad	Ad	Ad	Ad	Ad	Ad	AA	Ad	Ad	AA	AA	Ad	Ad	Ad	Ad	Ad	Ad	AA	Ad	Ad	Ad	Ad	Ad	Ad	Ad	Ad	Ad	Ad	Ad
chr1D	359018501	359024000	5500	AA	AA	AA	AA	AA	Ad	Ad	Ad	AA	AA	AA	AA	AA	AA	AA	AA	AA	Ad	AA	Ad	AA	AA	Ad	AA	AA	Ad	Ad	AA	Ad	AA	AA	Ad	Ad	Ad	AA	AA	BB	AA	AA	AA	AA	AA	AA	AA	AA	AB
chr1D	359018501	359035000	16500	AA	AA	AA	AA	AA	AA	AA	AA	AA	AA	AA	AA	AA	AA	AA	AA	AA	AA	AA	AA	AA	AA	AA	AA	AA	AA	AA	AA	AA	AA	AA	AA	AA	AA	AA	AA	BB	AA	AA	AA	AA	AA	AA	AA	AA	AA
chr1D	359132501	359141000	8500	Ad	Ad	AA	AA	Ad	AA	AA	Ad	AA	Ad	AA	AA	Ad	Ad	AA	AA	AA	Ad	AA	AA	AA	Ad	AA	AA	AA	AA	AA	AA	Ad	AA	AA	AA	Ad	AA	AA	AA	BB	AA	AA	AA	AA	AA	AA	Ad	AA	AB
chr1D	359156501	359170000	13500	AA	AA	AB	AA	AA	AA	AA	AB	AA	AA	AA	AA	AA	AA	AA	AA	AA	AA	AA	AA	AA	AA	AA	AA	AA	AA	AA	AA	AA	AA	AA	AA	AA	AA	AA	AB	AB	AA	AA	AB	AA	AA	AB	AA	AB	BC
chr1D	359156501	359186000	29500	BB	AB	BC	BB	BB	AB	BB	AB	BB	BB	BC	M	BB	AB	BB	BB	AB	AB	BB	BB	BB	AB	BB	BC	BB	BB	BB	BB	AB	AB	AB	BB	AB	BB	BB	BC	BC	AB	BB	BC	AB	BB	BC	AB	BC	M
chr1D	359242501	359248000	5500	AA	AA	AA	AA	AA	AA	AA	Ad	AA	AA	AA	AA	AA	Ad	AA	AA	AA	AA	AA	AA	AA	AA	AA	AA	AA	AA	AA	AA	Ad	AA	Ad	AA	AA	AA	AA	AB	BB	AA	AA	AB	AA	AA	AA	Ad	AB	AB
chr1D	359272001	359280000	8000	AA	AA	AB	AA	AA	AA	AA	AB	AB	AA	AB	BB	AB	AA	AB	AB	AA	AB	AB	AB	AA	AA	AB	AA	AB	AA	AA	AB	AB	AA	AA	AB	AA	AA	AB	BC	dd	AA	AB	BC	AB	AB	AB	AA	BB	AB
chr1D	359288001	359299000	11000	AA	AA	AA	AA	Ad	AA	AA	AA	AA	AA	AB	AA	AA	AA	AA	AA	Ad	AA	AB	AA	AA	AA	AA	AA	AA	AA	AA	AA	AA	AA	AA	AA	AA	AA	AA	AA	dd	AA	AA	AA	AA	AA	AA	AA	AA	AA
chr1D	359419001	359424000	5000	AA	AA	AA	Ad	Ad	Ad	Ad	Ad	Ad	AA	AA	AA	AA	AA	Ad	AA	AA	AA	AA	Ad	AA	Ad	AA	AA	AA	AA	Ad	AA	Ad	AA	Ad	AA	Ad	Ad	AA	AB	BB	Ad	AA	AB	AA	AA	AA	Ad	AA	AB
chr1D	359537001	359543000	6000	Ad	Ad	Ad	Ad	Ad	Ad	Ad	Ad	Ad	Ad	Ad	Ad	Ad	Ad	Ad	Ad	AA	Ad	Ad	AA	Ad	Ad	Ad	Ad	AA	Ad	Ad	AB	Ad	Ad	Ad	Ad	AA	AA	Ad	dd	AA	AA	AA	Ad	AA	Ad	Ad	AA	Ad	AA
chr1D	359585001	359589000	4000	AA	AA	Ad	dd	Ad	Ad	AA	AA	AA	AA	AA	Ad	AA	Ad	Ad	Ad	AA	Ad	Ad	AA	Ad	dd	dd	dd	AA	AA	Ad	AA	AA	Ad	AA	AA	AA	Ad	AA	Ad	Ad	dd	Ad	Ad	Ad	Ad	Ad	Ad	dd	Ad
chr1D	359588001	359592000	4000	Ad	Ad	AA	Ad	AA	AA	Ad	Ad	AA	AA	AA	Ad	AA	dd	AA	Ad	Ad	Ad	Ad	Ad	AA	Ad	Ad	Ad	AA	AA	Ad	Ad	AA	AA	Ad	AA	AA	Ad	AA	Ad	AA	Ad	Ad	Ad	Ad	Ad	Ad	Ad	Ad	Ad
chr1D	359644001	359648500	4500	AA	AA	AA	AB	AB	AA	AA	AA	AA	AA	AA	AA	AA	AB	AA	AA	AA	AA	AA	AA	AA	AA	AA	AA	AA	AA	AB	AA	AA	AA	AA	AA	AA	AA	AB	AB	AA	AA	AA	AA	AA	AA	AA	AA	AA	AB
chr1D	360331001	360337000	6000	AA	AA	AA	AA	AA	AA	AA	AA	AA	AA	AA	AA	AA	AA	AA	AA	AA	dd	AA	AA	AA	AA	AA	AA	AA	Ad	AA	AA	AA	AA	AA	AA	AA	AA	AA	AA	AA	AA	AA	dd	AA	AA	AA	AA	AA	AA
chr1D	360616501	360621000	4500	AB	AB	AA	AB	AA	AA	AA	AB	AB	AA	AA	AB	AB	AB	AA	AA	AB	AB	AB	AB	AA	AA	AB	AB	AA	AB	AA	AB	AA	AA	AA	AB	Ad	AA	AA	Ad	AB	AB	Ad	AA	AB	AB	AA	AA	AA	AB
chr1D	360927001	360931500	4500	AA	Ad	Ad	AA	Ad	AA	Ad	Ad	Ad	AA	Ad	Ad	Ad	AA	Ad	Ad	Ad	AA	Ad	Ad	AA	Ad	AA	Ad	Ad	Ad	Ad	AB	AA	Ad	AA	Ad	Ad	AA	Ad	dd	AA	AA	Ad	Ad	AA	AA	Ad	Ad	Ad	Ad
chr1D	361063501	361073000	9500	AA	AA	AA	AA	AA	AA	AA	AA	AA	AA	AA	Ad	AA	AA	AA	AA	AA	AA	AA	AA	AA	AA	AA	AA	AA	AA	AA	AA	AA	AA	AA	AA	AA	AA	AA	Ad	AA	Ad	Ad	Ad	AA	Ad	AA	AA	Ad	Ad
chr1D	361184501	361189000	4500	Ad	Ad	Ad	Ad	Ad	Ad	Ad	Ad	Ad	Ad	Ad	Ad	Ad	Ad	Ad	Ad	Ad	Ad	Ad	Ad	Ad	Ad	Ad	Ad	Ad	Ad	Ad	Ad	Ad	Ad	Ad	Ad	Ad	Ad	Ad	Ad	dd	Ad	Ad	Ad	Ad	Ad	Ad	Ad	Ad	Ad
chr1D	361636001	361694500	58500	AA	AA	AA	AA	AA	AA	AA	AA	AA	AA	AA	AA	AA	AA	AA	AA	AA	AA	AA	AA	AA	AA	AA	AA	AA	AA	AA	AA	AA	AA	AA	AA	AA	AA	AA	AA	AA	AA	AA	AA	AA	AA	AA	AA	AA	AA
chr1D	361809001	361815000	6000	AA	AA	AA	AA	AA	AA	AB	AA	AA	AA	AA	AA	AA	AA	AA	AA	AA	AA	AA	AA	AA	AA	AA	AA	AA	AA	AA	AA	AA	AB	AA	AA	AA	AA	AA	AB	dd	AA	AA	AA	AA	AA	AA	AA	AA	AA
chr1D	361990501	361994500	4000	Ad	AA	Ad	AA	AA	Ad	AA	AB	AA	AA	Ad	AA	Ad	AA	AA	AB	AA	AA	AA	AA	Ad	AA	Ad	AA	Ad	AA	AA	AA	AA	AA	AA	AA	AA	AA	AA	Ad	Ad	AA	AA	AA	AA	AA	Ad	AA	Ad	Ad
chr1D	362148001	362157500	9500	AA	AA	AA	AA	AA	AA	AA	AA	AA	AA	AA	AA	AA	AA	AA	AA	AA	AA	AA	AA	AA	AA	AA	AA	AA	AA	AA	AA	AA	AA	AA	AA	AA	AA	AA	AA	AA	AA	AA	AA	AA	AA	AA	AA	AA	Ad
chr1D	362165001	362171000	6000	AA	AA	AA	AA	AA	AA	AA	AA	AA	AA	AA	AA	AA	AA	AA	AA	AA	AA	AA	AA	dd	AA	AA	AA	AA	AA	AA	AB	AA	AA	AA	AA	AA	AA	AA	dd	AA	AA	AA	Ad	AA	AA	AA	AA	AA	AA
chr1D	362705001	362709500	4500	AA	AA	AA	AA	AA	AA	AA	AA	AA	AA	Ad	AA	AA	AA	AA	AA	Ad	AA	AA	AA	Ad	AA	AA	Ad	AA	AA	AA	AB	AA	AA	AA	AA	AA	AA	AA	Ad	dd	AA	Ad	Ad	AA	Ad	Ad	Ad	AA	Ad
chr1D	362806001	362811500	5500	AA	AA	AA	AA	AA	AA	AA	AA	AA	AA	AA	AA	AA	AA	AA	AA	AA	AA	AA	AA	AA	AA	AA	AA	AA	AA	AA	AA	AA	AA	AA	AA	AA	AA	AA	AB	AA	AA	AA	AA	AA	AA	AA	AA	AA	AA
chr1D	362877501	362881500	4000	AA	AB	AA	AA	AA	AA	AA	AA	AA	AB	AA	AA	AA	AA	AB	AA	AA	AA	AA	AB	AA	AA	AA	AA	AA	AA	AA	AB	AA	AA	AA	AA	AA	AA	AA	AA	AA	AA	AA	AA	AA	AA	AB	AA	AB	AA
chr1D	362886501	362891500	5000	AA	AA	AA	AB	AA	AA	AA	AA	AA	AA	AA	AA	AA	AB	AA	AA	AA	AA	AA	AB	AA	AA	AA	AA	AA	AA	AB	AA	AA	AA	AA	AB	AA	AA	AB	AA	AA	AA	AA	AA	AA	AA	AA	AA	AA	AA
chr1D	363538501	363542500	4000	AB	AA	AB	AA	AB	AB	AA	AA	AB	AA	AA	AB	AB	AB	AA	AA	AB	AA	AB	AA	AA	AA	AA	AB	AB	AA	AA	AA	AA	AA	AB	AA	AA	AA	AA	AB	AA	AA	AA	AA	AA	AA	AA	AA	AA	AA
chr1D	365068501	365076500	8000	AA	AA	AA	AA	AA	Ad	AA	AA	AA	AA	AA	AA	AA	AA	AA	AA	AA	AA	AA	AA	AA	AA	AA	AA	AA	Ad	AA	AA	AA	AA	AA	AA	AA	AA	AA	Ad	AA	Ad	Ad	Ad	AA	Ad	Ad	Ad	Ad	Ad
chr1D	365377501	365383000	5500	AA	AA	AA	AA	AA	AA	dd	AA	AA	AA	AA	AA	AA	AA	AA	AA	AA	AA	AA	AA	AA	AA	AA	AA	AA	AA	AA	AA	AA	AA	AA	AA	AA	AA	AA	AA	AA	AA	AA	AB	AA	AA	AA	AA	AA	AA
chr1D	365835501	365839500	4000	AB	AA	AA	AA	AA	AA	AA	AA	AA	AA	AA	AA	AA	AA	AA	AA	AA	AA	AA	AA	AA	AA	AA	AA	AA	AA	AA	AB	AA	AA	AA	AA	AA	AA	AA	dd	AA	AA	AA	Ad	AA	Ad	AA	AA	AA	AA
chr1D	365880501	365886500	6000	AA	Ad	AA	AA	AA	AA	AA	AA	AA	BB	AA	AA	AA	AA	AA	AA	AA	AA	Ad	BB	AA	AA	AA	AA	AA	AA	AA	AA	AB	AA	AA	AA	AA	AA	AA	AA	dd	Ad	Ad	AA	AA	AA	Ad	AA	AA	Ad
chr1D	365909001	365996500	87500	AA	AA	AA	AA	AA	AA	AA	AA	AA	AA	AA	AA	AA	AA	AA	AA	AA	AA	AA	AA	AA	AA	AA	AA	AA	AA	AA	AA	AA	AA	AA	AA	AA	AA	AA	AA	dd	AA	AA	AA	AA	AA	AA	AA	AA	AA
chr1D	366032501	366037500	5000	AA	AA	AA	Ad	AA	AA	AA	Ad	AA	AA	AA	AA	AA	AA	AA	AA	AA	AA	AA	AA	AA	AA	AA	AA	AA	AA	AA	AA	AA	Ad	AA	AA	AA	AA	AA	AA	AA	AA	Ad	AA	AA	AA	AA	Ad	Ad	AA
chr1D	366169001	366173000	4000	dd	dd	dd	dd	dd	dd	dd	dd	dd	dd	dd	dd	dd	dd	dd	dd	dd	dd	dd	dd	dd	dd	dd	dd	dd	dd	dd	dd	dd	dd	dd	dd	dd	dd	dd	dd	dd	dd	dd	dd	dd	dd	dd	dd	dd	dd
chr1D	366387501	366392000	4500	AA	Ad	AA	Ad	AA	AA	Ad	Ad	Ad	dd	dd	Ad	Ad	AA	AA	Ad	Ad	AA	AA	dd	AA	AA	Ad	AA	Ad	Ad	AA	AB	dd	AA	Ad	AA	AA	AA	Ad	Ad	AA	AA	AA	Ad	AA	Ad	AA	Ad	AA	Ad
chr1D	367326001	367332000	6000	AA	AA	AA	AA	AA	AA	AA	AB	AA	AA	AA	AA	AA	AA	AB	AA	AB	AA	AB	AA	AB	AA	AA	AA	AA	AB	AA	AB	AA	AA	AB	AA	AA	AA	AA	AA	dd	AA	AA	AB	AA	AA	Ad	AA	AA	AA
chr1D	367459001	367466000	7000	AA	AA	AA	Ad	AA	AA	AA	AA	AA	AA	AA	AA	AA	AA	AA	AA	AA	AA	AA	AA	AA	AA	AA	AA	AA	AA	AA	AA	AA	AA	AA	AA	AA	AA	AA	AA	dd	Ad	AA	AA	AA	AA	AA	AA	AA	Ad
chr1D	367475001	367479000	4000	AA	AA	AA	AB	AA	AA	AB	AA	AA	AB	AB	AA	AA	AA	AB	AA	Ad	AB	Ad	AA	AA	AA	AA	AA	AB	AB	AA	AB	AA	AB	AB	AB	AB	AA	AA	AA	dd	AA	AA	AA	AA	AA	AA	AA	AA	AA
chr1D	367495001	367500500	5500	AA	AA	AA	AB	AB	AA	AB	AB	AB	AA	AA	AA	AA	AB	AB	AA	AB	AA	AA	AA	AA	AB	AB	AA	AA	AA	AA	AA	AA	AA	AA	AA	AA	AA	AA	AA	dd	AA	AA	AA	AA	AA	AA	AA	AA	AA
chr1D	367559001	367564500	5500	Ad	AA	Ad	Ad	AA	AA	AA	AA	AA	Ad	AA	Ad	Ad	Ad	Ad	Ad	AA	AA	AA	AA	Ad	Ad	Ad	Ad	AA	Ad	Ad	AB	Ad	Ad	AA	AA	Ad	AA	Ad	Ad	Ad	AB	AA	Ad	AA	AA	AA	AA	Ad	AB
chr1D	367714001	367718000	4000	Ad	AA	AA	AA	AA	Ad	Ad	Ad	AA	AA	AA	AA	AA	AA	AA	Ad	AA	AA	AA	AA	Ad	Ad	AA	AA	Ad	Ad	Ad	AA	Ad	AA	Ad	AA	Ad	AA	AA	Ad	Ad	AA	Ad	Ad	Ad	Ad	Ad	Ad	Ad	Ad
chr1D	367759501	367764000	4500	Ad	AA	Ad	AA	Ad	Ad	AA	Ad	Ad	Ad	Ad	Ad	AA	AA	Ad	Ad	Ad	AA	Ad	AA	Ad	Ad	AA	Ad	Ad	Ad	Ad	BB	AA	Ad	Ad	Ad	AA	AA	Ad	Ad	dd	AB	AA	Ad	AA	Ad	Ad	AA	Ad	AA
chr1D	367873501	367877500	4000	AA	AA	AA	AA	AA	AA	AA	AA	AA	AB	AA	AA	AA	AA	AB	AA	AA	AA	AA	AA	AA	AA	AB	AB	AA	AB	AA	AA	AA	AA	AA	AA	AA	AA	AA	AB	AA	AA	AA	AB	AA	AB	AA	AA	AA	Ad
chr1D	368004501	368009500	5000	Ad	Ad	Ad	AA	Ad	AA	Ad	Ad	Ad	Ad	Ad	Ad	Ad	Ad	Ad	Ad	Ad	Ad	Ad	Ad	Ad	Ad	AA	Ad	Ad	Ad	Ad	AB	Ad	AA	Ad	Ad	Ad	AA	Ad	dd	AA	AB	Ad	Ad	AA	Ad	Ad	AA	Ad	AA
chr1D	368189001	368202500	13500	AA	AA	AA	AA	AA	AA	AA	AA	AA	AA	AA	AA	AA	AA	AA	AA	AA	AA	AA	AA	AA	AA	AA	AA	AA	AA	AA	AA	AA	AA	AA	AA	AA	AA	AA	AA	dd	AA	AA	AB	AA	AA	AA	AA	AA	AA
chr1D	368355001	368360500	5500	AB	AA	AA	AA	AA	AA	AA	AA	AA	AA	AA	AA	AA	AA	AA	AA	AA	AA	AA	AA	AB	AA	AA	AA	AA	AA	AA	AA	AA	AA	AA	AA	AA	AA	AA	AA	AA	AA	AA	AA	AA	AA	AA	AA	AA	AA
chr1D	368687001	368755000	68000	AA	AA	AA	AA	AA	AA	AA	AA	AA	AA	AA	AA	AA	AA	AA	AA	AA	AA	AA	AA	AA	AA	AA	AA	AA	AA	AA	AA	AA	AA	AA	AA	AA	AA	AA	AA	AA	AA	AA	AA	AA	AA	AA	AA	AA	AA
chr1D	368778501	368782500	4000	AA	AA	AA	AB	AA	AA	AA	AA	AA	AA	AA	AA	AA	AA	AA	AA	AA	AA	AA	AA	AA	AB	AA	AA	AA	AA	AA	AA	AA	AA	AA	AA	AA	AA	AA	AB	AA	AA	AB	AA	AA	AA	AA	AA	AB	AA
chr1D	368785001	368790000	5000	dd	AA	AA	AA	AA	AA	AA	AA	AA	AA	AA	AA	AA	AA	AA	AA	AA	AA	AA	AA	AA	AA	AA	AA	AA	AA	AA	AA	Ad	AA	AA	AA	AA	AA	AA	AB	dd	AA	AA	AA	AA	AA	AA	AA	AA	AA
chr1D	368848001	368860000	12000	AA	Ad	AA	Ad	AA	AA	AA	AA	AA	dd	Ad	AA	AA	AA	AA	AA	AA	AA	AA	dd	AA	AA	AA	AA	AA	AA	AA	AA	dd	AA	AA	AA	AA	AA	AA	AA	Ad	Ad	AA	Ad	AA	Ad	AA	Ad	AA	Ad
chr1D	368954501	368962000	7500	AA	AA	AA	AA	AA	AA	AA	AA	AA	AA	AA	AA	AA	AA	AA	AA	AA	AA	AA	AA	AA	AA	AA	AA	AA	AA	AA	AA	AA	AA	AA	AA	AA	AA	AA	AA	AA	AA	AA	AA	AA	AA	AA	AA	AA	AA
chr1D	369199001	369206500	7500	AA	AA	AA	AA	AA	AA	AA	AA	AA	AA	AB	AA	AA	AA	AA	AA	AA	AA	AA	AA	AA	AA	AA	AA	AA	AA	AA	AA	AA	AA	AA	AA	AA	AA	AA	AB	dd	AA	AA	AB	AA	AA	AA	AA	AA	AA
chr1D	369447001	369454000	7000	AA	AA	AA	AA	AA	Ad	Ad	Ad	AA	AA	AA	AA	AA	AA	AA	AA	AA	AA	AA	AA	AA	AA	AA	AA	AA	AA	AA	AA	AA	AA	AA	AA	AA	AA	AA	AA	dd	AA	AA	AA	AA	AA	AA	AA	AA	AB
chr1D	369811001	369821000	10000	Ad	Ad	Ad	Ad	Ad	Ad	Ad	Ad	Ad	Ad	Ad	Ad	Ad	Ad	Ad	Ad	Ad	Ad	Ad	Ad	Ad	Ad	Ad	Ad	Ad	Ad	Ad	Ad	Ad	Ad	Ad	Ad	Ad	Ad	Ad	Ad	dd	Ad	Ad	Ad	Ad	Ad	Ad	Ad	Ad	Ad
chr1D	369874001	369884500	10500	Ad	Ad	Ad	Ad	Ad	Ad	dd	Ad	dd	Ad	dd	dd	Ad	Ad	dd	dd	dd	Ad	dd	dd	Ad	dd	Ad	Ad	Ad	Ad	Ad	dd	dd	dd	Ad	dd	dd	dd	Ad	dd	dd	dd	dd	dd	Ad	dd	Ad	dd	dd	dd
chr1D	370887001	370892000	5000	AA	AA	AA	AA	AA	AA	AA	AA	AA	Ad	Ad	AA	Ad	AA	AA	AA	AA	AA	AA	Ad	AA	AA	AA	AA	AA	Ad	Ad	BB	AA	AA	AA	AA	AA	AA	AA	dd	AA	AA	AA	Ad	AA	Ad	AA	AA	AA	AA
chr1D	370928501	370950500	22000	AA	AA	AA	AA	AA	AA	AA	AA	AA	AA	AA	AA	AA	AA	AA	AA	AA	AA	AA	AA	AA	AA	AA	AA	AA	AA	AA	AA	AA	AA	AA	AA	AA	AA	AA	AA	AA	AB	AA	AA	AA	AA	AA	AA	AA	AA
chr1D	371685501	371689500	4000	dd	dd	dd	dd	dd	Ad	dd	dd	Ad	Ad	Ad	dd	dd	dd	dd	dd	dd	dd	dd	dd	Ad	Ad	dd	Ad	dd	dd	dd	dd	dd	dd	Ad	dd	dd	dd	dd	dd	dd	dd	dd	dd	dd	dd	dd	dd	dd	dd
chr1D	371714501	371720500	6000	AA	AA	AA	AA	AA	AA	AA	AA	AA	Ad	AB	AA	AA	AA	AA	AA	AA	AA	AA	AA	AA	AA	AA	AA	AB	AA	AA	AA	AA	AA	AA	AA	AA	AA	AB	AB	AA	AB	AA	AA	AA	AA	AB	AA	AA	AA
chr1D	372299001	372304000	5000	Ad	Ad	Ad	dd	Ad	Ad	Ad	Ad	Ad	Ad	Ad	Ad	Ad	Ad	Ad	Ad	Ad	Ad	Ad	Ad	Ad	Ad	Ad	Ad	Ad	Ad	Ad	Ad	Ad	Ad	Ad	Ad	Ad	AA	Ad	Ad	Ad	Ad	Ad	Ad	Ad	Ad	Ad	Ad	Ad	Ad
chr1D	372786501	372793000	6500	AA	AA	AA	AA	AA	AA	AA	AA	AA	AA	Ad	AA	AA	AA	AA	Ad	Ad	AA	Ad	AA	AA	Ad	AA	Ad	Ad	AA	Ad	AB	AA	Ad	AA	Ad	AA	AA	Ad	Ad	Ad	AA	Ad	Ad	AA	Ad	Ad	Ad	Ad	Ad
chr1D	372786501	372799500	13000	Ad	Ad	Ad	AA	AA	AA	AA	Ad	AA	Ad	Ad	Ad	AA	AA	Ad	Ad	Ad	AA	Ad	Ad	Ad	Ad	Ad	Ad	Ad	Ad	Ad	AA	AA	Ad	AA	Ad	AA	AA	Ad	dd	dd	AA	Ad	Ad	AA	Ad	Ad	Ad	Ad	Ad
chr1D	372795501	372799500	4000	Ad	Ad	Ad	AA	Ad	AA	Ad	Ad	Ad	Ad	Ad	Ad	Ad	Ad	Ad	AA	Ad	AA	Ad	Ad	Ad	Ad	Ad	Ad	Ad	Ad	Ad	AB	Ad	AA	AA	Ad	AA	Ad	Ad	dd	dd	AA	Ad	Ad	AA	Ad	Ad	Ad	Ad	Ad
chr1D	372819501	372830500	11000	AA	AA	AA	AA	Ad	AA	AA	AA	AA	AA	AA	AA	AA	AA	AA	AA	AA	AA	AA	AA	AA	AA	AA	AA	AA	AA	AA	AA	AA	AA	AA	AA	AA	AA	AA	Ad	dd	Ad	Ad	Ad	AA	Ad	AA	AA	Ad	AA
chr1D	372948501	372954500	6000	dd	dd	dd	dd	dd	dd	dd	dd	dd	dd	dd	dd	dd	dd	dd	dd	dd	dd	dd	dd	dd	dd	dd	dd	dd	dd	dd	dd	dd	dd	dd	dd	dd	dd	dd	dd	dd	dd	dd	dd	dd	dd	dd	dd	dd	dd
chr1D	373015501	373019500	4000	AA	AA	AA	AA	Ad	AA	AA	AA	BB	AA	AA	AA	BB	AA	BB	BB	AB	AA	AA	AA	AA	AA	AA	AA	AA	AA	AA	AA	AA	AA	AB	BB	AA	AA	AA	AA	dd	Ad	AA	AA	AA	BB	AB	AA	AA	BB
chr1D	373508501	373515500	7000	AA	AA	AA	AA	AA	AA	AA	AA	AA	AA	AA	AA	AA	AA	AA	AA	AA	AA	AA	AA	AA	AA	AA	AA	AA	AA	AA	AA	AA	AA	AA	AA	AA	AA	AA	AA	dd	AA	AA	AA	AA	AA	AA	AA	AA	AA
chr1D	373575001	373582000	7000	AA	AA	AA	AA	AA	Ad	AA	dd	AA	AA	AA	AA	Ad	AA	AA	AA	AA	AA	AA	AA	AA	AA	AA	AA	dd	AA	dd	Ad	AA	AA	AA	AA	AA	AA	AA	Ad	dd	AA	AA	AA	AA	AA	AA	AA	Ad	AA
chr1D	373777501	373781500	4000	AA	AA	AA	Ad	Ad	AA	AA	AA	AA	AA	AA	AA	AA	AA	AA	AA	AA	AA	AA	AA	AA	AA	AA	AA	AA	AA	AA	AB	AA	AA	AA	AA	AA	AA	AA	dd	AA	AB	AA	Ad	AA	AA	AA	AA	Ad	AA
chr1D	373796001	373807500	11500	AA	AA	AA	AA	AA	AA	AA	AA	AA	AA	AA	AA	AA	AA	AA	AA	AA	AA	AA	AA	AA	AA	AA	AA	AA	AA	AA	AA	AA	AA	AA	AA	AA	AA	AA	AB	AA	AA	AA	AA	AA	AA	AA	AA	AB	AA
chr1D	373864001	373871000	7000	AA	AA	Ad	AA	AA	AA	AA	Ad	AA	Ad	Ad	AA	AA	AA	AA	AA	Ad	AA	AA	AA	Ad	Ad	AA	Ad	Ad	AA	Ad	AA	AA	Ad	AA	AA	Ad	AA	AA	dd	dd	AA	Ad	Ad	AA	Ad	Ad	Ad	Ad	Ad
chr1D	374306001	374311500	5500	Ad	Ad	Ad	Ad	Ad	Ad	Ad	Ad	Ad	Ad	Ad	Ad	Ad	Ad	Ad	Ad	Ad	Ad	Ad	Ad	Ad	Ad	Ad	Ad	Ad	Ad	Ad	Ad	AA	Ad	AA	Ad	Ad	Ad	Ad	dd	Ad	Ad	dd	dd	Ad	dd	Ad	dd	dd	Ad
chr1D	374626501	374631500	5000	AA	AA	AA	AA	AA	AA	dd	AA	AA	AA	AA	AA	AA	AA	AA	AA	AA	AA	AA	AA	AA	AA	AA	AB	AB	AA	AB	AA	AA	AA	AA	AA	AA	AA	AA	AA	AA	AA	AA	AA	AA	AA	AA	AA	AA	AB
chr1D	374956501	374961000	4500	AA	AA	AA	AA	AA	AA	Ad	AA	AA	AA	AA	Ad	AA	AA	Ad	Ad	Ad	AA	AA	AA	AA	AA	Ad	AA	AA	AA	AA	AA	Ad	Ad	Ad	AA	AA	AA	Ad	Ad	Ad	AA	AA	Ad	AA	Ad	AA	AA	AA	AA
chr1D	376677501	376709000	31500	AA	AA	AA	AA	AA	AA	AA	AA	AA	AA	AA	AA	AA	AA	AA	AA	AA	AA	AA	AA	AA	AA	AA	AA	AA	AA	AA	AA	AA	AA	AA	AA	AA	AA	AA	AA	dd	AA	AA	AA	AA	AA	AA	AA	AA	AA
chr1D	377247501	377252500	5000	AA	AB	AB	AA	AA	AA	AA	AA	dd	AA	AA	AA	AA	AA	AA	AA	AA	AA	AA	AA	AA	AA	AA	AA	AA	AA	AA	AA	AA	AA	AA	AA	AA	AA	AA	AB	AA	AA	AA	AA	AA	AA	AA	AA	AA	AA
chr1D	377783501	377790500	7000	Ad	Ad	AA	AA	Ad	Ad	AA	Ad	AA	Ad	Ad	AA	AA	AA	Ad	AA	AA	AA	Ad	Ad	AA	AA	AA	AA	AA	AA	AA	AA	Ad	AA	AA	AA	Ad	AA	AA	Ad	AB	Ad	Ad	AA	AA	Ad	Ad	Ad	Ad	Ad
chr1D	377826501	377833000	6500	AA	AA	AA	AA	AA	AA	AA	dd	AA	AA	AA	AA	AA	AA	AA	AA	AA	AA	AA	AA	AA	AA	AA	AA	AA	AA	AA	AA	AA	AA	AA	AA	AA	AA	AA	AA	AA	Ad	AA	AA	AA	AA	AA	AA	Ad	AA
chr1D	378419001	378427000	8000	AA	AA	AA	AA	AA	AA	AA	AA	AB	AA	AA	AA	AA	AA	AA	AA	AA	dd	AA	AA	AA	AA	AA	AA	AA	AA	AA	AA	AA	AA	AA	AA	AA	AA	AA	AA	AA	AA	AA	AA	AA	AA	AB	AA	AA	AA
chr1D	378624001	378639500	15500	AA	AA	AA	AA	AA	AA	AA	AA	AA	AA	AA	AA	AA	AA	AA	AA	AA	AA	AA	AA	AA	AA	AA	AA	AA	AB	AA	AA	AA	AA	AA	AA	AA	AA	AA	AB	dd	AA	AA	AB	AA	AA	AA	AA	AA	AA
chr1D	378809501	378814000	4500	Ad	Ad	Ad	Ad	Ad	AA	Ad	Ad	AA	Ad	Ad	Ad	Ad	AA	Ad	Ad	Ad	Ad	Ad	Ad	Ad	Ad	AA	Ad	Ad	Ad	Ad	AA	Ad	Ad	Ad	Ad	Ad	Ad	Ad	dd	Ad	Ad	Ad	Ad	Ad	Ad	Ad	Ad	Ad	Ad
chr1D	379008001	379014500	6500	Ad	Ad	Ad	Ad	Ad	Ad	Ad	Ad	Ad	Ad	Ad	Ad	Ad	Ad	Ad	Ad	Ad	Ad	Ad	Ad	Ad	Ad	Ad	Ad	Ad	Ad	Ad	AA	Ad	Ad	Ad	Ad	AA	Ad	Ad	Ad	dd	Ad	Ad	Ad	Ad	Ad	Ad	Ad	Ad	Ad
chr1D	379225501	379232500	7000	AA	AA	AA	AA	AA	AA	AA	AA	AA	AA	AA	AA	AA	AA	AA	AA	AA	AA	AA	AA	AA	AA	AA	AA	AA	AA	AA	AA	AA	AA	AA	AA	AA	AA	AA	AA	dd	AA	AA	AA	AA	AA	AA	AA	AA	AA
chr1D	379810501	379815000	4500	AA	AA	Ad	AA	AA	AA	AA	AA	AA	AA	AA	AA	AA	AA	AA	AA	AA	AA	Ad	AA	Ad	AA	AA	Ad	AA	AA	Ad	AB	AA	AA	AA	AA	AA	dd	AA	Ad	AA	AB	AA	Ad	AA	AA	AA	Ad	AA	AA
chr1D	381056001	381061500	5500	Ad	Ad	Ad	Ad	Ad	Ad	Ad	Ad	AA	Ad	AA	Ad	AA	Ad	Ad	AA	AA	Ad	Ad	Ad	Ad	Ad	Ad	AA	Ad	Ad	Ad	AA	Ad	Ad	Ad	Ad	AA	Ad	AA	AA	dd	Ad	Ad	Ad	AA	Ad	AA	Ad	Ad	AA
chr1D	381236001	381240500	4500	AA	AB	AB	AB	AA	AA	AA	AA	AA	AA	AA	AA	AA	AB	AB	AA	AB	AA	AA	AB	AA	AA	AB	AA	AA	AA	AA	AA	AB	AB	AB	BB	AB	AB	AA	AA	dd	AA	AA	AA	AA	AA	AA	AA	AA	AA
chr1D	381330501	381338500	8000	AA	AA	AA	AA	AA	AA	AA	AA	AA	AA	AA	AA	AA	AA	AA	AA	AA	AA	AA	AA	AA	AA	AA	AA	AA	AA	AA	AA	AA	AA	AA	AA	AB	AA	AA	AA	dd	Ad	AA	AA	AA	AA	AA	AA	AA	AA
chr1D	381330501	381350500	20000	AA	AA	AA	AA	AA	AA	AA	AA	AA	AA	AA	AA	AA	AA	AA	AA	AA	AA	AA	AA	AA	AA	AA	AA	AA	AA	AA	AA	AA	AA	AA	AA	AA	AA	AA	AA	dd	Ad	AA	Ad	AA	AA	AA	AA	AA	AA
chr1D	381454001	381459500	5500	AA	AA	AA	AB	AA	AA	AA	AA	AA	AA	AA	AB	AA	AA	AA	AA	AA	AA	AA	AA	AA	AA	AA	AA	AA	AA	AA	AA	AB	AA	AB	AA	AA	AA	AA	AA	dd	AA	AA	AA	AA	AA	AA	AA	AA	AA
chr1D	381519001	381524500	5500	AA	AA	AA	AB	AA	AA	AA	AA	AA	AA	AA	AA	AA	AA	AA	AA	AA	AA	AA	AA	AB	AA	AA	AA	AA	AA	AA	AA	AB	AA	AA	AB	AB	AA	AB	AA	dd	AB	AA	AA	AA	AA	AA	AA	AA	AB
chr1D	381616001	381621000	5000	AA	AA	AA	AB	AA	AA	AA	AA	AA	AA	AA	AA	AA	AA	AA	AA	AA	AA	AA	AA	AA	AA	AA	AA	AA	AA	AA	AA	AA	AA	AA	Ad	AA	AA	AA	AA	dd	AA	AA	AA	AA	AA	AA	AA	AA	AA
chr1D	381665501	381670000	4500	AA	AA	Ad	Ad	Ad	AA	AA	Ad	Ad	Ad	Ad	Ad	Ad	Ad	Ad	Ad	Ad	Ad	Ad	Ad	Ad	Ad	Ad	AA	Ad	AA	Ad	AB	AA	Ad	Ad	Ad	Ad	Ad	Ad	Ad	dd	AA	AA	Ad	AA	Ad	Ad	AA	Ad	Ad
chr1D	381666001	381677000	11000	AB	AA	AA	AA	AA	AA	AA	AA	AA	AA	AA	AA	AA	AB	AA	AA	AA	AA	Ad	AA	AA	AA	AA	AA	AA	AA	AA	AB	AA	AB	AA	AA	AA	AA	AA	Ad	dd	AA	AA	Ad	AA	Ad	AA	AA	Ad	Ad
chr1D	381697501	381704500	7000	AA	AA	AA	AA	AA	AA	AA	AA	AA	AA	AA	AA	AA	AA	AA	AA	AA	AA	AA	AA	AA	AA	AA	AA	AA	AA	AA	AA	AA	AA	AA	AA	AA	AA	AA	AA	dd	AA	AA	AA	AA	AA	AA	AA	AA	AA
chr1D	381771501	381776500	5000	AA	AA	AA	AA	AA	AA	AB	AA	AA	AA	AA	AA	AA	AA	AA	AB	AA	AA	AA	AA	AA	AA	AA	AA	AA	AB	AA	AA	AA	AA	AA	AA	AA	AA	AA	Ad	dd	AA	AA	AA	AA	AA	AA	AA	AA	AA
chr1D	381829001	381833500	4500	AB	AB	AB	BB	BB	BB	BB	AB	AB	BB	AB	BB	BB	BB	AB	BB	BB	AB	AB	BB	AB	BB	BB	AB	BB	BB	AB	BB	AB	AB	BB	AB	BB	BB	BB	AA	dd	BC	BB	AB	BB	AB	AB	AB	AB	BB
chr1D	382100501	382105500	5000	AA	AA	AA	AA	AA	AA	AA	AA	AA	AA	AA	AA	AA	AA	AA	AA	AA	AA	AA	AA	AA	AA	AA	AA	AA	AA	AA	AA	AA	AA	AA	AA	AA	AA	AA	AB	dd	AA	AA	AA	AA	AA	AA	AA	AA	AA
chr1D	382287001	382293500	6500	AA	AA	AA	AA	AA	AA	AA	AA	AA	AA	AA	AA	AA	AA	AA	AA	AA	AA	AA	AA	AA	AA	AA	AA	Ad	AA	AA	AA	AA	AA	AA	AA	AA	AA	AA	Ad	dd	AA	Ad	Ad	AA	Ad	Ad	Ad	Ad	Ad
chr1D	382355501	382365500	10000	AA	AA	AA	AA	AA	AA	AA	AA	AA	AA	AA	AA	AA	AA	AA	AA	AA	AA	AB	AA	AA	AA	AA	AA	AA	AA	AA	AA	AA	AA	AA	AA	AA	AA	AA	AA	dd	AA	AA	Ad	AA	AA	AA	AA	AA	Ad
chr1D	382472501	382479000	6500	AA	AA	AA	AA	AA	AA	AA	AA	AA	AA	AA	AA	AA	AA	AA	AA	AA	AA	AA	AA	AA	AA	AA	AA	AA	AA	AA	AA	AA	AA	AA	AA	AA	AA	AA	AA	Ad	Ad	AA	AA	AA	AA	AA	AA	AA	AA
chr1D	382807501	382811500	4000	AA	AA	AA	AA	AA	AB	AA	AA	AA	AA	AA	AA	AB	AB	AA	AA	AA	AA	AA	AA	AA	AA	AA	AA	AA	AB	AA	AA	AA	AA	AB	AA	AA	AB	AA	AB	dd	AB	AA	AA	AA	AA	AA	AA	AA	AA
chr1D	382960001	382964000	4000	AA	AA	AA	AA	AA	AB	AA	AA	AA	AB	AA	AB	AA	AA	AA	AA	AA	AA	AB	AA	AA	AA	AA	AA	AA	AB	AB	AA	AA	AB	AA	Ad	AA	AA	AA	AB	dd	AA	AA	AA	AA	AA	Ad	AA	AA	Ad
chr1D	382960001	382969500	9500	AA	AA	AA	AA	AA	AA	AA	AA	AA	AA	AA	AA	AA	AA	AA	AA	AA	AA	AA	AA	AA	AA	AA	AA	AA	AA	AA	AA	AA	AA	AA	AA	AA	AA	AA	AA	dd	AA	AA	AA	AA	AA	AA	AA	AA	AA
chr1D	383015501	383019500	4000	AA	AA	AA	AA	AA	AA	AA	AA	AA	AA	AA	AA	AA	AA	AA	AA	AA	AA	AA	AA	AA	AA	AA	AA	AA	AA	AA	AA	AA	AA	AA	AA	AA	AA	AA	AB	dd	AA	AA	AB	AA	AA	AA	AA	AA	AA
chr1D	383045001	383049000	4000	AA	AA	AA	Ad	AA	Ad	AA	AA	AA	AA	AA	AA	AA	AA	AA	AA	AA	AA	AA	AA	AA	AA	AA	AA	AA	AA	AA	Ad	AA	AA	AA	AA	Ad	AA	AA	AB	dd	AB	AA	AA	AA	AA	AB	AA	AA	AA
chr1D	383197501	383202000	4500	Ad	AA	AA	AA	Ad	AA	AA	AA	AA	AA	AA	Ad	AA	AA	AA	AA	AA	AA	AA	AA	AA	AA	AA	AA	AA	AA	AA	AA	AA	AA	AA	AA	AA	AB	AA	AA	dd	AA	AA	AA	AA	AA	AA	AA	AA	AB
chr1D	383197501	383209000	11500	Ad	AA	AA	AA	AA	AA	AA	AA	AA	AA	AA	AA	AA	AA	AA	AA	AA	AA	AA	AA	AA	AA	AA	AA	AA	AA	AA	AA	AA	AA	AA	AA	AA	AA	AA	AA	dd	AA	AA	AA	AA	AA	AA	AA	AA	Ad
chr1D	383205001	383214500	9500	AA	AA	AA	AA	AA	Ad	AA	Ad	AA	AA	AA	AA	Ad	AA	AA	AA	AA	AA	AA	AA	AA	AA	AA	AA	AA	AA	AA	AA	AA	AA	AA	AA	AA	AA	AA	Ad	dd	AA	AA	Ad	AA	AA	Ad	AA	Ad	Ad
chr1D	383217001	383230000	13000	AA	AA	AA	AA	AA	AA	AA	AA	AA	AA	AA	AA	AA	AA	AA	AA	AA	AA	AA	AA	AA	AA	AA	AA	AA	AA	AA	AA	AA	AA	AA	AA	AA	AA	AA	AA	dd	AA	Ad	AA	AA	AA	AA	AA	AA	AA
chr1D	383273501	383279500	6000	AA	AA	AB	AA	AA	Ad	Ad	AA	AA	AA	AA	AA	AA	AA	AA	AA	AA	AA	AA	Ad	AA	AA	AA	AA	AA	AA	AA	AA	Ad	AA	AA	AA	AA	Ad	AA	AA	Ad	AA	Ad	Ad	AA	AA	Ad	Ad	AA	Ad
chr1D	383273501	383286500	13000	AA	AA	AA	AA	AA	AA	AA	AA	AA	AA	AA	AA	AA	AA	AA	AA	AA	AA	AA	AA	AA	AA	AA	AA	AA	AA	AA	AA	AA	AA	AA	AA	AA	Ad	AA	Ad	Ad	AA	Ad	Ad	AA	Ad	Ad	Ad	AA	Ad
chr1D	383282001	383286500	4500	Ad	Ad	AA	AA	Ad	AA	Ad	AA	AA	Ad	AA	Ad	AA	AA	AA	Ad	Ad	AA	Ad	Ad	AA	AA	Ad	AA	AA	AA	AA	AA	AA	AA	AA	AA	AA	Ad	Ad	Ad	dd	AA	Ad	Ad	AA	Ad	Ad	Ad	Ad	Ad
chr1D	383540501	383553000	12500	AA	AA	AA	AA	AA	AA	AA	AA	AA	AA	AA	AA	AA	AA	AA	AA	AA	AA	AA	AA	AB	AA	AA	AA	AA	AA	AA	AA	AA	AA	AA	AA	AA	AA	AA	AA	dd	AA	AA	AA	AA	AA	AA	AA	AA	AA
chr1D	383904501	383909500	5000	AA	AA	AA	AA	AA	AA	Ad	AA	AA	AA	AA	Ad	Ad	AA	AA	AA	AA	AA	Ad	AA	AA	AA	AA	AA	AA	AA	AA	AA	AA	AA	AA	AA	AA	AA	AA	Ad	dd	Ad	Ad	AA	AA	Ad	Ad	AA	AA	AA
chr1D	383975501	383981500	6000	AA	AA	AA	AA	AA	AA	AA	AA	AA	AA	AA	AA	AA	AB	AA	AA	AA	AA	AA	AA	AA	AA	AB	AA	AA	AA	AA	AA	AA	AA	AA	AB	AA	AA	AA	Ad	dd	AA	AA	Ad	AA	AA	AA	AA	AA	AA
chr1D	384001501	384005500	4000	AA	AA	AA	AA	AA	AA	AA	AA	AA	AA	AA	AB	AA	AA	AA	AB	AA	AA	AA	AA	AB	AA	AA	AA	AA	AA	AA	AA	AA	AA	AA	AB	AB	AA	AB	AA	dd	AA	AA	AA	AA	AA	AA	AA	AA	AB
chr1D	384521501	384526000	4500	Ad	AA	AA	Ad	AA	Ad	AA	Ad	Ad	Ad	AA	Ad	Ad	AA	AA	AA	Ad	Ad	Ad	Ad	AA	Ad	AA	AA	AA	Ad	AA	AA	AA	AA	AA	AA	Ad	Ad	AA	Ad	dd	Ad	Ad	Ad	AA	Ad	Ad	Ad	Ad	Ad
chr1D	384608501	384612500	4000	AA	AA	AA	AB	AA	AA	AA	AA	AA	AA	AA	AA	AA	AA	AA	AA	AA	AA	AA	AA	AA	AA	AA	AA	Ad	AA	AA	AB	AA	AA	AA	AA	AA	AA	AA	AA	dd	AB	AA	AA	AA	AA	AA	AA	AA	AA
chr1D	384757001	384761000	4000	AB	AB	AA	AA	AA	AA	AA	AA	AA	AA	AA	AB	AA	AB	AB	AA	AA	AA	AA	AA	AA	AA	AA	AB	AA	AA	AA	AA	AB	AA	AA	AA	AA	AB	AA	BB	dd	AA	AA	AA	AA	AA	AA	AA	AA	AA
chr1D	384766501	384770500	4000	AA	AB	AB	AA	AA	AA	AA	AA	AA	Ad	AA	AA	AA	AA	AA	AA	AA	AA	AA	AA	AB	AA	AA	AA	AA	AA	AA	AB	Ad	AA	AA	AA	AA	AA	AA	AA	dd	AA	AA	Ad	AA	Ad	AA	AA	Ad	Ad
chr1D	385094001	385105500	11500	AA	AA	AA	AA	AA	AA	AA	dd	AA	AA	AA	AA	AA	AA	AA	AA	AA	AA	AA	AA	AA	AA	AA	AA	AA	AA	AA	AA	AA	AA	AA	AA	AA	AA	AA	Ad	AA	AA	AA	AA	AA	AA	AA	AA	AA	AA
chr1D	385661501	385667500	6000	AA	AA	Ad	AA	Ad	Ad	Ad	Ad	AA	AA	Ad	AA	AA	AA	Ad	Ad	Ad	Ad	AA	AA	AA	Ad	AA	Ad	AA	Ad	Ad	AB	AA	AA	AA	AA	AA	AA	Ad	Ad	AA	AA	Ad	Ad	AA	AA	AA	AA	Ad	AA
chr1D	385843501	385847500	4000	Ad	AA	AA	Ad	Ad	Ad	Ad	Ad	Ad	Ad	Ad	Ad	Ad	AA	AA	AA	AA	Ad	Ad	Ad	AA	Ad	Ad	Ad	Ad	AA	Ad	AA	Ad	Ad	Ad	Ad	Ad	AA	AA	Ad	dd	Ad	Ad	AA	Ad	Ad	Ad	Ad	Ad	Ad
chr1D	385843501	385855500	12000	AA	AA	AA	Ad	AA	Ad	AA	AA	AA	Ad	AA	AA	Ad	Ad	AA	AA	AA	AA	AA	Ad	AA	AA	AA	Ad	Ad	AA	AA	AA	AA	AA	AA	AA	AA	Ad	Ad	Ad	dd	Ad	Ad	AA	AA	AA	Ad	AA	Ad	Ad
chr1D	385850001	385855500	5500	Ad	Ad	AA	Ad	AA	Ad	Ad	AA	Ad	Ad	Ad	Ad	Ad	Ad	AA	Ad	AA	Ad	AA	Ad	Ad	AA	Ad	Ad	Ad	Ad	Ad	Ad	AA	Ad	Ad	AA	Ad	Ad	Ad	dd	dd	Ad	Ad	dd	Ad	Ad	Ad	Ad	Ad	dd
chr1D	385869001	385876500	7500	AA	Ad	Ad	AA	AA	AA	AA	Ad	Ad	AA	AA	AA	AA	AA	AA	AA	AA	AA	AA	AA	AA	AA	AA	AA	AA	AA	AA	AA	AA	AA	AA	AA	AA	AA	AA	AA	AA	AA	AA	AA	AA	AA	AA	AA	AA	AA
chr1D	385875001	385880000	5000	AA	AA	dd	AA	AA	AA	AA	AA	AA	AA	AA	AA	AA	AA	AA	AA	AA	AA	AA	AA	AA	AA	AA	AA	AA	AA	AA	AA	AA	AA	AA	AA	AA	AA	AA	AA	AA	AA	AA	AA	AA	AA	AA	AA	AA	AA
chr1D	386074001	386078500	4500	AA	AA	AA	AA	AB	AA	Ad	AA	AA	AA	AA	AA	AA	AA	AA	AA	AB	AA	AA	AA	AA	AA	AA	AA	AA	AA	AA	AA	AA	AA	AA	AA	Ad	AA	AA	AA	AA	Ad	AA	AA	AA	Ad	AA	Ad	Ad	AB
chr1D	386138501	386143000	4500	dd	dd	dd	dd	dd	dd	dd	dd	dd	dd	dd	dd	dd	dd	dd	dd	dd	dd	dd	dd	dd	dd	dd	dd	dd	dd	dd	dd	dd	dd	dd	dd	dd	dd	dd	dd	dd	dd	dd	dd	dd	dd	dd	dd	dd	dd
chr1D	386596001	386603000	7000	Ad	Ad	Ad	Ad	Ad	Ad	Ad	Ad	Ad	Ad	Ad	Ad	Ad	Ad	AA	Ad	dd	Ad	Ad	Ad	Ad	Ad	AA	Ad	Ad	Ad	Ad	AA	Ad	Ad	Ad	Ad	Ad	Ad	Ad	dd	dd	Ad	Ad	dd	Ad	Ad	Ad	Ad	Ad	Ad
chr1D	386720501	386726500	6000	Ad	AA	Ad	Ad	Ad	AA	dd	Ad	AA	AA	AA	Ad	AA	AA	Ad	AA	AA	AA	Ad	AA	AA	AA	AA	AA	AA	Ad	AA	AA	AA	AA	Ad	Ad	AA	Ad	AA	Ad	Ad	Ad	Ad	Ad	AA	Ad	Ad	Ad	Ad	Ad
chr1D	386952501	386957000	4500	Ad	Ad	Ad	Ad	AA	AA	AA	Ad	Ad	Ad	Ad	AA	Ad	AA	AA	AA	Ad	Ad	AA	Ad	Ad	Ad	AA	AA	Ad	Ad	AA	AA	AA	Ad	Ad	AA	AA	AA	AA	Ad	dd	Ad	Ad	Ad	AA	Ad	Ad	Ad	Ad	Ad
chr1D	387012501	387019500	7000	AA	AA	AA	AA	AA	AA	AA	AA	AA	AA	AA	AA	AA	AA	AA	AA	AA	AA	AA	AA	AA	AA	AA	AA	AA	AA	AA	AA	AA	AA	AA	AA	AA	AA	AA	AA	dd	Ad	Ad	AA	AA	AA	AA	AA	AA	AA
chr1D	387040001	387049000	9000	Ad	Ad	Ad	Ad	Ad	Ad	Ad	Ad	Ad	Ad	Ad	Ad	Ad	Ad	Ad	Ad	Ad	Ad	Ad	Ad	dd	Ad	Ad	Ad	Ad	Ad	Ad	Ad	Ad	Ad	Ad	dd	Ad	Ad	Ad	Ad	Ad	Ad	Ad	Ad	Ad	Ad	dd	Ad	Ad	dd
chr1D	387136001	387140000	4000	AA	AA	AA	AA	AA	AA	AA	AA	AA	AA	AA	AB	AA	AA	AA	AA	AA	AA	AB	AA	AA	AA	AB	AA	AA	AA	Ad	AA	AA	Ad	AA	AB	AB	AB	AA	AA	dd	AA	AA	Ad	AA	AA	AA	AA	AA	AA
chr1D	387149001	387153500	4500	AA	AA	AA	AA	AA	AA	AA	AA	AB	AA	AB	AA	AA	AA	AA	AA	AA	AA	AA	AA	AA	AA	AA	AA	AA	AA	AA	AB	AA	AA	AA	AB	AA	AB	AB	AA	dd	AA	AA	AA	AA	AA	AA	AA	AA	AA
chr1D	387238001	387242000	4000	AA	AA	AA	AA	AA	Ad	AA	AA	AA	AA	AA	AA	AA	AA	AA	AA	AA	AA	AA	AA	AA	AA	AA	Ad	AA	AA	AA	AA	AA	AA	AA	AA	AA	AA	Ad	AA	Ad	AA	Ad	Ad	AA	AA	Ad	Ad	Ad	AA
chr1D	387290001	387294000	4000	AA	AA	Ad	Ad	Ad	AA	AA	Ad	AA	Ad	Ad	Ad	Ad	Ad	AB	AA	Ad	Ad	Ad	AA	AA	Ad	Ad	AA	Ad	AA	Ad	AB	Ad	Ad	AA	AA	Ad	Ad	AA	Ad	dd	AA	Ad	Ad	AA	Ad	Ad	Ad	AA	AA
chr1D	387660001	387673500	13500	AA	AA	Ad	AA	AA	AA	AA	Ad	AA	AA	Ad	Ad	Ad	Ad	AA	Ad	Ad	AA	AA	AA	Ad	AA	AA	Ad	Ad	Ad	Ad	AB	AA	AA	AA	AA	Ad	AA	Ad	Ad	dd	AA	Ad	Ad	AA	Ad	Ad	Ad	Ad	Ad
chr1D	388257001	388261500	4500	AA	AA	AA	AA	AA	AA	AA	AA	Ad	AA	AA	AA	AA	AA	AA	AA	Ad	AA	AA	AA	AA	AA	AA	AA	AA	AA	AA	AB	AA	AA	AA	AA	AA	AA	AA	dd	AA	AB	AA	Ad	AA	AA	AA	AA	AA	AA
chr1D	388426501	388435000	8500	dd	Ad	Ad	Ad	Ad	Ad	Ad	Ad	Ad	Ad	Ad	Ad	Ad	Ad	Ad	Ad	Ad	Ad	Ad	Ad	Ad	Ad	Ad	Ad	Ad	Ad	Ad	Ad	Ad	Ad	Ad	Ad	Ad	Ad	Ad	dd	dd	Ad	dd	dd	Ad	Ad	Ad	dd	Ad	Ad
chr1D	388969501	388975500	6000	dd	dd	dd	dd	dd	dd	dd	dd	dd	dd	dd	dd	dd	dd	dd	dd	dd	dd	dd	dd	dd	dd	dd	dd	dd	dd	dd	dd	dd	dd	dd	dd	dd	Ad	dd	dd	dd	dd	dd	dd	dd	dd	dd	dd	dd	dd
chr1D	389375501	389380000	4500	AA	AB	AA	AA	AA	AA	AA	AA	AA	AA	AA	AB	AA	AA	AA	AA	AA	AA	AA	AA	AA	AA	AA	AA	AA	AA	AA	AA	AA	AA	AA	AA	AA	AA	AA	AA	AA	AA	AA	AA	AA	AB	Ad	AA	AA	Ad
chr1D	389443501	389448000	4500	AA	AA	Ad	AA	AA	AA	AA	Ad	AA	AA	AA	AA	Ad	AA	Ad	AA	Ad	AA	AA	Ad	AA	AA	AA	AA	AA	AA	Ad	AA	Ad	AA	Ad	AA	AA	Ad	AA	AA	dd	AA	Ad	Ad	AA	AA	Ad	AA	Ad	AA
chr1D	389475001	389479000	4000	AA	Ad	Ad	Ad	Ad	Ad	Ad	Ad	Ad	Ad	Ad	Ad	Ad	Ad	Ad	Ad	Ad	Ad	Ad	Ad	Ad	Ad	AA	Ad	Ad	Ad	Ad	Ad	Ad	Ad	Ad	AA	Ad	AA	Ad	dd	dd	Ad	Ad	Ad	Ad	Ad	Ad	Ad	Ad	Ad
chr1D	389589501	391237000	1647500	AA	AA	AA	AA	AA	AA	AA	AA	AA	AA	AA	AA	AA	AA	AA	AA	AA	AA	AA	AA	AA	AA	AA	AA	AA	AA	AA	AA	AA	AA	AA	AA	AA	AA	AA	AA	dd	AA	AA	AA	AA	AA	AA	AA	AA	AA
chr1D	390954501	391237000	282500	AA	AA	AA	AA	AA	AA	AA	AA	AA	AA	AA	AA	AA	AA	AA	AA	AA	AA	AA	AA	AA	AA	AA	AA	AA	AA	AA	AA	AA	AA	AA	AA	AA	AA	AA	AA	dd	AA	AA	AA	AA	AA	AA	AA	AA	AA
chr1D	391746001	391771500	25500	AA	AA	AA	AA	AA	AA	AA	AA	AA	AA	AA	AA	AA	AA	AA	AA	AA	AA	AA	AA	AA	AA	AA	AA	AA	AA	AA	AA	AA	AA	AA	AA	AA	AA	AA	AA	dd	AA	AA	AA	AA	AA	AA	AA	AA	AA
chr1D	391746001	391940500	194500	AA	AA	AA	AA	AA	AA	AA	AA	AA	AA	AA	AA	AA	AA	AA	AA	AA	AA	AA	AA	AA	AA	AA	AA	AA	AA	AA	AA	AA	AA	AA	AA	AA	AA	AA	AA	dd	AA	AA	AA	AA	AA	AA	AA	AA	AA
chr1D	391890001	391940500	50500	AA	AA	AA	AA	AA	AA	AA	AA	AA	AA	AA	AA	AA	AA	AA	AA	AA	AA	AA	AA	AA	AA	AA	AA	AA	AA	AA	AA	AA	AA	AA	AA	AA	AA	AA	AA	dd	AA	AA	AA	AA	AA	AA	AA	AA	AA
chr1D	391980001	391984000	4000	AA	AA	AA	AA	Ad	AA	AA	AA	AA	AA	AA	Ad	AA	AA	AA	Ad	Ad	AA	AA	AA	Ad	AA	AA	Ad	AA	Ad	AA	AB	AA	Ad	AA	AA	AA	AA	AA	Ad	Ad	AB	Ad	Ad	AA	Ad	Ad	AA	Ad	Ad
chr1D	392040001	392044500	4500	AA	AA	AA	AA	AA	AA	AA	AA	AA	AA	AA	AA	AA	AA	AA	AA	AA	AA	AA	AA	AA	AA	AA	AA	AA	AA	AA	AA	AA	AA	AA	AA	AA	AA	AA	AA	dd	AA	AA	AA	AA	AA	AA	AA	Ad	AA
chr1D	392049001	392054500	5500	AA	AA	AA	AA	AA	AA	AA	AA	AA	AA	AA	AA	AA	AA	AA	AA	AA	AA	AA	AA	AA	AA	AA	AA	AA	AA	AA	AA	AA	AA	AA	AA	AA	AA	AA	AA	Ad	Ad	AA	AA	AA	AA	AA	AA	Ad	AA
chr1D	392220001	392224000	4000	AA	AA	AA	AA	AA	AA	AA	AB	AA	AA	AA	AA	AA	AA	AA	AA	AA	AA	AA	AA	AA	AA	Ad	AA	AA	AA	AA	AA	AA	AA	AA	AA	AA	AA	AA	AA	AA	Ad	AA	AA	AA	AA	AA	AA	AA	Ad
chr1D	392372501	392380000	7500	AA	AA	AA	AA	AA	AA	AA	AA	AA	AA	AA	AA	AA	AB	AA	AA	AA	AA	AA	AA	AA	AA	AA	AA	AA	AA	AA	AA	AA	AA	AA	AA	AA	AA	AA	AA	AA	AA	AA	AA	AA	AA	AA	AA	AA	AA
chr1D	392422501	392427500	5000	AA	AA	AA	AA	AA	AA	AA	AA	AA	AA	AA	AA	AA	AA	AA	AA	AA	AA	AA	AA	AB	AA	AA	AA	AA	AA	AA	AA	AA	AA	AA	AA	AA	AA	AA	Ad	AA	AA	AA	Ad	AA	AA	AB	AA	AA	AA
chr1D	392474001	392480500	6500	Ad	AA	AA	AA	AA	AA	Ad	AA	AA	Ad	AA	AA	AA	AA	AA	Ad	AA	AA	AA	AA	Ad	Ad	AA	AA	AA	AA	AA	AA	AA	Ad	AA	AA	Ad	AA	Ad	Ad	dd	Ad	Ad	Ad	AA	Ad	Ad	Ad	Ad	AA
chr1D	392484001	392488000	4000	AA	AA	AA	AA	AA	AA	AA	AA	AA	AA	AA	AA	AA	AA	AA	AA	Ad	AA	AA	AA	Ad	AA	AA	AA	AA	AA	AA	AA	AA	AA	AA	AA	AA	AA	AA	AA	Ad	Ad	Ad	Ad	AA	Ad	Ad	Ad	Ad	AA
chr1D	392537001	392541000	4000	Ad	Ad	Ad	Ad	Ad	Ad	Ad	Ad	Ad	Ad	Ad	AA	Ad	Ad	AA	Ad	Ad	Ad	Ad	Ad	AA	Ad	Ad	AA	AA	Ad	Ad	Ad	Ad	Ad	AA	Ad	Ad	Ad	AA	Ad	AA	Ad	Ad	Ad	AA	Ad	Ad	Ad	Ad	Ad
chr1D	392594501	392603500	9000	AA	AA	AA	AA	AA	AA	AA	AA	AA	AA	AA	AA	AA	AA	AA	AA	AA	AA	AA	AA	AA	AA	AA	AA	AA	AA	AA	AA	AA	AA	AA	AA	AA	AA	AA	AA	AA	AA	AA	AA	AA	AA	AA	AA	AA	AA
chr1D	392668501	392673000	4500	AB	AB	AB	AA	AB	AB	AB	AA	AA	AA	AA	AA	AA	AA	AA	AB	AA	AB	AA	AB	AB	AA	AB	AB	AB	AA	AA	AA	AA	AA	AB	AA	AB	AA	AB	Ad	AA	AA	AA	Ad	AA	Ad	AA	AA	AA	AA
chr1D	392744501	392748500	4000	AB	AB	AA	AA	AA	AA	AA	AB	AA	AA	AA	AA	AA	AA	AA	AA	AA	AA	AA	AB	AA	AA	AA	AA	AA	AA	AA	AA	AA	AA	AB	AA	AA	AA	AA	AB	AA	AA	AA	AB	AA	AB	AA	AA	AA	AA
chr1D	392817501	392825500	8000	AA	AA	AA	Ad	AA	AA	AA	AA	AA	Ad	Ad	AA	Ad	AA	AA	AA	AA	AA	Ad	AA	Ad	AA	AA	AA	Ad	AA	AA	AA	AA	AA	AA	AA	Ad	Ad	Ad	AA	AA	AA	AA	Ad	AA	AA	AA	AA	Ad	Ad
chr1D	392854001	392861500	7500	AA	AA	AA	AA	AA	AA	AA	AA	AA	AA	AA	AA	AA	AA	AA	AA	AA	AA	AA	AA	AA	AA	AA	AA	AA	AA	AA	AA	AB	AA	AA	AA	AA	AA	AA	AB	AA	AB	AA	AB	AA	AA	AA	AA	AA	AA
chr1D	393140501	393144500	4000	dd	dd	dd	dd	dd	dd	dd	dd	dd	dd	dd	dd	dd	dd	dd	dd	dd	dd	dd	dd	dd	dd	dd	dd	dd	dd	dd	dd	dd	dd	dd	dd	dd	dd	dd	dd	dd	dd	dd	dd	dd	dd	dd	dd	dd	dd
chr1D	393348501	393354500	6000	AA	AA	AA	AA	AA	AA	AA	AA	AA	AA	AA	Ad	AA	AA	AA	AA	AA	AA	AA	AA	AA	AA	Ad	Ad	Ad	AA	Ad	AB	AA	AA	AA	AA	AA	AA	AA	dd	Ad	AA	Ad	Ad	AA	Ad	Ad	Ad	Ad	Ad
chr1D	393713501	393717500	4000	AA	Ad	AA	AA	AA	AA	AA	AA	AA	Ad	AA	Ad	AA	Ad	AA	Ad	AA	Ad	Ad	Ad	AA	AA	AA	AA	AA	AA	AA	Ad	AA	AA	AA	Ad	AA	AA	Ad	Ad	dd	Ad	Ad	Ad	Ad	Ad	Ad	Ad	Ad	AA
chr1D	393795001	393800000	5000	AA	AA	AA	AB	AA	AA	AA	AA	AA	AA	AA	AA	AA	AA	AA	AA	AA	AA	AA	AA	AA	AA	AA	AA	AA	AA	AA	AA	AA	AA	AB	AA	AA	AA	AA	AA	AA	AA	AA	AA	AA	AA	AA	AA	AA	AA
chr1D	393813001	393820000	7000	AA	AA	AA	AA	AA	AA	AA	AA	AA	AA	AA	AA	AA	AA	AA	AA	AA	AA	AA	AA	AA	AA	AA	AA	AA	AA	Ad	AA	AA	AA	AA	AA	AA	AA	AA	Ad	AA	Ad	AA	Ad	AA	AA	AA	AA	AA	Ad
chr1D	393855501	393860500	5000	AA	AA	dd	AA	AA	AA	AA	AA	AA	AA	AA	AA	AA	AA	AA	AA	AA	AA	AA	AA	AA	AA	AB	AA	AA	AA	AA	AA	AA	AA	AA	AA	AA	AA	AA	AA	AA	AA	AA	AA	AA	AA	AA	AA	AA	AA
chr1D	394029501	394034000	4500	Ad	Ad	Ad	Ad	Ad	Ad	AA	Ad	AA	Ad	Ad	AA	Ad	Ad	Ad	Ad	Ad	Ad	Ad	Ad	Ad	Ad	AA	Ad	Ad	AA	Ad	Ad	AA	AA	Ad	Ad	Ad	Ad	Ad	dd	Ad	Ad	Ad	Ad	Ad	Ad	Ad	Ad	Ad	Ad
chr1D	394222501	394226500	4000	dd	dd	Ad	Ad	dd	dd	Ad	dd	dd	dd	dd	dd	dd	dd	dd	dd	dd	dd	dd	dd	Ad	dd	dd	Ad	dd	Ad	dd	Ad	dd	Ad	dd	dd	dd	dd	dd	dd	Ad	dd	dd	dd	dd	dd	dd	dd	dd	dd
chr1D	394587501	394591500	4000	AA	AA	AA	AA	AA	AA	AA	AA	AA	AA	AA	AA	AA	AA	AA	AA	AA	AA	AA	AA	AA	AA	AA	AA	AA	AA	AA	AA	AA	AA	AA	AA	AA	AA	AA	AA	dd	Ad	AA	Ad	AA	AA	Ad	Ad	Ad	Ad
chr1D	394601501	394606000	4500	AA	AA	Ad	AA	Ad	AA	AA	AA	AA	AA	AA	AA	Ad	AA	AA	AA	AA	AA	AA	AA	AA	AA	Ad	AA	AA	AA	AA	AA	AA	AA	AA	AA	AA	AA	AA	Ad	dd	Ad	Ad	Ad	AA	Ad	Ad	Ad	Ad	Ad
chr1D	394679001	394685000	6000	AA	AA	AA	AA	dd	Ad	AA	AA	AA	AA	AA	AA	AA	AA	AA	AA	AA	AA	AA	AA	AA	AA	AA	AA	AA	AA	AA	AA	AA	AA	AA	AA	AA	AA	AA	Ad	Ad	Ad	Ad	Ad	AA	Ad	Ad	Ad	Ad	Ad
chr1D	394771501	394778000	6500	AA	Ad	Ad	AA	AA	AA	Ad	AA	AA	AA	AA	AA	AA	AA	AB	AA	AA	AA	AA	AB	AA	Ad	AA	Ad	AA	AA	AA	Ad	AA	AA	AA	AA	AA	Ad	AA	Ad	dd	Ad	Ad	Ad	AA	AA	Ad	AA	Ad	AA
chr1D	394786001	394791000	5000	AA	AA	AA	AA	AA	AA	AA	dd	AA	AA	AA	AA	AA	AA	AA	AA	AA	AA	AA	AA	AA	AA	AA	AA	AA	AA	AA	AA	AA	AA	AA	AA	AA	AA	AA	AB	AA	AA	AA	AA	AA	AA	AA	AA	AA	AA
chr1D	394851501	394856500	5000	AA	AA	Ad	AA	AA	AA	AA	AA	Ad	AA	AA	AA	Ad	AA	AA	AA	Ad	AA	AA	AA	AA	AA	AA	AA	AA	AA	Ad	AA	Ad	AA	AA	AA	AA	AA	Ad	Ad	dd	Ad	Ad	Ad	Ad	Ad	Ad	Ad	Ad	Ad
chr1D	395062001	395066000	4000	AA	AA	AA	AA	AA	AA	AA	AA	AA	AA	AA	AA	AA	AA	AA	AA	AA	AA	AA	AA	AA	AA	AA	AA	AA	AA	AA	AA	AA	AA	AA	AA	AA	AA	AA	Ad	AA	AA	AA	AA	AA	AA	AA	AA	AA	AA
chr1D	395389501	395398000	8500	Ad	Ad	Ad	AA	Ad	AA	Ad	AA	AA	Ad	Ad	Ad	AA	AA	Ad	Ad	Ad	AA	Ad	AA	Ad	AA	AA	Ad	Ad	AA	AA	Ad	AA	AA	AA	AA	AA	AA	Ad	Ad	dd	Ad	Ad	Ad	Ad	Ad	Ad	Ad	Ad	Ad
chr1D	395587001	395607000	20000	AA	AA	AA	AA	AA	AB	AA	AA	AA	AA	AA	AA	AA	AA	AA	AA	AA	AA	AA	AA	AA	dd	dd	AA	AA	AA	AA	AA	AA	AA	AA	AA	AA	AB	AA	AA	AA	AA	AA	AA	AA	AA	AA	AA	AA	AA
chr1D	395663001	395667000	4000	AA	Ad	Ad	AA	AA	AA	AA	AA	AA	Ad	AA	AA	Ad	AA	AA	AA	AA	AA	AA	AA	AA	AA	AA	AA	AA	AA	AA	AA	AA	Ad	AA	AA	AA	Ad	AA	Ad	dd	AA	AA	AA	AA	Ad	Ad	AA	AA	AA
chr1D	395861001	395871000	10000	AA	AA	AA	AA	AA	AA	AA	AA	AA	AA	AA	AA	AA	AA	AA	AA	AA	AA	AA	AA	AA	AA	AA	AA	AA	AA	AA	AA	AA	AA	AA	AA	AA	AA	AA	AB	dd	AA	AA	AA	AA	AA	AA	AA	AA	AA
chr1D	395915001	395921500	6500	AA	AA	AA	AA	AA	Ad	AA	AA	AA	AA	AA	AA	AA	AA	AA	AA	AA	AA	AA	Ad	AA	Ad	Ad	AA	AA	AA	AA	Ad	AA	AA	AA	AA	AA	AA	AA	AA	dd	Ad	Ad	AA	AA	AA	AA	AA	Ad	AA
chr1D	396044001	396052000	8000	AA	AA	AA	AA	AA	AA	AA	AA	AA	AA	AA	AA	AA	AA	AA	AA	AA	AA	AA	Ad	AA	AA	AA	AA	AA	AA	AA	AA	AA	AA	AA	AA	AA	AA	AA	AA	dd	AA	AA	Ad	AA	AA	AA	AA	AA	AA
chr1D	396067001	396071000	4000	AA	AA	AA	AA	AA	AA	AA	AA	AA	AA	AA	AA	AA	AA	AA	AA	AA	AA	AA	AA	AA	AA	AA	AA	AA	AA	AA	AA	AA	AA	AA	AA	AA	AA	AA	AA	Ad	AA	AA	AA	AA	AA	AA	AA	AA	AA
chr1D	396253001	396257500	4500	AA	AA	AA	AB	AA	AA	AA	AA	AA	AA	AB	AB	AA	AA	AA	AA	AA	AA	AA	AA	AB	AA	AB	AA	AA	AB	AA	AA	AA	AB	AA	AB	AA	AA	AA	AA	dd	AA	AA	AA	AA	AA	AB	AA	AA	AA
chr1D	396253001	396265000	12000	AA	AA	AA	AA	AA	AA	AA	AA	AA	AA	AA	AA	AA	AA	AA	AA	AA	AA	AA	AA	AA	AA	AA	AA	AA	AA	AA	AA	AA	AA	AA	AA	AA	AA	AA	AA	dd	AA	AA	AA	AA	AA	AA	AA	AA	AA
chr1D	396316001	397050000	734000	AA	AA	AA	AA	AA	AA	AA	AA	AA	AA	AA	AA	AA	AA	AA	AA	AA	AA	AA	AA	AA	AA	AA	AA	AA	AA	AA	AA	AA	AA	AA	AA	AA	AA	AA	AA	Ad	AA	AA	AA	AA	AA	AA	AA	AA	AA
chr1D	397190501	397196500	6000	AA	AA	AA	AA	AA	AA	AA	AA	AA	AA	Ad	AA	Ad	AA	AA	AA	AA	AA	AA	AA	AA	AA	AA	AA	AA	AA	AA	AA	AA	AA	Ad	AA	AA	dd	AA	Ad	AA	Ad	Ad	Ad	AA	Ad	AA	AA	AA	Ad
chr1D	397730001	397734000	4000	AB	AA	AB	AA	AA	AA	AA	AB	AA	AA	AA	AB	AA	AB	AB	AA	AA	AA	AA	AA	AA	AA	AA	AA	dd	AA	AA	AB	AA	AB	AA	AA	AA	AA	AA	Ad	AA	AB	AA	AA	AA	AA	AA	AA	AB	AA
chr1D	398371001	398377000	6000	AA	AA	AA	AA	AA	AA	AA	AA	AA	Ad	AA	AA	AA	AA	AA	AA	AA	AA	AA	AA	AA	AA	AA	AA	AA	AA	AA	AB	AA	AA	AA	AA	AA	AA	AA	AA	dd	AA	AA	AA	AA	AA	AA	AA	AA	AA
chr1D	398386501	398390500	4000	Ad	Ad	Ad	Ad	Ad	Ad	AA	Ad	Ad	Ad	Ad	Ad	Ad	Ad	Ad	Ad	Ad	Ad	Ad	Ad	Ad	Ad	Ad	Ad	Ad	Ad	Ad	Ad	Ad	Ad	AA	AA	Ad	Ad	Ad	Ad	Ad	Ad	Ad	Ad	Ad	Ad	Ad	Ad	Ad	dd
chr1D	399147501	399151500	4000	AA	AA	AA	AA	AA	AA	AA	AA	AA	AA	AA	AA	AA	AA	AA	AA	AA	AA	AA	Ad	AA	Ad	AA	AA	AA	AA	AA	AB	AA	AA	AA	AA	AA	AA	AA	Ad	AA	AB	AA	Ad	AA	AA	AA	AA	AA	AA
chr1D	399281501	399295000	13500	AA	AA	AA	AA	AA	AA	AA	AA	AA	AA	AA	AA	AA	AB	AA	AA	AA	AA	AA	AA	AA	AA	AB	AA	AA	AA	AA	AA	AB	AB	AA	AA	AA	AA	AA	Ad	dd	AA	AA	Ad	AA	AA	AA	AA	AA	AA
chr1D	399484001	399491000	7000	AA	AA	AA	AA	AA	AA	AA	AA	AA	AA	AA	AA	AA	Ad	AA	AA	AA	AA	AA	AA	AA	AA	AA	AA	Ad	AA	AA	AB	AA	AA	AA	AA	AA	AB	AA	dd	dd	AA	Ad	Ad	AA	Ad	AA	Ad	AA	Ad
chr1D	400091501	400100000	8500	AA	AA	AA	AA	AA	AA	AA	AA	AA	AA	AA	AA	AA	dd	AA	AA	AA	AA	AA	AA	AA	AA	AA	AA	AA	AA	AA	AA	AA	AA	AA	AA	AA	AA	AA	AA	AA	AA	AA	AA	AA	AA	AA	AA	AA	AA
chr1D	400252001	400256000	4000	AA	AA	AA	AA	AB	AA	AA	AA	AA	AA	AA	AA	AA	AB	AA	AA	AA	AA	AA	AA	AA	AA	AB	AA	AB	AB	AA	AA	AA	AA	AA	AA	AA	AA	AA	AA	AA	AA	AB	AA	AA	Ad	AA	AA	Ad	AB
chr1D	401079001	401085000	6000	AA	Ad	Ad	Ad	AA	AA	Ad	Ad	AA	AA	AA	AA	AA	Ad	Ad	AA	Ad	Ad	AA	Ad	Ad	AA	AA	AA	AA	Ad	AA	AA	AA	AA	Ad	AA	AA	Ad	AA	AA	Ad	Ad	Ad	AA	Ad	Ad	Ad	Ad	Ad	Ad
chr1D	401114001	401120000	6000	AA	AA	Ad	AA	AA	AA	AA	AA	AA	AA	AA	AA	AA	AA	AA	AA	AA	AA	AA	AA	AA	Ad	AA	AA	AA	AA	AA	AA	AA	AA	AA	AA	AA	AA	AB	AA	Ad	AA	AA	AA	Ad	AA	AA	Ad	AA	AA
chr1D	401143501	401150500	7000	AA	AA	AA	AA	AA	AA	AA	AA	AA	AA	AA	AA	AA	AA	AA	AA	AA	AA	AA	AA	AA	AA	AA	AA	AA	AA	AA	AA	AA	AA	AA	AB	AA	AA	AA	AA	AB	AA	AA	AA	AA	AA	AA	AA	AA	AA
chr1D	401359501	401435500	76000	AA	AA	AA	AA	AA	AA	AA	AA	AA	AA	AA	AA	AA	AA	AA	AA	AA	AA	AA	AA	AA	AA	AA	AA	AA	AA	AA	AA	AA	AA	AA	AA	AA	AA	AA	dd	AA	AA	AA	AA	AA	AA	AA	AA	AA	AA
chr1D	401575001	401579500	4500	Ad	AA	AA	AA	AA	Ad	AA	AA	Ad	AA	AA	AA	AA	AA	AA	AA	AA	AA	AA	AA	AA	AA	AA	AA	Ad	AA	AA	dd	AA	AA	AA	AA	AA	AA	AB	AA	AA	AA	AA	AA	AB	Ad	AA	AA	Ad	AB
chr1D	402097001	402101500	4500	AA	AA	AA	AA	AA	AA	AA	AA	AA	AA	AA	Ad	AA	AA	Ad	AA	AA	AA	AA	AA	AA	AA	AA	AA	AA	AA	AA	AA	AA	AA	AA	AA	AA	AB	Ad	Ad	Ad	Ad	Ad	AA	Ad	AA	Ad	Ad	AA	Ad
chr1D	402379501	402386500	7000	AA	AB	AA	AA	AA	AA	AA	AA	AA	AA	AA	AB	AB	AA	AA	AA	AA	AA	AA	AA	AB	AA	AA	AB	AA	AA	AA	AA	AA	AA	AA	AA	AA	AA	AB	dd	AA	AA	AA	AA	AA	AA	AA	AA	AA	AA
chr1D	402622001	402628000	6000	AA	AA	AA	AA	AA	AA	AA	AA	AA	AA	AA	AA	AA	AA	AA	AA	AA	AA	AA	AA	AA	AA	AA	AA	AA	AA	AA	AA	AA	AA	AA	AA	AA	AA	Ad	dd	Ad	Ad	Ad	AA	Ad	AA	Ad	Ad	AA	Ad
chr1D	402651001	402656000	5000	AA	AA	Ad	AA	AA	Ad	AA	AA	AA	AA	AA	AA	AA	AA	AA	AA	AA	AA	AA	Ad	AA	AA	AA	AA	AA	AA	AA	Ad	AA	AA	AA	AA	AA	Ad	Ad	dd	AA	Ad	Ad	AA	Ad	AA	AA	AA	AA	Ad
chr1D	402658501	402663500	5000	Ad	AA	Ad	Ad	AA	Ad	Ad	Ad	Ad	AA	AA	Ad	AA	Ad	AA	Ad	Ad	AA	Ad	Ad	Ad	AA	AA	AA	AA	AA	AA	Ad	Ad	Ad	AA	AA	Ad	AA	Ad	dd	Ad	Ad	Ad	AA	Ad	Ad	Ad	Ad	AA	Ad
chr1D	402668001	402673500	5500	AA	AA	AA	AA	AA	AA	AA	AA	AA	AA	AA	AA	AA	AA	AA	AA	AA	AA	AA	AB	AA	AA	AA	AA	dd	AA	AA	AA	AA	AA	AB	AA	AA	AA	AA	AA	AB	AA	AB	AA	AA	AA	AA	AA	AA	AA
chr1D	402848501	402852500	4000	AA	AA	AB	AA	AA	AA	AA	dd	AA	AA	AA	AA	AB	AB	AA	AB	AA	AA	AA	AA	AA	AA	AA	AA	AA	AA	AB	AA	AA	AA	AA	AA	AA	AA	Ad	AA	AA	AA	AA	AA	AA	AA	AA	AA	AB	AA
chr1D	403589001	403594000	5000	AA	AA	AA	AB	AB	AA	AA	AA	AA	AA	AA	AA	AA	AA	AA	AA	AA	AA	AA	AA	AA	AA	AA	AA	AA	AA	AA	AA	AA	AB	AA	AA	AA	AA	AA	AA	AA	AA	AA	AA	AA	AB	AA	AA	AA	Ad
chr1D	403998501	404011000	12500	AA	BB	AA	dd	AA	AA	AA	AA	AA	AA	AA	AA	AA	AA	AA	AA	AA	dd	AA	AA	AA	AA	AA	AA	AA	AA	AA	AA	AA	AA	AA	AA	AA	AB	Ad	AA	AA	AA	AA	AA	AA	AA	AA	AA	AA	AA
chr1D	404108501	404114500	6000	AA	dd	Ad	AA	AA	dd	AA	AA	AA	AA	AA	Ad	AA	AA	AA	AA	AA	AA	AA	AA	AA	AA	AA	AA	AA	AA	AA	AA	AA	Ad	AA	AA	AA	AA	AA	AA	AA	Ad	AA	AA	AA	Ad	AA	AA	Ad	AA
chr1D	404336001	404342000	6000	AA	AA	AA	AA	AA	dd	AA	AA	AA	AA	AA	AA	AA	Ad	AA	Ad	AA	AA	AA	AA	AA	AA	AA	AA	AA	AA	AA	AA	AA	AA	AA	AA	AA	AA	Ad	dd	Ad	AA	Ad	AA	AA	AA	AA	Ad	Ad	Ad
chr1D	404401001	404408500	7500	AA	AA	AA	AA	AA	dd	AA	AA	AA	AB	AA	AA	AA	AA	AA	AA	AA	AA	AA	AA	AA	AA	AA	AA	AA	dd	Ad	AA	AA	AA	AA	AA	AA	AA	AA	AA	AB	AA	AA	AA	AA	AA	AA	AA	AA	AA
chr1D	404851001	404855000	4000	AA	AA	AB	AA	AA	dd	AA	AA	AA	AB	AA	AA	AB	AB	AA	AB	AA	AA	AA	AA	AB	AA	AA	AA	AA	AA	AA	AB	AA	AA	AA	AA	AB	AA	AA	AA	AA	AA	AA	AA	AA	AA	AA	AA	AA	AB
chr1D	404949001	404953500	4500	AB	AA	AB	AA	AB	AB	AA	AB	AB	AA	AB	AB	AB	AB	AA	AA	AB	AB	AB	AA	AB	AA	AA	AB	AB	AB	AA	AA	AA	AA	dd	AB	AB	dd	AA	AA	AA	dd	AB	AA	AA	dd	AA	AA	AA	AA
chr1D	404956501	404961000	4500	AA	AA	AA	Ad	AA	AA	AA	AA	AA	AA	AA	AA	AA	AA	AA	AA	AA	AA	AA	AA	AA	Ad	Ad	AA	AA	AA	AA	AA	AA	Ad	dd	AA	AA	dd	AA	AA	AA	dd	AA	AA	AA	dd	AA	AA	AA	AA
chr1D	405412501	405418000	5500	AA	AB	AA	AA	AA	AA	AB	AA	AA	AA	AA	AA	AA	AA	AA	AA	AA	AA	AA	AA	AA	AA	AA	AA	dd	AA	AA	AA	AA	AA	AA	AA	AA	AA	AA	AB	AA	AA	AA	AA	AA	AA	AA	AA	AA	AA
chr1D	405850501	405867000	16500	AA	AA	AA	AA	AA	AA	AA	AA	AA	AA	AA	AA	AA	AA	AA	AA	AA	AA	AA	AA	AA	AA	AA	AA	AA	AA	AA	AA	AA	AA	AA	AA	AA	AA	AA	AA	AA	AA	AA	AA	AA	AA	AA	AA	AA	AA
chr1D	406036501	406041000	4500	AA	AB	AA	AA	AA	AA	AA	AA	AA	AA	AA	AA	AA	AA	AA	AA	AA	AA	AA	AA	AA	AA	AA	AA	Ad	AA	AB	AA	AA	AA	AA	AA	AA	AA	Ad	AA	AB	AA	Ad	AA	AA	AA	AA	AA	AA	AA
chr1D	406049001	406055000	6000	AA	AA	AA	AA	AA	AA	AA	AA	AA	AA	AA	AA	AA	AA	AA	AA	AA	AA	AA	AA	AA	AA	AA	AA	AA	AA	AA	AA	AA	AA	AA	AA	AB	AA	AA	AA	AA	AA	AA	AA	AA	AA	AA	AA	AA	AA
chr1D	406057501	406063500	6000	AA	AA	AA	AA	AA	AA	AA	Ad	AA	AA	AA	AA	AA	AA	AA	AA	AA	AA	AA	AB	AA	AA	AA	AA	AA	AA	AA	AA	AA	AA	AA	AA	AA	AA	AA	AA	AA	AA	AA	AA	AA	AA	AA	Ad	AA	AA
chr1D	406119001	406124000	5000	Ad	AB	AA	AA	AA	Ad	AA	AA	Ad	AB	AA	AA	Ad	AA	AA	AA	AA	Ad	AA	AA	AA	AA	AA	AA	AA	AA	AA	AA	AA	AA	AA	AA	AA	AA	AA	AA	AA	Ad	Ad	Ad	Ad	AA	Ad	Ad	Ad	Ad
chr1D	406157501	406162000	4500	AA	AA	AA	AA	AA	AA	AA	AA	AA	AA	AA	AA	AA	AA	AA	AA	AA	AA	AA	AA	AA	AA	AA	AA	AA	AA	AA	AA	AA	AB	AA	AA	AA	AA	AA	AA	Ad	AA	AA	AA	Ad	AA	AA	Ad	Ad	AA
chr1D	406232001	406238500	6500	AA	AA	AA	AA	AA	AA	AA	AA	AA	AA	AA	AA	AA	AA	AA	AA	AA	AA	AA	AA	AA	AA	AA	AA	AA	AB	AB	AA	AA	AA	AA	AA	AA	AA	AA	AA	AA	AA	AA	AA	AA	AA	AA	AA	AA	AA
chr1D	406285001	406289000	4000	AA	AA	AA	AA	AA	dd	AA	AA	AA	AA	AA	AA	AA	AA	AA	AA	AA	AA	AA	AA	AA	AA	Ad	AA	AA	AA	AA	AA	AA	AA	AA	AA	AA	AA	AA	AA	AA	AA	AA	AA	AA	AA	AA	AA	AA	AA
chr1D	406338501	406347500	9000	AA	AA	AA	AA	AB	AA	AA	AA	AA	AA	AA	AA	AA	AA	AA	AA	AA	AA	AA	AA	AA	AA	AA	AA	AA	AA	AA	AA	AA	AA	AA	AA	AA	AA	AA	AA	AA	AA	AA	AA	AA	AA	AA	AA	AA	AA
chr1D	406353501	406358000	4500	AA	AA	AA	AA	AA	AA	AA	AA	AA	AA	AA	AB	AA	AA	AA	AA	AA	AA	AA	AB	AA	AA	AB	AA	AA	AA	AB	AB	AA	AA	AA	AA	AA	AB	Ad	AA	AA	AA	AA	AA	AA	AA	AA	AA	AA	AA
chr1D	406500001	406505000	5000	AA	AA	AA	AA	AA	AA	AA	AA	AA	AA	AA	AA	AA	Ad	AA	AA	AA	AA	AA	AA	AA	AA	AA	AA	AA	AA	AA	AA	AA	AA	AA	AA	AA	AA	AA	AA	Ad	Ad	AA	AA	AA	AA	Ad	AA	Ad	AA
chr1D	406524001	406530500	6500	AA	AA	AA	AA	AA	AA	AA	AA	AA	AA	Ad	AA	AA	AA	AA	AA	AA	AA	AA	AA	AA	AA	AA	AA	AB	AA	AA	AA	AA	AA	AA	AA	AA	AA	AA	AA	Ad	Ad	AA	AA	AA	AA	AA	Ad	Ad	Ad
chr1D	406588501	406593500	5000	AA	AA	AA	AA	AA	AA	AA	AA	AA	AA	AA	AA	AA	AA	AA	AA	Ad	AA	AA	AA	AA	AA	AA	AA	AA	AA	AB	AA	AA	AA	AA	AA	AA	AA	Ad	AA	AA	AA	Ad	AA	Ad	AA	AA	Ad	Ad	AA
chr1D	406849001	406856000	7000	AA	AA	AA	AA	AA	AA	AA	AA	AA	AB	AA	AA	AA	AA	AA	AA	AA	AA	AA	AA	AA	AA	AA	AA	AA	AA	AA	AA	AA	AA	AA	AA	AA	AA	AA	AA	AA	AA	AA	AA	AA	AA	AA	AA	AA	AA
chr1D	406962501	406966500	4000	AA	AA	AA	AA	AA	AA	AA	AA	AA	AA	AA	AA	AA	AA	AA	Ad	AA	AA	Ad	AA	AA	AA	AA	AA	AA	AA	AA	AA	Ad	AA	AA	AA	AA	AA	AA	AA	Ad	Ad	Ad	AA	Ad	AA	Ad	AA	AA	Ad
chr1D	407024501	407031000	6500	AA	AA	AA	AA	AA	AB	AA	AA	AA	AA	AA	AA	AA	AA	AA	AA	AA	AA	AA	AA	AA	AA	AA	AB	AA	AA	AA	AA	AA	AA	AA	AA	AA	AA	Ad	AA	AA	AA	AA	AA	AA	Ad	AA	AA	AA	Ad
chr1D	407036501	407043500	7000	AA	AA	AA	AA	AA	AA	AA	AA	AA	AA	AA	AA	AA	AA	AA	AA	AA	AA	AA	AA	AA	AA	BB	AA	AA	AA	AA	AA	AA	AB	AA	AA	AA	AA	AA	AA	AA	AA	AA	AA	AA	AA	AA	AA	AA	AA
chr1D	407081001	407094000	13000	AA	AA	AA	AA	AA	AA	AA	AA	AA	AA	AA	AA	AA	AA	AA	AA	AA	AA	AA	AA	AA	AA	AA	AA	AA	AA	AB	AA	AA	AA	AA	AA	AA	AA	Ad	AA	AB	AA	Ad	AA	AA	AA	AA	AA	AA	AA
chr1D	407089501	407094000	4500	AA	AA	AA	AA	AA	AA	AA	AA	AA	AA	AA	AA	AA	AB	AA	AA	AA	AA	AA	AA	AA	AA	AA	AA	AA	AA	AB	AA	AA	AA	AA	AA	AA	AA	Ad	AA	AA	AA	Ad	AA	AA	AA	AA	AA	AA	AA
chr1D	407102501	407107500	5000	AA	AA	AA	AA	AA	AA	AA	AA	AA	AA	AA	AA	AA	AA	AA	AA	AB	AA	AA	AA	AA	AA	AA	AA	AA	AA	AA	AA	AA	AA	AB	AA	AB	AA	AA	AA	AA	AA	AA	AA	AA	AB	AA	AA	AA	AA
chr1D	407191501	407199000	7500	AA	AA	AA	AA	AA	AA	AA	AA	AA	AA	Ad	AA	AA	AA	AA	AA	AA	AA	AA	AA	AA	AA	AA	AA	AA	AA	AA	AA	AA	AA	AA	AA	AA	AA	Ad	AA	AA	AA	Ad	AA	Ad	AA	Ad	Ad	AA	Ad
chr1D	407236001	407726000	490000	AA	AA	AA	AA	AA	AA	AA	AA	AA	AA	AA	AA	AA	AA	AA	AA	AA	AA	AA	AA	AA	AA	AA	AA	AA	AA	AA	AA	AA	AA	AA	AA	AA	AA	AA	AA	AA	AA	AA	AA	AA	AA	AA	AA	AA	AA
chr1D	407848501	407861000	12500	dd	AA	AA	AA	AA	AA	AA	dd	AA	Ad	AA	dd	dd	AA	dd	dd	dd	AA	AA	AA	AA	AA	AA	AA	AA	AA	AA	AA	AA	AA	AA	dd	AA	AA	dd	AA	dd	AA	AA	AA	dd	AA	dd	AA	dd	dd
chr1D	408017501	408025000	7500	dd	Ad	AA	AA	AA	Ad	AA	dd	AA	dd	Ad	dd	dd	AA	dd	dd	dd	AA	AA	AA	AA	Ad	Ad	AA	Ad	Ad	AA	AA	AA	AA	Ad	dd	AA	Ad	dd	AA	dd	AA	Ad	AA	dd	AA	dd	AA	dd	dd
chr1D	408181501	408188500	7000	dd	Ad	AA	Ad	AA	AA	AA	Ad	AA	Ad	AA	dd	dd	AA	dd	dd	dd	AA	AB	AA	AA	AA	AA	AA	AA	AA	Ad	AA	AA	AA	AA	dd	AA	AA	Ad	AA	dd	AA	AA	AA	dd	AB	dd	AA	dd	dd
chr1D	408185501	408190000	4500	Ad	Ad	AA	Ad	AA	AA	AA	Ad	AA	Ad	AA	dd	Ad	AA	dd	Ad	dd	AA	AA	AA	AA	AA	Ad	AA	AA	AA	Ad	AA	AA	AA	AA	Ad	AA	AA	dd	AA	Ad	AA	AA	AA	Ad	AA	dd	AA	dd	Ad
chr1D	408270501	408274500	4000	dd	AB	AA	AA	AA	AA	AA	dd	AA	Ad	AA	dd	dd	AA	Ad	Ad	dd	AA	AA	AA	AA	AA	AA	AA	AA	AA	Ad	AA	AA	AA	AA	dd	AA	AA	dd	AB	dd	Ad	AA	AA	dd	Ad	dd	Ad	dd	dd
chr1D	408274501	408292500	18000	dd	AA	AA	AA	AA	AA	AA	dd	AA	Ad	AA	dd	dd	AA	dd	dd	dd	AA	AA	AA	AA	AA	AA	AA	AA	AA	AA	AA	AA	AA	AA	dd	AA	AA	dd	AA	dd	AA	AA	AA	dd	AA	dd	AA	dd	dd
chr1D	408285501	408292500	7000	dd	AA	AA	AA	AA	AA	AA	dd	AA	Ad	AA	dd	dd	AA	dd	dd	dd	AA	AA	AA	AA	AA	AA	AA	AA	AA	AA	AA	AA	AA	AA	dd	AA	AA	dd	AA	dd	AA	AA	AA	dd	AA	dd	AA	dd	dd
chr1D	408296501	408302500	6000	dd	AA	AA	AA	AA	AA	AA	dd	AA	Ad	AA	dd	dd	AA	dd	dd	dd	AA	AA	AA	AA	AA	AA	AA	AA	AA	Ad	AA	AA	AA	AA	dd	AA	AA	dd	AA	dd	AA	AA	AA	dd	AA	dd	AA	dd	dd
chr1D	408473501	408478000	4500	dd	AA	AA	Ad	Ad	AA	AA	dd	Ad	Ad	Ad	dd	dd	Ad	dd	dd	dd	Ad	Ad	AA	AA	AA	AA	AA	AA	AA	Ad	AA	AA	Ad	AA	dd	AA	Ad	dd	AA	dd	Ad	Ad	AA	dd	Ad	dd	Ad	dd	dd
chr1D	408480501	408485000	4500	dd	AA	AA	AA	Ad	AA	AA	dd	Ad	Ad	AA	dd	dd	AA	dd	dd	dd	AA	AA	Ad	AA	AA	AA	AA	Ad	AA	AA	Ad	Ad	AA	AA	dd	AA	Ad	dd	AA	dd	Ad	Ad	AA	dd	AA	dd	Ad	dd	dd
chr1D	408481501	408490000	8500	dd	AA	AA	AA	AA	AA	AA	dd	AA	Ad	AA	dd	dd	AA	dd	dd	dd	AA	AA	AA	AA	AA	AA	AA	AA	AA	AA	AA	AA	AA	AA	dd	AA	AA	dd	AA	dd	AA	Ad	AA	dd	AA	dd	Ad	dd	dd
chr1D	408492501	408496500	4000	dd	AA	AA	AA	AB	AA	AA	dd	AA	Ad	AA	dd	dd	AA	dd	dd	dd	AA	AA	AA	AA	AA	AA	AA	AA	AA	AA	AA	AA	AA	AA	dd	AA	AA	dd	AA	dd	AA	AA	AA	dd	AA	dd	AA	dd	dd
chr1D	408498001	408504500	6500	dd	AA	AA	AA	AA	AA	AA	dd	AB	Ad	AA	dd	dd	AA	dd	dd	dd	AA	AA	AA	AA	AA	AA	AA	AA	AA	Ad	AA	AA	AA	AA	dd	AA	AA	dd	AA	dd	AA	AA	AA	dd	AA	dd	AA	dd	dd
chr1D	408756001	408760000	4000	dd	AA	AA	AA	AA	AA	AA	dd	AA	Ad	Ad	dd	dd	AB	dd	dd	dd	AA	AA	AA	AA	AA	AA	AA	AB	AA	Ad	AA	AA	AA	AA	dd	AA	Ad	dd	AA	dd	Ad	Ad	AA	dd	AA	dd	Ad	dd	dd
chr1D	408777001	408781000	4000	Ad	AA	AA	AA	AA	AA	AA	Ad	Ad	Ad	AA	Ad	Ad	Ad	Ad	Ad	Ad	AA	AA	AA	AA	AA	AA	AA	AA	AA	Ad	Ad	AA	AA	AA	dd	AA	AA	dd	AA	dd	AA	AA	AA	dd	AA	dd	Ad	Ad	dd
chr1D	408817501	408821500	4000	dd	Ad	Ad	Ad	Ad	Ad	Ad	dd	Ad	dd	Ad	dd	dd	Ad	dd	dd	dd	Ad	Ad	Ad	Ad	Ad	Ad	Ad	Ad	Ad	Ad	Ad	Ad	Ad	AA	dd	Ad	Ad	dd	Ad	dd	Ad	Ad	Ad	dd	Ad	dd	Ad	dd	dd
chr1D	408856001	408861500	5500	Ad	AA	AA	AA	AA	AB	AA	Ad	AA	Ad	AA	Ad	Ad	AB	Ad	Ad	Ad	AA	AA	AA	AB	AA	AA	AA	AB	AA	AA	AA	AA	AA	AA	Ad	AA	AA	dd	AA	dd	AA	AA	AA	dd	AA	dd	AA	Ad	dd
chr1D	409007501	409021000	13500	Ad	AA	AA	AA	AA	AA	AA	AA	Ad	AA	AA	AA	AA	dd	AA	AA	AA	AA	AA	AA	AA	AA	AA	AA	AA	AA	AA	AA	AA	AA	AA	AA	dd	AA	AA	AA	AA	AA	AA	AA	AA	AA	AA	AA	AA	AA
chr1D	409025501	409030500	5000	dd	AA	AA	AA	Ad	Ad	AA	dd	AA	Ad	AA	Ad	dd	AA	Ad	Ad	dd	AA	AA	AA	Ad	Ad	AA	AA	AA	AA	Ad	Ad	AA	AA	AA	Ad	AA	AA	dd	AA	dd	Ad	Ad	AA	dd	AA	dd	Ad	dd	Ad
chr1D	409089001	409093000	4000	AA	AA	AA	AA	AA	AA	AA	AA	AA	AA	AA	AA	Ad	AA	AA	AA	AA	AB	AA	AA	AA	AA	AA	AA	AA	AA	AA	AA	AA	AB	AA	Ad	AA	AA	Ad	AA	Ad	AA	AA	AA	Ad	AB	Ad	AA	Ad	dd
chr1D	409128501	409138000	9500	dd	AA	AA	AA	AA	AA	AB	dd	AA	Ad	AA	dd	dd	AA	dd	dd	dd	AA	AA	AA	AA	AA	AA	AA	AA	AA	AA	AA	AA	AA	AA	dd	AA	AA	dd	AA	dd	AA	AA	AA	dd	AA	dd	AA	dd	dd
chr1D	409160001	409167000	7000	AA	AA	AA	AA	AA	AA	AA	AA	AA	AA	AA	AA	AA	AA	AA	AA	AA	AA	AA	AA	AA	AA	AA	AA	AA	AA	AA	AA	AA	AA	AA	AA	AA	AA	Ad	AA	AA	AA	AA	AA	AA	AA	Ad	AA	Ad	AA
chr1D	409269001	409274000	5000	dd	AB	AA	AA	AA	AA	AA	dd	AA	Ad	AA	dd	dd	AA	dd	dd	dd	AA	AA	AA	AA	AA	AA	AA	AA	AA	Ad	AB	AA	AA	AA	dd	AA	Ad	dd	AA	dd	AA	Ad	AA	dd	AA	dd	Ad	dd	dd
chr1D	409406001	409415500	9500	dd	AA	AA	AA	AA	AA	AA	dd	AA	Ad	AA	dd	dd	AA	dd	dd	dd	AA	AA	AA	AA	AA	AA	AA	AA	AA	AA	AA	AA	AA	AA	dd	AA	AA	dd	AA	dd	AA	AA	AA	dd	AA	dd	AA	dd	dd
chr1D	409564001	409568000	4000	dd	AA	AA	Ad	AA	AA	AA	dd	AA	Ad	AA	dd	dd	AA	dd	dd	dd	AA	AA	AA	AA	AA	AA	AA	AA	AA	Ad	AA	AA	AA	AA	dd	AA	AA	dd	AA	dd	AA	Ad	AA	dd	Ad	dd	Ad	dd	dd
chr1D	409591501	409596000	4500	Ad	AA	AA	AA	AA	AA	Ad	Ad	AA	Ad	AA	Ad	Ad	AA	Ad	Ad	Ad	AA	Ad	AA	Ad	Ad	AB	AA	AA	Ad	Ad	AA	AA	AA	AA	Ad	Ad	AA	Ad	AA	Ad	AA	AA	AA	Ad	AA	Ad	AA	dd	dd
chr1D	409599001	409603500	4500	Ad	AA	AA	AA	AA	AA	AA	Ad	AA	Ad	AA	Ad	Ad	AA	dd	Ad	Ad	AA	AA	AA	AA	AA	AA	AA	AA	Ad	Ad	AA	AA	AA	Ad	Ad	AA	AA	dd	AA	Ad	AA	AA	AA	dd	AA	dd	AA	Ad	dd
chr1D	409607001	409619500	12500	Ad	AA	AA	AA	AA	AA	AA	Ad	AA	Ad	AA	Ad	Ad	AA	Ad	Ad	Ad	AA	AA	AA	AA	AA	AA	AA	AA	AA	AA	AA	AA	AA	AA	Ad	AA	AA	dd	AA	dd	AA	AA	AA	dd	AA	dd	AA	Ad	dd
chr1D	409627001	409632000	5000	Ad	AA	AA	AB	AA	AA	AB	Ad	AA	Ad	AA	Ad	Ad	AA	Ad	Ad	Ad	AA	AA	AA	AA	AA	AA	AA	AA	AA	Ad	AA	AA	AA	AA	Ad	AA	AA	Ad	AA	Ad	AA	AA	AA	Ad	AA	Ad	AA	dd	dd
chr1D	409629001	409635000	6000	dd	AB	AA	AA	AA	AA	AA	dd	AA	Ad	AA	dd	Ad	AA	Ad	Ad	dd	AA	AA	AA	AA	AA	AA	AA	AA	AA	Ad	AA	AA	AA	AA	dd	AA	AA	dd	AA	dd	AA	AA	AA	Ad	AA	dd	AA	dd	dd
chr1D	409925001	409929500	4500	Ad	AA	AA	AA	AA	AA	AA	Ad	AA	AA	AA	Ad	Ad	AA	AA	Ad	Ad	AA	AA	AA	AA	AA	AA	AA	AA	AA	AA	AA	AA	AA	AA	Ad	AA	AA	Ad	AA	AA	AA	AA	AA	Ad	AA	Ad	AA	Ad	AA
chr1D	410007501	410012000	4500	Ad	AA	AA	AA	Ad	Ad	AA	AA	AA	AA	AA	Ad	AA	AA	AA	AA	AA	AA	AA	AA	AA	AA	AA	AA	dd	AA	AA	AA	AA	AA	AA	AA	AA	AA	AA	AA	AA	AA	AA	AA	Ad	AB	AA	AA	AA	AB
chr1D	410136001	410151500	15500	dd	AA	AA	AA	AA	dd	AA	dd	AA	Ad	AA	dd	dd	AA	dd	dd	dd	AA	AA	AA	AA	AA	AA	AA	AA	AA	Ad	AA	AA	AA	AA	dd	AA	AA	dd	AA	dd	AA	AA	AA	dd	AA	dd	AA	dd	dd
chr1D	410208001	410212000	4000	Ad	AB	AA	AA	AA	dd	AB	dd	AA	Ad	AA	dd	Ad	AA	Ad	dd	Ad	AA	AA	AA	AA	AA	AB	AA	AA	AA	AA	AA	AB	AA	AA	Ad	AA	AB	dd	AA	dd	AA	AA	AA	dd	AB	dd	AA	dd	dd
chr1D	410240001	410249500	9500	dd	Ad	AA	AA	AA	dd	AA	dd	Ad	Ad	AA	dd	dd	AA	dd	dd	dd	AA	AA	AA	Ad	AA	Ad	AA	AA	AA	AA	Ad	AA	Ad	Ad	dd	AA	Ad	dd	AA	dd	Ad	Ad	AA	dd	Ad	dd	Ad	dd	dd
chr1D	410266501	410271500	5000	dd	Ad	Ad	Ad	Ad	dd	AA	dd	AA	dd	Ad	dd	dd	AA	dd	dd	dd	AA	Ad	AA	Ad	Ad	AA	AA	AA	AA	Ad	Ad	Ad	Ad	AA	dd	AA	AA	dd	AA	dd	Ad	Ad	AA	dd	AA	dd	Ad	dd	dd
chr1D	410267501	410302500	35000	dd	AA	AA	AA	AA	dd	AA	dd	AA	Ad	Ad	dd	dd	AA	dd	dd	dd	AA	AA	AA	AA	AA	AA	AA	AA	AA	AA	AA	AA	AA	AA	dd	AA	AA	dd	AA	dd	AA	Ad	AA	dd	AA	dd	Ad	dd	dd
chr1D	410420501	410426000	5500	dd	AA	AB	AA	AA	dd	AA	dd	Ad	Ad	AA	dd	dd	AA	dd	dd	dd	AA	AA	AA	Ad	Ad	AA	AA	AA	AA	AB	AB	AA	Ad	AA	dd	AA	AB	dd	AB	dd	AA	Ad	AB	dd	AA	dd	Ad	dd	dd
chr1D	410428001	410432500	4500	dd	Ad	dd	dd	dd	dd	Ad	dd	dd	dd	dd	dd	dd	dd	dd	dd	dd	dd	dd	Ad	dd	dd	Ad	dd	dd	Ad	dd	dd	Ad	dd	Ad	dd	Ad	dd	dd	Ad	dd	dd	dd	dd	dd	dd	dd	dd	dd	dd
chr1D	410477001	410483000	6000	AA	AA	AA	AA	AA	AA	Ad	AA	Ad	AA	Ad	AA	Ad	AA	AA	AA	AA	Ad	Ad	AA	AA	AA	Ad	AA	AA	AA	Ad	Ad	AA	AA	Ad	AA	AA	AA	AB	AA	AB	AA	AA	AA	AA	AA	AA	AA	Ad	AA
chr1D	410552501	410586000	33500	dd	AA	AA	AA	AA	dd	AA	dd	AA	Ad	AA	dd	dd	AA	dd	dd	dd	AA	AA	AA	AA	AA	AA	AA	AA	AA	AA	AA	AA	AA	AA	dd	AA	AA	dd	AA	dd	AA	AA	AA	dd	AA	dd	AA	dd	dd
chr1D	410628001	410632500	4500	dd	AA	Ad	AA	AA	dd	Ad	dd	AA	Ad	Ad	dd	dd	Ad	dd	dd	dd	Ad	AA	Ad	AA	AA	Ad	Ad	Ad	AA	Ad	AA	AA	AA	AA	dd	Ad	AA	dd	AA	dd	Ad	Ad	AA	dd	Ad	dd	AA	dd	dd
chr1D	410651501	410656500	5000	Ad	AA	AA	AA	AA	Ad	AB	AA	AB	AA	AA	Ad	Ad	AA	Ad	AA	Ad	AA	AA	AA	AA	AA	AB	AB	AA	AA	AB	AB	AA	AB	AB	Ad	AB	AA	dd	AA	Ad	AA	Ad	AA	Ad	AA	Ad	AA	Ad	AA
chr1D	410757501	410762000	4500	dd	AA	AA	AA	AA	dd	AB	dd	AA	Ad	AB	dd	dd	AA	dd	dd	dd	AA	AA	AB	AA	AA	AA	AA	AA	AA	Ad	AA	AB	AA	AA	dd	AA	AA	dd	AA	dd	Ad	AA	AA	dd	AA	dd	AA	dd	dd
chr1D	410765001	410772500	7500	dd	AA	AA	AA	AA	dd	AA	dd	AA	Ad	Ad	dd	dd	AA	dd	dd	dd	AA	AA	AA	AB	AA	AA	AA	AA	AA	Ad	AA	AA	AB	AA	dd	AA	AA	dd	AA	dd	AA	Ad	AA	dd	AB	dd	AA	dd	dd
chr1D	410824501	410837000	12500	dd	AA	AA	AA	AA	dd	AA	dd	AA	Ad	AA	dd	dd	AA	dd	dd	dd	AA	AA	AA	AA	AA	AB	AA	AA	AA	Ad	AA	AA	AA	AA	dd	AA	AA	dd	AA	dd	AA	AA	AA	dd	AA	dd	AA	dd	dd
chr1D	410953501	410957500	4000	Ad	AA	AA	AA	AA	dd	AA	dd	AA	AA	AA	Ad	dd	AA	dd	Ad	Ad	AA	AA	AA	AA	AA	AA	AA	AA	AA	AA	AA	AA	AA	AA	Ad	AA	AA	dd	AA	Ad	AA	AA	AA	dd	AA	dd	AA	dd	dd
chr1D	410974001	410981000	7000	dd	AA	AA	AA	AA	dd	AA	dd	AA	Ad	AA	dd	dd	AA	dd	dd	dd	AA	AA	AA	AA	AA	AA	AA	AA	AA	AA	AA	AA	AA	AA	dd	AA	AA	dd	AA	dd	AA	AA	AA	dd	AA	dd	AA	dd	dd
chr1D	410980501	410986500	6000	dd	AA	AA	AA	Ad	dd	AA	dd	AA	Ad	AA	dd	dd	AA	dd	dd	dd	AA	AA	AA	dd	dd	AA	AA	AA	AA	Ad	AA	AA	AA	AA	dd	AA	AA	dd	AA	dd	AA	AA	AA	dd	AA	dd	AA	dd	dd
chr1D	410984501	410991000	6500	dd	AA	AA	AA	AA	dd	AA	dd	AA	dd	AA	dd	dd	AA	dd	dd	dd	AA	Ad	AA	AA	AA	AA	AA	AA	AA	Ad	AA	AA	AA	AA	dd	AA	AA	dd	AA	dd	AA	AB	AA	dd	AA	dd	AB	dd	dd
chr1D	410993501	410997500	4000	AA	AA	AA	AA	AA	Ad	AA	AA	AA	AA	AA	Ad	AA	AA	AA	AA	Ad	AA	AA	AA	AA	AA	AA	AA	AA	AA	AA	AA	AA	AA	AA	AA	AA	AA	AA	AA	AA	AA	AA	AA	Ad	AA	Ad	AA	Ad	AA
chr1D	411032001	411036500	4500	Ad	AA	AA	AA	AB	Ad	AA	Ad	AA	Ad	AB	Ad	Ad	AA	Ad	Ad	Ad	AA	AB	AB	AA	AB	AA	AA	AA	AB	AA	AA	AA	AA	AA	Ad	AB	AB	dd	AA	Ad	AA	AA	AA	Ad	AA	Ad	AA	Ad	dd
chr1D	411163501	411168500	5000	dd	AA	AA	AA	AA	dd	AA	dd	Ad	Ad	AA	dd	dd	AA	dd	dd	dd	AA	AA	AA	AA	AA	AA	AA	Ad	AA	Ad	AA	AA	AA	AA	dd	Ad	AA	dd	AA	dd	AA	AA	AA	dd	AA	dd	AA	dd	dd
chr1D	411264001	411268500	4500	Ad	AA	AA	AA	AA	Ad	AA	Ad	AA	Ad	AA	Ad	Ad	AA	Ad	Ad	Ad	AA	AA	AA	AA	AA	AA	AA	AA	AA	Ad	AA	AA	AA	AA	Ad	AA	AA	dd	AA	Ad	AA	AA	AA	Ad	AA	Ad	AA	dd	Ad
chr1D	411280001	411301000	21000	Ad	AA	AA	AA	AA	Ad	AA	Ad	AA	Ad	AA	Ad	Ad	AA	Ad	Ad	Ad	AA	AA	AA	AA	AA	AA	AA	AA	AA	AA	AA	AA	AA	AA	Ad	AA	AA	Ad	dd	Ad	AA	AA	AA	Ad	AA	Ad	AA	Ad	Ad
chr1D	411418001	411425000	7000	dd	AA	AA	AA	AA	dd	AA	dd	AA	dd	AA	dd	dd	AA	dd	dd	dd	AA	AA	AA	AA	AA	AA	AA	AA	AA	Ad	AA	AA	AA	AA	dd	AA	AA	dd	dd	dd	AA	AA	AA	dd	Ad	dd	AA	dd	dd
chr1D	411434501	411439000	4500	dd	AA	AA	AA	AA	dd	AA	dd	Ad	Ad	AA	dd	dd	AA	dd	dd	dd	AA	AA	AA	AA	AA	AA	AA	AA	AA	AA	AA	AA	AA	AA	dd	AA	AA	dd	AA	dd	AA	AB	AA	dd	AA	dd	AA	dd	dd
chr1D	411569001	411573500	4500	Ad	AA	AA	Ad	AA	AA	AA	Ad	dd	AA	dd	AA	Ad	Ad	AA	AA	AA	AA	dd	AA	AA	AA	AA	AA	AA	Ad	AA	dd	AA	Ad	Ad	AA	Ad	Ad	AA	AA	AA	AA	AA	AA	AA	AA	AA	AA	AA	AA
chr1D	411599001	411603500	4500	dd	M	BC	M	M	dd	BC	dd	M	AA	BC	dd	dd	M	dd	dd	dd	BB	M	M	M	M	BC	M	M	M	M	M	M	M	M	dd	M	M	dd	dd	dd	M	M	M	dd	M	dd	M	dd	dd
chr1D	411600501	411617500	17000	dd	AB	AA	AA	AA	dd	AA	dd	AA	Ad	AB	dd	dd	AB	dd	dd	dd	AA	AA	AB	AB	AB	AB	AA	AB	AA	AA	AA	AA	AB	AB	dd	AA	AB	dd	dd	dd	AA	AA	AB	dd	AA	dd	AA	dd	dd
chr1D	411631001	411651500	20500	dd	AA	AA	AA	AA	dd	AA	dd	AA	Ad	AA	dd	dd	AA	dd	dd	dd	AA	AA	AA	AA	AA	AA	AA	AA	AA	AA	AA	AA	AA	AA	dd	AA	AA	dd	dd	dd	AA	AA	AA	dd	AA	dd	AA	dd	dd
chr1D	411660001	411665000	5000	dd	AA	AA	AA	AB	dd	AA	dd	AA	Ad	AA	dd	dd	AA	dd	dd	dd	AA	AA	AA	AB	AA	AA	AA	AA	AB	AA	AA	AB	AA	AA	dd	AB	AA	dd	dd	dd	AA	Ad	AA	dd	AA	dd	Ad	dd	dd
chr1D	411668501	411675000	6500	dd	AA	AA	AA	AA	dd	AA	dd	AA	Ad	AA	dd	dd	AA	dd	dd	dd	AA	AA	AA	AA	AA	AA	AA	AA	AA	AA	AA	AA	AB	AA	dd	AA	AA	dd	dd	dd	AA	AA	AA	dd	AA	dd	AA	dd	dd
chr1D	411682501	411690500	8000	dd	AB	AB	AB	AB	dd	AB	Ad	AB	Ad	AB	dd	dd	AB	dd	Ad	dd	AA	BB	AA	AB	AB	AB	AB	AA	AB	AA	AB	AB	AB	AB	dd	AA	AB	Ad	dd	dd	AB	AB	AB	dd	AB	dd	AB	dd	Ad
chr1D	411703001	411709500	6500	dd	BB	BB	AB	AB	dd	AA	dd	BB	Ad	AB	dd	dd	BB	dd	dd	dd	Ad	BB	BB	BC	BC	BB	AB	BB	BB	AA	BC	BB	BB	BB	dd	BC	BC	dd	Ad	dd	AA	AB	AB	dd	BB	dd	AA	dd	dd
chr1D	411791501	411799000	7500	dd	AA	AA	AA	AA	dd	Ad	dd	Ad	Ad	AA	dd	dd	AA	dd	dd	dd	Ad	AA	AA	AA	AA	AA	AA	Ad	Ad	AA	AA	AA	AA	AA	dd	AA	Ad	dd	AA	dd	Ad	Ad	AA	dd	Ad	dd	AA	dd	dd
chr1D	411827001	411831500	4500	dd	AA	Ad	AA	Ad	dd	AA	dd	AA	dd	AA	dd	dd	AA	dd	dd	dd	Ad	AA	AA	AA	Ad	Ad	AA	AA	AA	Ad	AA	AA	Ad	AA	dd	AA	AA	dd	AA	dd	AA	AA	AA	dd	AA	dd	AA	dd	dd
chr1D	411858501	411864000	5500	dd	AA	AA	AA	AA	dd	AA	dd	AA	dd	AA	dd	dd	AA	dd	dd	dd	Ad	AA	AA	AA	Ad	AA	AA	AA	AA	Ad	AB	AA	AA	AA	dd	AA	AA	dd	AA	dd	Ad	AA	AA	dd	Ad	dd	AA	dd	dd
chr1D	412038501	412052500	14000	dd	AA	AA	AA	AA	dd	AA	dd	AA	Ad	AA	dd	dd	AA	dd	dd	dd	AA	AA	AA	AA	AA	AA	AA	AA	AA	Ad	AA	AA	AA	AA	dd	AA	AA	dd	dd	dd	Ad	Ad	AA	dd	AA	dd	AA	dd	dd
chr1D	412063501	412069500	6000	Ad	AA	AA	AA	AA	dd	AA	Ad	AA	Ad	AA	Ad	Ad	AA	dd	Ad	Ad	AA	AA	AA	AA	AA	AA	AA	AA	AA	AA	AA	AA	AA	AA	Ad	AA	AA	dd	Ad	dd	AA	AA	AA	dd	AA	dd	AA	dd	Ad
chr1D	412583501	412602500	19000	dd	AA	AA	AA	AA	dd	AA	AA	AA	Ad	AA	dd	dd	AA	dd	dd	dd	AA	AA	Ad	AA	AA	AA	AA	AA	AA	Ad	AA	AA	AA	AA	dd	AA	AA	dd	Ad	dd	Ad	AA	AA	dd	AA	dd	Ad	dd	dd
chr1D	412602501	412610000	7500	Ad	AA	AA	AA	AA	Ad	AA	AA	AA	Ad	AA	Ad	Ad	AA	Ad	Ad	Ad	AA	AA	AA	AA	AA	AA	AA	AA	AA	AA	AA	AA	AA	AA	Ad	AA	AA	Ad	dd	Ad	AA	AA	AA	Ad	AA	Ad	AA	Ad	Ad
chr1D	412621001	412633500	12500	dd	AA	Ad	AA	AA	dd	AA	AA	AA	Ad	AA	dd	dd	AA	dd	dd	dd	AA	AA	Ad	Ad	AA	AA	AA	AA	Ad	Ad	AA	Ad	Ad	AA	dd	AA	Ad	dd	AA	dd	Ad	Ad	AA	dd	AA	dd	Ad	dd	dd
chr1D	412643501	412658000	14500	dd	AA	AA	AA	AA	dd	AA	AA	AA	Ad	AA	dd	dd	AA	dd	dd	dd	AA	AA	AA	AA	AA	AA	AA	AA	AA	AA	AA	AA	AA	AA	dd	AA	AA	dd	AA	dd	AA	AA	AA	dd	AA	dd	AA	dd	dd
chr1D	412663501	412680000	16500	dd	AA	AA	AA	AA	dd	AA	AA	AA	Ad	AA	dd	dd	AA	dd	dd	dd	AA	AA	AA	AA	AA	AA	AA	AA	AA	Ad	AA	AA	AA	AA	dd	AA	AA	dd	AA	dd	AA	AB	AA	dd	Ad	dd	AA	dd	dd
chr1D	412760001	412774000	14000	dd	AB	BB	AB	AB	dd	AA	AA	AA	Ad	AB	dd	dd	AB	dd	dd	dd	AA	Ad	dd	AB	AB	Ad	AB	Ad	AA	Ad	Ad	BB	BB	AA	dd	AB	AB	dd	dd	dd	AB	AA	Ad	dd	AA	dd	AA	dd	dd
chr1D	412865001	412869000	4000	Ad	Ad	AA	AA	AA	Ad	Ad	Ad	Ad	Ad	Ad	Ad	Ad	AA	Ad	Ad	Ad	Ad	Ad	AA	AA	Ad	Ad	Ad	AA	Ad	AB	AA	AA	AA	AA	Ad	AA	Ad	dd	AA	Ad	Ad	Ad	AA	Ad	Ad	Ad	Ad	dd	Ad
chr1D	412916501	412923500	7000	dd	AA	AA	AA	AA	dd	AA	AA	AA	Ad	AA	dd	dd	AA	dd	dd	dd	AA	AA	Ad	AA	Ad	AA	AA	AA	AA	Ad	AA	AA	AA	AA	dd	AA	AA	dd	AA	dd	AA	AA	AA	dd	AA	dd	AA	dd	Ad
chr1D	412929001	412933000	4000	dd	AA	AA	AB	AA	dd	AA	AA	AA	Ad	AA	dd	dd	AA	dd	dd	dd	AA	AA	AA	AA	AA	AA	AA	AA	AA	Ad	AA	AA	AA	AA	dd	AA	AA	dd	AA	dd	AA	AA	AA	dd	AA	dd	AA	dd	dd
chr1D	413010501	413014500	4000	Ad	AA	AA	AA	AA	Ad	AA	AA	AA	Ad	AA	AA	Ad	AA	AA	Ad	AA	AA	AA	AA	AA	AA	AA	AA	AA	AA	Ad	AA	AA	AA	AA	Ad	AA	AA	AA	AA	Ad	AA	AA	AA	Ad	AA	Ad	AA	dd	AA
chr1D	413024501	413031000	6500	dd	AA	AA	AA	AA	dd	AA	AA	AA	Ad	AA	dd	dd	AA	dd	dd	dd	AA	AA	AA	Ad	AA	AA	AA	AA	AA	AA	AA	AA	AA	Ad	dd	AA	AA	dd	AA	dd	AA	AA	AA	dd	AA	dd	AA	dd	dd
chr1D	413034001	413038000	4000	dd	AA	AA	AA	AA	dd	AA	AA	AA	Ad	AA	dd	dd	AA	dd	dd	dd	AB	AA	AA	AA	AA	AA	dd	AA	AA	AA	AA	AA	AA	AA	dd	AA	AA	dd	AA	dd	AA	AA	AA	dd	AB	dd	AA	dd	dd
chr1D	413082001	413093500	11500	dd	AA	AA	AA	AA	dd	AA	AA	AA	Ad	AA	dd	dd	AA	dd	dd	dd	AA	AA	AA	AA	AA	AA	AA	AA	AA	AA	AA	AA	AA	AA	dd	AA	AA	dd	AA	dd	AA	AA	AA	dd	AA	dd	AA	dd	dd
chr1D	413152001	413156000	4000	AA	AA	AA	AA	AA	AA	AA	AA	AA	Ad	AA	AA	Ad	AA	Ad	AA	AA	AA	AA	dd	AA	AA	AA	AA	AA	AA	AA	AA	AA	AA	AA	AA	AA	AA	Ad	AA	Ad	AA	Ad	AA	Ad	AA	Ad	AA	Ad	Ad
chr1D	413204501	413209500	5000	dd	Ad	Ad	Ad	Ad	dd	Ad	Ad	Ad	Ad	Ad	dd	dd	Ad	dd	dd	dd	Ad	Ad	Ad	Ad	Ad	Ad	Ad	Ad	Ad	Ad	Ad	Ad	Ad	Ad	dd	Ad	Ad	dd	Ad	dd	Ad	Ad	Ad	dd	Ad	dd	Ad	dd	dd
chr1D	413337501	413344500	7000	Ad	AA	AA	AA	AA	Ad	AA	AA	AA	Ad	AA	Ad	Ad	AA	Ad	Ad	Ad	AA	AA	AA	AA	AA	AA	AA	AA	AA	AA	AA	AA	AA	AA	Ad	AA	AA	Ad	AA	dd	AA	AB	AA	Ad	AA	Ad	AA	dd	Ad
chr1D	416602001	416607500	5500	Ad	dd	dd	Ad	Ad	Ad	Ad	Ad	Ad	dd	Ad	Ad	Ad	dd	Ad	Ad	Ad	Ad	dd	dd	Ad	Ad	Ad	Ad	Ad	dd	dd	dd	dd	dd	Ad	Ad	Ad	dd	dd	Ad	dd	dd	dd	Ad	dd	dd	dd	dd	dd	dd
chr1D	416639001	416648000	9000	AA	dd	AA	AA	Ad	AA	AA	AA	AA	AA	AA	AA	AA	AA	AA	AA	AA	AA	AA	dd	AA	AA	AA	AA	AA	dd	Ad	AA	AA	AA	AA	AA	AA	dd	AA	AA	Ad	Ad	Ad	AA	Ad	Ad	Ad	Ad	Ad	AA
chr1D	416676001	416682500	6500	AA	AA	AA	AA	AA	AA	AA	AA	AA	AA	AA	AA	AA	AA	AA	AA	AA	AA	AA	AA	AA	AA	AA	AA	AA	AA	AA	AA	AA	AA	AA	AA	AA	AA	AA	dd	AA	AA	AA	AA	AA	AA	AA	AA	AA	AA
chr1D	416710001	416714000	4000	AA	dd	AA	AA	AA	Ad	AA	AA	AA	Ad	Ad	Ad	AA	AA	Ad	AA	AA	AA	AA	dd	AA	AB	AA	AA	Ad	dd	Ad	AA	AA	AA	AA	AA	Ad	dd	Ad	dd	Ad	Ad	Ad	Ad	Ad	AA	Ad	Ad	Ad	Ad
chr1D	416811001	416822500	11500	AA	dd	AA	Ad	AA	AA	AA	AA	AA	AA	AA	AA	AB	AB	AA	AA	AA	AA	AA	Ad	Ad	Ad	AB	AA	AA	Ad	AA	AA	Ad	AA	AA	Ad	AA	dd	AA	AA	AB	AB	AA	AB	AB	AB	AA	AA	AB	AB
chr1D	416859001	416867500	8500	Ad	dd	Ad	Ad	Ad	Ad	Ad	Ad	Ad	Ad	Ad	Ad	Ad	Ad	Ad	Ad	Ad	Ad	Ad	Ad	Ad	Ad	Ad	Ad	Ad	Ad	Ad	Ad	Ad	Ad	Ad	Ad	Ad	dd	Ad	Ad	Ad	Ad	Ad	Ad	Ad	Ad	Ad	Ad	Ad	Ad
chr1D	416891501	416895500	4000	AA	dd	AA	AA	AB	AA	AA	AA	AA	AA	AA	AA	AB	AB	AA	AA	AA	AA	AA	dd	AB	AA	AA	AA	AA	dd	Ad	AA	AA	AA	AA	AA	AA	dd	AA	dd	AB	AA	AA	AA	AA	AA	AA	AA	AB	AA
chr1D	417056501	417064500	8000	AA	dd	AA	AA	AA	AA	AA	AA	AA	AA	AA	AA	AA	AA	AA	AA	AA	AA	AA	dd	AA	AA	AA	AA	AA	dd	Ad	AA	AA	AA	AA	AA	AA	dd	AB	AA	AA	AA	AA	AA	AA	AA	AA	AA	AA	AB
chr1D	417242501	417251000	8500	AA	AA	AA	AA	AA	AA	AA	AA	AA	AA	AA	AA	AA	AA	AA	AA	AA	AA	AA	AA	AA	AA	AA	AA	AA	AA	AA	Ad	AA	AA	AA	AA	AA	AA	AA	AA	AA	AA	AA	AA	AA	AA	AA	AA	Ad	AB
chr1D	417274001	417282500	8500	AA	dd	AA	AA	AA	AA	AA	AA	AA	Ad	AA	AA	AA	AA	Ad	AA	AA	AA	AA	dd	AA	AA	Ad	AA	AA	dd	Ad	AA	AA	AA	AA	AA	AA	dd	Ad	dd	AA	Ad	Ad	AA	Ad	Ad	Ad	Ad	AA	Ad
chr1D	417297501	417306500	9000	Ad	dd	Ad	Ad	AA	Ad	Ad	Ad	Ad	AA	Ad	AA	AA	AA	Ad	Ad	Ad	Ad	AA	dd	Ad	Ad	Ad	Ad	Ad	dd	dd	Ad	AA	AA	Ad	Ad	Ad	dd	Ad	AA	Ad	Ad	Ad	Ad	Ad	AA	Ad	Ad	Ad	Ad
chr1D	417388001	417393000	5000	AA	dd	AA	AA	AA	AA	AA	AA	AA	AA	AA	AA	AA	AA	AA	AA	AA	AA	AA	AA	AA	AA	AA	AA	AA	AA	AA	Ad	AA	AA	AA	AA	AA	dd	AA	AA	AA	AA	AA	AA	AA	AB	AA	AA	AB	AA
chr1D	417396501	417402000	5500	AA	dd	AA	AA	AA	AA	AA	AA	AA	Ad	Ad	AA	AA	AA	AA	AA	AA	AA	AA	Ad	AA	AA	Ad	AA	AA	Ad	AA	AA	AA	AA	AA	AA	AA	dd	Ad	Ad	Ad	Ad	Ad	Ad	Ad	Ad	Ad	Ad	Ad	Ad
chr1D	417414001	417419000	5000	AA	dd	AA	AA	AA	AA	AA	AA	AA	AA	AA	AA	AA	AA	AA	AA	AA	AA	AB	AA	AA	AA	AA	AA	AB	AA	AA	AA	AA	AB	AA	AA	AA	dd	Ad	AA	Ad	AA	AA	AA	AA	AB	AA	AA	AB	AA
chr1D	417429001	417434500	5500	AB	dd	AB	AA	AA	AA	AA	AB	AA	AA	AA	AA	AB	AB	AA	AA	AB	AA	AA	AA	AB	AA	AA	AA	AB	AA	AA	AA	AA	AA	AB	AA	AA	Ad	AB	AA	AA	AA	AA	AA	AA	AA	AA	AA	Ad	AA
chr1D	417449501	417475000	25500	AA	dd	AA	AA	AA	AA	AA	AA	AA	AA	AA	AA	AA	AA	AA	AA	AA	AA	AA	AA	AA	AA	AA	AA	AA	AA	AA	AA	AA	AA	AA	AA	AA	dd	AA	AA	AA	AA	AA	AA	AA	AA	AA	AA	AA	AA
chr1D	417550501	417559500	9000	Ad	dd	Ad	Ad	Ad	Ad	Ad	Ad	Ad	Ad	AA	AA	Ad	Ad	Ad	Ad	AA	Ad	Ad	Ad	Ad	AA	Ad	Ad	Ad	Ad	Ad	Ad	Ad	Ad	Ad	AA	Ad	dd	Ad	Ad	Ad	Ad	Ad	Ad	Ad	Ad	Ad	Ad	Ad	Ad
chr1D	417649501	417667500	18000	AA	dd	AA	AA	AA	AA	AA	AA	AA	AA	AA	AA	AA	AA	AA	AA	AA	AA	AA	AA	AA	AA	AA	AA	AA	AA	AA	AA	AA	AA	AA	AA	AA	dd	AA	AA	AA	AA	AA	AA	AA	AA	AA	AA	AA	AA
chr1D	417677001	417686000	9000	AA	dd	AA	AA	AA	AB	AA	AA	AA	AA	AA	AA	AA	AB	AA	AA	AA	AA	AA	Ad	AA	AA	AA	AA	AA	AA	AA	AA	AA	AA	AA	AA	AA	dd	AA	AA	AA	AA	AA	AA	AA	AA	AA	AA	AA	AA
chr1D	418052001	418056500	4500	AA	dd	AA	Ad	AA	AA	Ad	Ad	AA	AA	Ad	Ad	Ad	AA	Ad	AA	Ad	Ad	Ad	AA	AA	Ad	AA	AA	AA	Ad	AA	Ad	AA	AA	Ad	Ad	AA	dd	Ad	dd	Ad	Ad	Ad	Ad	Ad	Ad	Ad	Ad	Ad	Ad
chr1D	418254501	418258500	4000	AA	dd	AB	AA	AA	AB	AB	AB	AB	AA	AA	AB	AA	AB	AA	AA	AA	AA	AA	AA	AA	AA	AA	AA	AA	AA	AA	AA	AA	AA	AA	AA	AB	dd	AA	dd	AA	AA	AA	AA	AA	AA	AA	AA	AA	AA
chr1D	418342501	418350000	7500	AA	dd	AA	AA	AA	Ad	AA	AA	AA	AA	AA	AA	AA	AA	AA	AA	AA	AA	AA	AA	AA	AA	Ad	AA	AA	AA	AA	AA	AA	AA	AA	AA	AA	dd	AA	dd	AA	Ad	AA	AA	Ad	AA	AA	Ad	Ad	Ad
chr1D	418373001	418404000	31000	AA	dd	AA	AA	AA	AA	AA	AA	AA	AA	AA	AA	AA	AA	AA	AA	AA	AA	AA	AA	AA	AA	AA	AA	AA	AA	AA	AA	AA	AA	AA	AA	AA	dd	AA	dd	AA	AA	AA	AA	AA	AA	AA	AA	AA	AA
chr1D	418392501	418404500	12000	AA	dd	AA	AA	AA	AA	AA	AA	AA	AA	AA	AA	AA	AA	AA	AA	AA	AA	AA	AA	AA	AA	AA	AA	AA	AA	AA	AA	AA	AA	AA	AA	AA	dd	AA	dd	AA	AA	AA	AA	AA	AA	AA	AA	AA	AA
chr1D	418474001	418479000	5000	AA	dd	AB	AA	AA	AB	AA	AA	AA	AA	AA	AA	AA	AB	AB	AA	AA	AA	AB	AA	AA	AA	AA	AA	AA	AA	AA	AB	AA	AA	AA	AA	AB	dd	AA	dd	AA	AA	AA	AA	AA	AA	AA	AA	AA	AA
chr1D	418474001	418487000	13000	AA	dd	AA	AA	AA	AA	AA	AA	AA	AA	AA	AA	AA	AA	AA	AA	AA	AA	AA	AA	AB	AA	AA	AA	AA	AA	AA	AA	AA	AA	AA	AA	AA	dd	AA	dd	AA	AA	AA	AA	AA	AA	AA	AA	AA	AA
chr1D	418544501	418550000	5500	AA	dd	AA	AA	AA	AA	AA	AA	AA	AA	AB	AA	AA	AA	AA	AA	AA	AA	AA	AA	AA	AA	AA	AA	AA	AA	AA	AB	AA	AA	AA	AA	AA	dd	AA	Ad	AA	AA	AA	AA	AA	AA	AA	AA	AA	AA
chr1D	418588001	418605500	17500	AA	dd	AA	AA	AA	AA	AA	AA	AA	AA	AA	AA	AA	AA	AA	AA	AA	AA	AA	AA	AA	AA	AA	AA	AA	AA	AA	AA	AA	AA	AA	AA	AA	dd	AA	dd	AA	AA	AA	AA	AA	AA	AA	AA	AA	AA
chr1D	418610501	418616000	5500	AA	dd	AA	AA	AA	AA	AA	AA	Ad	AA	Ad	Ad	AA	AA	AA	AA	AA	AA	AA	AA	AA	AA	AA	AA	AA	AA	AA	Ad	AA	AA	AA	Ad	AA	dd	AA	dd	AA	AA	AA	AA	AA	AA	AA	AA	AA	AA
chr1D	418622501	418630000	7500	AA	dd	AA	AB	AA	AA	AA	AA	AA	AA	AA	AA	AA	AB	AA	AA	AB	AA	AB	AA	AA	AA	AA	AA	AA	AA	AA	AB	AA	AA	AA	AA	AA	dd	AA	dd	AA	AA	AA	AA	AA	AA	AA	AA	AA	AA
chr1D	418670501	418675000	4500	AA	dd	AA	AA	AB	AA	AA	AA	AB	AA	AA	AA	AA	AA	AA	AB	AA	AA	AA	AA	AA	AA	AA	AA	AA	AA	AA	AA	AA	AA	AA	AA	AA	dd	AA	dd	AA	AA	AA	AA	AA	AA	AA	AA	AA	AB
chr1D	418822001	418827500	5500	dd	dd	dd	dd	dd	dd	dd	dd	dd	dd	dd	dd	dd	dd	dd	dd	dd	dd	dd	dd	dd	dd	dd	dd	dd	dd	dd	dd	dd	dd	dd	dd	dd	dd	dd	dd	dd	dd	dd	dd	dd	dd	dd	dd	dd	dd
chr1D	418831501	418836000	4500	dd	dd	dd	dd	dd	dd	dd	dd	dd	dd	dd	dd	dd	dd	dd	dd	dd	dd	dd	dd	dd	dd	dd	dd	dd	dd	dd	dd	dd	dd	dd	dd	dd	dd	dd	dd	dd	dd	dd	dd	dd	dd	dd	dd	dd	dd
chr1D	419317501	419324500	7000	Ad	dd	Ad	Ad	Ad	Ad	Ad	Ad	Ad	Ad	Ad	Ad	Ad	Ad	Ad	Ad	Ad	Ad	Ad	Ad	Ad	Ad	Ad	Ad	Ad	Ad	Ad	Ad	Ad	Ad	Ad	Ad	Ad	dd	dd	dd	dd	dd	Ad	Ad	Ad	Ad	Ad	Ad	dd	dd
chr1D	419575001	419582000	7000	AA	dd	Ad	AA	AA	AA	AA	AA	AA	AA	Ad	AA	AA	AA	AA	AA	Ad	AA	AA	AA	Ad	AA	AA	Ad	Ad	AA	AA	AA	AA	Ad	AA	AA	Ad	dd	Ad	dd	Ad	Ad	Ad	AA	Ad	Ad	Ad	Ad	Ad	Ad
chr1D	419771501	419818000	46500	AA	dd	AA	AA	AA	AA	AA	AA	AA	AA	AA	AA	AA	AA	AA	AA	AA	AA	AA	AA	AA	AA	AA	AA	AA	AA	AA	AA	AA	AA	AA	AA	AA	dd	AA	AA	AA	AA	AA	AA	AA	AA	AA	AA	AA	AA
chr1D	419842001	419859000	17000	AA	dd	AA	AA	AA	AA	AA	AA	AA	AA	AA	AA	AA	AA	AA	AA	AA	AA	AA	AA	AA	AA	AA	AA	AA	AA	AA	AA	AA	AA	AA	AA	AA	dd	AA	AA	AB	AA	AA	AA	AA	AA	AA	AA	AA	AA
chr1D	419865501	419885000	19500	AA	dd	AA	AA	AA	AA	AA	AA	AA	AA	AA	AA	AA	AA	AA	AA	AA	AA	AA	AA	AA	AA	AA	AA	AA	AA	AA	AB	AA	AA	AA	AA	AA	dd	AA	AA	AA	AA	AA	AA	AA	AA	AA	AA	AA	AA
chr1D	419920001	419932000	12000	AA	dd	AA	AA	AA	AA	AA	AA	AA	AA	AA	AA	AA	AA	AA	AA	AA	AA	AA	AA	AA	AA	AA	AA	AA	AA	AA	AA	AA	AA	AA	AA	AA	dd	AA	Ad	AA	AA	AA	AA	AA	AA	AA	AA	AA	AA
chr1D	419920001	419954500	34500	AA	dd	AA	AA	AA	AA	AA	AA	AA	AA	AA	AA	AA	AA	AA	AA	AA	AA	AA	AA	AA	AA	AA	AA	AA	AA	AA	AA	AA	AA	AA	AA	AA	dd	AA	AA	AA	AA	AA	AA	AA	AA	AA	AA	AA	AA
chr1D	419943001	419954500	11500	AA	dd	AA	AA	AA	AA	AA	AA	AA	AA	AA	AA	AA	AA	AA	AA	AA	AA	AA	Ad	AA	AA	AA	AA	AA	AA	AA	AA	AA	AA	AA	AA	AA	dd	AA	AA	Ad	Ad	AA	AA	Ad	AA	AA	AA	AA	AA
chr1D	419993501	419998500	5000	Ad	dd	Ad	Ad	AA	Ad	Ad	AA	AA	AA	Ad	AA	Ad	AA	AA	AA	AA	AA	Ad	Ad	Ad	AA	AA	AA	AA	Ad	AA	Ad	AA	AA	AA	Ad	AA	dd	AA	AA	AB	AA	AA	AA	AA	AA	AA	AA	AA	AA
chr1D	419995501	420005500	10000	AA	dd	AA	AA	AA	AA	AA	AA	AA	AA	AA	AA	AA	AA	AA	AA	AA	AA	AA	AA	AA	AA	AA	AA	AA	AA	AA	AA	AA	AA	AA	AA	AA	dd	AA	AA	AB	AA	AA	AA	AA	AA	AA	AA	AA	AA
chr1D	420001501	420005500	4000	AA	dd	AA	AA	AA	AA	AA	AA	AA	AA	AA	AA	AA	AA	AA	AA	AA	AA	AA	AA	AB	AA	AA	AA	AA	AA	AA	AA	AA	AA	AA	AA	AB	dd	AA	AA	AB	AA	AA	AA	AA	AA	AA	AA	AA	AB
chr1D	420328501	420345000	16500	AA	dd	AA	AA	AA	AA	AA	AA	AA	AA	AA	AA	AA	AA	AA	AA	AA	AA	AA	AA	AA	AA	AA	AA	AA	AA	AA	AA	AA	AA	AA	AA	AA	dd	AA	Ad	AA	Ad	AA	AA	AA	AA	AA	AA	AA	AA
chr1D	420363501	420367500	4000	AA	dd	AA	AA	AA	AA	AA	AA	AA	AA	AA	AA	AA	AA	AA	AA	AA	AA	AA	AA	AA	AA	AA	AA	AA	Ad	AA	AA	Ad	AA	AA	AA	AA	dd	Ad	AA	AA	AA	Ad	AA	Ad	AA	AA	AA	AA	AA
chr1D	420460001	420471500	11500	AA	dd	AA	AA	AA	AA	AA	AA	AA	AA	AA	AA	AA	AA	AA	AA	AA	AA	AA	AA	AA	AA	AA	AA	AA	AA	AB	AA	AA	AA	AA	AA	AA	dd	Ad	Ad	AA	AA	Ad	AA	AA	Ad	AA	AA	AA	Ad
chr1D	420489501	420501000	11500	AA	dd	AA	AA	AA	AA	AA	AA	AA	AA	AA	AA	AA	AA	AA	AA	AA	AA	AA	dd	AA	AA	AA	AA	AA	AA	AA	AA	AA	AA	AA	AA	AA	dd	AA	AA	AA	AA	AA	AA	AA	AA	AA	AA	AA	AA
chr1D	420515501	420520500	5000	AA	dd	AA	AA	AA	AA	AA	AA	AA	AA	AA	AA	AA	AA	AA	AA	AA	AA	AA	AA	AA	AA	AA	AA	AA	AA	AA	AA	AA	AA	AA	AA	AA	dd	Ad	AA	Ad	Ad	Ad	AA	Ad	AA	Ad	Ad	AA	Ad
chr1D	420524501	420533000	8500	AA	dd	AA	AA	AA	AA	AA	AA	AA	AA	AA	AA	AA	AA	AA	AA	AA	AA	AA	AA	AA	AA	AA	AA	AA	AA	AA	AA	AA	AA	AA	AA	AA	dd	AA	AA	Ad	Ad	AA	AA	AA	AA	AA	AA	AA	AA
chr1D	420611501	420615500	4000	AB	AA	AA	AA	AB	AA	AA	AA	AA	AA	AA	AA	AA	AA	AA	AA	AA	Ad	AA	AA	AA	AA	Ad	dd	AA	AA	AA	AA	AA	AB	AA	AB	AA	AA	AA	AA	AA	AA	AA	AA	AA	Ad	AA	AA	AA	Ad
chr1D	420693001	420697500	4500	AA	dd	AA	AA	AA	AA	dd	AA	AA	AA	AA	AA	AA	AB	AA	AA	AA	dd	AA	AA	AA	AA	AA	AA	AA	AB	AA	AA	AA	AA	AA	AA	AA	dd	AA	AA	AA	AA	AA	AA	AA	AA	AA	AA	AA	AA
[truncated: 18,080 more rows]
[truncated: 31 more columns]
